# Supplementary material for: Integrated Analyses of microRNAs Demonstrate Their Widespread Influence on Gene Expression in High-Grade Serous Ovarian Carcinoma
Source: PLoS One. 2012 Mar 29;7(3):e34546. doi: 10.1371/journal.pone.0034546 (PMC3315571; doi:10.1371/journal.pone.0034546)
Supplement: Dataset S2 — miR:mRNA pairs correlated with tumor subtype. (XLSX) [file pone.0034546.s002.xlsx]

## Sheet: gene_HIGH_C1_miR_LOW_C1
					Enrichment, miR targets within gene set (one-sided Fisher's exact)
miRNA accession	miRNA name	Gene ID	Gene Symbol	Gene Title	Miranda targets on entire array	Miranda, enrichment P-value	TargetScan targets on entire array	TargetScan, enrichment P-value
MIMAT0000437	hsa-miR-145	2070	EYA4	eyes absent homolog 4 (Drosophila)	1099	0.205915	398	0.239912
MIMAT0000437	hsa-miR-145	22871	NLGN1	neuroligin 1	1099	0.205915	398	0.239912
MIMAT0000437	hsa-miR-145	23089	PEG10	paternally expressed 10	1099	0.205915	398	0.239912
MIMAT0000437	hsa-miR-145	26050	SLITRK5	SLIT and NTRK-like family, member 5	1099	0.205915	398	0.239912
MIMAT0000437	hsa-miR-145	339047	LOC339047	hypothetical protein LOC339047	1099	0.205915	398	0.239912
MIMAT0000437	hsa-miR-145	3768	KCNJ12	potassium inwardly-rectifying channel, subfamily J, member 12	1099	0.205915	398	0.239912
MIMAT0000437	hsa-miR-145	55117	SLC6A15	solute carrier family 6, member 15	1099	0.205915	398	0.239912
MIMAT0000437	hsa-miR-145	64208	POPDC3	popeye domain containing 3	1099	0.205915	398	0.239912
MIMAT0000437	hsa-miR-145	6666	SOX12	SRY (sex determining region Y)-box 12	1099	0.205915	398	0.239912
MIMAT0000437	hsa-miR-145	81621	KAZALD1	Kazal-type serine peptidase inhibitor domain 1	1099	0.205915	398	0.239912
MIMAT0000437	hsa-miR-145	8549	LGR5	leucine-rich repeat-containing G protein-coupled receptor 5	1099	0.205915	398	0.239912
MIMAT0000437	hsa-miR-145	9924	PAN2	PAN2 polyA specific ribonuclease subunit homolog (S. cerevisiae)	1099	0.205915	398	0.239912
MIMAT0000063	hsa-let-7b	10643	IGF2BP3	insulin-like growth factor 2 mRNA binding protein 3	1026	0.491801	596	0.38112
MIMAT0000063	hsa-let-7b	2045	EPHA7	EPH receptor A7	1026	0.491801	596	0.38112
MIMAT0000063	hsa-let-7b	2146	EZH2	enhancer of zeste homolog 2 (Drosophila)	1026	0.491801	596	0.38112
MIMAT0000063	hsa-let-7b	339047	LOC339047	hypothetical protein LOC339047	1026	0.491801	596	0.38112
MIMAT0000063	hsa-let-7b	4893	NRAS	neuroblastoma RAS viral (v-ras) oncogene homolog	1026	0.491801	596	0.38112
MIMAT0000063	hsa-let-7b	56901	NDUFA4L2	NADH dehydrogenase (ubiquinone) 1 alpha subcomplex, 4-like 2	1026	0.491801	596	0.38112
MIMAT0000063	hsa-let-7b	65108	MARCKSL1	MARCKS-like 1	1026	0.491801	596	0.38112
MIMAT0000063	hsa-let-7b	6666	SOX12	SRY (sex determining region Y)-box 12	1026	0.491801	596	0.38112
MIMAT0000063	hsa-let-7b	81669	CCNL2	cyclin L2	1026	0.491801	596	0.38112
MIMAT0000736	hsa-miR-381	10242	KCNMB2	potassium large conductance calcium-activated channel, subfamily M, beta member 2	1133	NS	501	NS
MIMAT0000736	hsa-miR-381	2070	EYA4	eyes absent homolog 4 (Drosophila)	1133	NS	501	NS
MIMAT0000736	hsa-miR-381	2620	GAS2	growth arrest-specific 2	1133	NS	501	NS
MIMAT0000736	hsa-miR-381	4893	NRAS	neuroblastoma RAS viral (v-ras) oncogene homolog	1133	NS	501	NS
MIMAT0000736	hsa-miR-381	55117	SLC6A15	solute carrier family 6, member 15	1133	NS	501	NS
MIMAT0000736	hsa-miR-381	64208	POPDC3	popeye domain containing 3	1133	NS	501	NS
MIMAT0000231	hsa-miR-199a-5p	2045	EPHA7	EPH receptor A7	884	NS	293	NS
MIMAT0000231	hsa-miR-199a-5p	2070	EYA4	eyes absent homolog 4 (Drosophila)	884	NS	293	NS
MIMAT0000231	hsa-miR-199a-5p	2620	GAS2	growth arrest-specific 2	884	NS	293	NS
MIMAT0000231	hsa-miR-199a-5p	26993	AKAP8L	A kinase (PRKA) anchor protein 8-like	884	NS	293	NS
MIMAT0000231	hsa-miR-199a-5p	27065	D4S234E	DNA segment on chromosome 4 (unique) 234 expressed sequence	884	NS	293	NS
MIMAT0000231	hsa-miR-199a-5p	51348	KLRF1	killer cell lectin-like receptor subfamily F, member 1	884	NS	293	NS
MIMAT0000231	hsa-miR-199a-5p	6666	SOX12	SRY (sex determining region Y)-box 12	884	NS	293	NS
MIMAT0000448	hsa-miR-136	2070	EYA4	eyes absent homolog 4 (Drosophila)	1335	NS	97	0.558663
MIMAT0000448	hsa-miR-136	2239	GPC4	glypican 4	1335	NS	97	0.558663
MIMAT0000448	hsa-miR-136	23089	PEG10	paternally expressed 10	1335	NS	97	0.558663
MIMAT0000448	hsa-miR-136	4485	MST1	macrophage stimulating 1 (hepatocyte growth factor-like)	1335	NS	97	0.558663
MIMAT0000448	hsa-miR-136	9254	CACNA2D2	calcium channel, voltage-dependent, alpha 2/delta subunit 2	1335	NS	97	0.558663

## Sheet: gene_LOW_C1_miR_HIGH_C1
					Enrichment, miR targets within gene set (one-sided Fisher's exact)
miRNA accession	miRNA name	Gene ID	Gene Symbol	Gene Title	Miranda targets on entire array	Miranda, enrichment P-value	TargetScan targets on entire array	TargetScan, enrichment P-value
MIMAT0000261	hsa-miR-183	10186	LHFP	lipoma HMGIC fusion partner	805	0.0115835	220	NS
MIMAT0000261	hsa-miR-183	10457	GPNMB	glycoprotein (transmembrane) nmb	805	0.0115835	220	NS
MIMAT0000261	hsa-miR-183	10611	PDLIM5	PDZ and LIM domain 5	805	0.0115835	220	NS
MIMAT0000261	hsa-miR-183	10659	CELF2	CUG triplet repeat, RNA binding protein 2	805	0.0115835	220	NS
MIMAT0000261	hsa-miR-183	11221	DUSP10	dual specificity phosphatase 10	805	0.0115835	220	NS
MIMAT0000261	hsa-miR-183	115207	KCTD12	potassium channel tetramerisation domain containing 12	805	0.0115835	220	NS
MIMAT0000261	hsa-miR-183	1281	COL3A1	collagen, type III, alpha 1 (Ehlers-Danlos syndrome type IV, autosomal dominant)	805	0.0115835	220	NS
MIMAT0000261	hsa-miR-183	1536	CYBB	cytochrome b-245, beta polypeptide (chronic granulomatous disease)	805	0.0115835	220	NS
MIMAT0000261	hsa-miR-183	1827	RCAN1	regulator of calcineurin 1	805	0.0115835	220	NS
MIMAT0000261	hsa-miR-183	1836	SLC26A2	solute carrier family 26 (sulfate transporter), member 2	805	0.0115835	220	NS
MIMAT0000261	hsa-miR-183	1958	EGR1	early growth response 1	805	0.0115835	220	NS
MIMAT0000261	hsa-miR-183	2012	EMP1	epithelial membrane protein 1	805	0.0115835	220	NS
MIMAT0000261	hsa-miR-183	219654	ZCCHC24	chromosome 10 open reading frame 56	805	0.0115835	220	NS
MIMAT0000261	hsa-miR-183	2246	FGF1	fibroblast growth factor 1 (acidic)	805	0.0115835	220	NS
MIMAT0000261	hsa-miR-183	2568	GABRP	gamma-aminobutyric acid (GABA) A receptor, pi	805	0.0115835	220	NS
MIMAT0000261	hsa-miR-183	3109	HLA-DMB	major histocompatibility complex, class II, DM beta	805	0.0115835	220	NS
MIMAT0000261	hsa-miR-183	313	AOAH	acyloxyacyl hydrolase (neutrophil)	805	0.0115835	220	NS
MIMAT0000261	hsa-miR-183	3479	IGF1	insulin-like growth factor 1 (somatomedin C)	805	0.0115835	220	NS
MIMAT0000261	hsa-miR-183	355	FAS	Fas (TNF receptor superfamily, member 6)	805	0.0115835	220	NS
MIMAT0000261	hsa-miR-183	3556	IL1RAP	interleukin 1 receptor accessory protein	805	0.0115835	220	NS
MIMAT0000261	hsa-miR-183	3751	KCND2	potassium voltage-gated channel, Shal-related subfamily, member 2	805	0.0115835	220	NS
MIMAT0000261	hsa-miR-183	4053	LTBP2	latent transforming growth factor beta binding protein 2	805	0.0115835	220	NS
MIMAT0000261	hsa-miR-183	4208	MEF2C	myocyte enhancer factor 2C	805	0.0115835	220	NS
MIMAT0000261	hsa-miR-183	4478	MSN	moesin	805	0.0115835	220	NS
MIMAT0000261	hsa-miR-183	5328	PLAU	plasminogen activator, urokinase	805	0.0115835	220	NS
MIMAT0000261	hsa-miR-183	5396	PRRX1	paired related homeobox 1	805	0.0115835	220	NS
MIMAT0000261	hsa-miR-183	54541	DDIT4	DNA-damage-inducible transcript 4	805	0.0115835	220	NS
MIMAT0000261	hsa-miR-183	5552	SRGN	serglycin	805	0.0115835	220	NS
MIMAT0000261	hsa-miR-183	55970	GNG12	guanine nucleotide binding protein (G protein), gamma 12	805	0.0115835	220	NS
MIMAT0000261	hsa-miR-183	56935	C11orf75	chromosome 11 open reading frame 75	805	0.0115835	220	NS
MIMAT0000261	hsa-miR-183	56937	PMEPA1	prostate transmembrane protein, androgen induced 1	805	0.0115835	220	NS
MIMAT0000261	hsa-miR-183	57419	SLC24A3	solute carrier family 24 (sodium/potassium/calcium exchanger), member 3	805	0.0115835	220	NS
MIMAT0000261	hsa-miR-183	5743	PTGS2	prostaglandin-endoperoxide synthase 2 (prostaglandin G/H synthase and cyclooxygenase)	805	0.0115835	220	NS
MIMAT0000261	hsa-miR-183	5791	PTPRE	protein tyrosine phosphatase, receptor type, E	805	0.0115835	220	NS
MIMAT0000261	hsa-miR-183	5999	RGS4	regulator of G-protein signaling 4	805	0.0115835	220	NS
MIMAT0000261	hsa-miR-183	6319	SCD	stearoyl-CoA desaturase (delta-9-desaturase)	805	0.0115835	220	NS
MIMAT0000261	hsa-miR-183	64236	PDLIM2	PDZ and LIM domain 2 (mystique)	805	0.0115835	220	NS
MIMAT0000261	hsa-miR-183	64388	GREM2	gremlin 2, cysteine knot superfamily, homolog (Xenopus laevis)	805	0.0115835	220	NS
MIMAT0000261	hsa-miR-183	6444	SGCD	sarcoglycan, delta (35kDa dystrophin-associated glycoprotein)	805	0.0115835	220	NS
MIMAT0000261	hsa-miR-183	64581	CLEC7A	C-type lectin domain family 7, member A	805	0.0115835	220	NS
MIMAT0000261	hsa-miR-183	6867	TACC1	transforming, acidic coiled-coil containing protein 1	805	0.0115835	220	NS
MIMAT0000261	hsa-miR-183	7078	TIMP3	TIMP metallopeptidase inhibitor 3 (Sorsby fundus dystrophy, pseudoinflammatory)	805	0.0115835	220	NS
MIMAT0000261	hsa-miR-183	7168	TPM1	tropomyosin 1 (alpha)	805	0.0115835	220	NS
MIMAT0000261	hsa-miR-183	7169	TPM2	tropomyosin 2 (beta)	805	0.0115835	220	NS
MIMAT0000261	hsa-miR-183	7305	TYROBP	TYRO protein tyrosine kinase binding protein	805	0.0115835	220	NS
MIMAT0000261	hsa-miR-183	7456	WIPF1	WAS/WASL interacting protein family, member 1	805	0.0115835	220	NS
MIMAT0000261	hsa-miR-183	775	CACNA1C	calcium channel, voltage-dependent, L type, alpha 1C subunit	805	0.0115835	220	NS
MIMAT0000261	hsa-miR-183	800	CALD1	caldesmon 1	805	0.0115835	220	NS
MIMAT0000261	hsa-miR-183	81035	COLEC12	collectin sub-family member 12	805	0.0115835	220	NS
MIMAT0000261	hsa-miR-183	860	RUNX2	runt-related transcription factor 2	805	0.0115835	220	NS
MIMAT0000261	hsa-miR-183	8826	IQGAP1	IQ motif containing GTPase activating protein 1	805	0.0115835	220	NS
MIMAT0000261	hsa-miR-183	8829	NRP1	neuropilin 1	805	0.0115835	220	NS
MIMAT0000261	hsa-miR-183	9208	LRRFIP1	leucine rich repeat (in FLII) interacting protein 1	805	0.0115835	220	NS
MIMAT0000261	hsa-miR-183	9370	ADIPOQ	adiponectin, C1Q and collagen domain containing	805	0.0115835	220	NS
MIMAT0000261	hsa-miR-183	9839	ZEB2	zinc finger E-box binding homeobox 2	805	0.0115835	220	NS
MIMAT0000261	hsa-miR-183	9902	MRC2	mannose receptor, C type 2	805	0.0115835	220	NS
MIMAT0000075	hsa-miR-20a	1026	CDKN1A	cyclin-dependent kinase inhibitor 1A (p21, Cip1)	1515	0.0148746	709	0.0577176
MIMAT0000075	hsa-miR-20a	10611	PDLIM5	PDZ and LIM domain 5	1515	0.0148746	709	0.0577176
MIMAT0000075	hsa-miR-20a	10630	PDPN	podoplanin	1515	0.0148746	709	0.0577176
MIMAT0000075	hsa-miR-20a	10659	CELF2	CUG triplet repeat, RNA binding protein 2	1515	0.0148746	709	0.0577176
MIMAT0000075	hsa-miR-20a	10875	FGL2	fibrinogen-like 2	1515	0.0148746	709	0.0577176
MIMAT0000075	hsa-miR-20a	112399	EGLN3	egl nine homolog 3 (C. elegans)	1515	0.0148746	709	0.0577176
MIMAT0000075	hsa-miR-20a	1264	CNN1	calponin 1, basic, smooth muscle	1515	0.0148746	709	0.0577176
MIMAT0000075	hsa-miR-20a	1316	KLF6	Kruppel-like factor 6	1515	0.0148746	709	0.0577176
MIMAT0000075	hsa-miR-20a	1513	CTSK	cathepsin K	1515	0.0148746	709	0.0577176
MIMAT0000075	hsa-miR-20a	1520	CTSS	cathepsin S	1515	0.0148746	709	0.0577176
MIMAT0000075	hsa-miR-20a	1536	CYBB	cytochrome b-245, beta polypeptide (chronic granulomatous disease)	1515	0.0148746	709	0.0577176
MIMAT0000075	hsa-miR-20a	1604	CD55	CD55 molecule, decay accelerating factor for complement (Cromer blood group)	1515	0.0148746	709	0.0577176
MIMAT0000075	hsa-miR-20a	1806	DPYD	dihydropyrimidine dehydrogenase	1515	0.0148746	709	0.0577176
MIMAT0000075	hsa-miR-20a	1958	EGR1	early growth response 1	1515	0.0148746	709	0.0577176
MIMAT0000075	hsa-miR-20a	1959	EGR2	early growth response 2 (Krox-20 homolog, Drosophila)	1515	0.0148746	709	0.0577176
MIMAT0000075	hsa-miR-20a	2115	ETV1	ets variant gene 1	1515	0.0148746	709	0.0577176
MIMAT0000075	hsa-miR-20a	2152	F3	coagulation factor III (thromboplastin, tissue factor)	1515	0.0148746	709	0.0577176
MIMAT0000075	hsa-miR-20a	219654	ZCCHC24	chromosome 10 open reading frame 56	1515	0.0148746	709	0.0577176
MIMAT0000075	hsa-miR-20a	2200	FBN1	fibrillin 1	1515	0.0148746	709	0.0577176
MIMAT0000075	hsa-miR-20a	223117	SEMA3D	sema domain, immunoglobulin domain (Ig), short basic domain, secreted, (semaphorin) 3D	1515	0.0148746	709	0.0577176
MIMAT0000075	hsa-miR-20a	23037	PDZD2	PDZ domain containing 2	1515	0.0148746	709	0.0577176
MIMAT0000075	hsa-miR-20a	23345	SYNE1	spectrin repeat containing, nuclear envelope 1	1515	0.0148746	709	0.0577176
MIMAT0000075	hsa-miR-20a	23508	TTC9	tetratricopeptide repeat domain 9	1515	0.0148746	709	0.0577176
MIMAT0000075	hsa-miR-20a	259230	SGMS1	sphingomyelin synthase 1	1515	0.0148746	709	0.0577176
MIMAT0000075	hsa-miR-20a	26056	RAB11FIP5	RAB11 family interacting protein 5 (class I)	1515	0.0148746	709	0.0577176
MIMAT0000075	hsa-miR-20a	2697	GJA1	gap junction protein, alpha 1, 43kDa	1515	0.0148746	709	0.0577176
MIMAT0000075	hsa-miR-20a	27242	TNFRSF21	tumor necrosis factor receptor superfamily, member 21	1515	0.0148746	709	0.0577176
MIMAT0000075	hsa-miR-20a	27253	PCDH17	protocadherin 17	1515	0.0148746	709	0.0577176
MIMAT0000075	hsa-miR-20a	29	ABR	active BCR-related gene	1515	0.0148746	709	0.0577176
MIMAT0000075	hsa-miR-20a	355	FAS	Fas (TNF receptor superfamily, member 6)	1515	0.0148746	709	0.0577176
MIMAT0000075	hsa-miR-20a	3556	IL1RAP	interleukin 1 receptor accessory protein	1515	0.0148746	709	0.0577176
MIMAT0000075	hsa-miR-20a	3624	INHBA	inhibin, beta A	1515	0.0148746	709	0.0577176
MIMAT0000075	hsa-miR-20a	389136	VGLL3	vestigial like 3 (Drosophila)	1515	0.0148746	709	0.0577176
MIMAT0000075	hsa-miR-20a	4005	LMO2	LIM domain only 2 (rhombotin-like 1)	1515	0.0148746	709	0.0577176
MIMAT0000075	hsa-miR-20a	4094	MAF	v-maf musculoaponeurotic fibrosarcoma oncogene homolog (avian)	1515	0.0148746	709	0.0577176
MIMAT0000075	hsa-miR-20a	4208	MEF2C	myocyte enhancer factor 2C	1515	0.0148746	709	0.0577176
MIMAT0000075	hsa-miR-20a	4217	MAP3K5	mitogen-activated protein kinase kinase kinase 5	1515	0.0148746	709	0.0577176
MIMAT0000075	hsa-miR-20a	4313	MMP2	matrix metallopeptidase 2 (gelatinase A, 72kDa gelatinase, 72kDa type IV collagenase)	1515	0.0148746	709	0.0577176
MIMAT0000075	hsa-miR-20a	4316	MMP7	matrix metallopeptidase 7 (matrilysin, uterine)	1515	0.0148746	709	0.0577176
MIMAT0000075	hsa-miR-20a	4478	MSN	moesin	1515	0.0148746	709	0.0577176
MIMAT0000075	hsa-miR-20a	4481	MSR1	macrophage scavenger receptor 1	1515	0.0148746	709	0.0577176
MIMAT0000075	hsa-miR-20a	4638	MYLK	myosin light chain kinase	1515	0.0148746	709	0.0577176
MIMAT0000075	hsa-miR-20a	474344	GIMAP6	GTPase, IMAP family member 6	1515	0.0148746	709	0.0577176
MIMAT0000075	hsa-miR-20a	50863	NTM	neurotrimin	1515	0.0148746	709	0.0577176
MIMAT0000075	hsa-miR-20a	51338	MS4A4A	membrane-spanning 4-domains, subfamily A, member 4	1515	0.0148746	709	0.0577176
MIMAT0000075	hsa-miR-20a	51474	LIMA1	LIM domain and actin binding 1	1515	0.0148746	709	0.0577176
MIMAT0000075	hsa-miR-20a	5396	PRRX1	paired related homeobox 1	1515	0.0148746	709	0.0577176
MIMAT0000075	hsa-miR-20a	54518	APBB1IP	amyloid beta (A4) precursor protein-binding, family B, member 1 interacting protein	1515	0.0148746	709	0.0577176
MIMAT0000075	hsa-miR-20a	5468	PPARG	peroxisome proliferator-activated receptor gamma	1515	0.0148746	709	0.0577176
MIMAT0000075	hsa-miR-20a	54704	PDP1	protein phosphatase 2C, magnesium-dependent, catalytic subunit	1515	0.0148746	709	0.0577176
MIMAT0000075	hsa-miR-20a	54832	VPS13C	vacuolar protein sorting 13 homolog C (S. cerevisiae)	1515	0.0148746	709	0.0577176
MIMAT0000075	hsa-miR-20a	55083	KIF26B	kinesin family member 26B	1515	0.0148746	709	0.0577176
MIMAT0000075	hsa-miR-20a	55353	LAPTM4B	lysosomal associated protein transmembrane 4 beta	1515	0.0148746	709	0.0577176
MIMAT0000075	hsa-miR-20a	55365	TMEM176A	transmembrane protein 176A	1515	0.0148746	709	0.0577176
MIMAT0000075	hsa-miR-20a	55450	CAMK2N1	calcium/calmodulin-dependent protein kinase II inhibitor 1	1515	0.0148746	709	0.0577176
MIMAT0000075	hsa-miR-20a	55803	ADAP2	centaurin, alpha 2	1515	0.0148746	709	0.0577176
MIMAT0000075	hsa-miR-20a	5583	PRKCH	protein kinase C, eta	1515	0.0148746	709	0.0577176
MIMAT0000075	hsa-miR-20a	55841	WWC3	WWC family member 3	1515	0.0148746	709	0.0577176
MIMAT0000075	hsa-miR-20a	5650	KLK7	kallikrein-related peptidase 7	1515	0.0148746	709	0.0577176
MIMAT0000075	hsa-miR-20a	57205	ATP10D	ATPase, class V, type 10D	1515	0.0148746	709	0.0577176
MIMAT0000075	hsa-miR-20a	57419	SLC24A3	solute carrier family 24 (sodium/potassium/calcium exchanger), member 3	1515	0.0148746	709	0.0577176
MIMAT0000075	hsa-miR-20a	57493	HEG1	HEG homolog 1 (zebrafish)	1515	0.0148746	709	0.0577176
MIMAT0000075	hsa-miR-20a	5999	RGS4	regulator of G-protein signaling 4	1515	0.0148746	709	0.0577176
MIMAT0000075	hsa-miR-20a	6387	CXCL12	chemokine (C-X-C motif) ligand 12 (stromal cell-derived factor 1)	1515	0.0148746	709	0.0577176
MIMAT0000075	hsa-miR-20a	6444	SGCD	sarcoglycan, delta (35kDa dystrophin-associated glycoprotein)	1515	0.0148746	709	0.0577176
MIMAT0000075	hsa-miR-20a	6591	SNAI2	snail homolog 2 (Drosophila)	1515	0.0148746	709	0.0577176
MIMAT0000075	hsa-miR-20a	6653	SORL1	sortilin-related receptor, L(DLR class) A repeats-containing	1515	0.0148746	709	0.0577176
MIMAT0000075	hsa-miR-20a	667	DST	dystonin	1515	0.0148746	709	0.0577176
MIMAT0000075	hsa-miR-20a	6674	SPAG1	sperm associated antigen 1	1515	0.0148746	709	0.0577176
MIMAT0000075	hsa-miR-20a	7048	TGFBR2	transforming growth factor, beta receptor II (70/80kDa)	1515	0.0148746	709	0.0577176
MIMAT0000075	hsa-miR-20a	7056	THBD	thrombomodulin	1515	0.0148746	709	0.0577176
MIMAT0000075	hsa-miR-20a	7057	THBS1	thrombospondin 1	1515	0.0148746	709	0.0577176
MIMAT0000075	hsa-miR-20a	7071	KLF10	Kruppel-like factor 10	1515	0.0148746	709	0.0577176
MIMAT0000075	hsa-miR-20a	7078	TIMP3	TIMP metallopeptidase inhibitor 3 (Sorsby fundus dystrophy, pseudoinflammatory)	1515	0.0148746	709	0.0577176
MIMAT0000075	hsa-miR-20a	7456	WIPF1	WAS/WASL interacting protein family, member 1	1515	0.0148746	709	0.0577176
MIMAT0000075	hsa-miR-20a	775	CACNA1C	calcium channel, voltage-dependent, L type, alpha 1C subunit	1515	0.0148746	709	0.0577176
MIMAT0000075	hsa-miR-20a	800	CALD1	caldesmon 1	1515	0.0148746	709	0.0577176
MIMAT0000075	hsa-miR-20a	8038	ADAM12	ADAM metallopeptidase domain 12 (meltrin alpha)	1515	0.0148746	709	0.0577176
MIMAT0000075	hsa-miR-20a	8483	CILP	cartilage intermediate layer protein, nucleotide pyrophosphohydrolase	1515	0.0148746	709	0.0577176
MIMAT0000075	hsa-miR-20a	84981	C17orf91	chromosome 17 open reading frame 91	1515	0.0148746	709	0.0577176
MIMAT0000075	hsa-miR-20a	860	RUNX2	runt-related transcription factor 2	1515	0.0148746	709	0.0577176
MIMAT0000075	hsa-miR-20a	861	RUNX1	runt-related transcription factor 1 (acute myeloid leukemia 1; aml1 oncogene)	1515	0.0148746	709	0.0577176
MIMAT0000075	hsa-miR-20a	8828	NRP2	neuropilin 2	1515	0.0148746	709	0.0577176
MIMAT0000075	hsa-miR-20a	8850	KAT2B	p300/CBP-associated factor	1515	0.0148746	709	0.0577176
MIMAT0000075	hsa-miR-20a	8870	IER3	immediate early response 3	1515	0.0148746	709	0.0577176
MIMAT0000075	hsa-miR-20a	8935	SKAP2	src kinase associated phosphoprotein 2	1515	0.0148746	709	0.0577176
MIMAT0000075	hsa-miR-20a	9194	SLC16A7	solute carrier family 16, member 7 (monocarboxylic acid transporter 2)	1515	0.0148746	709	0.0577176
MIMAT0000075	hsa-miR-20a	9262	STK17B	serine/threonine kinase 17b	1515	0.0148746	709	0.0577176
MIMAT0000075	hsa-miR-20a	9547	CXCL14	chemokine (C-X-C motif) ligand 14	1515	0.0148746	709	0.0577176
MIMAT0000075	hsa-miR-20a	9764	KIAA0513	KIAA0513	1515	0.0148746	709	0.0577176
MIMAT0000075	hsa-miR-20a	9770	RASSF2	Ras association (RalGDS/AF-6) domain family member 2	1515	0.0148746	709	0.0577176
MIMAT0000075	hsa-miR-20a	9839	ZEB2	zinc finger E-box binding homeobox 2	1515	0.0148746	709	0.0577176
MIMAT0000075	hsa-miR-20a	9890	LPPR4	plasticity related gene 1	1515	0.0148746	709	0.0577176
MIMAT0000075	hsa-miR-20a	9891	NUAK1	NUAK family, SNF1-like kinase, 1	1515	0.0148746	709	0.0577176
MIMAT0000075	hsa-miR-20a	9945	GFPT2	glutamine-fructose-6-phosphate transaminase 2	1515	0.0148746	709	0.0577176
MIMAT0000075	hsa-miR-20a	9976	CLEC2B	C-type lectin domain family 2, member B	1515	0.0148746	709	0.0577176
MIMAT0001413	hsa-miR-20b	1026	CDKN1A	cyclin-dependent kinase inhibitor 1A (p21, Cip1)	1391	0.118598	709	0.0577176
MIMAT0001413	hsa-miR-20b	10611	PDLIM5	PDZ and LIM domain 5	1391	0.118598	709	0.0577176
MIMAT0001413	hsa-miR-20b	10630	PDPN	podoplanin	1391	0.118598	709	0.0577176
MIMAT0001413	hsa-miR-20b	10659	CELF2	CUG triplet repeat, RNA binding protein 2	1391	0.118598	709	0.0577176
MIMAT0001413	hsa-miR-20b	10875	FGL2	fibrinogen-like 2	1391	0.118598	709	0.0577176
MIMAT0001413	hsa-miR-20b	112399	EGLN3	egl nine homolog 3 (C. elegans)	1391	0.118598	709	0.0577176
MIMAT0001413	hsa-miR-20b	115207	KCTD12	potassium channel tetramerisation domain containing 12	1391	0.118598	709	0.0577176
MIMAT0001413	hsa-miR-20b	1264	CNN1	calponin 1, basic, smooth muscle	1391	0.118598	709	0.0577176
MIMAT0001413	hsa-miR-20b	1513	CTSK	cathepsin K	1391	0.118598	709	0.0577176
MIMAT0001413	hsa-miR-20b	1520	CTSS	cathepsin S	1391	0.118598	709	0.0577176
MIMAT0001413	hsa-miR-20b	1536	CYBB	cytochrome b-245, beta polypeptide (chronic granulomatous disease)	1391	0.118598	709	0.0577176
MIMAT0001413	hsa-miR-20b	1959	EGR2	early growth response 2 (Krox-20 homolog, Drosophila)	1391	0.118598	709	0.0577176
MIMAT0001413	hsa-miR-20b	2115	ETV1	ets variant gene 1	1391	0.118598	709	0.0577176
MIMAT0001413	hsa-miR-20b	2152	F3	coagulation factor III (thromboplastin, tissue factor)	1391	0.118598	709	0.0577176
MIMAT0001413	hsa-miR-20b	223117	SEMA3D	sema domain, immunoglobulin domain (Ig), short basic domain, secreted, (semaphorin) 3D	1391	0.118598	709	0.0577176
MIMAT0001413	hsa-miR-20b	23037	PDZD2	PDZ domain containing 2	1391	0.118598	709	0.0577176
MIMAT0001413	hsa-miR-20b	23167	EFR3A	EFR3 homolog A (S. cerevisiae)	1391	0.118598	709	0.0577176
MIMAT0001413	hsa-miR-20b	23345	SYNE1	spectrin repeat containing, nuclear envelope 1	1391	0.118598	709	0.0577176
MIMAT0001413	hsa-miR-20b	23508	TTC9	tetratricopeptide repeat domain 9	1391	0.118598	709	0.0577176
MIMAT0001413	hsa-miR-20b	23531	MMD	monocyte to macrophage differentiation-associated	1391	0.118598	709	0.0577176
MIMAT0001413	hsa-miR-20b	259230	SGMS1	sphingomyelin synthase 1	1391	0.118598	709	0.0577176
MIMAT0001413	hsa-miR-20b	26056	RAB11FIP5	RAB11 family interacting protein 5 (class I)	1391	0.118598	709	0.0577176
MIMAT0001413	hsa-miR-20b	2697	GJA1	gap junction protein, alpha 1, 43kDa	1391	0.118598	709	0.0577176
MIMAT0001413	hsa-miR-20b	27242	TNFRSF21	tumor necrosis factor receptor superfamily, member 21	1391	0.118598	709	0.0577176
MIMAT0001413	hsa-miR-20b	27253	PCDH17	protocadherin 17	1391	0.118598	709	0.0577176
MIMAT0001413	hsa-miR-20b	29	ABR	active BCR-related gene	1391	0.118598	709	0.0577176
MIMAT0001413	hsa-miR-20b	29931	LOH3CR2A	loss of heterozygosity, 3, chromosomal region 2, gene A	1391	0.118598	709	0.0577176
MIMAT0001413	hsa-miR-20b	355	FAS	Fas (TNF receptor superfamily, member 6)	1391	0.118598	709	0.0577176
MIMAT0001413	hsa-miR-20b	3556	IL1RAP	interleukin 1 receptor accessory protein	1391	0.118598	709	0.0577176
MIMAT0001413	hsa-miR-20b	3597	IL13RA1	interleukin 13 receptor, alpha 1	1391	0.118598	709	0.0577176
MIMAT0001413	hsa-miR-20b	3624	INHBA	inhibin, beta A	1391	0.118598	709	0.0577176
MIMAT0001413	hsa-miR-20b	389136	VGLL3	vestigial like 3 (Drosophila)	1391	0.118598	709	0.0577176
MIMAT0001413	hsa-miR-20b	3937	LCP2	lymphocyte cytosolic protein 2 (SH2 domain containing leukocyte protein of 76kDa)	1391	0.118598	709	0.0577176
MIMAT0001413	hsa-miR-20b	4005	LMO2	LIM domain only 2 (rhombotin-like 1)	1391	0.118598	709	0.0577176
MIMAT0001413	hsa-miR-20b	4217	MAP3K5	mitogen-activated protein kinase kinase kinase 5	1391	0.118598	709	0.0577176
MIMAT0001413	hsa-miR-20b	4313	MMP2	matrix metallopeptidase 2 (gelatinase A, 72kDa gelatinase, 72kDa type IV collagenase)	1391	0.118598	709	0.0577176
MIMAT0001413	hsa-miR-20b	4478	MSN	moesin	1391	0.118598	709	0.0577176
MIMAT0001413	hsa-miR-20b	4481	MSR1	macrophage scavenger receptor 1	1391	0.118598	709	0.0577176
MIMAT0001413	hsa-miR-20b	4638	MYLK	myosin light chain kinase	1391	0.118598	709	0.0577176
MIMAT0001413	hsa-miR-20b	50863	NTM	neurotrimin	1391	0.118598	709	0.0577176
MIMAT0001413	hsa-miR-20b	51474	LIMA1	LIM domain and actin binding 1	1391	0.118598	709	0.0577176
MIMAT0001413	hsa-miR-20b	5396	PRRX1	paired related homeobox 1	1391	0.118598	709	0.0577176
MIMAT0001413	hsa-miR-20b	54518	APBB1IP	amyloid beta (A4) precursor protein-binding, family B, member 1 interacting protein	1391	0.118598	709	0.0577176
MIMAT0001413	hsa-miR-20b	54704	PDP1	protein phosphatase 2C, magnesium-dependent, catalytic subunit	1391	0.118598	709	0.0577176
MIMAT0001413	hsa-miR-20b	54832	VPS13C	vacuolar protein sorting 13 homolog C (S. cerevisiae)	1391	0.118598	709	0.0577176
MIMAT0001413	hsa-miR-20b	55083	KIF26B	kinesin family member 26B	1391	0.118598	709	0.0577176
MIMAT0001413	hsa-miR-20b	55353	LAPTM4B	lysosomal associated protein transmembrane 4 beta	1391	0.118598	709	0.0577176
MIMAT0001413	hsa-miR-20b	55365	TMEM176A	transmembrane protein 176A	1391	0.118598	709	0.0577176
MIMAT0001413	hsa-miR-20b	55450	CAMK2N1	calcium/calmodulin-dependent protein kinase II inhibitor 1	1391	0.118598	709	0.0577176
MIMAT0001413	hsa-miR-20b	55803	ADAP2	centaurin, alpha 2	1391	0.118598	709	0.0577176
MIMAT0001413	hsa-miR-20b	55841	WWC3	WWC family member 3	1391	0.118598	709	0.0577176
MIMAT0001413	hsa-miR-20b	5650	KLK7	kallikrein-related peptidase 7	1391	0.118598	709	0.0577176
MIMAT0001413	hsa-miR-20b	57205	ATP10D	ATPase, class V, type 10D	1391	0.118598	709	0.0577176
MIMAT0001413	hsa-miR-20b	57419	SLC24A3	solute carrier family 24 (sodium/potassium/calcium exchanger), member 3	1391	0.118598	709	0.0577176
MIMAT0001413	hsa-miR-20b	57493	HEG1	HEG homolog 1 (zebrafish)	1391	0.118598	709	0.0577176
MIMAT0001413	hsa-miR-20b	5999	RGS4	regulator of G-protein signaling 4	1391	0.118598	709	0.0577176
MIMAT0001413	hsa-miR-20b	6387	CXCL12	chemokine (C-X-C motif) ligand 12 (stromal cell-derived factor 1)	1391	0.118598	709	0.0577176
MIMAT0001413	hsa-miR-20b	6444	SGCD	sarcoglycan, delta (35kDa dystrophin-associated glycoprotein)	1391	0.118598	709	0.0577176
MIMAT0001413	hsa-miR-20b	6653	SORL1	sortilin-related receptor, L(DLR class) A repeats-containing	1391	0.118598	709	0.0577176
MIMAT0001413	hsa-miR-20b	7048	TGFBR2	transforming growth factor, beta receptor II (70/80kDa)	1391	0.118598	709	0.0577176
MIMAT0001413	hsa-miR-20b	7057	THBS1	thrombospondin 1	1391	0.118598	709	0.0577176
MIMAT0001413	hsa-miR-20b	7071	KLF10	Kruppel-like factor 10	1391	0.118598	709	0.0577176
MIMAT0001413	hsa-miR-20b	7078	TIMP3	TIMP metallopeptidase inhibitor 3 (Sorsby fundus dystrophy, pseudoinflammatory)	1391	0.118598	709	0.0577176
MIMAT0001413	hsa-miR-20b	7456	WIPF1	WAS/WASL interacting protein family, member 1	1391	0.118598	709	0.0577176
MIMAT0001413	hsa-miR-20b	775	CACNA1C	calcium channel, voltage-dependent, L type, alpha 1C subunit	1391	0.118598	709	0.0577176
MIMAT0001413	hsa-miR-20b	800	CALD1	caldesmon 1	1391	0.118598	709	0.0577176
MIMAT0001413	hsa-miR-20b	8038	ADAM12	ADAM metallopeptidase domain 12 (meltrin alpha)	1391	0.118598	709	0.0577176
MIMAT0001413	hsa-miR-20b	8483	CILP	cartilage intermediate layer protein, nucleotide pyrophosphohydrolase	1391	0.118598	709	0.0577176
MIMAT0001413	hsa-miR-20b	860	RUNX2	runt-related transcription factor 2	1391	0.118598	709	0.0577176
MIMAT0001413	hsa-miR-20b	861	RUNX1	runt-related transcription factor 1 (acute myeloid leukemia 1; aml1 oncogene)	1391	0.118598	709	0.0577176
MIMAT0001413	hsa-miR-20b	8828	NRP2	neuropilin 2	1391	0.118598	709	0.0577176
MIMAT0001413	hsa-miR-20b	8850	KAT2B	p300/CBP-associated factor	1391	0.118598	709	0.0577176
MIMAT0001413	hsa-miR-20b	8870	IER3	immediate early response 3	1391	0.118598	709	0.0577176
MIMAT0001413	hsa-miR-20b	9194	SLC16A7	solute carrier family 16, member 7 (monocarboxylic acid transporter 2)	1391	0.118598	709	0.0577176
MIMAT0001413	hsa-miR-20b	9262	STK17B	serine/threonine kinase 17b	1391	0.118598	709	0.0577176
MIMAT0001413	hsa-miR-20b	9547	CXCL14	chemokine (C-X-C motif) ligand 14	1391	0.118598	709	0.0577176
MIMAT0001413	hsa-miR-20b	9764	KIAA0513	KIAA0513	1391	0.118598	709	0.0577176
MIMAT0001413	hsa-miR-20b	9770	RASSF2	Ras association (RalGDS/AF-6) domain family member 2	1391	0.118598	709	0.0577176
MIMAT0001413	hsa-miR-20b	9890	LPPR4	plasticity related gene 1	1391	0.118598	709	0.0577176
MIMAT0001413	hsa-miR-20b	9891	NUAK1	NUAK family, SNF1-like kinase, 1	1391	0.118598	709	0.0577176
MIMAT0001413	hsa-miR-20b	9945	GFPT2	glutamine-fructose-6-phosphate transaminase 2	1391	0.118598	709	0.0577176
MIMAT0000072	hsa-miR-18a	10611	PDLIM5	PDZ and LIM domain 5	982	0.140632	145	0.00743834
MIMAT0000072	hsa-miR-18a	11098	PRSS23	protease, serine, 23	982	0.140632	145	0.00743834
MIMAT0000072	hsa-miR-18a	11326	VSIG4	V-set and immunoglobulin domain containing 4	982	0.140632	145	0.00743834
MIMAT0000072	hsa-miR-18a	115207	KCTD12	potassium channel tetramerisation domain containing 12	982	0.140632	145	0.00743834
MIMAT0000072	hsa-miR-18a	1264	CNN1	calponin 1, basic, smooth muscle	982	0.140632	145	0.00743834
MIMAT0000072	hsa-miR-18a	1316	KLF6	Kruppel-like factor 6	982	0.140632	145	0.00743834
MIMAT0000072	hsa-miR-18a	1490	CTGF	connective tissue growth factor	982	0.140632	145	0.00743834
MIMAT0000072	hsa-miR-18a	1809	DPYSL3	dihydropyrimidinase-like 3	982	0.140632	145	0.00743834
MIMAT0000072	hsa-miR-18a	185	AGTR1	angiotensin II receptor, type 1	982	0.140632	145	0.00743834
MIMAT0000072	hsa-miR-18a	1958	EGR1	early growth response 1	982	0.140632	145	0.00743834
MIMAT0000072	hsa-miR-18a	2115	ETV1	ets variant gene 1	982	0.140632	145	0.00743834
MIMAT0000072	hsa-miR-18a	2152	F3	coagulation factor III (thromboplastin, tissue factor)	982	0.140632	145	0.00743834
MIMAT0000072	hsa-miR-18a	2212	FCGR2A	Fc fragment of IgG, low affinity IIa, receptor (CD32)	982	0.140632	145	0.00743834
MIMAT0000072	hsa-miR-18a	2213	FCGR2B	Fc fragment of IgG, low affinity IIb, receptor (CD32)	982	0.140632	145	0.00743834
MIMAT0000072	hsa-miR-18a	23037	PDZD2	PDZ domain containing 2	982	0.140632	145	0.00743834
MIMAT0000072	hsa-miR-18a	23499	MACF1	microtubule-actin crosslinking factor 1	982	0.140632	145	0.00743834
MIMAT0000072	hsa-miR-18a	23670	TMEM2	transmembrane protein 2	982	0.140632	145	0.00743834
MIMAT0000072	hsa-miR-18a	26508	HEYL	hairy/enhancer-of-split related with YRPW motif-like	982	0.140632	145	0.00743834
MIMAT0000072	hsa-miR-18a	27242	TNFRSF21	tumor necrosis factor receptor superfamily, member 21	982	0.140632	145	0.00743834
MIMAT0000072	hsa-miR-18a	313	AOAH	acyloxyacyl hydrolase (neutrophil)	982	0.140632	145	0.00743834
MIMAT0000072	hsa-miR-18a	3479	IGF1	insulin-like growth factor 1 (somatomedin C)	982	0.140632	145	0.00743834
MIMAT0000072	hsa-miR-18a	3556	IL1RAP	interleukin 1 receptor accessory protein	982	0.140632	145	0.00743834
MIMAT0000072	hsa-miR-18a	3790	KCNS3	potassium voltage-gated channel, delayed-rectifier, subfamily S, member 3	982	0.140632	145	0.00743834
MIMAT0000072	hsa-miR-18a	4005	LMO2	LIM domain only 2 (rhombotin-like 1)	982	0.140632	145	0.00743834
MIMAT0000072	hsa-miR-18a	4208	MEF2C	myocyte enhancer factor 2C	982	0.140632	145	0.00743834
MIMAT0000072	hsa-miR-18a	4313	MMP2	matrix metallopeptidase 2 (gelatinase A, 72kDa gelatinase, 72kDa type IV collagenase)	982	0.140632	145	0.00743834
MIMAT0000072	hsa-miR-18a	4638	MYLK	myosin light chain kinase	982	0.140632	145	0.00743834
MIMAT0000072	hsa-miR-18a	4973	OLR1	oxidized low density lipoprotein (lectin-like) receptor 1	982	0.140632	145	0.00743834
MIMAT0000072	hsa-miR-18a	50863	NTM	neurotrimin	982	0.140632	145	0.00743834
MIMAT0000072	hsa-miR-18a	51474	LIMA1	LIM domain and actin binding 1	982	0.140632	145	0.00743834
MIMAT0000072	hsa-miR-18a	5358	PLS3	plastin 3 (T isoform)	982	0.140632	145	0.00743834
MIMAT0000072	hsa-miR-18a	5396	PRRX1	paired related homeobox 1	982	0.140632	145	0.00743834
MIMAT0000072	hsa-miR-18a	55450	CAMK2N1	calcium/calmodulin-dependent protein kinase II inhibitor 1	982	0.140632	145	0.00743834
MIMAT0000072	hsa-miR-18a	55803	ADAP2	centaurin, alpha 2	982	0.140632	145	0.00743834
MIMAT0000072	hsa-miR-18a	5655	KLK10	kallikrein-related peptidase 10	982	0.140632	145	0.00743834
MIMAT0000072	hsa-miR-18a	5732	PTGER2	prostaglandin E receptor 2 (subtype EP2), 53kDa	982	0.140632	145	0.00743834
MIMAT0000072	hsa-miR-18a	57493	HEG1	HEG homolog 1 (zebrafish)	982	0.140632	145	0.00743834
MIMAT0000072	hsa-miR-18a	5788	PTPRC	protein tyrosine phosphatase, receptor type, C	982	0.140632	145	0.00743834
MIMAT0000072	hsa-miR-18a	5999	RGS4	regulator of G-protein signaling 4	982	0.140632	145	0.00743834
MIMAT0000072	hsa-miR-18a	6253	RTN2	reticulon 2	982	0.140632	145	0.00743834
MIMAT0000072	hsa-miR-18a	64131	XYLT1	xylosyltransferase I	982	0.140632	145	0.00743834
MIMAT0000072	hsa-miR-18a	6444	SGCD	sarcoglycan, delta (35kDa dystrophin-associated glycoprotein)	982	0.140632	145	0.00743834
MIMAT0000072	hsa-miR-18a	6515	SLC2A3	solute carrier family 2 (facilitated glucose transporter), member 3	982	0.140632	145	0.00743834
MIMAT0000072	hsa-miR-18a	6653	SORL1	sortilin-related receptor, L(DLR class) A repeats-containing	982	0.140632	145	0.00743834
MIMAT0000072	hsa-miR-18a	7057	THBS1	thrombospondin 1	982	0.140632	145	0.00743834
MIMAT0000072	hsa-miR-18a	7162	TPBG	trophoblast glycoprotein	982	0.140632	145	0.00743834
MIMAT0000072	hsa-miR-18a	7456	WIPF1	WAS/WASL interacting protein family, member 1	982	0.140632	145	0.00743834
MIMAT0000072	hsa-miR-18a	80176	SPSB1	splA/ryanodine receptor domain and SOCS box containing 1	982	0.140632	145	0.00743834
MIMAT0000072	hsa-miR-18a	80301	PLEKHO2	pleckstrin homology domain containing, family O member 2	982	0.140632	145	0.00743834
MIMAT0000072	hsa-miR-18a	83988	NCALD	neurocalcin delta	982	0.140632	145	0.00743834
MIMAT0000072	hsa-miR-18a	9071	CLDN10	claudin 10	982	0.140632	145	0.00743834
MIMAT0000072	hsa-miR-18a	9262	STK17B	serine/threonine kinase 17b	982	0.140632	145	0.00743834
MIMAT0000072	hsa-miR-18a	9764	KIAA0513	KIAA0513	982	0.140632	145	0.00743834
MIMAT0000072	hsa-miR-18a	9770	RASSF2	Ras association (RalGDS/AF-6) domain family member 2	982	0.140632	145	0.00743834
MIMAT0000072	hsa-miR-18a	9843	HEPH	hephaestin	982	0.140632	145	0.00743834
MIMAT0000072	hsa-miR-18a	9844	ELMO1	engulfment and cell motility 1	982	0.140632	145	0.00743834
MIMAT0000072	hsa-miR-18a	9890	LPPR4	plasticity related gene 1	982	0.140632	145	0.00743834
MIMAT0000072	hsa-miR-18a	9891	NUAK1	NUAK family, SNF1-like kinase, 1	982	0.140632	145	0.00743834
MIMAT0000095	hsa-miR-96	10659	CELF2	CUG triplet repeat, RNA binding protein 2	849	0.167095	589	0.322325
MIMAT0000095	hsa-miR-96	1278	COL1A2	collagen, type I, alpha 2	849	0.167095	589	0.322325
MIMAT0000095	hsa-miR-96	1296	COL8A2	collagen, type VIII, alpha 2	849	0.167095	589	0.322325
MIMAT0000095	hsa-miR-96	1301	COL11A1	collagen, type XI, alpha 1	849	0.167095	589	0.322325
MIMAT0000095	hsa-miR-96	1827	RCAN1	regulator of calcineurin 1	849	0.167095	589	0.322325
MIMAT0000095	hsa-miR-96	2012	EMP1	epithelial membrane protein 1	849	0.167095	589	0.322325
MIMAT0000095	hsa-miR-96	2335	FN1	fibronectin 1	849	0.167095	589	0.322325
MIMAT0000095	hsa-miR-96	2533	FYB	FYN binding protein (FYB-120/130)	849	0.167095	589	0.322325
MIMAT0000095	hsa-miR-96	259230	SGMS1	sphingomyelin synthase 1	849	0.167095	589	0.322325
MIMAT0000095	hsa-miR-96	25960	GPR124	G protein-coupled receptor 124	849	0.167095	589	0.322325
MIMAT0000095	hsa-miR-96	2702	GJA5	gap junction protein, alpha 5, 40kDa	849	0.167095	589	0.322325
MIMAT0000095	hsa-miR-96	27253	PCDH17	protocadherin 17	849	0.167095	589	0.322325
MIMAT0000095	hsa-miR-96	313	AOAH	acyloxyacyl hydrolase (neutrophil)	849	0.167095	589	0.322325
MIMAT0000095	hsa-miR-96	3202	HOXA5	homeobox A5	849	0.167095	589	0.322325
MIMAT0000095	hsa-miR-96	3371	TNC	tenascin C (hexabrachion)	849	0.167095	589	0.322325
MIMAT0000095	hsa-miR-96	3479	IGF1	insulin-like growth factor 1 (somatomedin C)	849	0.167095	589	0.322325
MIMAT0000095	hsa-miR-96	3587	IL10RA	interleukin 10 receptor, alpha	849	0.167095	589	0.322325
MIMAT0000095	hsa-miR-96	3685	ITGAV	integrin, alpha V (vitronectin receptor, alpha polypeptide, antigen CD51)	849	0.167095	589	0.322325
MIMAT0000095	hsa-miR-96	3936	LCP1	lymphocyte cytosolic protein 1 (L-plastin)	849	0.167095	589	0.322325
MIMAT0000095	hsa-miR-96	4000	LMNA	lamin A/C	849	0.167095	589	0.322325
MIMAT0000095	hsa-miR-96	4053	LTBP2	latent transforming growth factor beta binding protein 2	849	0.167095	589	0.322325
MIMAT0000095	hsa-miR-96	4478	MSN	moesin	849	0.167095	589	0.322325
MIMAT0000095	hsa-miR-96	4973	OLR1	oxidized low density lipoprotein (lectin-like) receptor 1	849	0.167095	589	0.322325
MIMAT0000095	hsa-miR-96	5328	PLAU	plasminogen activator, urokinase	849	0.167095	589	0.322325
MIMAT0000095	hsa-miR-96	5396	PRRX1	paired related homeobox 1	849	0.167095	589	0.322325
MIMAT0000095	hsa-miR-96	54210	TREM1	triggering receptor expressed on myeloid cells 1	849	0.167095	589	0.322325
MIMAT0000095	hsa-miR-96	55450	CAMK2N1	calcium/calmodulin-dependent protein kinase II inhibitor 1	849	0.167095	589	0.322325
MIMAT0000095	hsa-miR-96	56062	KLHL4	kelch-like 4 (Drosophila)	849	0.167095	589	0.322325
MIMAT0000095	hsa-miR-96	56937	PMEPA1	prostate transmembrane protein, androgen induced 1	849	0.167095	589	0.322325
MIMAT0000095	hsa-miR-96	57124	CD248	CD248 molecule, endosialin	849	0.167095	589	0.322325
MIMAT0000095	hsa-miR-96	5743	PTGS2	prostaglandin-endoperoxide synthase 2 (prostaglandin G/H synthase and cyclooxygenase)	849	0.167095	589	0.322325
MIMAT0000095	hsa-miR-96	58488	PCTP	phosphatidylcholine transfer protein	849	0.167095	589	0.322325
MIMAT0000095	hsa-miR-96	5997	RGS2	regulator of G-protein signaling 2, 24kDa	849	0.167095	589	0.322325
MIMAT0000095	hsa-miR-96	64236	PDLIM2	PDZ and LIM domain 2 (mystique)	849	0.167095	589	0.322325
MIMAT0000095	hsa-miR-96	667	DST	dystonin	849	0.167095	589	0.322325
MIMAT0000095	hsa-miR-96	6867	TACC1	transforming, acidic coiled-coil containing protein 1	849	0.167095	589	0.322325
MIMAT0000095	hsa-miR-96	7078	TIMP3	TIMP metallopeptidase inhibitor 3 (Sorsby fundus dystrophy, pseudoinflammatory)	849	0.167095	589	0.322325
MIMAT0000095	hsa-miR-96	7168	TPM1	tropomyosin 1 (alpha)	849	0.167095	589	0.322325
MIMAT0000095	hsa-miR-96	7169	TPM2	tropomyosin 2 (beta)	849	0.167095	589	0.322325
MIMAT0000095	hsa-miR-96	7291	TWIST1	twist homolog 1 (acrocephalosyndactyly 3; Saethre-Chotzen syndrome) (Drosophila)	849	0.167095	589	0.322325
MIMAT0000095	hsa-miR-96	775	CACNA1C	calcium channel, voltage-dependent, L type, alpha 1C subunit	849	0.167095	589	0.322325
MIMAT0000095	hsa-miR-96	800	CALD1	caldesmon 1	849	0.167095	589	0.322325
MIMAT0000095	hsa-miR-96	80176	SPSB1	splA/ryanodine receptor domain and SOCS box containing 1	849	0.167095	589	0.322325
MIMAT0000095	hsa-miR-96	84159	ARID5B	AT rich interactive domain 5B (MRF1-like)	849	0.167095	589	0.322325
MIMAT0000095	hsa-miR-96	860	RUNX2	runt-related transcription factor 2	849	0.167095	589	0.322325
MIMAT0000095	hsa-miR-96	861	RUNX1	runt-related transcription factor 1 (acute myeloid leukemia 1; aml1 oncogene)	849	0.167095	589	0.322325
MIMAT0000095	hsa-miR-96	9194	SLC16A7	solute carrier family 16, member 7 (monocarboxylic acid transporter 2)	849	0.167095	589	0.322325
MIMAT0000095	hsa-miR-96	9839	ZEB2	zinc finger E-box binding homeobox 2	849	0.167095	589	0.322325
MIMAT0000095	hsa-miR-96	9890	LPPR4	plasticity related gene 1	849	0.167095	589	0.322325
MIMAT0000095	hsa-miR-96	9976	CLEC2B	C-type lectin domain family 2, member B	849	0.167095	589	0.322325
MIMAT0000424	hsa-miR-128	10417	SPON2	spondin 2, extracellular matrix protein	916	0.19269	602	0.143225
MIMAT0000424	hsa-miR-128	10516	FBLN5	fibulin 5	916	0.19269	602	0.143225
MIMAT0000424	hsa-miR-128	10630	PDPN	podoplanin	916	0.19269	602	0.143225
MIMAT0000424	hsa-miR-128	112399	EGLN3	egl nine homolog 3 (C. elegans)	916	0.19269	602	0.143225
MIMAT0000424	hsa-miR-128	1230	CCR1	chemokine (C-C motif) receptor 1	916	0.19269	602	0.143225
MIMAT0000424	hsa-miR-128	1281	COL3A1	collagen, type III, alpha 1 (Ehlers-Danlos syndrome type IV, autosomal dominant)	916	0.19269	602	0.143225
MIMAT0000424	hsa-miR-128	1290	COL5A2	collagen, type V, alpha 2	916	0.19269	602	0.143225
MIMAT0000424	hsa-miR-128	1536	CYBB	cytochrome b-245, beta polypeptide (chronic granulomatous disease)	916	0.19269	602	0.143225
MIMAT0000424	hsa-miR-128	1960	EGR3	early growth response 3	916	0.19269	602	0.143225
MIMAT0000424	hsa-miR-128	2152	F3	coagulation factor III (thromboplastin, tissue factor)	916	0.19269	602	0.143225
MIMAT0000424	hsa-miR-128	2209	FCGR1A	Fc fragment of IgG, high affinity Ia, receptor (CD64)	916	0.19269	602	0.143225
MIMAT0000424	hsa-miR-128	2246	FGF1	fibroblast growth factor 1 (acidic)	916	0.19269	602	0.143225
MIMAT0000424	hsa-miR-128	2252	FGF7	fibroblast growth factor 7 (keratinocyte growth factor)	916	0.19269	602	0.143225
MIMAT0000424	hsa-miR-128	23167	EFR3A	EFR3 homolog A (S. cerevisiae)	916	0.19269	602	0.143225
MIMAT0000424	hsa-miR-128	240	ALOX5	arachidonate 5-lipoxygenase	916	0.19269	602	0.143225
MIMAT0000424	hsa-miR-128	259230	SGMS1	sphingomyelin synthase 1	916	0.19269	602	0.143225
MIMAT0000424	hsa-miR-128	26353	HSPB8	heat shock 22kDa protein 8	916	0.19269	602	0.143225
MIMAT0000424	hsa-miR-128	26585	GREM1	gremlin 1, cysteine knot superfamily, homolog (Xenopus laevis)	916	0.19269	602	0.143225
MIMAT0000424	hsa-miR-128	27295	PDLIM3	PDZ and LIM domain 3	916	0.19269	602	0.143225
MIMAT0000424	hsa-miR-128	3479	IGF1	insulin-like growth factor 1 (somatomedin C)	916	0.19269	602	0.143225
MIMAT0000424	hsa-miR-128	3597	IL13RA1	interleukin 13 receptor, alpha 1	916	0.19269	602	0.143225
MIMAT0000424	hsa-miR-128	3678	ITGA5	integrin, alpha 5 (fibronectin receptor, alpha polypeptide)	916	0.19269	602	0.143225
MIMAT0000424	hsa-miR-128	3690	ITGB3	integrin, beta 3 (platelet glycoprotein IIIa, antigen CD61)	916	0.19269	602	0.143225
MIMAT0000424	hsa-miR-128	389136	VGLL3	vestigial like 3 (Drosophila)	916	0.19269	602	0.143225
MIMAT0000424	hsa-miR-128	4053	LTBP2	latent transforming growth factor beta binding protein 2	916	0.19269	602	0.143225
MIMAT0000424	hsa-miR-128	4060	LUM	lumican	916	0.19269	602	0.143225
MIMAT0000424	hsa-miR-128	5328	PLAU	plasminogen activator, urokinase	916	0.19269	602	0.143225
MIMAT0000424	hsa-miR-128	55353	LAPTM4B	lysosomal associated protein transmembrane 4 beta	916	0.19269	602	0.143225
MIMAT0000424	hsa-miR-128	5732	PTGER2	prostaglandin E receptor 2 (subtype EP2), 53kDa	916	0.19269	602	0.143225
MIMAT0000424	hsa-miR-128	5743	PTGS2	prostaglandin-endoperoxide synthase 2 (prostaglandin G/H synthase and cyclooxygenase)	916	0.19269	602	0.143225
MIMAT0000424	hsa-miR-128	5791	PTPRE	protein tyrosine phosphatase, receptor type, E	916	0.19269	602	0.143225
MIMAT0000424	hsa-miR-128	58488	PCTP	phosphatidylcholine transfer protein	916	0.19269	602	0.143225
MIMAT0000424	hsa-miR-128	5997	RGS2	regulator of G-protein signaling 2, 24kDa	916	0.19269	602	0.143225
MIMAT0000424	hsa-miR-128	6319	SCD	stearoyl-CoA desaturase (delta-9-desaturase)	916	0.19269	602	0.143225
MIMAT0000424	hsa-miR-128	6387	CXCL12	chemokine (C-X-C motif) ligand 12 (stromal cell-derived factor 1)	916	0.19269	602	0.143225
MIMAT0000424	hsa-miR-128	64231	MS4A6A	membrane-spanning 4-domains, subfamily A, member 6A	916	0.19269	602	0.143225
MIMAT0000424	hsa-miR-128	64388	GREM2	gremlin 2, cysteine knot superfamily, homolog (Xenopus laevis)	916	0.19269	602	0.143225
MIMAT0000424	hsa-miR-128	6444	SGCD	sarcoglycan, delta (35kDa dystrophin-associated glycoprotein)	916	0.19269	602	0.143225
MIMAT0000424	hsa-miR-128	6503	SLA	Src-like-adaptor	916	0.19269	602	0.143225
MIMAT0000424	hsa-miR-128	6515	SLC2A3	solute carrier family 2 (facilitated glucose transporter), member 3	916	0.19269	602	0.143225
MIMAT0000424	hsa-miR-128	6867	TACC1	transforming, acidic coiled-coil containing protein 1	916	0.19269	602	0.143225
MIMAT0000424	hsa-miR-128	7168	TPM1	tropomyosin 1 (alpha)	916	0.19269	602	0.143225
MIMAT0000424	hsa-miR-128	79974	C7orf58	chromosome 7 open reading frame 58	916	0.19269	602	0.143225
MIMAT0000424	hsa-miR-128	84159	ARID5B	AT rich interactive domain 5B (MRF1-like)	916	0.19269	602	0.143225
MIMAT0000424	hsa-miR-128	8742	TNFSF12	tumor necrosis factor (ligand) superfamily, member 12	916	0.19269	602	0.143225
MIMAT0000424	hsa-miR-128	8828	NRP2	neuropilin 2	916	0.19269	602	0.143225
MIMAT0000424	hsa-miR-128	8829	NRP1	neuropilin 1	916	0.19269	602	0.143225
MIMAT0000424	hsa-miR-128	9208	LRRFIP1	leucine rich repeat (in FLII) interacting protein 1	916	0.19269	602	0.143225
MIMAT0000424	hsa-miR-128	92140	MTDH	metadherin	916	0.19269	602	0.143225
MIMAT0000424	hsa-miR-128	9459	ARHGEF6	Rac/Cdc42 guanine nucleotide exchange factor (GEF) 6	916	0.19269	602	0.143225
MIMAT0000424	hsa-miR-128	9844	ELMO1	engulfment and cell motility 1	916	0.19269	602	0.143225
MIMAT0000424	hsa-miR-128	9910	RABGAP1L	RAB GTPase activating protein 1-like	916	0.19269	602	0.143225
MIMAT0000424	hsa-miR-128	9945	GFPT2	glutamine-fructose-6-phosphate transaminase 2	916	0.19269	602	0.143225
MIMAT0000417	hsa-miR-15b	1009	CDH11	cadherin 11, type 2, OB-cadherin (osteoblast)	1455	NS	718	NS
MIMAT0000417	hsa-miR-15b	10611	PDLIM5	PDZ and LIM domain 5	1455	NS	718	NS
MIMAT0000417	hsa-miR-15b	10659	CELF2	CUG triplet repeat, RNA binding protein 2	1455	NS	718	NS
MIMAT0000417	hsa-miR-15b	11059	WWP1	WW domain containing E3 ubiquitin protein ligase 1	1455	NS	718	NS
MIMAT0000417	hsa-miR-15b	1230	CCR1	chemokine (C-C motif) receptor 1	1455	NS	718	NS
MIMAT0000417	hsa-miR-15b	1264	CNN1	calponin 1, basic, smooth muscle	1455	NS	718	NS
MIMAT0000417	hsa-miR-15b	131578	LRRC15	leucine rich repeat containing 15	1455	NS	718	NS
MIMAT0000417	hsa-miR-15b	1536	CYBB	cytochrome b-245, beta polypeptide (chronic granulomatous disease)	1455	NS	718	NS
MIMAT0000417	hsa-miR-15b	1805	DPT	dermatopontin	1455	NS	718	NS
MIMAT0000417	hsa-miR-15b	1836	SLC26A2	solute carrier family 26 (sulfate transporter), member 2	1455	NS	718	NS
MIMAT0000417	hsa-miR-15b	1960	EGR3	early growth response 3	1455	NS	718	NS
MIMAT0000417	hsa-miR-15b	2115	ETV1	ets variant gene 1	1455	NS	718	NS
MIMAT0000417	hsa-miR-15b	2180	ACSL1	acyl-CoA synthetase long-chain family member 1	1455	NS	718	NS
MIMAT0000417	hsa-miR-15b	220	ALDH1A3	aldehyde dehydrogenase 1 family, member A3	1455	NS	718	NS
MIMAT0000417	hsa-miR-15b	2252	FGF7	fibroblast growth factor 7 (keratinocyte growth factor)	1455	NS	718	NS
MIMAT0000417	hsa-miR-15b	23102	TBC1D2B	TBC1 domain family, member 2B	1455	NS	718	NS
MIMAT0000417	hsa-miR-15b	23345	SYNE1	spectrin repeat containing, nuclear envelope 1	1455	NS	718	NS
MIMAT0000417	hsa-miR-15b	23499	MACF1	microtubule-actin crosslinking factor 1	1455	NS	718	NS
MIMAT0000417	hsa-miR-15b	23508	TTC9	tetratricopeptide repeat domain 9	1455	NS	718	NS
MIMAT0000417	hsa-miR-15b	23531	MMD	monocyte to macrophage differentiation-associated	1455	NS	718	NS
MIMAT0000417	hsa-miR-15b	2568	GABRP	gamma-aminobutyric acid (GABA) A receptor, pi	1455	NS	718	NS
MIMAT0000417	hsa-miR-15b	26056	RAB11FIP5	RAB11 family interacting protein 5 (class I)	1455	NS	718	NS
MIMAT0000417	hsa-miR-15b	2702	GJA5	gap junction protein, alpha 5, 40kDa	1455	NS	718	NS
MIMAT0000417	hsa-miR-15b	27253	PCDH17	protocadherin 17	1455	NS	718	NS
MIMAT0000417	hsa-miR-15b	3726	JUNB	jun B proto-oncogene	1455	NS	718	NS
MIMAT0000417	hsa-miR-15b	389136	VGLL3	vestigial like 3 (Drosophila)	1455	NS	718	NS
MIMAT0000417	hsa-miR-15b	3936	LCP1	lymphocyte cytosolic protein 1 (L-plastin)	1455	NS	718	NS
MIMAT0000417	hsa-miR-15b	4320	MMP11	matrix metallopeptidase 11 (stromelysin 3)	1455	NS	718	NS
MIMAT0000417	hsa-miR-15b	4478	MSN	moesin	1455	NS	718	NS
MIMAT0000417	hsa-miR-15b	4638	MYLK	myosin light chain kinase	1455	NS	718	NS
MIMAT0000417	hsa-miR-15b	51703	ACSL5	acyl-CoA synthetase long-chain family member 5	1455	NS	718	NS
MIMAT0000417	hsa-miR-15b	5328	PLAU	plasminogen activator, urokinase	1455	NS	718	NS
MIMAT0000417	hsa-miR-15b	5396	PRRX1	paired related homeobox 1	1455	NS	718	NS
MIMAT0000417	hsa-miR-15b	54629	FAM63B	family with sequence similarity 63, member B	1455	NS	718	NS
MIMAT0000417	hsa-miR-15b	54704	PDP1	protein phosphatase 2C, magnesium-dependent, catalytic subunit	1455	NS	718	NS
MIMAT0000417	hsa-miR-15b	5552	SRGN	serglycin	1455	NS	718	NS
MIMAT0000417	hsa-miR-15b	5791	PTPRE	protein tyrosine phosphatase, receptor type, E	1455	NS	718	NS
MIMAT0000417	hsa-miR-15b	6303	SAT1	spermidine/spermine N1-acetyltransferase 1	1455	NS	718	NS
MIMAT0000417	hsa-miR-15b	64131	XYLT1	xylosyltransferase I	1455	NS	718	NS
MIMAT0000417	hsa-miR-15b	64388	GREM2	gremlin 2, cysteine knot superfamily, homolog (Xenopus laevis)	1455	NS	718	NS
MIMAT0000417	hsa-miR-15b	6444	SGCD	sarcoglycan, delta (35kDa dystrophin-associated glycoprotein)	1455	NS	718	NS
MIMAT0000417	hsa-miR-15b	6446	SGK1	serum/glucocorticoid regulated kinase 1	1455	NS	718	NS
MIMAT0000417	hsa-miR-15b	6515	SLC2A3	solute carrier family 2 (facilitated glucose transporter), member 3	1455	NS	718	NS
MIMAT0000417	hsa-miR-15b	6533	SLC6A6	solute carrier family 6 (neurotransmitter transporter, taurine), member 6	1455	NS	718	NS
MIMAT0000417	hsa-miR-15b	7078	TIMP3	TIMP metallopeptidase inhibitor 3 (Sorsby fundus dystrophy, pseudoinflammatory)	1455	NS	718	NS
MIMAT0000417	hsa-miR-15b	713	C1QB	complement component 1, q subcomponent, B chain	1455	NS	718	NS
MIMAT0000417	hsa-miR-15b	7169	TPM2	tropomyosin 2 (beta)	1455	NS	718	NS
MIMAT0000417	hsa-miR-15b	7412	VCAM1	vascular cell adhesion molecule 1	1455	NS	718	NS
MIMAT0000417	hsa-miR-15b	794	CALB2	calbindin 2	1455	NS	718	NS
MIMAT0000417	hsa-miR-15b	79987	SVEP1	sushi, von Willebrand factor type A, EGF and pentraxin domain containing 1	1455	NS	718	NS
MIMAT0000417	hsa-miR-15b	8076	MFAP5	microfibrillar associated protein 5	1455	NS	718	NS
MIMAT0000417	hsa-miR-15b	8321	FZD1	frizzled homolog 1 (Drosophila)	1455	NS	718	NS
MIMAT0000417	hsa-miR-15b	8406	SRPX	sushi-repeat-containing protein, X-linked	1455	NS	718	NS
MIMAT0000417	hsa-miR-15b	8553	BHLHE40	basic helix-loop-helix domain containing, class B, 2	1455	NS	718	NS
MIMAT0000417	hsa-miR-15b	862	RUNX1T1	runt-related transcription factor 1; translocated to, 1 (cyclin D-related)	1455	NS	718	NS
MIMAT0000417	hsa-miR-15b	8826	IQGAP1	IQ motif containing GTPase activating protein 1	1455	NS	718	NS
MIMAT0000417	hsa-miR-15b	8828	NRP2	neuropilin 2	1455	NS	718	NS
MIMAT0000417	hsa-miR-15b	90993	CREB3L1	cAMP responsive element binding protein 3-like 1	1455	NS	718	NS
MIMAT0000417	hsa-miR-15b	9516	LITAF	lipopolysaccharide-induced TNF factor	1455	NS	718	NS
MIMAT0000417	hsa-miR-15b	962	CD48	CD48 molecule	1455	NS	718	NS
MIMAT0000417	hsa-miR-15b	9766	KIAA0247	KIAA0247	1455	NS	718	NS
MIMAT0000417	hsa-miR-15b	9843	HEPH	hephaestin	1455	NS	718	NS
MIMAT0000417	hsa-miR-15b	9890	LPPR4	plasticity related gene 1	1455	NS	718	NS
MIMAT0000417	hsa-miR-15b	9891	NUAK1	NUAK family, SNF1-like kinase, 1	1455	NS	718	NS
MIMAT0000688	hsa-miR-301a	1009	CDH11	cadherin 11, type 2, OB-cadherin (osteoblast)	1438	NS	546	0.13793
MIMAT0000688	hsa-miR-301a	10186	LHFP	lipoma HMGIC fusion partner	1438	NS	546	0.13793
MIMAT0000688	hsa-miR-301a	1026	CDKN1A	cyclin-dependent kinase inhibitor 1A (p21, Cip1)	1438	NS	546	0.13793
MIMAT0000688	hsa-miR-301a	10611	PDLIM5	PDZ and LIM domain 5	1438	NS	546	0.13793
MIMAT0000688	hsa-miR-301a	10631	POSTN	periostin, osteoblast specific factor	1438	NS	546	0.13793
MIMAT0000688	hsa-miR-301a	10659	CELF2	CUG triplet repeat, RNA binding protein 2	1438	NS	546	0.13793
MIMAT0000688	hsa-miR-301a	11059	WWP1	WW domain containing E3 ubiquitin protein ligase 1	1438	NS	546	0.13793
MIMAT0000688	hsa-miR-301a	112399	EGLN3	egl nine homolog 3 (C. elegans)	1438	NS	546	0.13793
MIMAT0000688	hsa-miR-301a	115207	KCTD12	potassium channel tetramerisation domain containing 12	1438	NS	546	0.13793
MIMAT0000688	hsa-miR-301a	1293	COL6A3	collagen, type VI, alpha 3	1438	NS	546	0.13793
MIMAT0000688	hsa-miR-301a	1513	CTSK	cathepsin K	1438	NS	546	0.13793
MIMAT0000688	hsa-miR-301a	1604	CD55	CD55 molecule, decay accelerating factor for complement (Cromer blood group)	1438	NS	546	0.13793
MIMAT0000688	hsa-miR-301a	1827	RCAN1	regulator of calcineurin 1	1438	NS	546	0.13793
MIMAT0000688	hsa-miR-301a	1958	EGR1	early growth response 1	1438	NS	546	0.13793
MIMAT0000688	hsa-miR-301a	1960	EGR3	early growth response 3	1438	NS	546	0.13793
MIMAT0000688	hsa-miR-301a	2152	F3	coagulation factor III (thromboplastin, tissue factor)	1438	NS	546	0.13793
MIMAT0000688	hsa-miR-301a	2180	ACSL1	acyl-CoA synthetase long-chain family member 1	1438	NS	546	0.13793
MIMAT0000688	hsa-miR-301a	23102	TBC1D2B	TBC1 domain family, member 2B	1438	NS	546	0.13793
MIMAT0000688	hsa-miR-301a	23213	SULF1	sulfatase 1	1438	NS	546	0.13793
MIMAT0000688	hsa-miR-301a	23313	C22orf9	chromosome 22 open reading frame 9	1438	NS	546	0.13793
MIMAT0000688	hsa-miR-301a	23601	CLEC5A	C-type lectin domain family 5, member A	1438	NS	546	0.13793
MIMAT0000688	hsa-miR-301a	23670	TMEM2	transmembrane protein 2	1438	NS	546	0.13793
MIMAT0000688	hsa-miR-301a	259230	SGMS1	sphingomyelin synthase 1	1438	NS	546	0.13793
MIMAT0000688	hsa-miR-301a	26353	HSPB8	heat shock 22kDa protein 8	1438	NS	546	0.13793
MIMAT0000688	hsa-miR-301a	2697	GJA1	gap junction protein, alpha 1, 43kDa	1438	NS	546	0.13793
MIMAT0000688	hsa-miR-301a	28959	TMEM176B	transmembrane protein 176B	1438	NS	546	0.13793
MIMAT0000688	hsa-miR-301a	29969	MDFIC	MyoD family inhibitor domain containing	1438	NS	546	0.13793
MIMAT0000688	hsa-miR-301a	3003	GZMK	granzyme K (granzyme 3; tryptase II)	1438	NS	546	0.13793
MIMAT0000688	hsa-miR-301a	3202	HOXA5	homeobox A5	1438	NS	546	0.13793
MIMAT0000688	hsa-miR-301a	3479	IGF1	insulin-like growth factor 1 (somatomedin C)	1438	NS	546	0.13793
MIMAT0000688	hsa-miR-301a	3556	IL1RAP	interleukin 1 receptor accessory protein	1438	NS	546	0.13793
MIMAT0000688	hsa-miR-301a	3685	ITGAV	integrin, alpha V (vitronectin receptor, alpha polypeptide, antigen CD51)	1438	NS	546	0.13793
MIMAT0000688	hsa-miR-301a	389136	VGLL3	vestigial like 3 (Drosophila)	1438	NS	546	0.13793
MIMAT0000688	hsa-miR-301a	4094	MAF	v-maf musculoaponeurotic fibrosarcoma oncogene homolog (avian)	1438	NS	546	0.13793
MIMAT0000688	hsa-miR-301a	4217	MAP3K5	mitogen-activated protein kinase kinase kinase 5	1438	NS	546	0.13793
MIMAT0000688	hsa-miR-301a	4316	MMP7	matrix metallopeptidase 7 (matrilysin, uterine)	1438	NS	546	0.13793
MIMAT0000688	hsa-miR-301a	5167	ENPP1	ectonucleotide pyrophosphatase/phosphodiesterase 1	1438	NS	546	0.13793
MIMAT0000688	hsa-miR-301a	5376	PMP22	peripheral myelin protein 22	1438	NS	546	0.13793
MIMAT0000688	hsa-miR-301a	5412	UBL3	ubiquitin-like 3	1438	NS	546	0.13793
MIMAT0000688	hsa-miR-301a	55033	FKBP14	FK506 binding protein 14, 22 kDa	1438	NS	546	0.13793
MIMAT0000688	hsa-miR-301a	55970	GNG12	guanine nucleotide binding protein (G protein), gamma 12	1438	NS	546	0.13793
MIMAT0000688	hsa-miR-301a	56062	KLHL4	kelch-like 4 (Drosophila)	1438	NS	546	0.13793
MIMAT0000688	hsa-miR-301a	56937	PMEPA1	prostate transmembrane protein, androgen induced 1	1438	NS	546	0.13793
MIMAT0000688	hsa-miR-301a	5732	PTGER2	prostaglandin E receptor 2 (subtype EP2), 53kDa	1438	NS	546	0.13793
MIMAT0000688	hsa-miR-301a	57419	SLC24A3	solute carrier family 24 (sodium/potassium/calcium exchanger), member 3	1438	NS	546	0.13793
MIMAT0000688	hsa-miR-301a	57493	HEG1	HEG homolog 1 (zebrafish)	1438	NS	546	0.13793
MIMAT0000688	hsa-miR-301a	5791	PTPRE	protein tyrosine phosphatase, receptor type, E	1438	NS	546	0.13793
MIMAT0000688	hsa-miR-301a	5873	RAB27A	RAB27A, member RAS oncogene family	1438	NS	546	0.13793
MIMAT0000688	hsa-miR-301a	6387	CXCL12	chemokine (C-X-C motif) ligand 12 (stromal cell-derived factor 1)	1438	NS	546	0.13793
MIMAT0000688	hsa-miR-301a	6446	SGK1	serum/glucocorticoid regulated kinase 1	1438	NS	546	0.13793
MIMAT0000688	hsa-miR-301a	6533	SLC6A6	solute carrier family 6 (neurotransmitter transporter, taurine), member 6	1438	NS	546	0.13793
MIMAT0000688	hsa-miR-301a	6695	SPOCK1	sparc/osteonectin, cwcv and kazal-like domains proteoglycan (testican) 1	1438	NS	546	0.13793
MIMAT0000688	hsa-miR-301a	7022	TFAP2C	transcription factor AP-2 gamma (activating enhancer binding protein 2 gamma)	1438	NS	546	0.13793
MIMAT0000688	hsa-miR-301a	7045	TGFBI	transforming growth factor, beta-induced, 68kDa	1438	NS	546	0.13793
MIMAT0000688	hsa-miR-301a	7048	TGFBR2	transforming growth factor, beta receptor II (70/80kDa)	1438	NS	546	0.13793
MIMAT0000688	hsa-miR-301a	7071	KLF10	Kruppel-like factor 10	1438	NS	546	0.13793
MIMAT0000688	hsa-miR-301a	7378	UPP1	uridine phosphorylase 1	1438	NS	546	0.13793
MIMAT0000688	hsa-miR-301a	775	CACNA1C	calcium channel, voltage-dependent, L type, alpha 1C subunit	1438	NS	546	0.13793
MIMAT0000688	hsa-miR-301a	7805	LAPTM5	lysosomal associated multispanning membrane protein 5	1438	NS	546	0.13793
MIMAT0000688	hsa-miR-301a	800	CALD1	caldesmon 1	1438	NS	546	0.13793
MIMAT0000688	hsa-miR-301a	8038	ADAM12	ADAM metallopeptidase domain 12 (meltrin alpha)	1438	NS	546	0.13793
MIMAT0000688	hsa-miR-301a	8406	SRPX	sushi-repeat-containing protein, X-linked	1438	NS	546	0.13793
MIMAT0000688	hsa-miR-301a	84159	ARID5B	AT rich interactive domain 5B (MRF1-like)	1438	NS	546	0.13793
MIMAT0000688	hsa-miR-301a	860	RUNX2	runt-related transcription factor 2	1438	NS	546	0.13793
MIMAT0000688	hsa-miR-301a	864	RUNX3	runt-related transcription factor 3	1438	NS	546	0.13793
MIMAT0000688	hsa-miR-301a	8828	NRP2	neuropilin 2	1438	NS	546	0.13793
MIMAT0000688	hsa-miR-301a	8829	NRP1	neuropilin 1	1438	NS	546	0.13793
MIMAT0000688	hsa-miR-301a	8850	KAT2B	p300/CBP-associated factor	1438	NS	546	0.13793
MIMAT0000688	hsa-miR-301a	9208	LRRFIP1	leucine rich repeat (in FLII) interacting protein 1	1438	NS	546	0.13793
MIMAT0000688	hsa-miR-301a	9645	MICAL2	microtubule associated monoxygenase, calponin and LIM domain containing 2	1438	NS	546	0.13793
MIMAT0000688	hsa-miR-301a	9839	ZEB2	zinc finger E-box binding homeobox 2	1438	NS	546	0.13793
MIMAT0000688	hsa-miR-301a	9935	MAFB	v-maf musculoaponeurotic fibrosarcoma oncogene homolog B (avian)	1438	NS	546	0.13793

## Sheet: gene_HIGH_C2_miR_LOW_C2
					Enrichment, miR targets within gene set (one-sided Fisher's exact)
miRNA accession	miRNA name	Gene ID	Gene Symbol	Gene Title	Miranda targets on entire array	Miranda, enrichment P-value	TargetScan targets on entire array	TargetScan, enrichment P-value
MIMAT0000752	hsa-miR-328	1021	CDK6	cyclin-dependent kinase 6	827	0.253838	74	0.017886
MIMAT0000752	hsa-miR-328	10894	LYVE1	lymphatic vessel endothelial hyaluronan receptor 1	827	0.253838	74	0.017886
MIMAT0000752	hsa-miR-328	11167	FSTL1	follistatin-like 1	827	0.253838	74	0.017886
MIMAT0000752	hsa-miR-328	150	ADRA2A	adrenergic, alpha-2A-, receptor	827	0.253838	74	0.017886
MIMAT0000752	hsa-miR-328	2006	ELN	elastin (supravalvular aortic stenosis, Williams-Beuren syndrome)	827	0.253838	74	0.017886
MIMAT0000752	hsa-miR-328	22891	ZNF365	zinc finger protein 365	827	0.253838	74	0.017886
MIMAT0000752	hsa-miR-328	23022	PALLD	palladin, cytoskeletal associated protein	827	0.253838	74	0.017886
MIMAT0000752	hsa-miR-328	25802	LMOD1	leiomodin 1 (smooth muscle)	827	0.253838	74	0.017886
MIMAT0000752	hsa-miR-328	4256	MGP	matrix Gla protein	827	0.253838	74	0.017886
MIMAT0000752	hsa-miR-328	4330	MN1	meningioma (disrupted in balanced translocation) 1	827	0.253838	74	0.017886
MIMAT0000752	hsa-miR-328	4345	CD200	CD200 molecule	827	0.253838	74	0.017886
MIMAT0000752	hsa-miR-328	5010	CLDN11	claudin 11 (oligodendrocyte transmembrane protein)	827	0.253838	74	0.017886
MIMAT0000752	hsa-miR-328	57134	MAN1C1	mannosidase, alpha, class 1C, member 1	827	0.253838	74	0.017886
MIMAT0000752	hsa-miR-328	7025	NR2F1	nuclear receptor subfamily 2, group F, member 1	827	0.253838	74	0.017886
MIMAT0000752	hsa-miR-328	7431	VIM	vimentin	827	0.253838	74	0.017886
MIMAT0000752	hsa-miR-328	81848	SPRY4	sprouty homolog 4 (Drosophila)	827	0.253838	74	0.017886
MIMAT0000752	hsa-miR-328	8204	NRIP1	nuclear receptor interacting protein 1	827	0.253838	74	0.017886
MIMAT0000752	hsa-miR-328	8324	FZD7	frizzled homolog 7 (Drosophila)	827	0.253838	74	0.017886
MIMAT0000752	hsa-miR-328	8646	CHRD	chordin	827	0.253838	74	0.017886
MIMAT0000752	hsa-miR-328	9806	SPOCK2	sparc/osteonectin, cwcv and kazal-like domains proteoglycan (testican) 2	827	0.253838	74	0.017886
MIMAT0000227	hsa-miR-197	10000	AKT3	v-akt murine thymoma viral oncogene homolog 3 (protein kinase B, gamma)	585	0.424937	106	0.173497
MIMAT0000227	hsa-miR-197	1066	CES1	carboxylesterase 1 (monocyte/macrophage serine esterase 1)	585	0.424937	106	0.173497
MIMAT0000227	hsa-miR-197	23194	FBXL7	F-box and leucine-rich repeat protein 7	585	0.424937	106	0.173497
MIMAT0000227	hsa-miR-197	28951	TRIB2	tribbles homolog 2 (Drosophila)	585	0.424937	106	0.173497
MIMAT0000227	hsa-miR-197	4862	NPAS2	neuronal PAS domain protein 2	585	0.424937	106	0.173497
MIMAT0000227	hsa-miR-197	5156	PDGFRA	platelet-derived growth factor receptor, alpha polypeptide	585	0.424937	106	0.173497
MIMAT0000227	hsa-miR-197	55022	PID1	phosphotyrosine interaction domain containing 1	585	0.424937	106	0.173497
MIMAT0000227	hsa-miR-197	56034	PDGFC	platelet derived growth factor C	585	0.424937	106	0.173497
MIMAT0000227	hsa-miR-197	7026	NR2F2	nuclear receptor subfamily 2, group F, member 2	585	0.424937	106	0.173497
MIMAT0000227	hsa-miR-197	7474	WNT5A	wingless-type MMTV integration site family, member 5A	585	0.424937	106	0.173497
MIMAT0000227	hsa-miR-197	8082	SSPN	sarcospan (Kras oncogene-associated gene)	585	0.424937	106	0.173497
MIMAT0000227	hsa-miR-197	8532	CPZ	carboxypeptidase Z	585	0.424937	106	0.173497
MIMAT0000227	hsa-miR-197	9806	SPOCK2	sparc/osteonectin, cwcv and kazal-like domains proteoglycan (testican) 2	585	0.424937	106	0.173497

## Sheet: gene_LOW_C2_miR_HIGH_C2
					Enrichment, miR targets within gene set (one-sided Fisher's exact)
miRNA accession	miRNA name	Gene ID	Gene Symbol	Gene Title	Miranda targets on entire array	Miranda, enrichment P-value	TargetScan targets on entire array	TargetScan, enrichment P-value
MIMAT0000461	hsa-miR-195	11274	USP18	ubiquitin specific peptidase 18	1435	0.386617	718	NS
MIMAT0000461	hsa-miR-195	24137	KIF4A	kinesin family member 4A	1435	0.386617	718	NS
MIMAT0000461	hsa-miR-195	27074	LAMP3	lysosomal-associated membrane protein 3	1435	0.386617	718	NS
MIMAT0000461	hsa-miR-195	2886	GRB7	growth factor receptor-bound protein 7	1435	0.386617	718	NS
MIMAT0000461	hsa-miR-195	4610	MYCL1	v-myc myelocytomatosis viral oncogene homolog 1, lung carcinoma derived (avian)	1435	0.386617	718	NS
MIMAT0000461	hsa-miR-195	51380	CSAD	cysteine sulfinic acid decarboxylase	1435	0.386617	718	NS
MIMAT0000461	hsa-miR-195	65979	PHACTR4	phosphatase and actin regulator 4	1435	0.386617	718	NS
MIMAT0000461	hsa-miR-195	898	CCNE1	cyclin E1	1435	0.386617	718	NS
MIMAT0000263	hsa-miR-199b-5p	5742	PTGS1	prostaglandin-endoperoxide synthase 1 (prostaglandin G/H synthase and cyclooxygenase)	990	NS	293	NS

## Sheet: gene_HIGH_C3_miR_LOW_C3
					Enrichment, miR targets within gene set (one-sided Fisher's exact)
miRNA accession	miRNA name	Gene ID	Gene Symbol	Gene Title	Miranda targets on entire array	Miranda, enrichment P-value	TargetScan targets on entire array	TargetScan, enrichment P-value
MIMAT0000710	hsa-miR-365	133	ADM	adrenomedullin	514	0.0105795	136	0.143403
MIMAT0000710	hsa-miR-365	26298	EHF	ets homologous factor	514	0.0105795	136	0.143403
MIMAT0000710	hsa-miR-365	4929	NR4A2	nuclear receptor subfamily 4, group A, member 2	514	0.0105795	136	0.143403
MIMAT0000710	hsa-miR-365	54845	ESRP1	RNA binding motif protein 35A	514	0.0105795	136	0.143403
MIMAT0000710	hsa-miR-365	55	ACPP	acid phosphatase, prostate	514	0.0105795	136	0.143403
MIMAT0000710	hsa-miR-365	57402	S100A14	S100 calcium binding protein A14	514	0.0105795	136	0.143403
MIMAT0000710	hsa-miR-365	7227	TRPS1	trichorhinophalangeal syndrome I	514	0.0105795	136	0.143403
MIMAT0000710	hsa-miR-365	7804	LRP8	low density lipoprotein receptor-related protein 8, apolipoprotein e receptor	514	0.0105795	136	0.143403
MIMAT0000710	hsa-miR-365	80124	VCPIP1	valosin containing protein (p97)/p47 complex interacting protein 1	514	0.0105795	136	0.143403
MIMAT0000710	hsa-miR-365	8743	TNFSF10	tumor necrosis factor (ligand) superfamily, member 10	514	0.0105795	136	0.143403
MIMAT0000710	hsa-miR-365	960	CD44	CD44 molecule (Indian blood group)	514	0.0105795	136	0.143403
MIMAT0000414	hsa-let-7g	116984	ARAP2	centaurin, delta 1	965	0.043545	596	NS
MIMAT0000414	hsa-let-7g	133	ADM	adrenomedullin	965	0.043545	596	NS
MIMAT0000414	hsa-let-7g	25833	POU2F3	POU class 2 homeobox 3	965	0.043545	596	NS
MIMAT0000414	hsa-let-7g	26031	OSBPL3	oxysterol binding protein-like 3	965	0.043545	596	NS
MIMAT0000414	hsa-let-7g	26298	EHF	ets homologous factor	965	0.043545	596	NS
MIMAT0000414	hsa-let-7g	3231	HOXD1	homeobox D1	965	0.043545	596	NS
MIMAT0000414	hsa-let-7g	4602	MYB	v-myb myeloblastosis viral oncogene homolog (avian)	965	0.043545	596	NS
MIMAT0000414	hsa-let-7g	54739	XAF1	XIAP associated factor 1	965	0.043545	596	NS
MIMAT0000414	hsa-let-7g	54845	ESRP1	RNA binding motif protein 35A	965	0.043545	596	NS
MIMAT0000414	hsa-let-7g	55	ACPP	acid phosphatase, prostate	965	0.043545	596	NS
MIMAT0000414	hsa-let-7g	57402	S100A14	S100 calcium binding protein A14	965	0.043545	596	NS
MIMAT0000414	hsa-let-7g	717	C2	complement component 2	965	0.043545	596	NS
MIMAT0000414	hsa-let-7g	7504	XK	X-linked Kx blood group (McLeod syndrome)	965	0.043545	596	NS
MIMAT0000414	hsa-let-7g	80124	VCPIP1	valosin containing protein (p97)/p47 complex interacting protein 1	965	0.043545	596	NS
MIMAT0000414	hsa-let-7g	80830	APOL6	apolipoprotein L, 6	965	0.043545	596	NS
MIMAT0000067	hsa-let-7f	25833	POU2F3	POU class 2 homeobox 3	993	0.158526	596	NS
MIMAT0000067	hsa-let-7f	26031	OSBPL3	oxysterol binding protein-like 3	993	0.158526	596	NS
MIMAT0000067	hsa-let-7f	26298	EHF	ets homologous factor	993	0.158526	596	NS
MIMAT0000067	hsa-let-7f	3231	HOXD1	homeobox D1	993	0.158526	596	NS
MIMAT0000067	hsa-let-7f	4602	MYB	v-myb myeloblastosis viral oncogene homolog (avian)	993	0.158526	596	NS
MIMAT0000067	hsa-let-7f	4929	NR4A2	nuclear receptor subfamily 4, group A, member 2	993	0.158526	596	NS
MIMAT0000067	hsa-let-7f	54845	ESRP1	RNA binding motif protein 35A	993	0.158526	596	NS
MIMAT0000067	hsa-let-7f	55	ACPP	acid phosphatase, prostate	993	0.158526	596	NS
MIMAT0000067	hsa-let-7f	717	C2	complement component 2	993	0.158526	596	NS
MIMAT0000067	hsa-let-7f	7504	XK	X-linked Kx blood group (McLeod syndrome)	993	0.158526	596	NS
MIMAT0000067	hsa-let-7f	79679	VTCN1	V-set domain containing T cell activation inhibitor 1	993	0.158526	596	NS
MIMAT0000067	hsa-let-7f	80124	VCPIP1	valosin containing protein (p97)/p47 complex interacting protein 1	993	0.158526	596	NS
MIMAT0000067	hsa-let-7f	80830	APOL6	apolipoprotein L, 6	993	0.158526	596	NS
MIMAT0000062	hsa-let-7a	133	ADM	adrenomedullin	1016	0.178226	596	NS
MIMAT0000062	hsa-let-7a	26031	OSBPL3	oxysterol binding protein-like 3	1016	0.178226	596	NS
MIMAT0000062	hsa-let-7a	26298	EHF	ets homologous factor	1016	0.178226	596	NS
MIMAT0000062	hsa-let-7a	3231	HOXD1	homeobox D1	1016	0.178226	596	NS
MIMAT0000062	hsa-let-7a	4602	MYB	v-myb myeloblastosis viral oncogene homolog (avian)	1016	0.178226	596	NS
MIMAT0000062	hsa-let-7a	4929	NR4A2	nuclear receptor subfamily 4, group A, member 2	1016	0.178226	596	NS
MIMAT0000062	hsa-let-7a	54845	ESRP1	RNA binding motif protein 35A	1016	0.178226	596	NS
MIMAT0000062	hsa-let-7a	55	ACPP	acid phosphatase, prostate	1016	0.178226	596	NS
MIMAT0000062	hsa-let-7a	717	C2	complement component 2	1016	0.178226	596	NS
MIMAT0000062	hsa-let-7a	7504	XK	X-linked Kx blood group (McLeod syndrome)	1016	0.178226	596	NS
MIMAT0000062	hsa-let-7a	79679	VTCN1	V-set domain containing T cell activation inhibitor 1	1016	0.178226	596	NS
MIMAT0000062	hsa-let-7a	80124	VCPIP1	valosin containing protein (p97)/p47 complex interacting protein 1	1016	0.178226	596	NS
MIMAT0000062	hsa-let-7a	80830	APOL6	apolipoprotein L, 6	1016	0.178226	596	NS
MIMAT0000096	hsa-miR-98	133	ADM	adrenomedullin	1053	0.212336	596	NS
MIMAT0000096	hsa-miR-98	25833	POU2F3	POU class 2 homeobox 3	1053	0.212336	596	NS
MIMAT0000096	hsa-miR-98	26031	OSBPL3	oxysterol binding protein-like 3	1053	0.212336	596	NS
MIMAT0000096	hsa-miR-98	26298	EHF	ets homologous factor	1053	0.212336	596	NS
MIMAT0000096	hsa-miR-98	3231	HOXD1	homeobox D1	1053	0.212336	596	NS
MIMAT0000096	hsa-miR-98	4602	MYB	v-myb myeloblastosis viral oncogene homolog (avian)	1053	0.212336	596	NS
MIMAT0000096	hsa-miR-98	4929	NR4A2	nuclear receptor subfamily 4, group A, member 2	1053	0.212336	596	NS
MIMAT0000096	hsa-miR-98	55	ACPP	acid phosphatase, prostate	1053	0.212336	596	NS
MIMAT0000096	hsa-miR-98	717	C2	complement component 2	1053	0.212336	596	NS
MIMAT0000096	hsa-miR-98	7504	XK	X-linked Kx blood group (McLeod syndrome)	1053	0.212336	596	NS
MIMAT0000096	hsa-miR-98	79679	VTCN1	V-set domain containing T cell activation inhibitor 1	1053	0.212336	596	NS
MIMAT0000096	hsa-miR-98	80124	VCPIP1	valosin containing protein (p97)/p47 complex interacting protein 1	1053	0.212336	596	NS
MIMAT0000096	hsa-miR-98	80830	APOL6	apolipoprotein L, 6	1053	0.212336	596	NS
MIMAT0000083	hsa-miR-26b	133	ADM	adrenomedullin	993	0.246918	481	0.495753
MIMAT0000083	hsa-miR-26b	2444	FRK	fyn-related kinase	993	0.246918	481	0.495753
MIMAT0000083	hsa-miR-26b	25816	TNFAIP8	tumor necrosis factor, alpha-induced protein 8	993	0.246918	481	0.495753
MIMAT0000083	hsa-miR-26b	26031	OSBPL3	oxysterol binding protein-like 3	993	0.246918	481	0.495753
MIMAT0000083	hsa-miR-26b	2633	GBP1	guanylate binding protein 1, interferon-inducible, 67kDa	993	0.246918	481	0.495753
MIMAT0000083	hsa-miR-26b	3458	IFNG	interferon, gamma	993	0.246918	481	0.495753
MIMAT0000083	hsa-miR-26b	3838	KPNA2	karyopherin alpha 2 (RAG cohort 1, importin alpha 1)	993	0.246918	481	0.495753
MIMAT0000083	hsa-miR-26b	54845	ESRP1	RNA binding motif protein 35A	993	0.246918	481	0.495753
MIMAT0000083	hsa-miR-26b	55	ACPP	acid phosphatase, prostate	993	0.246918	481	0.495753
MIMAT0000083	hsa-miR-26b	79056	PRRG4	proline rich Gla (G-carboxyglutamic acid) 4 (transmembrane)	993	0.246918	481	0.495753
MIMAT0000083	hsa-miR-26b	79931	TNIP3	TNFAIP3 interacting protein 3	993	0.246918	481	0.495753
MIMAT0000083	hsa-miR-26b	80124	VCPIP1	valosin containing protein (p97)/p47 complex interacting protein 1	993	0.246918	481	0.495753
MIMAT0000431	hsa-miR-140-5p	116984	ARAP2	centaurin, delta 1	886	0.348371	190	0.549079
MIMAT0000431	hsa-miR-140-5p	19	ABCA1	ATP-binding cassette, sub-family A (ABC1), member 1	886	0.348371	190	0.549079
MIMAT0000431	hsa-miR-140-5p	26031	OSBPL3	oxysterol binding protein-like 3	886	0.348371	190	0.549079
MIMAT0000431	hsa-miR-140-5p	26298	EHF	ets homologous factor	886	0.348371	190	0.549079
MIMAT0000431	hsa-miR-140-5p	602	BCL3	B-cell CLL/lymphoma 3	886	0.348371	190	0.549079
MIMAT0000431	hsa-miR-140-5p	64798	DEPDC6	DEP domain containing 6	886	0.348371	190	0.549079
MIMAT0000431	hsa-miR-140-5p	7037	TFRC	transferrin receptor (p90, CD71)	886	0.348371	190	0.549079
MIMAT0000431	hsa-miR-140-5p	7227	TRPS1	trichorhinophalangeal syndrome I	886	0.348371	190	0.549079
MIMAT0000431	hsa-miR-140-5p	79679	VTCN1	V-set domain containing T cell activation inhibitor 1	886	0.348371	190	0.549079
MIMAT0000431	hsa-miR-140-5p	80124	VCPIP1	valosin containing protein (p97)/p47 complex interacting protein 1	886	0.348371	190	0.549079
MIMAT0000066	hsa-let-7e	116984	ARAP2	centaurin, delta 1	1147	0.426328	596	NS
MIMAT0000066	hsa-let-7e	26031	OSBPL3	oxysterol binding protein-like 3	1147	0.426328	596	NS
MIMAT0000066	hsa-let-7e	3231	HOXD1	homeobox D1	1147	0.426328	596	NS
MIMAT0000066	hsa-let-7e	4602	MYB	v-myb myeloblastosis viral oncogene homolog (avian)	1147	0.426328	596	NS
MIMAT0000066	hsa-let-7e	4929	NR4A2	nuclear receptor subfamily 4, group A, member 2	1147	0.426328	596	NS
MIMAT0000066	hsa-let-7e	54739	XAF1	XIAP associated factor 1	1147	0.426328	596	NS
MIMAT0000066	hsa-let-7e	55	ACPP	acid phosphatase, prostate	1147	0.426328	596	NS
MIMAT0000066	hsa-let-7e	717	C2	complement component 2	1147	0.426328	596	NS
MIMAT0000066	hsa-let-7e	7504	XK	X-linked Kx blood group (McLeod syndrome)	1147	0.426328	596	NS
MIMAT0000066	hsa-let-7e	79679	VTCN1	V-set domain containing T cell activation inhibitor 1	1147	0.426328	596	NS
MIMAT0000066	hsa-let-7e	80124	VCPIP1	valosin containing protein (p97)/p47 complex interacting protein 1	1147	0.426328	596	NS
MIMAT0000066	hsa-let-7e	80830	APOL6	apolipoprotein L, 6	1147	0.426328	596	NS
MIMAT0000065	hsa-let-7d	26031	OSBPL3	oxysterol binding protein-like 3	972	0.462129	596	NS
MIMAT0000065	hsa-let-7d	3231	HOXD1	homeobox D1	972	0.462129	596	NS
MIMAT0000065	hsa-let-7d	4602	MYB	v-myb myeloblastosis viral oncogene homolog (avian)	972	0.462129	596	NS
MIMAT0000065	hsa-let-7d	4929	NR4A2	nuclear receptor subfamily 4, group A, member 2	972	0.462129	596	NS
MIMAT0000065	hsa-let-7d	54845	ESRP1	RNA binding motif protein 35A	972	0.462129	596	NS
MIMAT0000065	hsa-let-7d	55	ACPP	acid phosphatase, prostate	972	0.462129	596	NS
MIMAT0000065	hsa-let-7d	717	C2	complement component 2	972	0.462129	596	NS
MIMAT0000065	hsa-let-7d	7504	XK	X-linked Kx blood group (McLeod syndrome)	972	0.462129	596	NS
MIMAT0000065	hsa-let-7d	80124	VCPIP1	valosin containing protein (p97)/p47 complex interacting protein 1	972	0.462129	596	NS
MIMAT0000065	hsa-let-7d	80830	APOL6	apolipoprotein L, 6	972	0.462129	596	NS
MIMAT0000765	hsa-miR-335	2065	ERBB3	v-erb-b2 erythroblastic leukemia viral oncogene homolog 3 (avian)	1079	0.4682	120	0.321812
MIMAT0000765	hsa-miR-335	25833	POU2F3	POU class 2 homeobox 3	1079	0.4682	120	0.321812
MIMAT0000765	hsa-miR-335	26031	OSBPL3	oxysterol binding protein-like 3	1079	0.4682	120	0.321812
MIMAT0000765	hsa-miR-335	2633	GBP1	guanylate binding protein 1, interferon-inducible, 67kDa	1079	0.4682	120	0.321812
MIMAT0000765	hsa-miR-335	26578	OSTF1	osteoclast stimulating factor 1	1079	0.4682	120	0.321812
MIMAT0000765	hsa-miR-335	3659	IRF1	interferon regulatory factor 1	1079	0.4682	120	0.321812
MIMAT0000765	hsa-miR-335	54845	ESRP1	RNA binding motif protein 35A	1079	0.4682	120	0.321812
MIMAT0000765	hsa-miR-335	6352	CCL5	chemokine (C-C motif) ligand 5	1079	0.4682	120	0.321812
MIMAT0000765	hsa-miR-335	6614	SIGLEC1	sialic acid binding Ig-like lectin 1, sialoadhesin	1079	0.4682	120	0.321812
MIMAT0000765	hsa-miR-335	7227	TRPS1	trichorhinophalangeal syndrome I	1079	0.4682	120	0.321812
MIMAT0000765	hsa-miR-335	960	CD44	CD44 molecule (Indian blood group)	1079	0.4682	120	0.321812
MIMAT0000275	hsa-miR-218	116984	ARAP2	centaurin, delta 1	861	NS	501	NS
MIMAT0000275	hsa-miR-218	23780	APOL2	apolipoprotein L, 2	861	NS	501	NS
MIMAT0000275	hsa-miR-218	2444	FRK	fyn-related kinase	861	NS	501	NS
MIMAT0000275	hsa-miR-218	26031	OSBPL3	oxysterol binding protein-like 3	861	NS	501	NS
MIMAT0000275	hsa-miR-218	602	BCL3	B-cell CLL/lymphoma 3	861	NS	501	NS
MIMAT0000275	hsa-miR-218	64866	CDCP1	CUB domain containing protein 1	861	NS	501	NS
MIMAT0000275	hsa-miR-218	6614	SIGLEC1	sialic acid binding Ig-like lectin 1, sialoadhesin	861	NS	501	NS
MIMAT0000275	hsa-miR-218	79679	VTCN1	V-set domain containing T cell activation inhibitor 1	861	NS	501	NS
MIMAT0002809	hsa-miR-146b-5p	1238	CCBP2	chemokine binding protein 2	850	NS	97	0.610341
MIMAT0002809	hsa-miR-146b-5p	2564	GABRE	gamma-aminobutyric acid (GABA) A receptor, epsilon	850	NS	97	0.610341
MIMAT0002809	hsa-miR-146b-5p	25816	TNFAIP8	tumor necrosis factor, alpha-induced protein 8	850	NS	97	0.610341
MIMAT0002809	hsa-miR-146b-5p	25833	POU2F3	POU class 2 homeobox 3	850	NS	97	0.610341
MIMAT0002809	hsa-miR-146b-5p	56833	SLAMF8	SLAM family member 8	850	NS	97	0.610341
MIMAT0002809	hsa-miR-146b-5p	6352	CCL5	chemokine (C-C motif) ligand 5	850	NS	97	0.610341
MIMAT0002809	hsa-miR-146b-5p	7504	XK	X-linked Kx blood group (McLeod syndrome)	850	NS	97	0.610341
MIMAT0002809	hsa-miR-146b-5p	79679	VTCN1	V-set domain containing T cell activation inhibitor 1	850	NS	97	0.610341
MIMAT0001341	hsa-miR-424	133	ADM	adrenomedullin	1550	NS	718	0.54242
MIMAT0001341	hsa-miR-424	2564	GABRE	gamma-aminobutyric acid (GABA) A receptor, epsilon	1550	NS	718	0.54242
MIMAT0001341	hsa-miR-424	26298	EHF	ets homologous factor	1550	NS	718	0.54242
MIMAT0001341	hsa-miR-424	3600	IL15	interleukin 15	1550	NS	718	0.54242
MIMAT0001341	hsa-miR-424	4602	MYB	v-myb myeloblastosis viral oncogene homolog (avian)	1550	NS	718	0.54242
MIMAT0001341	hsa-miR-424	4929	NR4A2	nuclear receptor subfamily 4, group A, member 2	1550	NS	718	0.54242
MIMAT0001341	hsa-miR-424	55	ACPP	acid phosphatase, prostate	1550	NS	718	0.54242
MIMAT0001341	hsa-miR-424	56649	TMPRSS4	transmembrane protease, serine 4	1550	NS	718	0.54242
MIMAT0001341	hsa-miR-424	6523	SLC5A1	solute carrier family 5 (sodium/glucose cotransporter), member 1	1550	NS	718	0.54242
MIMAT0001341	hsa-miR-424	7227	TRPS1	trichorhinophalangeal syndrome I	1550	NS	718	0.54242
MIMAT0001341	hsa-miR-424	969	CD69	CD69 molecule	1550	NS	718	0.54242
MIMAT0000428	hsa-miR-135a	19	ABCA1	ATP-binding cassette, sub-family A (ABC1), member 1	1372	NS	386	NS
MIMAT0000428	hsa-miR-135a	2444	FRK	fyn-related kinase	1372	NS	386	NS
MIMAT0000428	hsa-miR-135a	25833	POU2F3	POU class 2 homeobox 3	1372	NS	386	NS
MIMAT0000428	hsa-miR-135a	30850	CDR2L	cerebellar degeneration-related protein 2-like	1372	NS	386	NS
MIMAT0000428	hsa-miR-135a	3627	CXCL10	chemokine (C-X-C motif) ligand 10	1372	NS	386	NS
MIMAT0000428	hsa-miR-135a	4602	MYB	v-myb myeloblastosis viral oncogene homolog (avian)	1372	NS	386	NS
MIMAT0000428	hsa-miR-135a	4939	OAS2	2'-5'-oligoadenylate synthetase 2, 69/71kDa	1372	NS	386	NS
MIMAT0000428	hsa-miR-135a	55	ACPP	acid phosphatase, prostate	1372	NS	386	NS
MIMAT0000428	hsa-miR-135a	6523	SLC5A1	solute carrier family 5 (sodium/glucose cotransporter), member 1	1372	NS	386	NS
MIMAT0000428	hsa-miR-135a	79679	VTCN1	V-set domain containing T cell activation inhibitor 1	1372	NS	386	NS
MIMAT0000428	hsa-miR-135a	8743	TNFSF10	tumor necrosis factor (ligand) superfamily, member 10	1372	NS	386	NS
MIMAT0000428	hsa-miR-135a	960	CD44	CD44 molecule (Indian blood group)	1372	NS	386	NS
MIMAT0000758	hsa-miR-135b	19	ABCA1	ATP-binding cassette, sub-family A (ABC1), member 1	1274	NS	386	NS
MIMAT0000758	hsa-miR-135b	2444	FRK	fyn-related kinase	1274	NS	386	NS
MIMAT0000758	hsa-miR-135b	25833	POU2F3	POU class 2 homeobox 3	1274	NS	386	NS
MIMAT0000758	hsa-miR-135b	30850	CDR2L	cerebellar degeneration-related protein 2-like	1274	NS	386	NS
MIMAT0000758	hsa-miR-135b	3627	CXCL10	chemokine (C-X-C motif) ligand 10	1274	NS	386	NS
MIMAT0000758	hsa-miR-135b	4602	MYB	v-myb myeloblastosis viral oncogene homolog (avian)	1274	NS	386	NS
MIMAT0000758	hsa-miR-135b	4939	OAS2	2'-5'-oligoadenylate synthetase 2, 69/71kDa	1274	NS	386	NS
MIMAT0000758	hsa-miR-135b	55	ACPP	acid phosphatase, prostate	1274	NS	386	NS
MIMAT0000758	hsa-miR-135b	6523	SLC5A1	solute carrier family 5 (sodium/glucose cotransporter), member 1	1274	NS	386	NS
MIMAT0000758	hsa-miR-135b	79679	VTCN1	V-set domain containing T cell activation inhibitor 1	1274	NS	386	NS
MIMAT0000758	hsa-miR-135b	960	CD44	CD44 molecule (Indian blood group)	1274	NS	386	NS
MIMAT0000727	hsa-miR-374a	2444	FRK	fyn-related kinase	1308	NS	346	NS
MIMAT0000727	hsa-miR-374a	3601	IL15RA	interleukin 15 receptor, alpha	1308	NS	346	NS
MIMAT0000727	hsa-miR-374a	3620	IDO1	indoleamine-pyrrole 2,3 dioxygenase	1308	NS	346	NS
MIMAT0000727	hsa-miR-374a	4602	MYB	v-myb myeloblastosis viral oncogene homolog (avian)	1308	NS	346	NS
MIMAT0000727	hsa-miR-374a	4929	NR4A2	nuclear receptor subfamily 4, group A, member 2	1308	NS	346	NS
MIMAT0000727	hsa-miR-374a	54845	ESRP1	RNA binding motif protein 35A	1308	NS	346	NS
MIMAT0000727	hsa-miR-374a	55	ACPP	acid phosphatase, prostate	1308	NS	346	NS
MIMAT0000727	hsa-miR-374a	7227	TRPS1	trichorhinophalangeal syndrome I	1308	NS	346	NS
MIMAT0000727	hsa-miR-374a	7504	XK	X-linked Kx blood group (McLeod syndrome)	1308	NS	346	NS
MIMAT0000727	hsa-miR-374a	7804	LRP8	low density lipoprotein receptor-related protein 8, apolipoprotein e receptor	1308	NS	346	NS
MIMAT0000727	hsa-miR-374a	969	CD69	CD69 molecule	1308	NS	346	NS
MIMAT0004955	hsa-miR-374b	2444	FRK	fyn-related kinase	1220	NS	346	NS
MIMAT0004955	hsa-miR-374b	3601	IL15RA	interleukin 15 receptor, alpha	1220	NS	346	NS
MIMAT0004955	hsa-miR-374b	3620	IDO1	indoleamine-pyrrole 2,3 dioxygenase	1220	NS	346	NS
MIMAT0004955	hsa-miR-374b	4602	MYB	v-myb myeloblastosis viral oncogene homolog (avian)	1220	NS	346	NS
MIMAT0004955	hsa-miR-374b	4929	NR4A2	nuclear receptor subfamily 4, group A, member 2	1220	NS	346	NS
MIMAT0004955	hsa-miR-374b	55	ACPP	acid phosphatase, prostate	1220	NS	346	NS
MIMAT0004955	hsa-miR-374b	7227	TRPS1	trichorhinophalangeal syndrome I	1220	NS	346	NS
MIMAT0004955	hsa-miR-374b	7504	XK	X-linked Kx blood group (McLeod syndrome)	1220	NS	346	NS
MIMAT0004955	hsa-miR-374b	7804	LRP8	low density lipoprotein receptor-related protein 8, apolipoprotein e receptor	1220	NS	346	NS
MIMAT0004955	hsa-miR-374b	969	CD69	CD69 molecule	1220	NS	346	NS
MIMAT0000085	hsa-miR-28-5p	26298	EHF	ets homologous factor	940	NS	82	0.548973
MIMAT0000085	hsa-miR-28-5p	7037	TFRC	transferrin receptor (p90, CD71)	940	NS	82	0.548973
MIMAT0000085	hsa-miR-28-5p	7227	TRPS1	trichorhinophalangeal syndrome I	940	NS	82	0.548973
MIMAT0000085	hsa-miR-28-5p	7409	VAV1	vav 1 guanine nucleotide exchange factor	940	NS	82	0.548973
MIMAT0000085	hsa-miR-28-5p	79679	VTCN1	V-set domain containing T cell activation inhibitor 1	940	NS	82	0.548973
MIMAT0003258	hsa-miR-590-5p	341	APOC1	apolipoprotein C-I	797	NS	163	0.467398
MIMAT0003258	hsa-miR-590-5p	3592	IL12A	interleukin 12A (natural killer cell stimulatory factor 1, cytotoxic lymphocyte maturation factor 1, p35)	797	NS	163	0.467398
MIMAT0003258	hsa-miR-590-5p	64798	DEPDC6	DEP domain containing 6	797	NS	163	0.467398
MIMAT0003258	hsa-miR-590-5p	7037	TFRC	transferrin receptor (p90, CD71)	797	NS	163	0.467398
MIMAT0003258	hsa-miR-590-5p	7227	TRPS1	trichorhinophalangeal syndrome I	797	NS	163	0.467398
MIMAT0003258	hsa-miR-590-5p	80124	VCPIP1	valosin containing protein (p97)/p47 complex interacting protein 1	797	NS	163	0.467398
MIMAT0003258	hsa-miR-590-5p	969	CD69	CD69 molecule	797	NS	163	0.467398

## Sheet: gene_LOW_C3_miR_HIGH_C3
					Enrichment, miR targets within gene set (one-sided Fisher's exact)
miRNA accession	miRNA name	Gene ID	Gene Symbol	Gene Title	Miranda targets on entire array	Miranda, enrichment P-value	TargetScan targets on entire array	TargetScan, enrichment P-value
MIMAT0000510	hsa-miR-320a	1000	CDH2	cadherin 2, type 1, N-cadherin (neuronal)	1349	0.0309335	413	0.0393559
MIMAT0000510	hsa-miR-320a	11013	TMSB15A	thymosin-like 8	1349	0.0309335	413	0.0393559
MIMAT0000510	hsa-miR-320a	1602	DACH1	dachshund homolog 1 (Drosophila)	1349	0.0309335	413	0.0393559
MIMAT0000510	hsa-miR-320a	23708	GSPT2	G1 to S phase transition 2	1349	0.0309335	413	0.0393559
MIMAT0000510	hsa-miR-320a	2770	GNAI1	guanine nucleotide binding protein (G protein), alpha inhibiting activity polypeptide 1	1349	0.0309335	413	0.0393559
MIMAT0000510	hsa-miR-320a	4038	LRP4	low density lipoprotein receptor-related protein 4	1349	0.0309335	413	0.0393559
MIMAT0000510	hsa-miR-320a	4745	NELL1	NEL-like 1 (chicken)	1349	0.0309335	413	0.0393559
MIMAT0000510	hsa-miR-320a	5569	PKIA	protein kinase (cAMP-dependent, catalytic) inhibitor alpha	1349	0.0309335	413	0.0393559
MIMAT0000510	hsa-miR-320a	6297	SALL2	sal-like 2 (Drosophila)	1349	0.0309335	413	0.0393559
MIMAT0000510	hsa-miR-320a	6664	SOX11	SRY (sex determining region Y)-box 11	1349	0.0309335	413	0.0393559
MIMAT0000510	hsa-miR-320a	7991	TUSC3	tumor suppressor candidate 3	1349	0.0309335	413	0.0393559
MIMAT0000510	hsa-miR-320a	79971	WLS	G protein-coupled receptor 177	1349	0.0309335	413	0.0393559
MIMAT0000510	hsa-miR-320a	83439	TCF7L1	transcription factor 7-like 1 (T-cell specific, HMG-box)	1349	0.0309335	413	0.0393559
MIMAT0000510	hsa-miR-320a	9315	C5orf13	chromosome 5 open reading frame 13	1349	0.0309335	413	0.0393559
MIMAT0002816	hsa-miR-494	1000	CDH2	cadherin 2, type 1, N-cadherin (neuronal)	1270	0.144897	275	NS
MIMAT0002816	hsa-miR-494	1036	CDO1	cysteine dioxygenase, type I	1270	0.144897	275	NS
MIMAT0002816	hsa-miR-494	11013	TMSB15A	thymosin-like 8	1270	0.144897	275	NS
MIMAT0002816	hsa-miR-494	23284	LPHN3	latrophilin 3	1270	0.144897	275	NS
MIMAT0002816	hsa-miR-494	4675	NAP1L3	nucleosome assembly protein 1-like 3	1270	0.144897	275	NS
MIMAT0002816	hsa-miR-494	4745	NELL1	NEL-like 1 (chicken)	1270	0.144897	275	NS
MIMAT0002816	hsa-miR-494	5063	PAK3	p21 (CDKN1A)-activated kinase 3	1270	0.144897	275	NS
MIMAT0002816	hsa-miR-494	55190	NUDT11	nudix (nucleoside diphosphate linked moiety X)-type motif 11	1270	0.144897	275	NS
MIMAT0002816	hsa-miR-494	57586	SYT13	synaptotagmin XIII	1270	0.144897	275	NS
MIMAT0002816	hsa-miR-494	6664	SOX11	SRY (sex determining region Y)-box 11	1270	0.144897	275	NS
MIMAT0002816	hsa-miR-494	9227	LRAT	lecithin retinol acyltransferase (phosphatidylcholine--retinol O-acyltransferase)	1270	0.144897	275	NS
MIMAT0000447	hsa-miR-134	1280	COL2A1	collagen, type II, alpha 1	634	0.187411	65	0.328085
MIMAT0000447	hsa-miR-134	2258	FGF13	fibroblast growth factor 13	634	0.187411	65	0.328085
MIMAT0000447	hsa-miR-134	23284	LPHN3	latrophilin 3	634	0.187411	65	0.328085
MIMAT0000447	hsa-miR-134	50937	CDON	Cdon homolog (mouse)	634	0.187411	65	0.328085
MIMAT0000447	hsa-miR-134	79971	WLS	G protein-coupled receptor 177	634	0.187411	65	0.328085
MIMAT0000447	hsa-miR-134	9315	C5orf13	chromosome 5 open reading frame 13	634	0.187411	65	0.328085
MIMAT0000245	hsa-miR-30d	23284	LPHN3	latrophilin 3	1012	0.41966	816	0.0582567
MIMAT0000245	hsa-miR-30d	4038	LRP4	low density lipoprotein receptor-related protein 4	1012	0.41966	816	0.0582567
MIMAT0000245	hsa-miR-30d	5217	PFN2	profilin 2	1012	0.41966	816	0.0582567
MIMAT0000245	hsa-miR-30d	55859	BEX1	brain expressed, X-linked 1	1012	0.41966	816	0.0582567
MIMAT0000245	hsa-miR-30d	7216	TRO	trophinin	1012	0.41966	816	0.0582567
MIMAT0000245	hsa-miR-30d	7991	TUSC3	tumor suppressor candidate 3	1012	0.41966	816	0.0582567
MIMAT0000245	hsa-miR-30d	90362	FAM110B	family with sequence similarity 110, member B	1012	0.41966	816	0.0582567
MIMAT0000722	hsa-miR-370	4038	LRP4	low density lipoprotein receptor-related protein 4	919	0.490664	159	0.623396
MIMAT0000722	hsa-miR-370	51222	ZNF219	zinc finger protein 219	919	0.490664	159	0.623396
MIMAT0000722	hsa-miR-370	5348	FXYD1	FXYD domain containing ion transport regulator 1 (phospholemman)	919	0.490664	159	0.623396
MIMAT0000722	hsa-miR-370	55859	BEX1	brain expressed, X-linked 1	919	0.490664	159	0.623396
MIMAT0000722	hsa-miR-370	5947	RBP1	retinol binding protein 1, cellular	919	0.490664	159	0.623396
MIMAT0000722	hsa-miR-370	7991	TUSC3	tumor suppressor candidate 3	919	0.490664	159	0.623396
