# Supplementary material for: Integrated Analyses of microRNAs Demonstrate Their Widespread Influence on Gene Expression in High-Grade Serous Ovarian Carcinoma
Source: PLoS One. 2012 Mar 29;7(3):e34546. doi: 10.1371/journal.pone.0034546 (PMC3315571; doi:10.1371/journal.pone.0034546)
Supplement: Dataset S4 — miR:mRNA correlation matrix for top expression miRs and mRNAs. (XLSX) [file pone.0034546.s004.xlsx]

## Sheet: correlation matrix clustered
Cluster	Gene	hsa.miR.29a	hsa.miR.29b	hsa.miR.29c	hsa.miR.101	hsa.miR.26a	hsa.miR.185	hsa.miR.146a	hsa.miR.142.3p	hsa.miR.142.5p	hsa.let.7b	hsa.miR.222	hsa.miR.22	hsa.miR.452	hsa.miR.21	hsa.miR.21.	hsa.miR.514	hsa.miR.509.3.5p	hsa.miR.509.3p	hsa.miR.183	hsa.miR.96	hsa.miR.106b	hsa.miR.25	hsa.miR.148b	hsa.miR.30e.	hsa.miR.17.	hsa.miR.20b	hsa.miR.17	hsa.miR.20a	hsa.miR.125b	hsa.miR.218	hsa.miR.335	hsa.miR.410	hsa.miR.18a	hsa.miR.130a	hsa.miR.301a
1	HSDL1	0	0	0	0	0	0	0	0	0	-7.05902	-7.01397	0	0	0	-7.17202	0	0	0	0	0	0	0	0	0	0	0	0	0	0	0	0	0	0	0	0
1	ZNF643	0	0	0	0	0	0	0	0	0	-8.95118	-7.51711	0	0	0	-7.05663	0	0	0	0	0	0	0	0	0	0	0	0	0	0	0	0	0	0	0	0
1	ZNF432	0	0	0	0	0	0	0	0	0	0	-7.42219	0	0	0	-7.89436	0	0	0	0	0	0	0	0	0	0	0	0	0	0	0	0	0	0	0	0
1	GKAP1	0	0	0	0	0	0	0	0	0	-8.17854	-7.17281	-8.71725	0	0	-9.01315	0	0	0	0	0	0	0	0	0	0	0	0	0	0	0	0	0	0	0	0
1	KLHL23	0	0	0	0	0	-7.14649	0	0	-8.20137	-9.67932	-9.91259	-10.2127	0	0	-9.75153	0	0	0	0	0	0	0	0	0	0	0	0	0	0	0	0	0	0	0	0
1	HFM1	0	-7.48727	0	0	0	0	0	0	-8.11968	-9.26127	-8.87288	-7.10882	0	0	-10.4695	0	0	0	0	0	0	0	0	0	0	0	0	0	0	0	0	0	0	0	0
1	PFAS	0	0	0	0	0	0	0	0	0	-7.57367	-7.51792	-7.51707	0	-7.10554	-8.42271	0	0	0	0	0	0	0	0	0	0	0	0	0	0	0	0	0	0	0	0
1	KIAA1958	0	0	0	0	0	0	0	0	-7.1422	-7.94343	-8.89842	-7.05355	0	-7.01948	-10.307	0	0	0	0	0	0	0	0	0	0	0	0	0	0	0	0	0	0	0	0
1	NUP160	0	0	0	0	0	0	0	0	0	-9.13896	-7.00092	0	0	0	0	0	0	0	0	0	0	0	0	0	0	0	0	0	0	0	0	0	0	0	0
1	ZC3HC1	0	0	0	0	0	0	0	0	0	-9.22063	-8.28878	0	0	0	0	0	0	0	0	0	0	0	0	0	0	0	0	0	0	0	0	0	0	0	0
1	ALX1	0	0	0	0	0	0	0	0	0	0	-7.12195	0	0	0	0	0	0	0	0	0	0	0	0	0	0	0	0	0	0	0	0	0	0	0	0
1	DEPDC4	0	0	0	0	0	0	0	0	0	0	-7.30321	0	0	0	0	0	0	0	0	0	0	0	0	0	0	0	0	0	0	0	0	0	0	0	0
1	PCOLCE2	0	0	0	0	0	0	0	0	0	0	-7.10077	0	0	0	0	0	0	0	0	0	0	0	0	0	0	0	0	0	0	0	0	0	0	0	0
1	ZFP1	0	0	0	0	0	0	0	0	0	0	-7.391	0	0	0	0	0	0	0	0	0	0	0	0	0	0	0	0	0	0	0	0	0	0	0	0
1	ZFP37	0	0	0	0	0	-7.11464	0	0	0	0	-7.04637	0	0	0	0	0	0	0	0	0	0	0	0	0	0	0	0	0	0	0	0	0	0	0	0
1	IMPG2	0	0	0	0	0	0	0	0	0	-7.5022	0	0	-7.00658	-7.93501	-8.29937	0	0	0	0	0	0	0	0	0	0	0	0	0	0	0	0	0	0	0	0
1	CLDN19	0	0	0	0	0	0	0	0	0	-8.69374	0	0	0	-7.3742	-8.71188	0	0	0	0	0	0	0	0	0	0	0	0	0	0	0	0	0	0	0	0
1	LYRM4	0	0	0	0	0	0	0	0	0	-8.75057	0	0	0	-7.13579	0	0	0	0	0	0	0	0	0	0	0	0	0	0	0	0	0	0	0	0	0
1	ADAM21	0	0	0	0	0	0	0	0	0	-7.49566	0	0	-7.70237	0	0	0	0	0	0	0	0	0	0	0	0	0	0	0	0	0	0	0	0	0	0
1	TEX10	0	0	0	0	0	0	0	0	0	-7.75795	0	0	-7.10492	0	0	0	0	0	0	0	0	0	0	0	0	0	0	0	0	0	0	0	0	0	0
1	SLC5A12	0	0	0	0	0	0	0	0	0	-9.46866	0	0	0	0	-7.45257	0	0	0	0	0	0	0	0	0	0	0	0	0	0	0	0	0	0	0	0
1	ZNF679	0	0	0	0	0	0	0	0	0	-10.4789	0	0	0	0	-7.69408	0	0	0	0	0	0	0	0	0	0	0	0	0	0	0	0	0	0	0	0
1	LIN28B	0	0	0	0	0	0	0	0	0	-12.2416	0	0	0	0	-7.81912	0	0	0	0	0	0	0	0	0	0	0	0	0	0	0	0	0	0	0	0
1	ZNF492	0	0	0	0	0	0	0	0	0	-7.09516	0	0	0	0	-7.28347	0	0	0	0	0	0	0	0	0	0	0	0	0	0	0	0	0	0	0	0
1	ZNF479	0	0	0	0	0	0	0	0	0	-7.27792	0	0	0	0	-7.55065	0	0	0	0	0	0	0	0	0	0	0	0	0	0	0	0	0	0	0	0
1	RNF157	0	0	0	0	0	0	0	0	0	-7.29319	0	0	0	0	-7.91341	0	0	0	0	0	0	0	0	0	0	0	0	0	0	0	0	0	0	0	0
1	CAD	0	0	0	0	0	0	0	0	0	-7.48348	0	0	0	0	-7.05535	0	0	0	0	0	0	0	0	0	0	0	0	0	0	0	0	0	0	0	0
1	RAB38	0	0	0	0	0	0	0	0	0	-7.6205	0	0	0	0	-7.07476	0	0	0	0	0	0	0	0	0	0	0	0	0	0	0	0	0	0	0	0
1	TTLL4	0	0	0	0	0	0	0	0	0	-9.60042	0	-7.12792	0	0	-7.07335	0	0	0	0	0	0	0	0	0	0	0	0	0	0	0	0	0	0	0	0
1	PBX2	0	0	0	0	0	0	0	0	0	-9.72076	0	-7.34675	0	0	-7.99444	0	0	0	0	0	0	0	0	0	0	0	0	0	0	0	0	0	0	0	0
1	SNRPE	0	0	0	0	0	0	0	0	0	-7.8493	0	-7.71643	0	0	-7.06742	0	0	0	0	0	0	0	0	0	0	0	0	0	0	0	0	0	0	0	0
1	CDAN1	0	0	0	0	0	0	0	0	0	-7.27508	0	-7.57918	0	0	-9.06975	0	0	0	0	0	0	0	0	0	0	0	0	0	0	0	0	0	0	0	0
1	SETDB1	0	-7.15936	0	0	0	0	0	0	0	-7.2073	0	-9.01102	0	0	-8.50284	0	0	0	0	0	0	0	0	0	0	0	0	0	0	0	0	0	0	0	0
1	MYEF2	0	0	0	0	0	0	0	0	0	-7.01769	0	-9.15079	-7.8026	0	-7.29285	0	0	0	0	0	0	0	0	0	0	0	0	0	0	0	0	0	0	0	0
1	SAMD13	0	0	0	0	0	0	0	0	0	-7.70879	0	-7.07078	0	0	0	0	0	0	0	0	0	0	0	0	0	0	0	0	0	0	0	0	0	0	0
1	PRDM11	0	0	0	0	0	0	0	0	-7.4673	-7.36189	0	-9.00559	0	-8.17627	-9.05484	0	0	0	0	0	0	0	0	0	0	0	0	0	0	0	0	0	0	0	0
1	TEX101	0	0	0	0	0	0	0	0	-7.43625	-9.76688	0	-7.54948	0	-7.97544	-9.22048	0	0	0	0	0	0	0	0	0	0	0	0	0	0	0	0	0	0	0	0
1	WDR35	0	0	0	0	0	0	0	0	-7.2189	-7.113	0	-7.13548	0	0	-7.49517	0	0	0	0	0	0	0	0	0	0	0	0	0	0	0	0	0	0	0	0
1	CYP2C8	0	0	0	0	0	0	0	0	-7.07288	0	0	-7.17476	0	0	-7.14112	0	0	0	0	0	0	0	0	0	0	0	0	0	0	0	0	0	0	0	0
1	PRR3	0	0	0	0	0	0	0	0	-7.05537	0	0	-8.2226	0	0	-8.42787	0	0	0	0	0	0	0	0	0	0	0	0	0	0	0	0	0	0	0	0
1	ING5	0	0	0	0	0	0	0	0	-7.5058	0	0	-9.5409	0	0	-7.26792	0	0	0	0	0	0	0	0	0	0	0	0	0	0	0	0	0	0	0	0
1	ZNF496	0	0	0	0	0	0	0	0	0	0	0	-7.87994	0	-7.4314	0	0	0	0	0	0	0	0	0	0	0	0	0	0	0	0	0	0	0	0	0
1	POLR3B	0	0	0	0	0	0	0	0	0	0	0	-7.29046	0	-7.08816	-8.32463	0	0	0	0	0	0	0	0	0	0	0	0	0	0	0	0	0	0	0	0
1	L3MBTL	0	0	0	0	0	0	0	0	0	0	0	-9.22525	0	0	-7.34933	0	0	0	0	0	0	0	0	0	0	0	0	0	0	0	0	0	0	0	0
1	SOX12	0	0	0	0	0	0	0	0	0	0	0	-10.0343	0	0	-7.76416	0	0	0	0	0	0	0	0	0	0	0	0	0	0	0	0	0	0	0	0
1	ZFP41	0	0	0	0	0	0	0	0	0	0	0	-7.82911	0	0	-7.13861	0	0	0	0	0	0	0	0	0	0	0	0	0	0	0	0	0	0	0	0
1	NSUN7	0	0	0	0	0	0	0	0	0	0	0	-8.01125	0	0	-7.32766	0	0	0	0	0	0	0	0	0	0	0	0	0	0	0	0	0	0	0	0
1	TIGD1	0	0	0	0	0	0	0	0	0	0	0	-7.42894	0	0	-7.55988	0	0	0	0	0	0	0	0	0	0	0	0	0	0	0	0	0	0	0	0
1	ZNF493	0	0	0	0	0	0	0	0	0	0	0	-8.72714	0	0	-8.98575	0	0	0	0	0	0	0	0	0	0	0	0	0	0	0	0	0	0	0	0
1	ZNF43	0	0	0	0	0	0	0	0	0	0	0	-7.12727	0	0	-7.52121	0	0	0	0	0	0	0	0	0	0	0	0	0	0	0	0	0	0	0	0
1	GSTM2	0	0	0	0	0	0	0	0	0	0	0	-7.02791	0	0	-7.75791	0	0	0	0	0	0	0	0	0	0	0	0	0	0	0	0	0	0	0	0
1	RAVER2	0	0	0	0	0	0	0	0	0	0	0	-7.24165	0	0	-7.92946	0	0	0	0	0	0	0	0	0	0	0	0	0	0	0	0	0	0	0	0
1	FAM124A	0	0	0	0	0	0	0	0	0	0	0	-7.21407	0	0	-7.81373	0	0	0	0	0	0	0	0	0	0	0	0	0	0	0	0	0	0	0	0
1	ANKRD13B	0	0	0	0	0	0	0	0	0	0	0	0	0	-7.36043	0	0	0	0	0	0	0	0	0	0	0	0	0	0	0	0	0	0	0	0	0
1	GPR17	0	0	0	0	0	0	0	0	0	0	0	0	0	-7.64529	0	0	0	0	0	0	0	0	0	0	0	0	0	0	0	0	0	0	0	0	0
1	ACTR3B	0	0	0	0	0	0	0	0	0	0	0	0	0	-7.12593	0	0	0	0	0	0	0	0	0	0	0	0	0	0	0	0	0	0	0	0	0
1	PIK3R2	0	0	0	0	0	0	0	0	0	0	0	0	0	-7.11635	0	0	0	0	0	0	0	0	0	0	0	0	0	0	0	0	0	0	0	0	0
1	SLC6A13	0	0	0	0	0	0	0	0	0	0	0	0	0	-7.54977	0	0	0	0	0	0	0	0	0	0	0	0	0	0	0	0	0	0	0	0	0
1	MRPS9	0	0	0	0	0	0	0	0	0	0	0	0	-7.02186	-7.14217	0	0	0	0	0	0	0	0	0	0	0	0	0	0	0	0	0	0	0	0	0
1	GCSH	0	0	0	0	0	0	0	0	0	0	0	0	0	-7.28285	-7.1179	0	0	0	0	0	0	0	0	0	0	0	0	0	0	0	0	0	0	0	0
1	GDF10	0	0	0	0	0	0	0	0	0	0	0	0	0	-7.79685	-7.43503	0	0	0	0	0	0	0	0	0	0	0	0	0	0	0	0	0	0	0	0
1	SPIRE2	0	0	0	0	0	0	0	0	0	0	0	0	0	-7.20611	-7.40498	0	0	0	0	0	0	0	0	0	0	0	0	0	0	0	0	0	0	0	0
1	MYH6	0	0	0	0	0	0	0	0	0	0	0	0	0	-7.45345	-7.66129	0	0	0	0	0	0	0	0	0	0	0	0	0	0	0	0	0	0	0	0
1	FIZ1	0	0	0	0	0	0	0	0	0	0	0	0	0	-7.20077	-7.25042	0	0	0	0	0	0	0	0	0	0	0	0	0	0	0	0	0	0	0	0
1	TUB	0	0	0	0	0	0	0	0	0	0	0	0	0	-7.78433	-7.13331	0	0	0	0	0	0	0	0	0	0	0	0	0	0	0	0	0	0	0	0
1	ATP1A2	0	0	0	0	0	0	0	0	0	0	0	0	0	-8.21342	-7.65433	0	0	0	0	0	0	0	0	0	0	0	0	0	0	0	0	0	0	0	0
1	HPSE2	0	0	0	0	0	0	0	0	0	0	0	0	0	-8.23365	-7.31691	0	0	0	0	0	0	0	0	0	0	0	0	0	0	0	0	0	0	0	0
1	WNK2	0	0	0	0	0	0	0	0	0	0	0	0	0	-7.05602	-7.86433	0	0	0	0	0	0	0	0	0	0	0	0	0	0	0	0	0	0	0	0
1	BSN	0	0	0	0	0	0	0	0	0	0	0	0	0	-7.10351	-7.99005	0	0	0	0	0	0	0	0	0	0	0	0	0	0	0	0	0	0	0	0
1	IRAK1BP1	0	0	0	0	0	0	0	0	0	0	0	0	0	-7.04496	-7.63622	0	0	0	0	0	0	0	0	0	0	0	0	0	0	0	0	0	0	0	0
1	FAM110B	0	0	0	0	0	0	0	0	0	0	0	0	0	-7.28932	-7.95662	0	0	0	0	0	0	0	0	0	0	0	0	0	0	0	0	0	0	0	0
1	ANKRD46	0	0	0	0	0	0	0	0	0	0	0	0	0	-7.54594	-8.99	0	0	0	0	0	0	0	0	0	0	0	0	0	0	0	0	0	0	0	0
1	KCNIP3	0	0	0	0	0	0	0	0	0	0	0	0	0	-8.43679	-9.79079	0	0	0	0	0	0	0	0	0	0	0	0	0	0	0	0	0	0	0	0
1	ZNF92	0	0	0	0	0	0	0	0	0	0	0	0	0	0	-7.52988	0	0	0	0	0	0	0	0	0	0	0	0	0	0	0	0	0	0	0	0
1	SALL1	0	0	0	0	0	0	0	0	0	0	0	0	0	0	-7.72676	0	0	0	0	0	0	0	0	0	0	0	0	0	0	0	0	0	0	0	0
1	KBTBD7	0	0	0	0	0	0	0	0	0	0	0	0	0	0	-8.44313	0	0	0	0	0	0	0	0	0	0	0	0	0	0	0	0	0	0	0	0
1	KCNJ12	0	0	0	0	0	0	0	0	0	0	0	0	0	0	-8.28972	0	0	0	0	0	0	0	0	0	0	0	0	0	0	0	0	0	0	0	0
1	ZNF253	0	0	0	0	0	0	0	0	0	0	0	0	0	0	-8.06821	0	0	0	0	0	0	0	0	0	0	0	0	0	0	0	0	0	0	0	0
1	ZNF708	0	0	0	0	0	0	0	0	0	0	0	0	0	0	-8.0491	0	0	0	0	0	0	0	0	0	0	0	0	0	0	0	0	0	0	0	0
1	PBX4	0	0	0	0	0	0	0	0	0	0	0	0	0	0	-8.03018	0	0	0	0	0	0	0	0	0	0	0	0	0	0	0	0	0	0	0	0
1	CNTFR	0	0	0	0	0	0	0	0	0	0	0	0	0	0	-7.99506	0	0	0	0	0	0	0	0	0	0	0	0	0	0	0	0	0	0	0	0
1	NAALAD2	0	0	0	0	0	0	0	0	0	0	0	0	0	0	-7.03704	0	0	0	0	0	0	0	0	0	0	0	0	0	0	0	0	0	0	0	0
1	KBTBD6	0	0	0	0	0	0	0	0	0	0	0	0	0	0	-7.85797	0	0	0	0	0	0	0	0	0	0	0	0	0	0	0	0	0	0	0	0
1	TNNT3	0	0	0	0	0	0	0	0	0	0	0	0	0	0	-7.72849	0	0	0	0	0	0	0	0	0	0	0	0	0	0	0	0	0	0	0	0
1	ZNF100	0	0	0	0	0	0	0	0	0	0	0	0	0	0	-7.57297	0	0	0	0	0	0	0	0	0	0	0	0	0	0	0	0	0	0	0	0
1	NPR2	0	0	0	0	0	0	0	0	0	0	0	0	0	0	-7.44019	0	0	0	0	0	0	0	0	0	0	0	0	0	0	0	0	0	0	0	0
1	TMEM132B	0	0	0	0	0	0	0	0	0	0	0	0	0	0	-7.41542	0	0	0	0	0	0	0	0	0	0	0	0	0	0	0	0	0	0	0	0
1	DDX20	0	0	0	0	0	0	0	0	0	0	0	0	0	0	-7.37232	0	0	0	0	0	0	0	0	0	0	0	0	0	0	0	0	0	0	0	0
1	ZNF14	0	0	0	0	0	0	0	0	0	0	0	0	0	0	-7.36811	0	0	0	0	0	0	0	0	0	0	0	0	0	0	0	0	0	0	0	0
1	ZNF793	0	0	0	0	0	0	0	0	0	0	0	0	0	0	-7.3642	0	0	0	0	0	0	0	0	0	0	0	0	0	0	0	0	0	0	0	0
1	ZFYVE9	0	0	0	0	0	0	0	0	0	0	0	0	0	0	-7.34188	0	0	0	0	0	0	0	0	0	0	0	0	0	0	0	0	0	0	0	0
1	POGZ	0	0	0	0	0	0	0	0	0	0	0	0	0	0	-7.32623	0	0	0	0	0	0	0	0	0	0	0	0	0	0	0	0	0	0	0	0
1	TSPAN19	0	0	0	0	0	0	0	0	0	0	0	0	0	0	-7.2915	0	0	0	0	0	0	0	0	0	0	0	0	0	0	0	0	0	0	0	0
1	MAGI1	0	0	0	0	0	0	0	0	0	0	0	0	0	0	-7.27283	0	0	0	0	0	0	0	0	0	0	0	0	0	0	0	0	0	0	0	0
1	CLUL1	0	0	0	0	0	0	0	0	0	0	0	0	0	0	-7.22165	0	0	0	0	0	0	0	0	0	0	0	0	0	0	0	0	0	0	0	0
1	THYN1	0	0	0	0	0	0	0	0	0	0	0	0	0	0	-7.20193	0	0	0	0	0	0	0	0	0	0	0	0	0	0	0	0	0	0	0	0
1	LEFTY2	0	0	0	0	0	0	0	0	0	0	0	0	0	0	-7.13012	0	0	0	0	0	0	0	0	0	0	0	0	0	0	0	0	0	0	0	0
1	GCK	0	0	0	0	0	0	0	0	0	0	0	0	0	0	-7.10274	0	0	0	0	0	0	0	0	0	0	0	0	0	0	0	0	0	0	0	0
1	ADAMTS18	0	0	0	0	0	0	0	0	0	0	0	0	0	0	-7.05157	0	0	0	0	0	0	0	0	0	0	0	0	0	0	0	0	0	0	0	0
1	2011-03-11	0	0	0	0	0	0	0	0	0	0	0	0	0	0	-7.02771	0	0	0	0	0	0	0	0	0	0	0	0	0	0	0	0	0	0	0	0
1	IL11RA	0	0	0	0	0	0	0	0	0	0	0	0	0	0	-7.01412	0	0	0	0	0	0	0	0	0	0	0	0	0	0	0	0	0	0	0	0
1	GDAP1	0	0	0	0	0	0	0	0	0	0	0	0	0	0	-7.11178	0	0	0	0	0	0	0	0	0	0	0	0	0	0	0	0	0	0	0	0
1	ZC3HAV1L	0	0	0	0	0	0	0	0	0	0	0	0	0	0	-7.67764	0	0	0	0	0	0	0	0	0	0	0	0	0	0	0	0	0	0	0	0
1	SLIT1	0	0	0	0	0	0	0	0	0	0	0	0	0	0	-7.21518	0	0	0	0	0	0	0	0	0	0	0	0	0	0	0	0	0	0	0	0
1	KRTDAP	0	0	0	0	0	0	0	0	0	0	0	0	0	0	-7.34072	0	0	0	0	0	0	0	0	0	0	0	0	0	0	0	0	0	0	0	0
1	GLCCI1	0	0	0	0	0	0	0	0	0	0	0	0	0	0	-7.61163	0	0	0	0	0	0	0	0	0	0	0	0	0	0	0	0	0	0	0	0
1	MOSC1	0	0	0	0	0	0	0	0	0	0	0	0	0	0	-7.28004	0	0	0	0	0	0	0	0	0	0	0	0	0	0	0	0	0	0	0	0
1	PANK1	0	0	0	0	0	0	0	0	0	0	0	0	0	0	-7.241	0	0	0	0	0	0	0	0	0	0	0	0	0	0	0	0	0	0	0	0
1	KLHDC8A	0	0	0	0	0	0	0	0	0	0	0	0	0	0	-7.23098	0	0	0	0	0	0	0	0	0	0	0	0	0	0	0	0	0	0	0	0
1	ZNF594	0	0	0	0	0	0	0	0	0	0	0	0	0	0	-7.28413	0	0	0	0	0	0	0	0	0	0	0	0	0	0	0	0	0	0	0	0
1	GLI2	0	0	0	0	0	0	0	0	0	0	0	0	0	0	-7.01418	0	0	0	0	0	0	0	0	0	0	0	0	0	0	0	0	0	0	0	0
1	GSTM3	0	0	0	0	0	0	0	0	0	0	0	0	0	0	-7.68624	0	0	0	0	0	0	0	0	0	0	0	0	0	0	0	0	0	0	0	0
1	GNGT1	0	0	0	0	0	0	0	0	0	0	0	0	0	0	-8.19945	0	0	0	0	0	0	0	0	0	0	0	0	0	0	0	0	0	0	0	0
1	ASTN1	0	0	0	0	0	0	0	0	0	0	0	0	0	0	-7.95553	0	0	0	0	0	0	0	0	0	0	0	0	0	0	0	0	0	0	0	0
1	TYRO3	0	0	0	0	0	0	0	0	0	0	0	0	0	0	-8.31909	0	0	0	0	0	0	0	0	0	0	0	0	0	0	0	0	0	0	0	0
1	GAL3ST3	0	0	0	0	0	0	0	0	0	0	0	0	0	0	-8.47784	0	0	0	0	0	0	0	0	0	0	0	0	0	0	0	0	0	0	0	0
1	ZNF248	0	0	0	0	0	0	0	0	0	0	0	0	0	0	-7.1196	0	0	0	0	0	0	0	0	0	0	0	0	0	0	0	0	0	0	0	0
1	GRB14	0	0	0	0	0	0	0	0	0	0	0	0	0	0	-7.07601	0	0	0	0	0	0	0	0	0	0	0	0	0	0	0	0	0	0	0	0
1	NELL1	0	0	0	0	0	0	0	0	0	0	0	0	0	0	-8.18249	0	0	0	0	0	0	0	0	0	0	0	0	0	0	0	0	0	0	0	0
1	SCUBE3	0	0	0	0	0	0	0	0	0	0	0	0	0	0	-7.02862	0	0	0	0	0	0	0	0	0	0	0	0	0	0	0	0	0	0	0	0
1	ZNF74	0	0	0	0	0	0	0	0	0	0	0	0	0	0	-7.11968	0	0	0	0	0	0	0	0	0	0	0	0	0	0	0	0	0	0	0	0
1	RASL11B	0	0	0	0	0	0	0	0	0	0	0	0	0	0	-8.28802	0	0	0	0	0	0	0	0	0	0	0	0	0	0	0	0	0	0	0	0
1	FLRT1	0	0	0	0	0	0	0	0	0	0	0	0	0	0	-7.70015	0	0	0	0	0	0	0	0	0	0	0	0	0	0	0	0	0	0	0	0
1	MED28	0	0	0	0	0	0	0	0	0	-9.55916	0	0	0	0	0	0	0	0	0	0	0	0	0	0	0	0	0	0	0	0	0	0	0	0	0
1	TFDP2	0	0	0	0	0	0	0	0	0	-10.1901	0	0	0	0	0	0	0	0	0	0	0	0	0	0	0	0	0	0	0	0	0	0	0	0	0
1	VPS33A	0	0	0	0	0	0	0	0	0	-8.94969	0	0	0	0	0	0	0	0	0	0	0	0	0	0	0	0	0	0	0	0	0	0	0	0	0
1	E2F5	0	0	0	0	0	0	0	0	0	-8.94922	0	0	0	0	0	0	0	0	0	0	0	0	0	0	0	0	0	0	0	0	0	0	0	0	0
1	DPH3	0	0	0	0	0	0	0	0	0	-7.48132	0	0	0	0	0	0	0	0	0	0	0	0	0	0	0	0	0	0	0	0	0	0	0	0	0
1	FAM119A	0	0	0	0	0	0	0	0	0	-8.33682	0	0	0	0	0	0	0	0	0	0	0	0	0	0	0	0	0	0	0	0	0	0	0	0	0
1	XPO5	0	0	0	0	0	0	0	0	0	-8.17301	0	0	0	0	0	0	0	0	0	0	0	0	0	0	0	0	0	0	0	0	0	0	0	0	0
1	GLMN	0	0	0	0	0	0	0	0	0	-8.15917	0	0	0	0	0	0	0	0	0	0	0	0	0	0	0	0	0	0	0	0	0	0	0	0	0
1	FANCE	0	0	0	0	0	0	0	0	0	-8.11147	0	0	0	0	0	0	0	0	0	0	0	0	0	0	0	0	0	0	0	0	0	0	0	0	0
1	NEK3	0	0	0	0	0	0	0	0	0	-8.01935	0	0	0	0	0	0	0	0	0	0	0	0	0	0	0	0	0	0	0	0	0	0	0	0	0
1	TP53TG3	0	0	0	0	0	0	0	0	0	-8.00641	0	0	0	0	0	0	0	0	0	0	0	0	0	0	0	0	0	0	0	0	0	0	0	0	0
1	GPT2	0	0	0	0	0	0	0	0	0	-7.96583	0	0	0	0	0	0	0	0	0	0	0	0	0	0	0	0	0	0	0	0	0	0	0	0	0
1	SLC5A6	0	0	0	0	0	0	0	0	0	-7.94576	0	0	0	0	0	0	0	0	0	0	0	0	0	0	0	0	0	0	0	0	0	0	0	0	0
1	GPATCH3	0	0	0	0	0	0	0	0	0	-7.88748	0	0	0	0	0	0	0	0	0	0	0	0	0	0	0	0	0	0	0	0	0	0	0	0	0
1	SLC29A1	0	0	0	0	0	0	0	0	0	-7.83922	0	0	0	0	0	0	0	0	0	0	0	0	0	0	0	0	0	0	0	0	0	0	0	0	0
1	HSF2	0	0	0	0	0	0	0	0	0	-7.74081	0	0	0	0	0	0	0	0	0	0	0	0	0	0	0	0	0	0	0	0	0	0	0	0	0
1	PSTK	0	0	0	0	0	0	0	0	0	-7.71867	0	0	0	0	0	0	0	0	0	0	0	0	0	0	0	0	0	0	0	0	0	0	0	0	0
1	SUPT3H	0	0	0	0	0	0	0	0	0	-7.64846	0	0	0	0	0	0	0	0	0	0	0	0	0	0	0	0	0	0	0	0	0	0	0	0	0
1	IGF2BP3	0	0	0	0	0	0	0	0	0	-7.42899	0	0	0	0	0	0	0	0	0	0	0	0	0	0	0	0	0	0	0	0	0	0	0	0	0
1	UCHL1	0	0	0	0	0	0	0	0	0	-7.55922	0	0	0	0	0	0	0	0	0	0	0	0	0	0	0	0	0	0	0	0	0	0	0	0	0
1	SARS2	0	0	0	0	0	0	0	0	0	-7.53338	0	0	0	0	0	0	0	0	0	0	0	0	0	0	0	0	0	0	0	0	0	0	0	0	0
1	DGUOK	0	0	0	0	0	0	0	0	0	-7.50465	0	0	0	0	0	0	0	0	0	0	0	0	0	0	0	0	0	0	0	0	0	0	0	0	0
1	RDBP	0	0	0	0	0	0	0	0	0	-7.48094	0	0	0	0	0	0	0	0	0	0	0	0	0	0	0	0	0	0	0	0	0	0	0	0	0
1	SNRPC	0	0	0	0	0	0	0	0	0	-7.47495	0	0	0	0	0	0	0	0	0	0	0	0	0	0	0	0	0	0	0	0	0	0	0	0	0
1	TSR1	0	0	0	0	0	0	0	0	0	-7.41702	0	0	0	0	0	0	0	0	0	0	0	0	0	0	0	0	0	0	0	0	0	0	0	0	0
1	PPP4C	0	0	0	0	0	0	0	0	0	-7.40269	0	0	0	0	0	0	0	0	0	0	0	0	0	0	0	0	0	0	0	0	0	0	0	0	0
1	CPSF3	0	0	0	0	0	0	0	0	0	-7.35365	0	0	0	0	0	0	0	0	0	0	0	0	0	0	0	0	0	0	0	0	0	0	0	0	0
1	NGRN	0	0	0	0	0	0	0	0	0	-7.26655	0	0	0	0	0	0	0	0	0	0	0	0	0	0	0	0	0	0	0	0	0	0	0	0	0
1	NRAS	0	0	0	0	0	0	0	0	0	-7.17088	0	0	0	0	0	0	0	0	0	0	0	0	0	0	0	0	0	0	0	0	0	0	0	0	0
1	SLC13A4	0	0	0	0	0	0	0	0	0	-7.16134	0	0	0	0	0	0	0	0	0	0	0	0	0	0	0	0	0	0	0	0	0	0	0	0	0
1	ZNF35	0	0	0	0	0	0	0	0	0	-7.06647	0	0	0	0	0	0	0	0	0	0	0	0	0	0	0	0	0	0	0	0	0	0	0	0	0
1	CBX8	0	0	0	0	0	0	0	0	0	-7.02897	0	0	0	0	0	0	0	0	0	0	0	0	0	0	0	0	0	0	0	0	0	0	0	0	0
1	COIL	0	0	0	0	0	0	0	0	0	-7.1236	0	0	0	0	0	0	0	0	0	0	0	0	0	0	0	0	0	0	0	0	0	0	0	0	0
1	ANKRD45	0	0	0	0	0	0	0	0	0	-7.19105	0	0	0	0	0	0	0	0	0	0	0	0	0	0	0	0	0	0	0	0	0	0	0	0	0
1	TNFRSF13C	0	0	0	0	0	0	0	0	0	-7.40467	0	0	0	0	0	0	0	0	0	0	0	0	0	0	0	0	0	0	0	0	0	0	0	0	0
1	POLB	0	0	0	0	0	0	0	0	0	-7.81227	0	0	0	0	0	0	0	0	0	0	0	0	0	0	0	0	0	0	0	0	0	0	0	0	0
1	ZNF71	0	0	0	0	0	0	0	0	0	-7.33299	0	0	0	0	0	0	0	0	0	0	0	0	0	0	0	0	0	0	0	0	0	0	0	0	0
1	CDK4	0	0	0	0	0	0	0	0	0	-7.66519	0	0	0	0	0	0	0	0	0	0	0	0	0	0	0	0	0	0	0	0	0	0	0	0	0
1	TARBP2	0	0	0	0	0	0	0	0	0	-8.1114	0	0	0	0	0	0	0	0	0	0	0	0	0	0	0	0	0	0	0	0	0	0	0	0	0
1	FOXP4	0	0	0	0	0	0	0	0	0	-7.099	0	0	0	0	0	0	0	0	0	0	0	0	0	0	0	0	0	0	0	0	0	0	0	0	0
1	DDOST	0	0	0	0	0	0	0	0	0	-7.5306	0	0	0	0	0	0	0	0	0	0	0	0	0	0	0	0	0	0	0	0	0	0	0	0	0
1	EMID1	0	0	0	0	0	0	0	0	0	-7.68129	0	0	0	0	0	0	0	0	0	0	0	0	0	0	0	0	0	0	0	0	0	0	0	0	0
1	AGBL5	0	0	0	0	0	0	0	0	0	-7.69149	0	0	0	0	0	0	0	0	0	0	0	0	0	0	0	0	0	0	0	0	0	0	0	0	0
1	SENP3	0	0	0	0	0	0	0	0	0	-7.08396	0	0	0	0	0	0	0	0	0	0	0	0	0	0	0	0	0	0	0	0	0	0	0	0	0
1	ANKRD7	0	0	0	0	0	0	0	0	0	-7.13218	0	0	0	0	0	0	0	0	0	0	0	0	0	0	0	0	0	0	0	0	0	0	0	0	0
1	CDC34	0	0	0	0	0	0	0	0	0	-7.14859	0	0	0	0	0	0	0	0	0	0	0	0	0	0	0	0	0	0	0	0	0	0	0	0	0
1	RPAIN	0	0	0	0	0	0	0	0	0	-8.59281	0	0	0	0	0	0	0	0	0	0	0	0	0	0	0	0	0	0	0	0	0	0	0	0	0
1	LIG3	0	0	0	0	0	0	0	0	0	-8.93632	0	0	0	0	0	0	0	0	0	0	0	0	0	0	0	0	0	0	0	0	0	0	0	0	0
1	CCDC34	0	0	0	0	0	0	0	0	0	-7.24254	0	0	0	0	0	0	0	0	0	0	0	0	0	0	0	0	0	0	0	0	0	0	0	0	0
1	KLHDC3	0	0	0	0	0	0	0	0	0	-7.82892	0	0	0	0	0	0	0	0	0	0	0	0	0	0	0	0	0	0	0	0	0	0	0	0	0
1	PLAGL2	0	0	0	0	0	0	0	0	0	-7.93377	0	0	0	0	0	0	0	0	0	0	0	0	0	0	0	0	0	0	0	0	0	0	0	0	0
1	USP39	0	0	0	0	0	0	0	0	0	-7.26428	0	0	0	0	0	0	0	0	0	0	0	0	0	0	0	0	0	0	0	0	0	0	0	0	0
1	GLS2	0	0	0	0	0	0	0	0	0	0	0	-8.54209	0	0	0	0	0	0	0	0	0	0	0	0	0	0	0	0	0	0	0	0	0	0	0
1	ALKBH2	0	0	0	0	0	0	0	0	0	0	0	-9.16246	0	0	0	0	0	0	0	0	0	0	0	0	0	0	0	0	0	0	0	0	0	0	0
1	BZRAP1	0	0	0	0	0	0	0	0	0	0	0	-8.46613	0	0	0	0	0	0	0	0	0	0	0	0	0	0	0	0	0	0	0	0	0	0	0
1	FUS	0	0	0	0	0	0	0	0	0	0	0	-8.34827	0	0	0	0	0	0	0	0	0	0	0	0	0	0	0	0	0	0	0	0	0	0	0
1	IQCC	0	0	0	0	0	0	0	0	0	0	0	-8.18561	0	0	0	0	0	0	0	0	0	0	0	0	0	0	0	0	0	0	0	0	0	0	0
1	EHMT2	0	0	0	0	0	0	0	0	0	0	0	-8.00531	0	0	0	0	0	0	0	0	0	0	0	0	0	0	0	0	0	0	0	0	0	0	0
1	FUZ	0	0	0	0	0	0	0	0	0	0	0	-8.00243	0	0	0	0	0	0	0	0	0	0	0	0	0	0	0	0	0	0	0	0	0	0	0
1	SPAG8	0	0	0	0	0	0	0	0	0	0	0	-7.94837	0	0	0	0	0	0	0	0	0	0	0	0	0	0	0	0	0	0	0	0	0	0	0
1	ZNF692	0	0	0	0	0	0	0	0	0	0	0	-7.92473	0	0	0	0	0	0	0	0	0	0	0	0	0	0	0	0	0	0	0	0	0	0	0
1	DDX11	0	0	0	0	0	0	0	0	0	0	0	-7.88376	0	0	0	0	0	0	0	0	0	0	0	0	0	0	0	0	0	0	0	0	0	0	0
1	WDR73	0	0	0	0	0	0	0	0	0	0	0	-7.77942	0	0	0	0	0	0	0	0	0	0	0	0	0	0	0	0	0	0	0	0	0	0	0
1	SLC24A5	0	0	0	0	0	0	0	0	0	0	0	-7.75287	0	0	0	0	0	0	0	0	0	0	0	0	0	0	0	0	0	0	0	0	0	0	0
1	TFAP4	0	0	0	0	0	0	0	0	0	0	0	-7.7352	0	0	0	0	0	0	0	0	0	0	0	0	0	0	0	0	0	0	0	0	0	0	0
1	FBL	0	0	0	0	0	0	0	0	0	0	0	-7.57568	0	0	0	0	0	0	0	0	0	0	0	0	0	0	0	0	0	0	0	0	0	0	0
1	CABC1	0	0	0	0	0	0	0	0	0	0	0	-7.56761	0	0	0	0	0	0	0	0	0	0	0	0	0	0	0	0	0	0	0	0	0	0	0
1	AAAS	0	0	0	0	0	0	0	0	0	0	0	-7.53025	0	0	0	0	0	0	0	0	0	0	0	0	0	0	0	0	0	0	0	0	0	0	0
1	PARS2	0	0	0	0	0	0	0	0	0	0	0	-7.52577	0	0	0	0	0	0	0	0	0	0	0	0	0	0	0	0	0	0	0	0	0	0	0
1	SFT2D3	0	0	0	0	0	0	0	0	0	0	0	-7.52008	0	0	0	0	0	0	0	0	0	0	0	0	0	0	0	0	0	0	0	0	0	0	0
1	SFRS16	0	0	0	0	0	0	0	0	0	0	0	-7.51891	0	0	0	0	0	0	0	0	0	0	0	0	0	0	0	0	0	0	0	0	0	0	0
1	SNRPA	0	0	0	0	0	0	0	0	0	0	0	-7.47685	0	0	0	0	0	0	0	0	0	0	0	0	0	0	0	0	0	0	0	0	0	0	0
1	RGS12	0	0	0	0	0	0	0	0	0	0	0	-7.43299	0	0	0	0	0	0	0	0	0	0	0	0	0	0	0	0	0	0	0	0	0	0	0
1	BRD8	0	0	0	0	0	0	0	0	0	0	0	-7.39664	0	0	0	0	0	0	0	0	0	0	0	0	0	0	0	0	0	0	0	0	0	0	0
1	ZNF337	0	0	0	0	0	0	0	0	0	0	0	-7.33735	0	0	0	0	0	0	0	0	0	0	0	0	0	0	0	0	0	0	0	0	0	0	0
1	TSEN2	0	0	0	0	0	0	0	0	0	0	0	-7.32466	0	0	0	0	0	0	0	0	0	0	0	0	0	0	0	0	0	0	0	0	0	0	0
1	CACHD1	0	0	0	0	0	0	0	0	0	0	0	-7.27543	0	0	0	0	0	0	0	0	0	0	0	0	0	0	0	0	0	0	0	0	0	0	0
1	LOC730092	0	0	0	0	0	0	0	0	0	0	0	-7.2435	0	0	0	0	0	0	0	0	0	0	0	0	0	0	0	0	0	0	0	0	0	0	0
1	HKR1	0	0	0	0	0	0	0	0	0	0	0	-7.24303	0	0	0	0	0	0	0	0	0	0	0	0	0	0	0	0	0	0	0	0	0	0	0
1	GAS8	0	0	0	0	0	0	0	0	0	0	0	-7.21784	0	0	0	0	0	0	0	0	0	0	0	0	0	0	0	0	0	0	0	0	0	0	0
1	ACAD10	0	0	0	0	0	0	0	0	0	0	0	-7.21588	0	0	0	0	0	0	0	0	0	0	0	0	0	0	0	0	0	0	0	0	0	0	0
1	CLK2	0	0	0	0	0	0	0	0	0	0	0	-7.16263	0	0	0	0	0	0	0	0	0	0	0	0	0	0	0	0	0	0	0	0	0	0	0
1	NAB2	0	0	0	0	0	0	0	0	0	0	0	-7.14239	0	0	0	0	0	0	0	0	0	0	0	0	0	0	0	0	0	0	0	0	0	0	0
1	JRK	0	0	0	0	0	0	0	0	0	0	0	-7.11557	0	0	0	0	0	0	0	0	0	0	0	0	0	0	0	0	0	0	0	0	0	0	0
1	RAD9A	0	0	0	0	0	0	0	0	0	0	0	-7.10164	0	0	0	0	0	0	0	0	0	0	0	0	0	0	0	0	0	0	0	0	0	0	0
1	MYH7B	0	0	0	0	0	0	0	0	0	0	0	-7.09248	0	0	0	0	0	0	0	0	0	0	0	0	0	0	0	0	0	0	0	0	0	0	0
1	KIAA0495	0	0	0	0	0	0	0	0	0	0	0	-7.09076	0	0	0	0	0	0	0	0	0	0	0	0	0	0	0	0	0	0	0	0	0	0	0
1	TUT1	0	0	0	0	0	0	0	0	0	0	0	-7.06388	0	0	0	0	0	0	0	0	0	0	0	0	0	0	0	0	0	0	0	0	0	0	0
1	CDCA7L	0	0	0	0	0	0	0	0	0	0	0	-7.0632	0	0	0	0	0	0	0	0	0	0	0	0	0	0	0	0	0	0	0	0	0	0	0
1	MSH5	0	0	0	0	0	0	0	0	0	0	0	-7.05007	0	0	0	0	0	0	0	0	0	0	0	0	0	0	0	0	0	0	0	0	0	0	0
1	KIAA0406	0	0	0	0	0	0	0	0	0	0	0	-7.04403	0	0	0	0	0	0	0	0	0	0	0	0	0	0	0	0	0	0	0	0	0	0	0
1	CREB3L4	0	0	0	0	0	0	0	0	0	0	0	-7.59427	0	0	0	0	0	0	0	0	0	0	0	0	0	0	0	0	0	0	0	0	0	0	0
1	LOC442245	0	0	0	0	0	0	0	0	0	0	0	-7.5579	0	0	0	0	0	0	0	0	0	0	0	0	0	0	0	0	0	0	0	0	0	0	0
1	PATZ1	0	0	0	0	0	0	0	0	0	0	0	-7.06665	0	0	0	0	0	0	0	0	0	0	0	0	0	0	0	0	0	0	0	0	0	0	0
1	SMYD5	0	0	0	0	0	0	0	0	0	0	0	-7.33185	0	0	0	0	0	0	0	0	0	0	0	0	0	0	0	0	0	0	0	0	0	0	0
1	CROCC	0	0	0	0	0	0	0	0	0	0	0	-7.79138	0	0	0	0	0	0	0	0	0	0	0	0	0	0	0	0	0	0	0	0	0	0	0
1	CCHCR1	0	0	0	0	0	0	0	0	0	0	0	-7.30377	0	0	0	0	0	0	0	0	0	0	0	0	0	0	0	0	0	0	0	0	0	0	0
1	ZNF498	0	0	0	0	0	0	0	0	0	0	0	-7.53341	0	0	0	0	0	0	0	0	0	0	0	0	0	0	0	0	0	0	0	0	0	0	0
1	MKS1	0	0	0	0	0	0	0	0	0	0	0	-7.713	0	0	0	0	0	0	0	0	0	0	0	0	0	0	0	0	0	0	0	0	0	0	0
1	ZNF202	0	0	0	0	0	0	0	0	0	0	0	-8.11865	0	0	0	0	0	0	0	0	0	0	0	0	0	0	0	0	0	0	0	0	0	0	0
1	POLD2	0	0	0	0	0	0	0	0	0	0	0	-7.47179	0	0	0	0	0	0	0	0	0	0	0	0	0	0	0	0	0	0	0	0	0	0	0
1	KIAA0907	0	0	0	0	0	0	0	0	0	0	0	-7.19014	0	0	0	0	0	0	0	0	0	0	0	0	0	0	0	0	0	0	0	0	0	0	0
1	ZNF767	0	0	0	0	0	0	0	0	0	0	0	-7.1863	0	0	0	0	0	0	0	0	0	0	0	0	0	0	0	0	0	0	0	0	0	0	0
1	ZNF239	0	0	0	0	0	0	0	0	0	0	0	-7.66568	0	0	0	0	0	0	0	0	0	0	0	0	0	0	0	0	0	0	0	0	0	0	0
1	PPOX	0	0	0	0	0	0	0	0	0	0	0	-7.96495	0	0	0	0	0	0	0	0	0	0	0	0	0	0	0	0	0	0	0	0	0	0	0
1	ZNF391	0	0	0	0	0	0	0	0	0	0	0	-7.43082	0	0	0	0	0	0	0	0	0	0	0	0	0	0	0	0	0	0	0	0	0	0	0
1	MCM3APAS	0	0	0	0	0	0	0	0	0	0	0	-7.28522	0	0	0	0	0	0	0	0	0	0	0	0	0	0	0	0	0	0	0	0	0	0	0
1	CEP68	0	0	0	0	0	0	0	0	0	0	0	-7.4117	0	0	0	0	0	0	0	0	0	0	0	0	0	0	0	0	0	0	0	0	0	0	0
1	BBS1	0	0	0	0	0	0	0	0	0	0	0	-7.30866	0	0	0	0	0	0	0	0	0	0	0	0	0	0	0	0	0	0	0	0	0	0	0
1	FAM113A	0	0	0	0	0	0	0	0	0	0	0	-8.11492	0	0	0	0	0	0	0	0	0	0	0	0	0	0	0	0	0	0	0	0	0	0	0
1	ZNF208	0	0	0	0	0	0	0	0	0	0	0	-7.20331	0	0	0	0	0	0	0	0	0	0	0	0	0	0	0	0	0	0	0	0	0	0	0
1	CCT8L2	0	0	0	0	0	0	0	0	0	0	0	-7.05114	0	0	0	0	0	0	0	0	0	0	0	0	0	0	0	0	0	0	0	0	0	0	0
1	RAD52	0	0	0	0	0	0	0	0	0	0	0	-7.02425	0	0	0	0	0	0	0	0	0	0	0	0	0	0	0	0	0	0	0	0	0	0	0
1	VWA2	0	0	0	0	0	0	0	0	0	0	0	-7.75313	0	0	0	0	0	0	0	0	0	0	0	0	0	0	0	0	0	0	0	0	0	0	0
1	LRRFIP1	0	0	0	0	0	0	0	0	0	0	0	0	0	0	0	0	0	0	0	0	0	-7.56373	-7.16314	0	0	0	0	0	0	-7.28187	-7.69503	0	-7.04724	0	-8.58735
1	TLR5	0	0	0	0	0	0	0	0	0	0	0	0	0	0	0	0	0	0	0	0	0	-7.78885	0	0	0	0	0	0	0	0	-7.18818	0	-8.85769	0	-7.47878
1	MBNL1	0	0	0	0	0	0	0	0	0	0	0	0	0	0	0	0	0	0	0	0	0	0	0	0	0	0	0	0	0	0	0	0	-7.38935	0	-7.50655
1	AHNAK	0	0	0	0	0	0	0	0	0	0	0	0	0	0	0	0	0	0	0	0	0	0	0	0	0	0	-7.90891	0	0	0	0	0	-10.6969	0	-8.99537
1	SMARCA2	0	0	0	0	0	0	0	0	0	0	0	0	0	0	0	0	0	0	0	0	0	-8.3601	0	0	0	0	0	0	0	0	0	0	-7.45648	0	0
1	NRP2	0	0	0	0	0	0	0	0	0	0	0	0	0	0	0	0	0	0	0	0	-7.60202	-8.82312	0	0	0	0	0	-7.10373	0	0	0	0	-7.23239	0	0
1	PLA2R1	0	0	0	0	0	0	0	0	0	0	0	0	0	0	0	0	0	0	0	0	-7.04631	0	0	0	0	0	0	0	0	0	0	0	-7.13287	0	0
1	CLU	0	0	0	0	0	0	0	0	0	0	0	0	0	0	0	0	0	0	0	0	0	0	0	0	0	0	0	0	0	0	0	0	-7.28991	0	0
1	ZBTB20	0	0	0	0	0	0	0	0	0	0	0	0	0	0	0	0	0	0	0	0	0	0	0	0	0	0	0	0	0	0	0	0	-8.83909	0	0
1	TXNIP	0	0	0	0	0	0	0	0	0	0	0	0	0	0	0	0	0	0	0	0	0	0	0	0	0	0	0	0	0	0	0	0	-7.68687	0	0
1	TGOLN2	0	0	0	0	0	0	0	0	0	0	0	0	0	0	0	0	0	0	0	0	0	0	0	0	0	0	0	0	0	0	0	0	-7.23189	0	0
1	CREBL2	0	0	0	0	0	0	0	0	0	0	0	0	0	0	0	0	0	0	0	0	0	0	0	0	0	0	0	0	0	0	0	0	-7.21343	0	0
1	ZBTB38	0	0	0	0	0	0	0	0	0	0	0	0	0	0	0	0	0	0	0	0	0	0	0	0	0	0	0	0	0	0	0	0	-7.19314	0	0
1	ALDH3B1	0	0	0	0	0	0	0	0	0	0	0	0	0	0	0	0	0	0	0	0	0	0	0	0	0	0	0	0	0	0	0	0	-7.10049	0	0
1	RASSF5	0	0	0	0	0	0	0	0	0	0	0	0	0	0	0	0	0	0	0	0	0	0	0	0	0	0	0	0	0	0	0	0	-7.01601	0	0
1	ZNF608	0	0	0	0	0	0	0	0	0	0	0	0	-8.07209	0	0	0	0	0	0	0	0	0	0	0	0	0	0	0	0	0	0	0	0	0	0
1	EYA4	0	0	0	0	0	0	0	0	0	0	0	0	-7.82748	0	0	0	0	0	0	0	0	0	0	0	0	0	0	0	0	0	0	0	0	0	0
1	JUB	0	0	0	0	0	0	0	0	0	0	0	0	-7.88103	0	0	0	0	0	0	0	0	0	0	0	0	0	0	0	0	0	0	0	0	0	0
1	CKB	0	0	0	0	0	0	0	0	0	0	0	0	-7.34842	0	0	0	0	0	0	0	0	0	0	0	0	0	0	0	0	0	0	0	0	0	0
1	BAZ2B	0	0	0	0	0	0	0	0	0	0	0	0	-7.01383	0	0	0	0	0	0	0	0	0	0	0	0	0	0	0	0	0	0	0	0	0	0
1	GYLTL1B	0	0	0	0	0	0	0	0	0	0	0	0	-7.15276	0	0	0	0	0	0	0	0	0	0	0	0	0	0	0	0	0	0	0	0	0	0
1	PRKCE	0	0	0	0	0	0	0	0	0	0	0	0	-7.4021	0	0	0	0	0	0	0	0	0	0	0	0	0	0	0	0	0	0	0	0	0	0
1	PCP4	0	0	0	0	0	0	0	0	0	0	0	0	-7.42704	0	0	0	0	0	0	0	0	0	0	0	0	0	0	0	0	0	0	0	0	0	0
1	PSAT1	0	0	0	0	0	0	0	0	0	0	0	0	-7.37052	0	0	0	0	0	0	0	0	0	0	0	0	0	0	0	0	0	0	0	0	0	0
1	ZBED3	0	0	0	0	0	0	0	0	0	0	0	0	-7.54224	0	-7.40304	0	0	0	0	0	0	0	0	0	0	0	0	0	0	0	0	0	0	0	0
1	DMRT3	0	0	-7.1484	0	0	0	0	0	0	0	0	0	0	0	0	0	0	0	0	0	0	0	0	0	0	0	0	0	0	0	0	0	0	0	0
1	TMEM45A	0	0	-7.55791	0	0	0	0	0	0	0	0	0	0	0	0	0	0	0	0	0	0	0	0	0	0	0	0	0	0	0	0	0	0	0	0
1	NT5DC2	0	0	-8.07287	0	0	0	0	0	0	0	0	0	0	0	0	0	0	0	0	0	0	0	0	0	0	0	0	0	0	0	0	0	0	0	0
1	SC65	0	0	-8.62846	0	0	0	0	0	0	0	0	0	0	0	0	0	0	0	0	0	0	0	0	0	0	0	0	0	0	0	0	0	0	0	0
1	MCAM	0	0	-7.8306	0	0	0	0	0	0	0	0	0	0	0	0	0	0	0	0	0	0	0	0	0	0	0	0	0	0	0	0	0	0	0	0
1	EPHB4	0	0	-7.47623	0	0	0	0	0	0	0	0	0	0	0	0	0	0	0	0	0	0	0	0	0	0	0	0	0	0	0	0	0	0	0	0
1	PLOD1	0	0	-7.38831	0	0	0	0	0	0	0	0	0	0	0	0	0	0	0	0	0	0	0	0	0	0	0	0	0	0	0	0	0	0	0	0
1	ARHGEF19	0	0	-7.20208	0	0	0	0	0	0	0	0	0	0	0	0	0	0	0	0	0	0	0	0	0	0	0	0	0	0	0	0	0	0	0	0
1	KIRREL	0	0	-7.17441	0	0	0	0	0	0	0	0	0	0	0	0	0	0	0	0	0	0	0	0	0	0	0	0	0	0	0	0	0	0	0	0
1	FAM57A	0	0	-7.13067	0	0	0	0	0	0	0	0	0	0	0	0	0	0	0	0	0	0	0	0	0	0	0	0	0	0	0	0	0	0	0	0
1	NTF3	0	0	-7.12612	0	0	0	0	0	0	0	0	0	0	0	0	0	0	0	0	0	0	0	0	0	0	0	0	0	0	0	0	0	0	0	0
1	CDK6	0	0	-7.04056	0	0	0	0	0	0	0	0	0	0	0	0	0	0	0	0	0	0	0	0	0	0	0	0	0	0	0	0	0	0	0	0
1	PTK7	0	0	-7.06766	0	0	0	0	0	0	0	0	0	0	0	0	0	0	0	0	0	0	0	0	0	0	0	0	0	0	0	0	0	0	0	0
1	MYH10	0	0	-7.09758	0	0	0	0	0	0	0	0	0	0	0	0	0	0	0	0	0	0	0	0	0	0	0	0	0	0	0	0	0	0	0	0
1	MSH6	0	0	-7.01355	0	0	0	0	0	0	0	0	0	0	0	0	0	0	0	0	0	0	0	0	0	0	0	0	0	0	0	0	0	0	0	0
1	CDKN1A	0	0	0	0	0	0	0	0	0	0	0	0	0	0	0	0	0	0	0	0	0	0	0	-8.57553	0	0	0	0	0	0	0	0	0	0	0
1	RAPH1	0	0	0	0	0	0	0	0	0	0	0	0	0	0	0	0	0	0	0	0	0	0	0	-8.9009	0	0	0	0	0	0	0	0	0	0	0
1	SLC20A1	0	0	0	0	0	0	0	0	0	0	0	0	0	0	0	0	0	0	0	0	0	0	0	-7.07761	0	0	0	0	0	0	0	0	0	0	0
1	COL1A2	0	0	0	0	0	0	0	0	0	0	0	0	0	0	0	0	0	0	0	0	0	0	0	-7.16804	0	0	0	0	0	0	0	0	0	0	0
1	FZD1	0	0	0	0	0	0	0	0	0	0	0	0	0	0	0	0	0	0	0	0	0	0	0	-7.04724	0	0	0	0	0	0	0	0	0	0	0
1	SULF2	0	0	0	0	0	0	0	0	0	0	0	0	0	0	0	0	0	0	0	0	0	0	0	-7.82141	0	0	0	0	0	0	0	0	0	0	0
1	LOC541471	0	0	0	0	0	0	0	0	0	0	0	0	0	0	0	0	0	0	0	0	0	0	0	-7.71892	0	0	0	0	0	0	0	0	0	0	0
1	ENC1	0	0	0	0	0	0	0	0	0	0	0	0	0	0	0	0	0	0	0	0	0	0	0	-7.41737	0	0	0	0	0	0	0	0	0	0	0
1	SIPA1L2	0	0	0	0	0	0	0	0	0	0	0	0	0	0	0	0	0	0	0	0	0	0	0	-7.31478	0	0	0	0	0	0	0	0	0	0	0
1	ACSL3	0	0	0	0	0	0	0	0	0	0	0	0	0	0	0	0	0	0	0	0	0	0	0	-7.22412	0	0	0	0	0	0	0	0	0	0	0
1	COL5A1	0	0	0	0	0	0	0	0	0	0	0	0	0	0	0	0	0	0	0	0	0	0	0	-7.20052	0	0	0	0	0	0	0	0	0	0	0
1	ADCY7	0	0	0	0	0	0	0	0	0	0	0	0	0	0	0	0	0	0	0	0	0	0	0	-7.10521	0	0	0	0	0	0	0	0	0	0	0
1	CH25H	0	0	0	0	0	0	0	0	0	0	0	0	0	0	0	0	0	0	0	0	0	0	0	-7.05166	0	0	0	0	0	0	0	0	0	0	0
1	BAG3	0	0	0	0	0	0	0	0	0	0	0	0	0	0	0	0	0	0	0	0	0	0	0	-7.04784	0	0	0	0	0	0	0	0	0	0	0
1	SERTAD1	0	0	0	0	0	0	0	0	0	0	0	0	0	0	0	0	0	0	0	0	0	0	0	-7.30762	0	0	0	0	0	0	0	0	0	0	0
1	PGM2L1	0	0	0	0	0	0	0	0	0	0	0	0	0	0	0	0	0	0	0	0	0	0	0	-7.39513	0	0	0	0	0	0	0	0	0	0	0
1	CHST11	0	0	0	0	0	0	0	0	0	0	0	0	0	0	0	0	0	0	0	0	0	0	0	-7.40322	0	0	0	0	0	0	0	0	0	0	0
1	LOC552889	0	-7.56549	0	0	0	-7.40766	0	-7.04534	0	0	0	0	0	0	0	0	0	0	0	0	0	0	0	0	0	0	0	0	0	0	0	0	0	0	0
1	KHDRBS1	-7.23345	-8.28517	0	0	0	-7.1904	0	0	0	0	0	0	0	0	0	0	0	0	0	0	0	0	0	0	0	0	0	0	0	0	0	0	0	0	0
1	ADAMTS19	0	0	-7.03463	0	0	-7.18514	0	0	0	0	0	0	0	0	0	0	0	0	0	0	0	0	0	0	0	0	0	0	0	0	0	0	0	0	0
1	CRISPLD1	0	-8.37483	-8.81289	0	0	-7.82391	0	0	0	0	0	0	0	0	0	0	0	0	0	0	0	0	0	0	0	0	0	0	0	0	0	0	0	0	0
1	PUM2	0	0	0	0	0	-7.61793	0	0	0	0	0	0	0	0	0	0	0	0	0	0	0	0	0	0	0	0	0	0	0	0	0	0	0	0	0
1	MGC21881	0	0	0	0	0	-7.65785	0	0	0	0	0	0	0	0	0	0	0	0	0	0	0	0	0	0	0	0	0	0	0	0	0	0	0	0	0
1	MRPS27	0	0	0	0	0	-7.54941	0	0	0	0	0	0	0	0	0	0	0	0	0	0	0	0	0	0	0	0	0	0	0	0	0	0	0	0	0
1	RPRM	0	0	0	0	0	-7.48368	0	0	0	0	0	0	0	0	0	0	0	0	0	0	0	0	0	0	0	0	0	0	0	0	0	0	0	0	0
1	ZDHHC17	0	0	0	0	0	-7.46164	0	0	0	0	0	0	0	0	0	0	0	0	0	0	0	0	0	0	0	0	0	0	0	0	0	0	0	0	0
1	NAP1L1	0	0	0	0	0	-7.28963	0	0	0	0	0	0	0	0	0	0	0	0	0	0	0	0	0	0	0	0	0	0	0	0	0	0	0	0	0
1	MPDZ	0	0	0	0	0	-7.22491	0	0	0	0	0	0	0	0	0	0	0	0	0	0	0	0	0	0	0	0	0	0	0	0	0	0	0	0	0
1	ZNF512	0	0	0	0	0	-7.07694	0	0	0	0	0	0	0	0	0	0	0	0	0	0	0	0	0	0	0	0	0	0	0	0	0	0	0	0	0
1	LRIG2	0	0	0	0	0	-7.05048	0	0	0	0	0	0	0	0	0	0	0	0	0	0	0	0	0	0	0	0	0	0	0	0	0	0	0	0	0
1	RBM8A	0	0	0	0	0	-7.02987	0	0	0	0	0	0	0	0	0	0	0	0	0	0	0	0	0	0	0	0	0	0	0	0	0	0	0	0	0
1	LRRC49	0	0	0	0	0	-7.47032	0	0	0	0	0	0	0	0	0	0	0	0	0	0	0	0	0	0	0	0	0	0	0	0	0	0	0	0	0
1	ENPP6	0	0	0	0	0	-7.10868	0	0	0	0	0	0	0	0	0	0	0	0	0	0	0	0	0	0	0	0	0	0	0	0	0	0	0	0	0
1	CAMK1G	0	0	0	0	0	-7.14989	0	0	0	0	0	0	0	0	0	0	0	0	0	0	0	0	0	0	0	0	0	0	0	0	0	0	0	0	0
1	PTCD3	0	0	0	0	0	-7.07227	0	0	0	0	0	0	0	0	0	0	0	0	0	0	0	0	0	0	0	0	0	0	0	0	0	0	0	0	0
1	BDH2	0	0	0	0	0	-7.15688	0	0	0	0	0	0	0	0	0	0	0	0	0	0	0	0	0	0	0	0	0	0	0	0	0	0	0	0	0
1	THSD7B	0	0	0	0	0	-7.19467	0	0	0	0	0	0	0	0	0	0	0	0	0	0	0	0	0	0	0	0	0	0	0	0	0	0	0	0	0
1	MTHFD2L	0	0	0	0	0	-8.53698	0	0	0	0	0	0	0	0	0	0	0	0	0	0	0	0	0	0	0	0	0	0	0	0	0	0	0	0	0
1	SMARCAD1	0	0	0	0	0	-7.37882	0	0	0	-7.24894	0	0	0	0	0	0	0	0	0	0	0	0	0	0	0	0	0	0	0	0	0	0	0	0	0
1	SLC34A2	0	0	0	0	0	0	0	0	0	0	0	0	0	0	0	0	0	0	0	0	0	0	0	0	0	0	0	0	0	0	0	-7.09523	0	0	-7.95818
1	TNFAIP2	0	0	0	0	0	0	0	0	0	0	0	0	0	0	0	0	0	0	0	0	0	0	0	0	0	0	0	0	0	0	0	-7.43227	0	-7.96585	-7.31634
1	TSPO	0	0	0	0	0	0	0	0	0	0	0	0	0	0	0	0	0	0	0	0	0	0	0	0	0	0	0	0	0	0	0	0	0	-7.16822	-7.2043
1	STEAP3	0	0	0	0	0	0	0	0	0	0	0	0	0	0	0	0	0	0	0	0	0	0	0	0	0	0	0	0	0	0	0	0	0	-7.8482	-7.9608
1	KIF13B	0	0	0	0	0	0	0	0	0	0	0	0	0	0	0	0	0	0	0	0	0	0	0	0	0	0	0	0	0	0	0	0	0	-7.44226	-7.6665
1	ACSL5	0	0	0	0	0	0	0	0	0	0	0	0	0	0	0	0	0	0	0	0	0	0	0	0	0	0	0	0	0	0	0	0	0	-8.74768	-9.23388
1	LY75	0	0	0	0	0	0	0	0	0	0	0	0	0	0	0	0	0	0	0	0	0	0	0	0	0	0	0	0	0	0	0	0	0	-7.42412	-7.26706
1	MLPH	0	0	0	0	0	0	0	0	0	0	0	0	0	0	0	0	0	0	0	0	0	0	0	0	0	0	0	0	0	0	0	0	0	-8.36708	-8.28216
1	TRPM4	0	0	0	0	0	0	0	0	0	0	0	0	0	0	0	0	0	0	0	0	0	0	0	0	0	0	0	0	0	0	0	0	0	-9.1385	-7.39692
1	ALS2CL	0	0	0	0	0	0	0	0	0	0	0	0	0	0	0	0	0	0	0	0	0	0	0	0	0	0	0	0	0	0	0	0	0	0	-7.23852
1	ETV6	0	0	0	0	0	0	0	0	0	0	0	0	0	0	0	0	0	0	0	0	0	0	0	0	0	0	0	0	0	0	0	0	0	0	-7.30202
1	MYO18A	0	0	0	0	0	0	0	0	0	0	0	0	0	0	0	0	0	0	0	0	0	0	0	0	0	0	0	0	0	0	0	0	0	0	-8.10563
1	SEC14L2	0	0	0	0	0	0	0	0	0	0	0	0	0	0	0	0	0	0	0	0	0	0	0	0	0	0	0	0	0	0	0	0	0	0	-8.17538
1	KCNN4	0	0	0	0	0	0	0	0	0	0	0	0	0	0	0	0	0	0	0	0	0	0	0	0	0	0	0	0	0	0	0	0	0	0	-8.02309
1	FGD2	0	0	0	0	0	0	0	0	0	0	0	0	0	0	0	0	0	0	0	0	0	0	0	0	0	0	0	0	0	0	0	0	0	0	-7.71746
1	FRMD4B	0	0	0	0	0	0	0	0	0	0	0	0	0	0	0	0	0	0	0	0	0	0	0	0	0	0	0	0	0	0	0	0	0	0	-7.37296
1	TRIM56	0	0	0	0	0	0	0	0	0	0	0	0	0	0	0	0	0	0	0	0	0	0	0	0	0	0	0	0	0	0	0	0	0	0	-8.83071
1	RNF150	0	0	0	0	0	0	0	0	0	0	0	0	0	0	0	0	0	0	0	0	0	0	0	0	0	0	0	0	0	0	0	0	0	0	-7.34082
1	NXNL2	0	0	0	0	0	0	0	0	0	0	0	0	0	0	0	0	0	0	0	0	0	0	0	0	0	0	0	0	0	0	0	0	0	0	-7.15443
1	SYNPO	0	0	0	0	0	0	0	0	0	0	0	0	0	0	0	0	0	0	0	0	0	0	0	0	0	0	0	0	0	0	0	0	0	0	-7.06782
1	CX3CR1	0	0	0	0	0	0	0	0	0	0	0	0	0	0	0	0	0	0	0	0	0	0	0	0	0	0	0	0	0	0	0	0	0	0	-7.00518
1	PROM2	0	0	0	0	0	0	0	0	0	0	0	0	0	0	0	0	0	0	0	0	0	0	0	0	0	0	0	0	0	0	0	0	0	0	-7.16794
1	VPS13C	0	0	0	0	0	0	0	0	0	0	0	0	0	0	0	0	0	0	0	0	0	0	0	0	0	0	0	0	0	0	0	0	0	0	-7.20931
1	DOCK9	0	0	0	0	0	0	0	0	0	0	0	0	0	0	0	0	0	0	0	0	0	0	0	0	0	0	0	0	0	0	0	0	0	0	-7.48091
1	SLFN5	0	0	0	0	0	0	0	0	0	0	0	0	0	0	0	0	0	0	0	0	0	0	0	0	0	0	0	0	0	0	0	0	0	0	-7.83095
1	TMEM71	0	0	0	0	0	0	0	0	0	0	0	0	0	0	0	0	0	0	0	0	0	0	0	0	0	0	0	0	0	0	0	0	0	0	-7.11633
1	TRIM47	0	0	0	0	0	0	0	0	0	0	0	0	0	0	0	0	0	0	0	0	0	0	0	0	0	0	0	0	0	0	0	-7.30879	0	0	0
1	ASS1	0	0	0	0	0	0	0	0	0	0	0	0	0	0	0	0	0	0	0	0	0	0	0	0	0	0	0	0	0	0	0	-8.14409	0	0	0
1	TREX1	0	0	0	0	0	0	0	0	0	0	0	0	0	0	0	0	0	0	0	0	0	0	0	0	0	0	0	0	0	0	0	-8.25598	0	0	0
1	SAMD9L	0	0	0	0	0	0	0	0	0	0	0	0	0	0	0	0	0	0	0	0	0	0	0	0	0	0	0	0	0	0	0	-8.44627	0	0	0
1	CP	0	0	0	0	0	0	0	0	0	0	0	0	0	0	0	0	0	0	0	0	0	0	0	0	0	0	0	0	0	0	0	-7.89674	0	0	0
1	HLA-DOB	0	0	0	0	0	0	0	0	0	0	0	0	0	0	0	0	0	0	0	0	0	0	0	0	0	0	0	0	0	0	0	-7.48474	0	0	0
1	TMOD1	0	0	0	0	0	0	0	0	0	0	0	0	0	0	0	0	0	0	0	0	0	0	0	0	0	0	0	0	0	0	0	-8.57719	0	0	0
1	NFATC2IP	0	0	0	0	0	0	0	0	0	0	0	0	0	0	0	0	0	0	0	0	0	0	0	0	0	0	0	0	0	0	0	-8.32936	0	0	0
1	ZMYND15	0	0	0	0	0	0	0	0	0	0	0	0	0	0	0	0	0	0	0	0	0	0	0	0	0	0	0	0	0	0	0	-8.52347	0	0	0
1	IFI27	0	0	0	0	0	0	0	0	0	0	0	0	0	0	0	0	0	0	0	0	0	0	0	0	0	0	0	0	0	0	0	-7.88628	0	0	0
1	ALOX12P2	0	0	0	0	0	0	0	0	0	0	0	0	0	0	0	0	0	0	0	0	0	0	0	0	0	0	0	0	0	0	0	-7.98404	0	0	0
1	PARP12	0	0	0	0	0	0	0	0	0	0	0	0	0	0	0	0	0	0	0	0	0	0	0	0	0	0	0	0	0	0	0	-7.93863	0	0	0
1	CHI3L1	0	0	0	0	0	0	0	0	0	0	0	0	0	0	0	0	0	0	0	0	0	0	0	0	0	0	0	0	0	0	0	-7.81698	0	0	0
1	HPS3	0	0	0	0	0	0	0	0	0	0	0	0	0	0	0	0	0	0	0	0	0	0	0	0	0	0	0	0	0	0	0	-7.419	0	0	0
1	CASP8	0	0	0	0	0	0	0	0	0	0	0	0	0	0	0	0	0	0	0	0	0	0	0	0	0	0	0	0	0	0	0	-7.41094	0	0	0
1	TAPBPL	0	0	0	0	0	0	0	0	0	0	0	0	0	0	0	0	0	0	0	0	0	0	0	0	0	0	0	0	0	0	0	-7.28837	0	0	0
1	IRF7	0	0	0	0	0	0	0	0	0	0	0	0	0	0	0	0	0	0	0	0	0	0	0	0	0	0	0	0	0	0	0	-7.28128	0	0	0
1	PTGS1	0	0	0	0	0	0	0	0	0	0	0	0	0	0	0	0	0	0	0	0	0	0	0	0	0	0	0	0	0	0	0	-7.03782	0	0	0
1	NPR1	0	0	0	0	0	0	0	0	0	0	0	0	0	0	0	0	0	0	0	0	0	0	0	0	0	0	0	0	0	0	0	-7.71483	0	0	0
1	BBOX1	0	0	0	0	0	0	0	0	0	0	0	0	0	0	0	0	0	0	0	0	0	0	0	0	0	0	0	0	0	0	0	-7.2495	0	0	0
1	IFITM1	0	0	0	0	0	0	0	0	0	0	0	0	0	0	0	0	0	0	0	0	0	0	0	0	0	0	0	0	0	0	0	-7.36027	0	0	0
1	KLK7	0	0	0	0	0	0	0	0	0	0	0	0	0	0	0	0	0	0	0	0	0	0	0	0	0	-7.41346	0	0	0	0	0	-9.15078	0	0	0
1	ACAA1	0	0	0	0	0	0	0	0	0	0	0	0	0	0	0	0	0	0	0	0	0	0	0	0	0	0	0	0	0	0	0	0	0	-7.00719	0
1	ZDHHC24	0	0	0	0	0	0	0	0	0	0	0	0	0	0	0	0	0	0	0	0	0	0	0	0	0	0	0	0	0	0	0	0	0	-7.46355	0
1	SLC37A1	0	0	0	0	0	0	0	0	0	0	0	0	0	0	0	0	0	0	0	0	0	0	0	0	0	0	0	0	0	0	0	0	0	-8.57818	0
1	KIAA1244	0	0	0	0	0	0	0	0	0	0	0	0	0	0	0	0	0	0	0	0	0	0	0	0	0	0	0	0	0	0	0	0	0	-9.05372	0
1	GORASP1	0	0	0	0	0	0	0	0	0	0	0	0	0	0	0	0	0	0	0	0	0	0	0	0	0	0	0	0	0	0	0	0	0	-8.45263	0
1	GLYATL2	0	0	0	0	0	0	0	0	0	0	0	0	0	0	0	0	0	0	0	0	0	0	0	0	0	0	0	0	0	0	0	0	0	-8.41722	0
1	NANS	0	0	0	0	0	0	0	0	0	0	0	0	0	0	0	0	0	0	0	0	0	0	0	0	0	0	0	0	0	0	0	0	0	-8.13674	0
1	PTPN18	0	0	0	0	0	0	0	0	0	0	0	0	0	0	0	0	0	0	0	0	0	0	0	0	0	0	0	0	0	0	0	0	0	-8.02605	0
1	TCN1	0	0	0	0	0	0	0	0	0	0	0	0	0	0	0	0	0	0	0	0	0	0	0	0	0	0	0	0	0	0	0	0	0	-7.91731	0
1	ANPEP	0	0	0	0	0	0	0	0	0	0	0	0	0	0	0	0	0	0	0	0	0	0	0	0	0	0	0	0	0	0	0	0	0	-7.91185	0
1	MBD2	0	0	0	0	0	0	0	0	0	0	0	0	0	0	0	0	0	0	0	0	0	0	0	0	0	0	0	0	0	0	0	0	0	-7.87089	0
1	TMEM63A	0	0	0	0	0	0	0	0	0	0	0	0	0	0	0	0	0	0	0	0	0	0	0	0	0	0	0	0	0	0	0	0	0	-7.85193	0
1	STARD13	0	0	0	0	0	0	0	0	0	0	0	0	0	0	0	0	0	0	0	0	0	0	0	0	0	0	0	0	0	0	0	0	0	-7.08648	0
1	CDKN2B	0	0	0	0	0	0	0	0	0	0	0	0	0	0	0	0	0	0	0	0	0	0	0	0	0	0	0	0	0	0	0	0	0	-7.53153	0
1	TFEB	0	0	0	0	0	0	0	0	0	0	0	0	0	0	0	0	0	0	0	0	0	0	0	0	0	0	0	0	0	0	0	0	0	-7.31339	0
1	FBXW5	0	0	0	0	0	0	0	0	0	0	0	0	0	0	0	0	0	0	0	0	0	0	0	0	0	0	0	0	0	0	0	0	0	-7.19826	0
1	ZBTB7A	0	0	0	0	0	0	0	0	0	0	0	0	0	0	0	0	0	0	0	0	0	0	0	0	0	0	0	0	0	0	0	0	0	-7.19384	0
1	ITGB7	0	0	0	0	0	0	0	0	0	0	0	0	0	0	0	0	0	0	0	0	0	0	0	0	0	0	0	0	0	0	0	0	0	-7.14221	0
1	SCGB2A2	0	0	0	0	0	0	0	0	0	0	0	0	0	0	0	0	0	0	0	0	0	0	0	0	0	0	0	0	0	0	0	0	0	-7.0111	0
1	PDE8A	0	0	0	0	0	0	0	0	0	0	0	0	0	0	0	0	0	0	0	0	0	0	0	0	0	0	0	0	0	0	0	0	0	-7.25396	0
1	MOGAT2	0	0	0	0	0	0	0	0	0	0	0	0	0	0	0	0	0	0	0	0	0	0	0	0	0	0	0	0	0	0	0	0	0	-7.58785	0
1	CHST6	0	0	0	0	0	0	0	0	0	0	0	0	0	0	0	0	0	0	0	0	0	0	0	0	0	0	0	0	0	0	0	0	0	-7.20188	0
1	ABCA7	0	0	0	0	0	0	0	0	0	0	0	0	0	0	0	0	0	0	0	0	0	0	0	0	0	0	0	0	0	0	0	0	0	-7.12044	0
1	PPTC7	0	0	0	0	0	0	0	0	0	0	0	0	0	0	0	0	0	0	0	0	0	0	0	0	0	0	0	0	0	0	0	0	0	-7.09606	0
1	IRX3	0	0	0	0	0	0	0	0	0	0	0	0	0	0	0	0	0	0	0	0	0	0	0	0	0	0	0	0	0	0	0	0	0	-7.22672	0
1	PRRG4	0	0	0	0	0	0	0	0	0	0	0	0	0	0	0	0	0	0	0	0	0	0	0	0	0	0	0	0	0	0	0	0	0	-7.61576	0
1	ESRRA	0	0	0	0	0	0	0	0	0	0	0	0	0	0	0	0	0	0	0	0	0	0	0	0	0	0	0	0	0	0	0	0	0	-8.2107	0
1	TCTA	0	0	0	0	0	0	0	0	0	0	0	0	0	0	0	0	0	0	0	0	0	0	0	0	0	0	0	0	0	0	0	0	0	-7.04248	0
1	OPN4	0	0	0	0	0	0	0	0	0	0	0	0	0	0	0	0	0	0	0	0	0	0	0	0	0	0	0	0	0	0	0	0	0	-7.17371	0
1	GAS2L1	0	0	0	0	0	0	0	0	0	0	0	0	0	0	0	0	0	0	0	0	0	0	0	0	0	0	0	0	0	0	0	0	0	-7.27928	0
1	TRADD	0	0	0	0	0	0	0	0	0	0	0	0	0	0	0	0	0	0	0	0	0	0	0	0	0	0	0	0	0	0	0	0	0	-8.06436	0
1	PML	0	0	0	0	0	0	0	0	0	0	0	0	0	0	0	0	0	0	0	0	0	0	0	0	0	0	0	0	0	0	0	0	0	-7.01831	0
1	FUT3	0	0	0	0	0	0	0	0	0	0	0	0	0	0	0	0	0	0	0	0	0	0	0	0	0	0	0	0	0	0	0	0	0	-7.04903	0
1	ABHD3	0	0	0	0	0	0	0	0	0	0	0	0	0	0	0	0	0	0	0	0	0	0	0	0	0	0	0	0	-8.67723	0	0	0	0	0	0
1	ANKRD22	0	0	0	0	0	0	0	0	0	0	0	0	0	0	0	0	0	0	0	0	0	0	0	0	0	0	0	0	-9.36575	0	0	0	0	0	0
1	MTP18	0	0	0	0	0	0	0	0	0	0	0	0	0	0	0	0	0	0	0	0	0	0	0	0	0	0	0	0	-9.04137	0	0	0	0	0	0
1	PTPN1	0	0	0	0	0	0	0	0	0	0	0	0	0	0	0	0	0	0	0	0	0	0	0	0	0	0	0	0	-9.02487	0	0	0	0	0	0
1	PCTP	0	0	0	0	0	0	0	0	0	0	0	0	0	0	0	0	0	0	0	0	0	0	0	0	0	0	0	0	-7.66165	0	0	0	0	0	0
1	ISG20	0	0	0	0	0	0	0	0	0	0	0	0	0	0	0	0	0	0	0	0	0	0	0	0	0	0	0	0	-7.94269	0	0	0	0	0	0
1	ZNRF2	0	0	0	0	0	0	0	0	0	0	0	0	0	0	0	0	0	0	0	0	0	0	0	0	0	0	0	0	-8.14715	0	0	0	0	0	0
1	FAM105B	0	0	0	0	0	0	0	0	0	0	0	0	0	0	0	0	0	0	0	0	0	0	0	0	0	0	0	0	-7.90054	0	0	0	0	0	0
1	NUP210	0	0	0	0	0	0	0	0	0	0	0	0	0	0	0	0	0	0	0	0	0	0	0	0	0	0	0	0	-7.89221	0	0	0	0	0	0
1	GLRX	0	0	0	0	0	0	0	0	0	0	0	0	0	0	0	0	0	0	0	0	0	0	0	0	0	0	0	0	-7.0564	0	0	0	0	0	0
1	DBI	0	0	0	0	0	0	0	0	0	0	0	0	0	0	0	0	0	0	0	0	0	0	0	0	0	0	0	0	-7.7945	0	0	0	0	0	0
1	IDH3A	0	0	0	0	0	0	0	0	0	0	0	0	0	0	0	0	0	0	0	0	0	0	0	0	0	0	0	0	-7.63356	0	0	0	0	0	0
1	TFRC	0	0	0	0	0	0	0	0	0	0	0	0	0	0	0	0	0	0	0	0	0	0	0	0	0	0	0	0	-7.6265	0	0	0	0	0	0
1	CD3D	0	0	0	0	0	0	0	0	0	0	0	0	0	0	0	0	0	0	0	0	0	0	0	0	0	0	0	0	-7.52421	0	0	0	0	0	0
1	BAZ1A	0	0	0	0	0	0	0	0	0	0	0	0	0	0	0	0	0	0	0	0	0	0	0	0	0	0	0	0	-7.51755	0	0	0	0	0	0
1	DUS1L	0	0	0	0	0	0	0	0	0	0	0	0	0	0	0	0	0	0	0	0	0	0	0	0	0	0	0	0	-7.4702	0	0	0	0	0	0
1	BCAP29	0	0	0	0	0	0	0	0	0	0	0	0	0	0	0	0	0	0	0	0	0	0	0	0	0	0	0	0	-7.37308	0	0	0	0	0	0
1	GZMB	0	0	0	0	0	0	0	0	0	0	0	0	0	0	0	0	0	0	0	0	0	0	0	0	0	0	0	0	-7.29963	0	0	0	0	0	0
1	TMEM111	0	0	0	0	0	0	0	0	0	0	0	0	0	0	0	0	0	0	0	0	0	0	0	0	0	0	0	0	-7.11312	0	0	0	0	0	0
1	SIRPG	0	0	0	0	0	0	0	0	0	0	0	0	0	0	0	0	0	0	0	0	0	0	0	0	0	0	0	0	-7.0903	0	0	0	0	0	0
1	CBR1	0	0	0	0	0	0	0	0	0	0	0	0	0	0	0	0	0	0	0	0	0	0	0	0	0	0	0	0	-7.07865	0	0	0	0	0	0
1	VDAC1	0	0	0	0	0	0	0	0	0	0	0	0	0	0	0	0	0	0	0	0	0	0	0	0	0	0	0	0	-7.00865	0	0	0	0	0	0
1	CORO1C	0	0	0	0	0	0	0	0	0	0	0	0	0	0	0	0	0	0	0	0	0	0	0	0	0	0	0	0	-7.00106	0	0	0	0	0	0
1	PI4K2B	0	0	0	0	0	0	0	0	0	0	0	0	0	0	0	0	0	0	0	0	0	0	0	0	0	0	0	0	-7.34607	0	0	0	0	0	0
1	PRF1	0	0	0	0	0	0	0	0	0	0	0	0	0	0	0	0	0	0	0	0	0	0	0	0	0	0	0	0	-7.16384	0	0	0	0	0	0
1	NLRC5	0	0	0	0	0	0	0	0	0	0	0	0	0	0	0	0	0	0	0	0	0	0	0	0	0	0	0	0	-7.04526	0	0	0	0	0	0
1	BATF	0	0	0	0	0	0	0	0	0	0	0	0	0	0	0	0	0	0	0	0	0	0	0	0	0	0	0	0	-7.60106	0	0	0	0	0	0
1	BAK1	0	0	0	0	0	0	0	0	0	0	0	0	0	0	0	0	0	0	0	0	0	0	0	0	0	0	0	0	-7.79841	0	0	0	0	0	0
1	SHCBP1	0	0	0	0	0	0	0	0	0	0	0	0	0	0	0	0	0	0	0	0	0	0	0	0	0	0	0	0	-7.00563	0	0	0	0	0	0
1	SAR1B	0	0	0	0	0	0	0	0	0	0	0	0	0	0	0	0	0	0	0	0	0	0	0	0	0	0	0	0	-7.76394	0	0	0	0	0	0
1	ROD1	0	0	0	0	0	0	0	0	0	0	0	0	0	0	0	0	0	0	0	0	0	0	0	0	0	0	0	0	-7.90969	0	0	0	0	0	0
1	FAM100B	0	0	0	0	0	0	0	0	0	0	0	0	0	0	0	0	0	0	0	0	0	0	0	0	0	0	0	0	-8.5862	0	0	0	0	0	0
1	SLC26A6	0	0	0	0	0	0	0	0	0	0	0	0	0	0	0	0	0	0	0	0	0	0	0	0	0	0	0	0	-7.59827	0	0	0	0	0	0
1	CASP7	0	0	0	0	0	0	0	0	0	0	0	0	0	0	0	0	0	0	0	0	0	0	0	0	0	0	0	0	-7.10048	0	0	0	0	0	0
1	UPP1	0	0	0	0	0	0	0	0	0	0	0	0	0	0	0	0	0	0	0	0	0	0	0	-7.07074	0	0	0	-7.10295	-9.92716	0	0	0	0	0	0
1	RILP	0	0	0	0	0	0	0	0	0	0	0	0	0	0	0	0	0	0	0	0	0	0	0	0	0	0	0	0	-7.43294	0	0	0	0	-7.12162	0
1	CD44	0	0	0	0	0	0	0	0	0	0	0	0	0	0	0	0	0	0	0	0	0	0	0	0	0	0	0	0	-7.78693	0	0	0	0	-7.77017	0
1	HTATIP2	0	0	0	0	0	0	0	0	0	0	0	0	0	0	0	0	0	0	0	0	0	0	0	0	0	0	0	0	-7.91168	0	0	0	0	-7.10723	0
1	PMP22	0	0	0	0	0	0	0	0	0	0	0	0	0	0	0	0	0	0	0	0	-7.18013	-7.13993	0	0	0	0	0	0	0	0	0	0	0	0	0
1	ZMAT3	0	0	0	0	0	0	0	0	0	0	0	0	0	0	0	0	0	0	0	0	-7.20912	-7.07033	0	0	0	0	0	0	0	0	0	0	0	0	0
1	WISP1	0	0	0	0	0	0	0	0	0	0	0	0	0	0	0	0	0	0	0	0	-7.90499	-7.66406	0	0	0	0	0	0	0	0	0	0	0	0	0
1	ZNF469	0	0	0	0	0	0	0	0	0	0	0	0	0	0	0	0	0	0	0	0	-8.6546	-8.41554	0	0	0	0	0	0	0	0	0	0	0	0	0
1	PGCP	0	0	0	0	0	0	0	0	0	0	0	0	0	0	0	0	0	0	0	0	-7.78697	-7.5195	0	0	0	0	0	0	0	0	0	0	0	0	0
1	RNASEL	0	0	0	0	0	0	0	0	0	0	0	0	0	0	0	0	0	0	0	0	-7.4804	-7.58687	0	0	0	0	0	0	0	0	0	0	0	0	0
1	TGFB1I1	0	0	0	0	0	0	0	0	0	0	0	0	0	0	0	0	0	0	0	0	-7.89146	-7.1439	0	0	0	0	0	0	0	0	0	0	0	0	0
1	ADAMTSL3	0	0	0	0	0	0	0	0	0	0	0	0	0	0	0	0	0	0	0	0	-8.32221	-7.35335	0	0	0	0	0	0	0	0	0	0	0	0	0
1	NBL1	0	0	0	0	0	0	0	0	0	0	0	0	0	0	0	0	0	0	0	0	-7.3061	-7.68151	0	0	0	0	0	0	0	0	0	0	0	0	0
1	PTTG1IP	0	0	0	0	0	0	0	0	0	0	0	0	0	0	0	0	0	0	0	0	-7.37056	-7.83381	0	0	0	0	0	0	0	0	0	0	0	0	0
1	NT5E	0	0	0	0	0	0	0	0	0	0	0	0	0	0	0	0	0	0	0	0	-7.09792	-7.66406	0	0	0	0	0	0	0	0	0	0	0	0	0
1	GADD45B	0	0	0	0	0	0	0	0	0	0	0	0	0	0	0	0	0	0	0	0	-7.78094	-8.48205	0	0	0	0	0	0	0	0	0	0	0	0	0
1	S100A6	0	0	0	0	0	0	0	0	0	0	0	0	0	0	0	0	0	0	0	0	-7.82256	-9.15497	0	0	0	0	0	0	0	-7.04101	0	0	0	-8.21251	0
1	SUSD2	0	0	0	0	0	0	0	0	0	0	0	0	0	0	0	0	0	0	0	0	-7.46192	-7.6761	0	0	0	0	0	0	0	0	0	0	0	0	-7.08078
1	PTGER2	0	0	0	0	0	0	0	0	0	0	0	0	0	0	0	0	0	0	0	0	-9.16131	-9.45411	0	0	0	0	-7.2778	0	0	0	0	0	0	0	-7.60036
1	MGLL	0	0	0	0	0	0	0	0	0	0	0	0	0	0	0	0	0	0	0	0	0	-7.36108	0	0	0	0	0	0	0	0	0	0	0	0	-7.38844
1	LXN	0	0	0	0	0	0	0	0	0	0	0	0	0	0	0	0	0	0	-7.25487	0	-7.82304	-7.95242	0	0	0	0	0	0	0	0	0	0	0	0	0
1	GNG2	0	0	0	0	0	0	0	0	0	0	0	0	0	0	0	0	0	0	-7.82766	-8.24255	-7.20769	-7.49464	0	0	0	0	0	0	0	0	0	0	0	0	0
1	SYNE1	0	0	0	0	0	0	0	0	0	0	0	0	0	0	0	0	0	0	-8.52072	-8.9398	-9.36112	-7.40597	0	0	0	0	-7.54885	0	0	0	0	0	-8.26524	0	0
1	OLFML1	0	0	0	0	0	0	0	0	0	0	0	0	0	0	0	0	0	0	0	-7.35316	-7.23229	-7.24605	0	0	0	0	0	0	0	0	0	0	0	0	0
1	ECM2	0	0	0	0	0	0	0	0	0	0	0	0	0	0	0	0	0	0	0	-7.27252	-7.61578	-7.23716	0	0	0	0	0	0	0	0	0	0	0	0	0
1	ZEB1	0	0	0	0	0	0	0	0	0	0	0	0	0	0	0	0	0	0	0	-7.2145	-7.43312	0	0	0	0	0	0	0	0	0	0	0	0	0	0
1	CREB3L1	0	0	0	0	0	0	0	0	0	0	0	0	0	0	0	0	0	0	0	0	-7.04604	-7.20307	0	-7.80308	0	0	0	0	0	0	0	0	0	0	0
1	COL6A2	0	0	0	0	0	0	0	0	0	0	0	0	0	0	0	0	0	0	0	0	-7.81385	-7.05728	0	-7.37374	0	0	0	0	0	0	0	0	0	0	0
1	EMILIN1	0	0	0	0	0	0	0	0	0	0	0	0	0	0	0	0	0	0	0	0	-7.12168	0	0	-7.30673	0	0	0	0	0	0	0	0	0	0	0
1	RNF149	0	0	0	0	0	0	0	0	0	0	0	0	0	0	0	0	0	0	0	0	0	-7.9476	0	-7.66519	0	0	0	0	0	0	0	0	0	0	0
1	CDH11	0	0	0	0	0	0	0	0	0	0	0	0	0	0	0	0	0	0	0	-7.04919	-7.74957	-7.15042	-7.60137	0	0	0	0	0	0	0	0	0	0	0	0
1	ANTXR2	0	0	0	0	0	0	0	0	0	0	0	0	0	0	0	0	0	0	-7.45022	-8.43215	-8.2487	-8.59449	-8.43563	0	0	-7.18661	0	0	0	0	0	0	0	0	0
1	ASAM	0	0	0	0	0	0	0	0	0	0	0	0	0	0	0	0	0	0	0	0	-8.08502	-7.84815	-7.7628	-7.5999	0	0	0	0	0	0	0	0	0	0	0
1	COL6A3	0	0	0	0	0	0	0	0	0	0	0	0	0	0	0	0	0	0	0	-7.62235	-7.63249	-7.67296	-8.08436	-8.61944	0	0	0	0	0	0	0	0	0	0	0
1	BICC1	0	0	0	0	0	0	0	0	0	0	0	0	0	0	0	0	0	0	0	0	-7.97543	-7.15468	-7.35089	0	0	0	0	0	0	0	0	0	0	0	0
1	RASGRF2	0	0	0	0	0	0	0	0	0	0	0	0	0	0	0	0	0	0	0	0	-8.25267	-7.81503	-7.42375	0	0	0	0	0	0	0	0	0	0	0	0
1	TSHZ3	0	0	0	0	0	0	0	0	0	0	0	0	0	0	0	0	0	0	0	0	-7.34211	-7.31467	-7.41958	0	0	0	0	0	0	0	0	0	0	0	0
1	PDGFRA	0	0	0	0	0	0	0	0	0	0	0	0	0	0	0	0	0	0	0	0	-7.61471	-7.39056	-7.81479	0	0	0	0	0	0	0	0	0	0	0	0
1	SORCS2	0	0	0	0	0	0	0	0	0	0	0	0	0	0	0	0	0	0	0	0	-7.45467	0	-8.00843	0	0	0	0	0	0	0	0	0	0	0	0
1	SLC16A7	0	0	0	0	0	0	0	0	0	0	0	0	0	0	0	0	0	0	0	0	-7.86794	0	0	0	0	0	0	0	0	0	0	0	0	0	0
1	PER2	0	0	0	0	0	0	0	0	0	0	0	0	0	0	0	0	0	0	0	0	-7.21213	0	0	0	0	0	0	0	0	0	0	0	0	0	0
1	UNC5B	0	0	0	0	0	0	0	0	0	0	0	0	0	0	0	0	0	0	0	0	-7.93061	0	0	0	0	0	0	0	0	0	0	0	0	0	0
1	FIBIN	0	0	0	0	0	0	0	0	0	0	0	0	0	0	0	0	0	0	0	0	-7.8739	0	0	0	0	0	0	0	0	0	0	0	0	0	0
1	NALCN	0	0	0	0	0	0	0	0	0	0	0	0	0	0	0	0	0	0	0	0	-7.12666	0	0	0	0	0	0	0	0	0	0	0	0	0	0
1	AEBP1	0	0	0	0	0	0	0	0	0	0	0	0	0	0	0	0	0	0	0	0	-7.60955	0	0	0	0	0	0	0	0	0	0	0	0	0	0
1	DGKA	0	0	0	0	0	0	0	0	0	0	0	0	0	0	0	0	0	0	0	0	-7.44416	0	0	0	0	0	0	0	0	0	0	0	0	0	0
1	SELP	0	0	0	0	0	0	0	0	0	0	0	0	0	0	0	0	0	0	0	0	-7.31311	0	0	0	0	0	0	0	0	0	0	0	0	0	0
1	COL16A1	0	0	0	0	0	0	0	0	0	0	0	0	0	0	0	0	0	0	0	0	-7.27955	0	0	0	0	0	0	0	0	0	0	0	0	0	0
1	PDLIM2	0	0	0	0	0	0	0	0	0	0	0	0	0	0	0	0	0	0	0	0	-7.00049	0	0	0	0	0	0	0	0	0	0	0	0	0	0
1	KIAA0427	0	0	0	0	0	0	0	0	0	0	0	0	0	0	0	0	0	0	0	0	-7.19561	0	0	0	0	0	0	0	0	0	0	0	0	0	0
1	LYST	0	0	0	0	0	0	0	0	0	0	0	0	0	0	0	0	0	0	0	0	-7.43782	0	0	0	0	0	0	0	0	0	0	0	0	0	0
1	TNS3	0	0	0	0	0	0	0	0	0	0	0	0	0	0	0	0	0	0	0	0	-7.96013	0	0	0	0	0	0	0	0	0	0	0	0	0	0
1	MRVI1	0	0	0	0	0	0	0	0	0	0	0	0	0	0	0	0	0	0	0	0	-7.57171	0	0	0	0	0	0	0	0	0	0	0	0	0	0
1	ABCA6	0	0	0	0	0	0	0	0	0	0	0	0	0	0	0	0	0	0	0	0	-7.62616	0	0	0	0	0	0	0	0	0	0	0	0	0	0
1	C1QTNF1	0	0	0	0	0	0	0	0	0	0	0	0	0	0	0	0	0	0	0	0	-7.07457	0	0	0	0	0	0	0	0	0	0	0	0	0	0
1	ARL6IP5	0	0	0	0	0	0	0	0	0	0	0	0	0	0	0	0	0	0	0	0	0	-8.39191	0	0	0	0	0	0	0	0	0	0	0	0	0
1	S100A16	0	0	0	0	0	0	0	0	0	0	0	0	0	0	0	0	0	0	0	0	0	-9.21527	0	0	0	0	0	0	0	0	0	0	0	0	0
1	LGALS3	0	0	0	0	0	0	0	0	0	0	0	0	0	0	0	0	0	0	0	0	0	-7.95754	0	0	0	0	0	0	0	0	0	0	0	0	0
1	TMBIM1	0	0	0	0	0	0	0	0	0	0	0	0	0	0	0	0	0	0	0	0	0	-7.68614	0	0	0	0	0	0	0	0	0	0	0	0	0
1	KRT6A	0	0	0	0	0	0	0	0	0	0	0	0	0	0	0	0	0	0	0	0	0	-7.6539	0	0	0	0	0	0	0	0	0	0	0	0	0
1	DNAJC3	0	0	0	0	0	0	0	0	0	0	0	0	0	0	0	0	0	0	0	0	0	-7.50395	0	0	0	0	0	0	0	0	0	0	0	0	0
1	AHNAK2	0	0	0	0	0	0	0	0	0	0	0	0	0	0	0	0	0	0	0	0	0	-7.4141	0	0	0	0	0	0	0	0	0	0	0	0	0
1	INPP4B	0	0	0	0	0	0	0	0	0	0	0	0	0	0	0	0	0	0	0	0	0	-7.17555	0	0	0	0	0	0	0	0	0	0	0	0	0
1	BST1	0	0	0	0	0	0	0	0	0	0	0	0	0	0	0	0	0	0	0	0	0	-7.1432	0	0	0	0	0	0	0	0	0	0	0	0	0
1	PLK3	0	0	0	0	0	0	0	0	0	0	0	0	0	0	0	0	0	0	0	0	0	-7.08026	0	0	0	0	0	0	0	0	0	0	0	0	0
1	POLD4	0	0	0	0	0	0	0	0	0	0	0	0	0	0	0	0	0	0	0	0	0	-7.4573	0	0	0	0	0	0	0	0	0	0	0	0	0
1	DCN	0	0	0	0	0	0	0	0	0	0	0	0	0	0	0	0	0	0	0	0	0	-7.17627	0	0	0	0	0	0	0	0	0	0	0	0	0
1	CASP4	0	0	0	0	0	0	0	0	0	0	0	0	0	0	0	0	0	0	0	0	0	-7.27392	0	0	0	0	0	0	0	0	0	0	0	0	0
1	IL6ST	0	0	0	0	0	0	0	0	0	0	0	0	0	0	0	0	0	0	0	0	0	-7.21664	0	0	0	0	0	0	0	0	0	0	0	0	0
1	KRT6C	0	0	0	0	0	0	0	0	0	0	0	0	0	0	0	0	0	0	0	0	0	-7.65201	0	0	0	0	0	0	0	0	0	0	0	0	0
1	ANXA1	0	0	0	0	0	0	0	0	0	0	0	0	0	0	0	0	0	0	0	0	0	-7.31261	0	0	0	0	0	0	0	0	0	0	0	0	0
1	SH3GLB1	0	0	0	0	0	0	0	0	0	0	0	0	0	0	0	0	0	0	0	0	0	-7.21837	0	0	0	0	0	0	0	0	0	0	0	0	0
2	B3GNT1	0	0	0	0	0	-7.00023	0	-8.3974	-8.25996	0	0	0	0	-7.87426	-9.37923	0	0	0	0	0	0	0	0	0	0	0	0	0	0	0	0	0	0	0	0
2	FGF17	0	0	0	0	0	0	0	-7.09202	-7.89749	0	0	0	0	-10.6225	-9.86518	0	0	0	0	0	0	0	0	0	0	0	0	0	0	0	0	0	0	0	0
2	ZNF423	0	0	0	0	0	0	-7.27867	-8.37708	-9.35722	0	-7.48851	0	0	-7.81111	-11.1685	0	0	0	0	0	0	0	0	0	0	0	0	0	0	0	0	0	0	0	0
2	SLC16A12	0	0	0	0	0	0	0	0	-7.2233	0	0	0	0	-7.19986	-7.34341	0	0	0	0	0	0	0	0	0	0	0	0	0	0	0	0	0	0	0	0
2	KAZALD1	0	0	0	0	0	0	0	0	-7.64037	0	0	0	0	-8.43024	-9.51488	0	0	0	0	0	0	0	0	0	0	0	0	0	0	0	0	0	0	0	0
2	DACH1	0	0	0	0	0	-7.64405	0	-8.01515	-8.02758	-7.42291	0	0	-7.98444	-8.97005	-9.55736	0	0	0	0	0	0	0	0	0	0	0	0	0	0	0	0	0	0	0	0
2	RCOR2	0	0	0	0	0	0	0	-7.99576	-8.90362	-7.21107	0	0	-7.21485	-8.72944	-9.62204	0	0	0	0	0	0	0	0	0	0	0	0	0	0	0	0	0	0	0	0
2	FXYD1	0	0	0	0	0	0	0	-7.95533	-7.97571	0	0	0	-7.14074	-9.34223	-8.96687	0	0	0	0	0	0	0	0	0	0	0	0	0	0	0	0	0	0	0	0
2	LTBP4	0	0	0	0	0	0	0	-8.06165	-7.70843	0	0	0	-8.22001	-10.2302	-9.65592	0	0	0	0	0	0	0	0	0	0	0	0	0	0	0	0	0	0	0	0
2	FBXO17	0	0	0	0	0	0	0	-7.15849	-7.07035	0	0	0	0	-7.08966	0	0	0	0	0	0	0	0	0	0	0	0	0	0	0	0	0	0	0	0	0
2	DYX1C1	0	0	0	0	0	-7.41387	0	-7.84944	-7.47293	0	0	0	-7.22855	-7.10577	0	0	0	0	0	0	0	0	0	0	0	0	0	0	0	0	0	0	0	0	0
2	PAIP2B	0	0	0	0	0	0	0	-7.53303	0	0	0	0	0	-7.51217	0	0	0	0	0	0	0	0	0	0	0	0	0	0	0	0	0	0	0	0	0
2	EPB49	0	0	0	0	0	0	0	-7.49828	0	0	0	0	0	-7.82611	0	0	0	0	0	0	0	0	0	0	0	0	0	0	0	0	0	0	0	0	0
2	LANCL2	0	0	0	0	0	0	0	0	-7.30039	-7.61303	0	0	0	0	-7.74232	0	0	0	0	0	0	0	0	0	0	0	0	0	0	0	0	0	0	0	0
2	RND2	0	0	0	0	0	0	0	-7.26967	-8.13239	-9.443	0	0	0	0	-7.82435	0	0	0	0	0	0	0	0	0	0	0	0	0	0	0	0	0	0	0	0
2	SULT1C4	0	0	0	0	0	-8.26334	0	-8.16165	-9.8578	-7.69488	0	-7.61904	-7.03115	0	-9.01266	0	0	0	0	0	0	0	0	0	0	0	0	0	0	0	0	0	0	0	0
2	STK33	0	0	0	0	0	-8.20433	0	-8.31955	-9.62404	-8.53831	0	0	-10.085	0	-7.3341	0	0	0	0	0	0	0	0	0	0	0	0	0	0	0	0	0	0	0	0
2	FBN3	0	0	0	0	0	0	0	-7.04985	-7.83613	-8.34893	0	-7.30611	-8.28	-7.79266	-9.83975	0	0	0	0	0	0	0	0	0	0	0	0	0	0	0	0	0	0	0	0
2	MAPK8IP1	0	0	0	0	0	0	-7.27874	-9.05238	-9.42909	-8.32528	0	-7.82056	-8.31243	-9.96814	-9.71315	0	0	0	0	0	0	0	0	0	0	0	0	0	0	0	0	0	0	0	0
2	ZCCHC3	0	-7.96865	0	0	0	0	-7.36609	-8.35629	-8.21042	-7.98303	0	-9.06293	-7.60139	-8.83088	-9.58182	0	0	0	0	0	0	0	0	0	0	0	0	0	0	0	0	0	0	0	0
2	ACVR2B	0	0	0	0	0	0	-7.18292	-9.27178	-9.06571	-8.30424	0	-9.5113	0	-7.09428	-8.91578	0	0	0	0	0	0	0	0	0	0	0	0	0	0	0	0	0	0	0	0
2	ZBTB39	0	-7.83896	0	0	0	0	0	-7.7671	-7.80931	-7.36935	0	-7.90957	0	-7.83613	-8.09832	0	0	0	0	0	0	0	0	0	0	0	0	0	0	0	0	0	0	0	0
2	DHX57	0	-7.52003	0	0	0	0	-7.22692	-8.11363	-8.20778	-10.2062	-7.5023	0	-7.15414	-7.31415	-7.17819	0	0	0	0	0	0	0	0	0	0	0	0	0	0	0	0	0	0	0	0
2	KCNIP1	0	0	0	0	0	0	0	-7.70306	-8.2137	0	0	0	0	0	-7.85642	0	0	0	0	0	0	0	0	0	0	0	0	0	0	0	0	0	0	0	0
2	NARG1L	0	0	0	0	0	0	0	-8.28959	-8.98339	0	0	0	0	0	-8.4324	0	0	0	0	0	0	0	0	0	0	0	0	0	0	0	0	0	0	0	0
2	GARNL3	0	0	0	0	0	0	0	-7.19712	-7.64007	0	0	0	0	0	-7.18692	0	0	0	0	0	0	0	0	0	0	0	0	0	0	0	0	0	0	0	0
2	WBP1	0	0	0	0	0	0	0	-7.0811	-7.68733	0	0	0	0	0	-7.05279	0	0	0	0	0	0	0	0	0	0	0	0	0	0	0	0	0	0	0	0
2	UNC119B	0	0	0	0	0	0	0	-9.76978	-9.10594	0	0	0	0	0	-8.86191	0	0	0	0	0	0	0	0	0	0	0	0	0	0	0	0	0	0	0	0
2	CBFA2T2	0	0	0	0	0	0	0	-7.28492	-7.93432	0	0	0	0	0	-7.88042	0	0	0	0	0	0	0	0	0	0	0	0	0	0	0	0	0	0	0	0
2	ZNF254	0	0	0	0	0	0	0	-7.05712	-8.06503	0	0	0	0	0	-8.0279	0	0	0	0	0	0	0	0	0	0	0	0	0	0	0	0	0	0	0	0
2	PHF21B	0	0	0	0	0	0	0	-7.04676	-7.84435	0	0	0	0	0	-8.17539	0	0	0	0	0	0	0	0	0	0	0	0	0	0	0	0	0	0	0	0
2	ZNF10	0	0	0	0	0	0	0	-8.23561	-9.04498	0	0	0	0	0	-9.66956	0	0	0	0	0	0	0	0	0	0	0	0	0	0	0	0	0	0	0	0
2	COL9A3	0	0	0	0	0	0	0	-7.58112	-7.77571	0	0	0	0	0	-8.29158	0	0	0	0	0	0	0	0	0	0	0	0	0	0	0	0	0	0	0	0
2	ZNF606	0	0	0	0	0	0	0	-7.89817	-8.05689	0	0	0	0	0	-8.443	0	0	0	0	0	0	0	0	0	0	0	0	0	0	0	0	0	0	0	0
2	ZNF84	0	0	0	0	0	0	0	-7.08175	-7.25275	0	0	0	0	0	-8.49945	0	0	0	0	0	0	0	0	0	0	0	0	0	0	0	0	0	0	0	0
2	DTX3	0	0	0	0	0	0	0	0	-7.16935	0	0	0	0	0	-7.20612	0	0	0	0	0	0	0	0	0	0	0	0	0	0	0	0	0	0	0	0
2	ZNF273	0	0	0	0	0	0	0	0	-7.27398	0	0	0	0	0	-7.08269	0	0	0	0	0	0	0	0	0	0	0	0	0	0	0	0	0	0	0	0
2	PNMT	0	0	0	0	0	0	0	0	-7.65598	0	0	0	0	0	-7.09327	0	0	0	0	0	0	0	0	0	0	0	0	0	0	0	0	0	0	0	0
2	SP4	0	0	0	0	0	0	0	0	-7.21987	0	0	0	0	0	-7.61571	0	0	0	0	0	0	0	0	0	0	0	0	0	0	0	0	0	0	0	0
2	FGFRL1	0	0	0	0	0	0	0	0	-7.34474	0	0	0	0	0	-7.98192	0	0	0	0	0	0	0	0	0	0	0	0	0	0	0	0	0	0	0	0
2	CDON	0	0	0	0	0	0	0	0	-7.11626	0	0	0	0	0	-7.93545	0	0	0	0	0	0	0	0	0	0	0	0	0	0	0	0	0	0	0	0
2	ZNF678	0	0	0	0	0	0	0	0	-7.18054	0	0	0	0	0	-8.01715	0	0	0	0	0	0	0	0	0	0	0	0	0	0	0	0	0	0	0	0
2	ZFP2	0	0	0	0	0	-7.92603	0	-7.30853	-7.06045	0	0	-7.32249	0	0	-7.3952	0	0	0	0	0	0	0	0	0	0	0	0	0	0	0	0	0	0	0	0
2	USP21	0	0	0	0	0	-7.50493	0	-8.06021	-8.03107	0	0	-10.2238	0	0	-9.26012	0	0	0	0	0	0	0	0	0	0	0	0	0	0	0	0	0	0	0	0
2	ZSCAN18	0	0	0	0	0	-7.1336	0	-8.34232	-9.27035	0	0	-7.83089	0	0	-8.8537	0	0	0	0	0	0	0	0	0	0	0	0	0	0	0	0	0	0	0	0
2	IFT81	0	0	0	0	0	-7.49079	0	-8.87093	-9.73058	0	0	-7.94459	0	0	-8.48662	0	0	0	0	0	0	0	0	0	0	0	0	0	0	0	0	0	0	0	0
2	ZNF133	0	0	0	0	0	0	0	-7.64431	-7.11349	0	0	-7.4733	0	0	-7.39177	0	0	0	0	0	0	0	0	0	0	0	0	0	0	0	0	0	0	0	0
2	PCMTD2	0	0	0	0	0	0	0	-7.2863	-8.16945	0	0	-7.9631	0	0	-7.29611	0	0	0	0	0	0	0	0	0	0	0	0	0	0	0	0	0	0	0	0
2	MYST4	0	0	0	0	0	0	0	-7.2325	-7.54854	0	0	-7.46851	0	0	-8.17389	0	0	0	0	0	0	0	0	0	0	0	0	0	0	0	0	0	0	0	0
2	EDN3	0	0	0	0	0	0	0	-7.51299	-8.22977	0	0	-7.09928	0	0	-8.42313	0	0	0	0	0	0	0	0	0	0	0	0	0	0	0	0	0	0	0	0
2	TRIM45	0	0	0	0	0	0	0	-7.78733	-8.68992	0	0	-10.1327	0	0	-9.7784	0	0	0	0	0	0	0	0	0	0	0	0	0	0	0	0	0	0	0	0
2	ZNF219	0	0	0	0	0	-7.57618	0	-7.65693	-7.84877	0	0	-7.28871	-7.30886	-8.10219	-9.63777	0	0	0	0	0	0	0	0	0	0	0	0	0	0	0	0	0	0	0	0
2	PTCH1	0	0	0	0	0	-7.92593	0	-9.67362	-10.2454	0	0	-11.3996	-7.45575	-9.34845	-11.9924	0	0	0	0	0	0	0	0	0	0	0	0	0	0	0	0	0	0	0	0
2	CCNB1IP1	0	0	0	0	0	-8.68936	0	-8.42542	-8.45655	0	0	-7.5885	0	-7.36142	-8.77624	0	0	0	0	0	0	0	0	0	0	0	0	0	0	0	0	0	0	0	0
2	CHST10	0	0	0	0	0	-7.10916	0	-7.14788	-7.6418	0	0	-7.53535	0	-8.67883	-9.10636	0	0	0	0	0	0	0	0	0	0	0	0	0	0	0	0	0	0	0	0
2	CA14	0	0	0	0	0	0	0	-7.24322	-8.00658	0	0	-7.93982	0	-7.9501	-9.35633	0	0	0	0	0	0	0	0	0	0	0	0	0	0	0	0	0	0	0	0
2	B4GALNT4	0	0	0	0	0	0	0	-7.64346	-8.21723	0	0	-9.50704	0	-7.14434	-8.28586	0	0	0	0	0	0	0	0	0	0	0	0	0	0	0	0	0	0	0	0
2	LOC253724	0	0	0	0	0	0	0	0	-7.33656	0	0	-7.3046	0	0	0	0	0	0	0	0	0	0	0	0	0	0	0	0	0	0	0	0	0	0	0
2	TTLL9	0	0	0	0	0	0	0	0	-7.43	0	0	-7.0411	0	0	0	0	0	0	0	0	0	0	0	0	0	0	0	0	0	0	0	0	0	0	0
2	ZNF3	0	0	0	0	0	0	0	0	-7.3735	0	0	-8.33779	0	0	0	0	0	0	0	0	0	0	0	0	0	0	0	0	0	0	0	0	0	0	0
2	IL17RB	0	0	0	0	0	0	0	0	-7.41467	0	-7.62624	-7.18204	0	0	0	0	0	0	0	0	0	0	0	0	0	0	0	0	0	0	0	0	0	0	0
2	RFX3	0	0	0	0	0	0	0	-7.01966	-7.23444	0	0	-7.76321	0	0	0	0	0	0	0	0	0	0	0	0	0	0	0	0	0	0	0	0	0	0	0
2	GPLD1	0	0	0	0	0	0	0	-7.73557	-7.89387	0	0	-7.91604	0	0	0	0	0	0	0	0	0	0	0	0	0	0	0	0	0	0	0	0	0	0	0
2	KIF27	0	0	0	0	0	0	0	-8.11346	-8.18895	0	0	-7.56451	0	0	0	0	0	0	0	0	0	0	0	0	0	0	0	0	0	0	0	0	0	0	0
2	ALLC	0	0	0	0	0	-7.28386	-7.41531	-7.93668	-9.17291	0	0	-7.80107	0	0	0	0	0	0	0	0	0	0	0	0	0	0	0	0	0	0	0	0	0	0	0
2	COLEC11	0	0	0	0	0	-8.60155	-8.78115	-9.59954	-10.6031	0	0	-7.82222	0	0	-7.69476	0	0	0	0	0	0	0	0	0	0	0	0	0	0	0	0	0	0	0	0
2	ADNP	0	-7.17828	0	0	0	-7.62235	-7.34256	-7.59461	-8.0833	0	0	-7.15108	0	0	-7.51906	0	0	0	0	0	0	0	0	0	0	0	0	0	0	0	0	0	0	0	0
2	PTPN5	0	0	0	0	0	-7.11933	-7.07791	-7.39153	-8.72287	0	0	0	0	0	-7.48994	0	0	0	0	0	0	0	0	0	0	0	0	0	0	0	0	0	0	0	0
2	PACRG	0	0	0	0	0	-9.50743	0	-9.83033	-9.37912	0	0	0	0	0	-7.3921	0	0	0	0	0	0	0	0	0	0	0	0	0	0	0	0	0	0	0	0
2	PEG3	0	0	0	0	0	-7.88145	-7.56221	-7.51665	-8.14868	0	0	0	0	0	0	0	0	0	0	0	0	0	0	0	0	0	0	0	0	0	0	0	0	0	0
2	TEKT3	0	0	0	0	0	-8.23134	-7.47125	-7.54053	-8.1955	0	0	0	0	0	0	0	0	0	0	0	0	0	0	0	0	0	0	0	0	0	0	0	0	0	0
2	STAR	0	0	0	0	0	-8.02959	-7.99085	-8.49561	-9.11575	0	0	0	0	0	0	0	0	0	0	0	0	0	0	0	0	0	0	0	0	0	0	0	0	0	0
2	DLK1	0	0	0	0	0	-7.54092	-8.95951	-9.34287	-9.99348	0	0	0	0	0	0	0	0	0	0	0	0	0	0	0	0	0	0	0	0	0	0	0	0	0	0
2	ZKSCAN2	0	0	0	0	0	-7.78427	0	-7.32439	-7.19914	0	0	0	0	0	0	0	0	0	0	0	0	0	0	0	0	0	0	0	0	0	0	0	0	0	0
2	TEX9	0	0	0	0	0	-8.82891	0	-8.26275	-8.31883	0	0	0	0	0	0	0	0	0	0	0	0	0	0	0	0	0	0	0	0	0	0	0	0	0	0
2	TRDMT1	0	0	0	0	0	-7.96866	0	-7.19847	-7.31289	0	0	0	0	0	0	0	0	0	0	0	0	0	0	0	0	0	0	0	0	0	0	0	0	0	0
2	LRRIQ1	0	0	0	0	0	-7.83694	0	-7.32659	-7.56082	0	0	0	0	0	0	0	0	0	0	0	0	0	0	0	0	0	0	0	0	0	0	0	0	0	0
2	TCERG1L	0	0	0	0	0	-7.25217	0	-7.39075	-8.67223	0	0	0	0	0	0	0	0	0	0	0	0	0	0	0	0	0	0	0	0	0	0	0	0	0	0
2	ZNF334	0	0	0	0	0	-7.32986	0	0	-7.15473	0	0	-7.00347	0	0	0	0	0	0	0	0	0	0	0	0	0	0	0	0	0	0	0	0	0	0	0
2	TEKT2	0	0	0	0	0	-7.36936	0	-7.17141	-7.20501	0	0	-7.22388	0	0	0	0	0	0	0	0	0	0	0	0	0	0	0	0	0	0	0	0	0	0	0
2	ATRNL1	0	0	0	0	0	-7.19473	0	0	-8.10395	0	0	0	0	0	0	0	0	0	0	0	0	0	0	0	0	0	0	0	0	0	0	0	0	0	0
2	HNRNPA1	0	0	0	0	0	-9.4759	0	0	0	0	0	-7.37966	0	0	0	0	0	0	0	0	0	0	0	0	0	0	0	0	0	0	0	0	0	0	0
2	ZCCHC11	0	0	0	0	0	-8.16679	0	0	-7.11791	0	0	-7.78349	0	0	-8.68449	0	0	0	0	0	0	0	0	0	0	0	0	0	0	0	0	0	0	0	0
2	ZNF605	0	0	0	0	0	-7.08681	0	0	-7.91922	0	0	-7.51096	0	0	-9.48283	0	0	0	0	0	0	0	0	0	0	0	0	0	0	0	0	0	0	0	0
2	WNT2B	0	0	0	0	0	-7.47095	0	0	-7.38334	0	0	0	0	0	-7.14994	0	0	0	0	0	0	0	0	0	0	0	0	0	0	0	0	0	0	0	0
2	WFDC1	0	0	0	0	0	0	-8.77772	-7.82483	-7.85455	0	0	0	0	0	0	0	0	0	0	0	0	0	0	0	0	0	0	0	0	0	0	0	0	0	0
2	FOXN4	0	0	0	0	0	0	-8.90118	-8.30073	-8.49147	0	0	0	0	0	0	0	0	0	0	0	0	0	0	0	0	0	0	0	0	0	0	0	0	0	0
2	BAMBI	0	0	0	0	0	0	-7.51663	-7.39713	-8.04246	0	0	0	0	0	0	0	0	0	0	0	0	0	0	0	0	0	0	0	0	0	0	0	0	0	0
2	DYNC2LI1	0	0	0	0	0	0	-7.25454	-8.68974	-8.52647	0	0	0	0	0	0	0	0	0	0	0	0	0	0	0	0	0	0	0	0	0	0	0	0	0	0
2	WFIKKN2	0	0	0	0	0	0	-7.07031	0	-8.10651	0	0	0	0	0	0	0	0	0	0	0	0	0	0	0	0	0	0	0	0	0	0	0	0	0	0
2	SPRR2F	0	0	0	0	0	0	-7.01479	0	-7.25634	0	0	0	0	0	0	0	0	0	0	0	0	0	0	0	0	0	0	0	0	0	0	0	0	0	0
2	LAMA2	0	0	0	0	0	0	-7.28351	0	0	0	0	0	0	0	0	0	0	0	0	0	0	0	0	0	0	0	0	0	0	0	0	0	0	0	0
2	PLEKHG1	0	0	0	0	0	0	-7.53343	0	0	0	0	0	0	0	0	0	0	0	0	0	0	0	0	0	0	0	0	0	0	0	0	0	0	0	0
2	ALPL	0	-7.14337	0	0	0	0	-7.13557	0	0	0	0	0	0	0	0	0	0	0	0	0	0	0	0	0	0	0	0	0	0	0	0	0	0	0	0
2	ANUBL1	0	0	0	0	0	0	0	0	-7.15311	0	0	0	0	0	0	0	0	0	0	0	0	0	0	0	0	0	0	0	0	0	0	0	0	0	0
2	LRGUK	0	0	0	0	0	0	0	0	-7.2053	0	0	0	0	0	0	0	0	0	0	0	0	0	0	0	0	0	0	0	0	0	0	0	0	0	0
2	ARNT2	0	0	0	0	0	0	0	0	-7.03668	0	0	0	0	0	0	0	0	0	0	0	0	0	0	0	0	0	0	0	0	0	0	0	0	0	0
2	FOXL2	0	0	0	0	0	0	0	0	-8.04876	0	0	0	0	0	0	0	0	0	0	0	0	0	0	0	0	0	0	0	0	0	0	0	0	0	0
2	GATA4	0	0	0	0	0	0	0	0	-7.24517	0	0	0	0	0	0	0	0	0	0	0	0	0	0	0	0	0	0	0	0	0	0	0	0	0	0
2	LGR5	0	0	0	0	0	0	0	0	-7.65205	0	0	0	0	0	0	0	0	0	0	0	0	0	0	0	0	0	0	0	0	0	0	0	0	0	0
2	CCDC48	0	0	0	0	0	0	0	0	-7.52365	0	0	0	0	0	0	0	0	0	0	0	0	0	0	0	0	0	0	0	0	0	0	0	0	0	0
2	CCDC8	0	0	0	0	0	0	0	0	-7.48443	0	0	0	0	0	0	0	0	0	0	0	0	0	0	0	0	0	0	0	0	0	0	0	0	0	0
2	2011-09-05	0	0	0	0	0	0	0	0	-7.39577	0	0	0	0	0	0	0	0	0	0	0	0	0	0	0	0	0	0	0	0	0	0	0	0	0	0
2	NOVA1	0	0	0	0	0	0	0	0	-7.39495	0	0	0	0	0	0	0	0	0	0	0	0	0	0	0	0	0	0	0	0	0	0	0	0	0	0
2	SPINK5	0	0	0	0	0	0	0	0	-7.34313	0	0	0	0	0	0	0	0	0	0	0	0	0	0	0	0	0	0	0	0	0	0	0	0	0	0
2	DPY19L2P1	0	0	0	0	0	0	0	0	-7.3061	0	0	0	0	0	0	0	0	0	0	0	0	0	0	0	0	0	0	0	0	0	0	0	0	0	0
2	NPHP1	0	0	0	0	0	0	0	0	-7.27417	0	0	0	0	0	0	0	0	0	0	0	0	0	0	0	0	0	0	0	0	0	0	0	0	0	0
2	PLEKHH1	0	0	0	0	0	0	0	0	-7.25565	0	0	0	0	0	0	0	0	0	0	0	0	0	0	0	0	0	0	0	0	0	0	0	0	0	0
2	TSPAN8	0	0	0	0	0	0	0	0	-7.12317	0	0	0	0	0	0	0	0	0	0	0	0	0	0	0	0	0	0	0	0	0	0	0	0	0	0
2	KIF3A	0	0	0	0	0	0	0	0	-7.20621	0	0	0	0	0	0	0	0	0	0	0	0	0	0	0	0	0	0	0	0	0	0	0	0	0	0
2	CCDC40	0	0	0	0	0	0	0	0	-7.08772	0	0	0	0	0	0	0	0	0	0	0	0	0	0	0	0	0	0	0	0	0	0	0	0	0	0
2	RAB11FIP2	0	0	0	0	0	0	0	0	-7.02136	0	0	0	0	0	0	0	0	0	0	0	0	0	0	0	0	0	0	0	0	0	0	0	0	0	0
2	ZNF445	0	0	0	0	0	0	0	0	-7.1036	0	0	0	0	0	0	0	0	0	0	0	0	0	0	0	0	0	0	0	0	0	0	0	0	0	0
2	TMEM178	0	0	-8.42067	0	0	0	-7.21099	-7.51485	-7.93856	0	0	0	0	0	0	0	0	0	0	0	0	0	0	0	0	0	0	0	0	0	0	0	0	0	0
2	ENAH	0	-8.94276	-7.28855	0	0	0	-7.46648	-7.42085	-8.34932	0	0	0	-9.02539	0	0	0	0	0	0	0	0	0	0	0	0	0	0	0	0	0	0	0	0	0	0
2	SH3BGRL2	0	0	-7.17606	0	0	0	0	-7.23	0	0	0	0	0	0	0	0	0	0	0	0	0	0	0	0	0	0	0	0	0	0	0	0	0	0	0
2	ZNF167	0	-7.1205	-7.16763	0	0	0	0	-7.44416	-7.50164	0	0	0	0	0	0	0	0	0	0	0	0	0	0	0	0	0	0	0	0	0	0	0	0	0	0
2	ZNF660	0	-7.71988	-7.0084	0	0	0	0	-7.17584	-8.7392	0	0	0	0	0	0	0	0	0	0	0	0	0	0	0	0	0	0	0	0	0	0	0	0	0	0
2	VANGL2	0	-7.4035	0	0	0	0	0	-7.48936	-7.61055	0	0	0	0	0	0	0	0	0	0	0	0	0	0	0	0	0	0	0	0	0	0	0	0	0	0
2	STXBP4	0	-7.41675	0	0	0	0	0	-7.69671	-8.40071	0	0	0	0	0	0	0	0	0	0	0	0	0	0	0	0	0	0	0	0	0	0	0	0	0	0
2	COL2A1	0	-7.15571	-7.09909	0	0	0	-9.00014	-8.69257	-9.47886	0	0	0	0	0	-8.3217	0	0	0	0	0	0	0	0	0	0	0	0	0	0	0	0	0	0	0	0
2	ASXL3	0	-10.0891	0	0	0	0	-7.52536	-7.97262	-8.88968	0	0	0	0	0	-8.15691	0	0	0	0	0	0	0	0	0	0	0	0	0	0	0	0	0	0	0	0
2	HNRNPA0	0	-8.28055	-8.18698	0	0	-7.66481	-7.03791	-8.08257	-8.27473	0	0	0	0	0	-7.03995	0	0	0	0	0	0	0	0	0	0	0	0	0	0	0	0	0	0	0	0
2	CACNA2D2	0	-8.0559	0	0	0	0	0	-7.97266	-8.21322	0	0	0	0	0	-8.30321	0	0	0	0	0	0	0	0	0	0	0	0	0	0	0	0	0	0	0	0
2	FXYD6	0	-9.16522	0	0	0	-7.95679	0	-8.09167	-9.70379	0	0	0	0	0	-7.71489	0	0	0	0	0	0	0	0	0	0	0	0	0	0	0	0	0	0	0	0
2	LAMA1	-7.17407	-10.144	-8.42471	-7.38947	0	-8.0204	-8.08836	-7.53555	-8.11102	0	0	0	-7.80861	0	-7.23275	0	0	0	0	0	0	0	0	0	0	0	0	0	0	0	0	0	0	0	0
2	TCF7L1	-7.57671	-11.0353	-9.81107	0	0	-7.51754	-7.72898	-8.49774	-9.44489	0	0	0	-8.75366	0	-9.75535	0	0	0	0	0	0	0	0	0	0	0	0	0	0	0	0	0	0	0	0
2	EXTL2	0	-8.70045	-9.11932	0	0	-8.30908	0	-7.30369	-8.07522	0	-7.73454	0	0	0	0	0	0	0	0	0	0	0	0	0	0	0	0	0	0	0	0	0	0	0	0
2	ZNF738	-7.10413	-7.75204	-8.16132	0	0	-7.10228	0	0	-8.31715	0	-7.03608	-7.33934	0	0	-9.91901	0	0	0	0	0	0	0	0	0	0	0	0	0	0	0	0	0	0	0	0
2	TUBB2B	-7.22446	-8.69368	-8.46689	0	0	-7.85713	-7.3705	-7.87958	-8.85967	-8.46808	-7.92088	0	0	0	-9.8228	0	0	0	0	0	0	0	0	0	0	0	0	0	0	0	0	0	0	0	0
2	KIAA1549	-7.66368	-10.7232	-9.71624	0	0	-7.9297	-9.03071	-11.1354	-12.2835	-7.90702	-7.73568	0	-8.97628	0	-9.61897	0	0	0	0	0	0	0	0	0	0	0	0	0	0	0	0	0	0	0	0
2	FREM2	-9.12941	-9.08068	-8.35641	0	0	-7.02894	0	-7.08552	-7.45456	-7.31374	-7.4689	0	0	0	-7.15465	0	0	0	0	0	0	0	0	0	0	0	0	0	0	0	0	0	0	0	0
2	SALL2	-8.62112	-11.894	-9.04238	0	0	-7.52383	0	-7.95431	-9.02681	-8.6089	-9.34709	0	0	0	-9.55753	0	0	0	0	0	0	0	0	0	0	0	0	0	0	0	0	0	0	0	0
2	MEX3A	-8.00825	-10.953	-9.07969	0	0	-7.20526	0	0	-7.76089	-8.63541	-8.29641	0	-9.04527	0	-7.41183	0	0	0	0	0	0	0	0	0	0	0	0	0	0	0	0	0	0	0	0
2	TMEFF1	-8.25273	-11.1857	-9.68922	0	0	0	0	-7.38257	-8.41311	-9.59088	-8.72396	0	-8.41213	0	-8.92173	0	0	0	0	0	0	0	0	0	0	0	0	0	0	0	0	0	0	0	0
2	LRP4	0	-9.46652	-10.288	0	0	-7.07481	0	-7.59636	-8.93102	-8.40802	-7.66043	0	-8.29915	0	-8.5192	0	0	0	0	0	0	0	0	0	0	0	0	0	0	0	0	0	0	0	0
2	SBK1	-7.54433	-9.20106	-7.21253	0	0	0	0	-7.02193	-7.71014	-8.30907	0	0	0	0	-7.82986	0	0	0	0	0	0	0	0	0	0	0	0	0	0	0	0	0	0	0	0
2	DDX25	-7.34469	-9.18969	-9.13183	0	0	0	0	-7.58992	-9.11623	-10.1718	-8.78792	0	0	-7.15667	-9.94411	0	0	0	0	0	0	0	0	0	0	0	0	0	0	0	0	0	0	0	0
2	JARID2	-9.21647	-10.7945	-7.38589	0	0	0	0	0	-7.17044	-9.38574	0	0	-7.91168	-7.73768	-8.6223	0	0	0	0	0	0	0	0	0	0	0	0	0	0	0	0	0	0	0	0
2	SMO	0	-8.17022	-8.94128	0	0	-7.30791	-7.11266	-8.79191	-9.60529	-7.64785	-7.6761	0	0	-7.1392	-9.06827	0	0	0	0	0	0	0	0	0	0	0	0	0	0	0	0	0	0	0	0
2	CYTL1	0	-7.87619	-8.62636	0	0	-7.23423	0	-7.17141	-8.07927	-7.90512	0	0	0	-7.16987	-9.62931	0	0	0	0	0	0	0	0	0	0	0	0	0	0	0	0	0	0	0	0
2	TRIM43	0	-7.14371	0	0	0	0	0	0	-7.13793	0	0	0	0	0	0	0	0	0	0	0	0	0	0	0	0	0	0	0	0	0	0	0	0	0	0
2	ZNF286A	0	-7.21945	0	0	0	0	0	0	-8.6839	0	-7.35062	0	0	0	0	0	0	0	0	0	0	0	0	0	0	0	0	0	0	0	0	0	0	0	0
2	MYL6B	0	-7.00818	0	0	0	0	0	0	-7.38273	-7.52079	0	0	0	0	-7.39114	0	0	0	0	0	0	0	0	0	0	0	0	0	0	0	0	0	0	0	0
2	THBS4	0	-8.1958	0	0	0	0	0	0	-7.19662	0	0	0	0	0	-8.02365	0	0	0	0	0	0	0	0	0	0	0	0	0	0	0	0	0	0	0	0
2	KIF1A	0	-7.11934	0	0	0	0	0	0	0	0	0	0	0	0	-7.11301	0	0	0	0	0	0	0	0	0	0	0	0	0	0	0	0	0	0	0	0
2	ZNF428	0	-7.27982	0	0	0	0	0	0	0	0	0	0	0	0	-7.34279	0	0	0	0	0	0	0	0	0	0	0	0	0	0	0	0	0	0	0	0
2	ZNF781	0	-7.83919	0	0	0	0	0	0	0	0	0	0	0	0	-7.57388	0	0	0	0	0	0	0	0	0	0	0	0	0	0	0	0	0	0	0	0
2	SEMA6C	0	-8.30541	0	0	0	0	0	0	0	0	0	0	0	0	-7.49546	0	0	0	0	0	0	0	0	0	0	0	0	0	0	0	0	0	0	0	0
2	PAM	0	0	0	0	0	0	0	-7.27198	-7.12325	0	0	0	-7.31736	0	0	0	0	0	0	0	0	0	0	0	0	0	0	0	0	0	0	0	0	0	0
2	LRP6	0	0	0	0	0	0	0	-7.33798	-7.62298	0	0	0	-7.62815	0	0	0	0	0	0	0	0	0	0	0	0	0	0	0	0	0	0	0	0	0	0
2	GJB7	0	0	0	0	0	0	0	-7.45974	-7.13569	0	0	0	-8.45488	0	0	0	0	0	0	0	0	0	0	0	0	0	0	0	0	0	0	0	0	0	0
2	CHD7	0	0	0	0	0	0	0	-7.04422	0	0	0	0	-7.39146	0	0	0	0	0	0	0	0	0	0	0	0	0	0	0	0	0	0	0	0	0	0
2	GPM6A	0	0	0	0	0	0	0	-7.63554	-8.27521	0	0	0	0	0	0	0	0	0	0	0	0	0	0	0	0	0	0	0	0	0	0	0	0	0	0
2	GLI1	0	0	0	0	0	0	0	-7.34952	-8.3924	0	0	0	0	0	0	0	0	0	0	0	0	0	0	0	0	0	0	0	0	0	0	0	0	0	0
2	HYDIN	0	0	0	0	0	0	0	-7.52433	-7.81548	0	0	0	0	0	0	0	0	0	0	0	0	0	0	0	0	0	0	0	0	0	0	0	0	0	0
2	KIAA0753	0	0	0	0	0	0	0	-7.53349	-7.81984	0	0	0	0	0	0	0	0	0	0	0	0	0	0	0	0	0	0	0	0	0	0	0	0	0	0
2	CCDC37	0	0	0	0	0	0	0	-7.07878	-7.38162	0	0	0	0	0	0	0	0	0	0	0	0	0	0	0	0	0	0	0	0	0	0	0	0	0	0
2	RBM12	0	0	0	0	0	0	0	-8.16033	-8.51012	0	0	0	0	0	0	0	0	0	0	0	0	0	0	0	0	0	0	0	0	0	0	0	0	0	0
2	DYNC2H1	0	0	0	0	0	0	0	-7.95727	-8.14494	0	0	0	0	0	0	0	0	0	0	0	0	0	0	0	0	0	0	0	0	0	0	0	0	0	0
2	PREPL	0	0	0	0	0	0	0	-7.49236	-7.35311	0	0	0	0	0	0	0	0	0	0	0	0	0	0	0	0	0	0	0	0	0	0	0	0	0	0
2	RTDR1	0	0	0	0	0	0	0	-7.75212	-7.59081	0	0	0	0	0	0	0	0	0	0	0	0	0	0	0	0	0	0	0	0	0	0	0	0	0	0
2	ARMC4	0	0	0	0	0	0	0	-7.40888	-7.42192	0	0	0	0	0	0	0	0	0	0	0	0	0	0	0	0	0	0	0	0	0	0	0	0	0	0
2	CAPSL	0	0	0	0	0	0	0	-7.31005	-7.05717	0	0	0	0	0	0	0	0	0	0	0	0	0	0	0	0	0	0	0	0	0	0	0	0	0	0
2	NEK5	0	0	0	0	0	0	0	-7.94133	-7.66435	0	0	0	0	0	0	0	0	0	0	0	0	0	0	0	0	0	0	0	0	0	0	0	0	0	0
2	DNAH7	0	0	0	0	0	0	0	-8.00635	-7.72229	0	0	0	0	0	0	0	0	0	0	0	0	0	0	0	0	0	0	0	0	0	0	0	0	0	0
2	RSPH10B	0	0	0	0	0	0	0	-7.83919	-7.60966	0	0	0	0	0	0	0	0	0	0	0	0	0	0	0	0	0	0	0	0	0	0	0	0	0	0
2	FGF9	0	0	0	0	0	0	0	-7.43794	-7.11911	0	0	0	0	0	0	0	0	0	0	0	0	0	0	0	0	0	0	0	0	0	0	0	0	0	0
2	SSX2IP	0	0	0	0	0	0	0	-8.42017	-8.04009	0	0	0	0	0	0	0	0	0	0	0	0	0	0	0	0	0	0	0	0	0	0	0	0	0	0
2	ZNF322A	0	0	0	0	0	0	0	-7.35811	-7.06037	0	0	0	0	0	0	0	0	0	0	0	0	0	0	0	0	0	0	0	0	0	0	0	0	0	0
2	SOX6	0	0	0	0	0	0	0	-8.325	-7.41365	0	0	0	0	0	0	0	0	0	0	0	0	0	0	0	0	0	0	0	0	0	0	0	0	0	0
2	BCL7A	0	0	0	0	0	0	0	-7.56759	0	0	0	0	0	0	0	0	0	0	0	0	0	0	0	0	0	0	0	0	0	0	0	0	0	0	0
2	FANCF	0	0	0	0	0	0	0	-7.83247	0	0	0	0	0	0	0	0	0	0	0	0	0	0	0	0	0	0	0	0	0	0	0	0	0	0	0
2	LRRC48	0	0	0	0	0	0	0	-7.26872	0	0	0	0	0	0	0	0	0	0	0	0	0	0	0	0	0	0	0	0	0	0	0	0	0	0	0
2	WDR63	0	0	0	0	0	0	0	-7.26824	0	0	0	0	0	0	0	0	0	0	0	0	0	0	0	0	0	0	0	0	0	0	0	0	0	0	0
2	PFKM	0	0	0	0	0	0	0	-7.26149	0	0	0	0	0	0	0	0	0	0	0	0	0	0	0	0	0	0	0	0	0	0	0	0	0	0	0
2	AGR3	0	0	0	0	0	0	0	-7.10931	0	0	0	0	0	0	0	0	0	0	0	0	0	0	0	0	0	0	0	0	0	0	0	0	0	0	0
2	PPP2R1A	0	0	0	0	0	0	0	-7.08335	0	0	0	0	0	0	0	0	0	0	0	0	0	0	0	0	0	0	0	0	0	0	0	0	0	0	0
2	TPPP3	0	0	0	0	0	0	0	-7.06309	0	0	0	0	0	0	0	0	0	0	0	0	0	0	0	0	0	0	0	0	0	0	0	0	0	0	0
2	EFCAB1	0	0	0	0	0	0	0	-7.05535	0	0	0	0	0	0	0	0	0	0	0	0	0	0	0	0	0	0	0	0	0	0	0	0	0	0	0
2	IFT88	0	0	0	0	0	0	0	-7.23539	0	0	0	0	0	0	0	0	0	0	0	0	0	0	0	0	0	0	0	0	0	0	0	0	0	0	0
2	RGMB	0	0	0	0	0	0	0	-7.18905	0	0	0	0	0	0	0	0	0	0	0	0	0	0	0	0	0	0	0	0	0	0	0	0	0	0	0
2	IQUB	0	0	0	0	0	0	0	-7.19255	0	0	0	0	0	0	0	0	0	0	0	0	0	0	0	0	0	0	0	0	0	0	0	0	0	0	0
2	SPATA17	0	0	0	0	0	0	0	-7.45372	0	0	0	0	0	0	0	0	0	0	0	0	0	0	0	0	0	0	0	0	0	0	0	0	0	0	0
3	ITGBL1	0	0	0	0	0	0	0	0	0	0	0	0	0	0	0	-9.76115	-8.68099	-9.03888	0	0	0	0	0	0	0	0	0	-7.38487	0	0	0	0	0	0	0
3	GREM1	0	0	0	0	0	0	0	0	0	0	0	0	0	0	0	-11.072	-9.73488	-10.2836	0	0	0	0	0	0	0	0	0	-7.15191	0	0	0	0	0	0	0
3	LRRC15	0	0	0	0	0	0	0	0	0	0	0	0	0	0	0	-10.8886	-9.58145	-10.1309	0	0	0	0	0	0	0	-7.44752	0	-7.00297	0	0	0	0	0	0	0
3	PLAU	0	0	0	0	0	0	0	0	0	0	0	0	0	0	0	-11.1957	-9.74326	-10.5338	0	0	0	0	0	0	0	-7.74329	0	-7.61787	0	0	0	0	0	0	0
3	COL10A1	0	0	0	0	0	0	0	0	0	0	0	0	0	0	0	-9.98507	-8.93408	-9.38837	0	0	0	0	0	0	0	-7.24329	0	0	0	0	0	0	0	0	0
3	FN1	0	0	0	0	0	0	0	0	0	0	0	0	0	0	0	-11.482	-10.1734	-10.5212	0	0	0	0	0	0	0	-7.6324	0	0	0	0	0	0	0	0	0
3	THBS2	0	0	0	0	0	0	0	0	0	0	0	0	0	0	0	-12.011	-10.7514	-11.1812	0	0	0	-7.08664	0	0	0	-7.86626	0	0	0	0	0	0	0	0	0
3	GJB2	0	0	0	0	0	0	0	0	0	0	0	0	0	0	0	-8.42538	-7.47396	-7.95515	0	0	0	0	0	-7.60661	0	-7.19274	-7.03316	-7.67042	0	0	0	0	0	0	0
3	TMEM158	0	0	0	0	0	0	0	0	0	0	0	0	0	0	0	-9.59839	-8.51148	-8.91402	0	0	0	0	0	-7.31268	0	-7.07544	0	-8.23232	0	0	0	0	0	0	0
3	ITGA5	0	0	0	0	0	0	0	0	0	0	0	0	0	0	0	-8.68669	-7.95376	-8.47484	0	0	0	0	0	-7.10253	0	-7.42999	0	0	0	0	0	0	0	0	0
3	SERPINF1	0	0	0	0	0	0	0	0	0	0	0	0	0	0	0	-8.60515	-7.71155	-8.21767	0	0	-7.65748	-7.81056	0	0	0	0	0	0	0	0	0	0	0	0	0
3	LGALS1	0	0	0	0	0	0	0	0	0	0	0	0	0	0	0	-8.89313	-7.83181	-8.33692	0	0	-7.78631	-7.8173	0	0	0	0	0	-7.05415	0	0	0	0	0	0	0
3	ITGA11	0	0	0	0	0	0	0	0	0	0	0	0	0	0	0	-9.60112	-8.65851	-9.07416	0	0	-7.01329	-7.05894	0	0	0	-7.43109	0	-7.36745	0	0	0	0	0	0	0
3	THBS1	0	0	0	0	0	0	0	0	0	0	0	0	0	0	0	-8.18082	-7.41346	-7.76392	0	0	0	-7.04612	0	0	0	0	0	0	0	0	0	0	0	0	0
3	FGF7	0	0	0	0	0	0	0	0	0	0	0	0	0	0	0	-8.54516	-7.84035	-8.15514	0	0	0	-7.12616	0	0	0	0	0	0	0	0	0	0	0	0	0
3	COLEC12	0	0	0	0	0	0	0	0	0	0	0	0	0	0	0	-8.58783	-7.37961	-7.86472	0	0	0	0	-7.06466	-8.88176	0	0	0	-7.31452	0	0	0	0	0	0	0
3	VCAN	0	0	0	0	0	0	0	0	0	0	0	0	0	0	0	-9.8439	-8.556	-8.91849	0	0	0	0	-7.4517	-7.61126	0	0	0	0	0	0	0	0	0	0	0
3	LOX	0	0	0	0	0	0	0	0	0	0	0	0	0	0	0	-9.51641	-8.56285	-8.95058	0	0	0	0	-7.02815	0	0	0	0	0	0	0	0	0	0	0	0
3	VCAM1	0	0	0	0	0	0	0	0	0	0	0	0	0	0	0	-7.9545	-7.05261	-7.34187	-7.04108	-7.4971	0	0	-7.87974	-7.28392	0	0	0	0	0	0	0	0	0	0	0
3	COL5A2	0	0	0	0	0	0	0	0	0	0	0	0	0	0	0	-10.4189	-9.29326	-9.61315	0	0	0	0	0	-7.29859	0	0	0	0	0	0	0	0	0	0	0
3	ADAM12	0	0	0	0	0	0	0	0	0	0	0	0	0	0	0	-11.0057	-9.78951	-10.0881	0	0	0	0	0	-7.54649	0	0	0	0	0	0	0	0	0	0	0
3	PRRX1	0	0	0	0	0	0	0	0	0	0	0	0	0	0	0	-11.0626	-9.99534	-10.4779	0	0	0	0	0	-7.10099	0	0	0	0	0	0	0	0	0	0	0
3	ADAM19	0	0	0	0	0	0	0	0	0	0	0	0	0	0	0	-8.51219	-7.81956	-8.40656	0	0	0	0	0	-7.79213	0	0	0	0	0	0	0	0	0	0	0
3	LOXL2	0	0	0	-8.33013	0	0	0	0	0	0	0	0	0	0	0	-8.35554	-7.68671	-8.04586	0	0	0	0	0	-8.07628	0	0	0	0	0	0	0	0	0	0	0
3	CD248	0	0	0	-9.07784	0	0	0	0	0	0	0	0	0	0	0	-7.86504	-7.28978	-7.47296	0	0	0	0	0	-7.41865	0	0	0	0	0	0	0	0	0	0	0
3	PLXDC1	0	0	0	-7.07874	0	0	0	0	0	0	0	0	0	0	0	-9.46287	-8.53088	-8.65168	0	0	0	0	0	0	0	0	0	0	0	0	0	0	0	0	0
3	TNFSF4	0	0	0	0	0	0	0	0	0	0	0	0	0	0	0	-8.35882	-7.82256	-7.96838	0	0	0	0	0	0	0	0	0	0	0	0	0	0	0	0	0
3	MOXD1	0	0	0	0	0	0	0	0	0	0	0	0	0	0	0	-8.95001	-8.3608	-8.53714	0	0	0	0	0	0	0	0	0	0	0	0	0	0	0	0	0
3	CRISPLD2	0	0	0	0	0	0	0	0	0	0	0	0	0	0	0	-9.94577	-9.31413	-9.43827	0	0	0	0	0	0	0	0	0	0	0	0	0	0	0	0	0
3	PDGFRB	0	0	0	0	0	0	0	0	0	0	0	0	0	0	0	-7.7961	-7.24195	-7.36003	0	0	0	0	0	0	0	0	0	0	0	0	0	0	0	0	0
3	LUM	0	0	0	0	0	0	0	0	0	0	0	0	0	0	0	-11.1706	-10.3548	-10.5243	0	0	0	0	0	0	0	0	0	0	0	0	0	0	0	0	0
3	GZMK	0	0	0	0	0	0	0	0	0	0	0	0	0	0	0	-7.69836	-7.17471	-7.26365	0	0	0	0	0	0	0	0	0	0	0	0	0	0	0	0	0
3	PTGER3	0	0	0	0	0	0	0	0	0	0	0	0	0	0	0	-8.26613	-7.64169	-7.8559	0	0	0	0	0	0	0	0	0	0	0	0	0	0	0	0	0
3	FGF1	0	0	0	0	0	0	0	0	0	0	0	0	0	0	0	-9.45107	-8.76489	-8.97289	0	0	0	0	0	0	0	0	0	0	0	0	0	0	0	0	0
3	ALDH1A3	0	0	0	0	0	0	0	0	0	0	0	0	0	0	0	-7.96667	-7.31287	-7.53396	0	0	0	0	0	0	0	0	0	0	0	0	0	0	0	0	0
3	IGFL2	0	0	0	0	0	0	0	0	0	0	0	0	0	0	0	-9.28656	-8.51655	-8.79104	0	0	0	0	0	0	0	0	0	0	0	0	0	0	0	0	0
3	CCL11	0	0	0	0	0	0	0	0	0	0	0	0	0	0	0	-10.8521	-9.96417	-10.239	0	0	0	0	0	0	0	0	0	0	0	0	0	0	0	0	0
3	PLVAP	0	0	0	0	0	0	0	0	0	0	0	0	0	0	0	-10.03	-9.21913	-9.40187	0	0	0	0	0	0	0	0	0	0	0	0	0	0	0	0	0
3	TDO2	0	0	0	0	0	0	0	0	0	0	0	0	0	0	0	-10.6966	-9.84741	-9.96267	0	0	0	0	0	0	0	0	0	0	0	0	0	0	0	0	0
3	CCDC102B	0	0	0	0	0	0	0	0	0	0	0	0	0	0	0	-8.41924	-7.77914	-7.73769	0	0	0	0	0	0	0	0	0	0	0	0	0	0	0	0	0
3	HAS2	0	0	0	0	0	0	0	0	0	0	0	0	0	0	0	-7.48996	-7.06725	-7.24109	0	0	0	0	0	0	0	0	0	0	0	0	0	0	0	0	0
3	IL21R	0	0	0	0	0	0	0	0	0	0	0	0	0	0	0	-7.66404	-7.19832	-7.37129	0	0	0	0	0	0	0	0	0	0	0	0	0	0	0	0	0
3	CD36	0	0	0	0	0	0	0	0	0	0	0	0	0	0	0	-7.60303	-7.20045	-7.30745	0	0	0	0	0	0	0	0	0	0	0	0	0	0	0	0	0
3	TIMP3	0	0	0	0	0	0	0	0	0	0	0	0	0	0	0	-8.92107	-8.44412	-8.56403	0	0	0	0	0	0	0	0	0	0	0	0	0	0	0	0	0
3	DEPDC7	0	0	0	0	0	0	0	0	0	0	0	0	0	0	0	-7.48331	-7.07701	-7.18889	0	0	0	0	0	0	0	0	0	0	0	0	0	0	0	0	0
3	DCLK3	0	0	0	0	0	0	0	0	0	0	0	0	0	0	0	-7.37601	-7.03597	-7.01611	0	0	0	0	0	0	0	0	0	0	0	0	0	0	0	0	0
3	CXCL12	0	0	0	0	0	0	0	0	0	0	0	0	0	0	0	-7.98832	-7.70993	-7.82383	0	0	0	0	0	0	0	0	0	0	0	0	0	0	0	0	0
3	ACAN	0	0	0	0	0	0	0	0	0	0	0	0	0	0	0	-8.84513	-8.54708	-8.56825	0	0	0	0	0	0	0	0	0	0	0	0	0	0	0	0	0
3	CCDC80	0	0	0	0	0	0	0	0	0	0	0	0	0	0	0	-9.7885	-9.16244	-9.62622	0	0	0	0	0	0	0	0	0	0	0	0	0	0	0	0	0
3	ADAMTS2	0	0	0	0	0	0	0	0	0	0	0	0	0	0	0	-9.82726	-9.26103	-9.7049	0	0	0	0	0	0	0	0	0	0	0	0	0	0	0	0	0
3	PTGIR	0	0	0	0	0	0	0	0	0	0	0	0	0	0	0	-8.86476	-8.3971	-8.72716	0	0	0	0	0	0	0	0	0	0	0	0	0	0	0	0	0
3	SVEP1	0	0	0	0	0	0	0	0	0	0	0	0	0	0	0	-9.49702	-8.95947	-9.31361	0	0	0	0	0	0	0	0	0	0	0	0	0	0	0	0	0
3	SPOCD1	0	0	0	0	0	0	0	0	0	0	0	0	0	0	0	-7.68006	-7.0761	-7.53027	0	0	0	0	0	0	0	0	0	0	0	0	0	0	0	0	0
3	GFPT2	0	0	0	0	0	0	0	0	0	0	0	0	0	0	0	-8.2816	-7.65343	-8.16437	0	0	0	0	0	0	0	0	0	0	0	0	0	0	0	0	0
3	EDNRA	0	0	0	0	0	0	0	0	0	0	0	0	0	0	0	-9.16111	-8.46281	-8.80318	0	0	0	0	0	0	0	0	0	0	0	0	0	0	0	0	0
3	SPHK1	0	0	0	0	0	0	0	0	0	0	0	0	0	0	0	-9.8915	-9.16048	-9.50384	0	0	0	0	0	0	0	0	0	0	0	0	0	0	0	0	0
3	PDLIM3	0	0	0	0	0	0	0	0	0	0	0	0	0	0	0	-7.75087	-7.11794	-7.46296	0	0	0	0	0	0	0	0	0	0	0	0	0	0	0	0	0
3	PRKG1	0	0	0	0	0	0	0	0	0	0	0	0	0	0	0	-7.91349	-7.34103	-7.5688	0	0	0	0	0	0	0	0	0	0	0	0	0	0	0	0	0
3	CTHRC1	0	0	0	0	0	0	0	0	0	0	0	0	0	0	0	-8.04936	-7.49237	-7.70556	0	0	0	0	0	0	0	0	0	0	0	0	0	0	0	0	0
3	HLX	0	0	0	0	0	0	0	0	0	0	0	0	0	0	0	-8.65526	-8.07546	-8.32754	0	0	0	0	0	0	0	0	0	0	0	0	0	0	0	0	0
3	NUAK1	0	0	0	0	0	0	0	0	0	0	0	0	0	0	0	-7.83556	-7.26135	-7.59373	0	0	0	0	0	0	0	0	0	0	0	0	0	0	0	0	0
3	ADAMTS4	0	0	0	0	0	0	0	0	0	0	0	0	0	0	0	-8.38444	-7.81115	-8.18059	0	0	0	0	0	0	0	0	0	0	0	0	0	0	0	0	0
3	GEM	0	0	0	0	0	0	0	0	0	0	0	0	0	0	0	-7.95726	-7.45656	-7.72738	0	0	0	0	0	0	0	0	0	0	0	0	0	0	0	0	0
3	MSC	0	0	0	0	0	0	0	0	0	0	0	0	0	0	0	-8.7773	-8.43263	-8.768	0	0	0	0	0	0	0	0	0	0	0	0	0	0	0	0	0
3	ADAMTSL1	0	0	0	0	0	0	0	0	0	0	0	0	0	0	0	-9.01527	-8.70181	-9.0074	0	0	0	0	0	0	0	0	0	0	0	0	0	0	0	0	0
3	PLAC9	0	0	0	0	0	0	0	0	0	0	0	0	0	0	0	-7.46123	-7.1459	-7.35333	0	0	0	0	0	0	0	0	0	0	0	0	0	0	0	0	0
3	ANGPTL2	0	0	0	0	0	0	0	0	0	0	0	0	0	0	0	-7.30467	-7.1103	-7.28559	0	0	0	0	0	0	0	0	0	0	0	0	0	0	0	0	0
3	SERPINE1	0	0	0	0	0	0	0	0	0	0	0	0	0	0	0	-8.54444	-8.28651	-8.4544	0	0	0	0	0	0	0	0	0	0	0	0	0	0	0	0	0
3	GAS1	0	0	0	0	0	0	0	0	0	0	0	0	0	0	0	-7.10914	-7.02081	-7.39704	0	0	0	0	0	0	0	0	0	0	0	0	0	0	0	0	0
3	MMP19	0	0	0	0	0	0	0	0	0	0	0	0	0	0	0	-9.03515	-8.1622	-8.54394	0	0	0	0	0	0	0	0	0	0	0	0	0	0	0	0	0
3	INHBA	0	0	0	0	0	0	0	0	0	0	0	0	0	0	0	-12.0095	-10.7841	-11.3096	0	0	0	0	0	0	0	0	0	0	0	0	0	0	0	0	0
3	CORIN	0	0	0	0	0	0	0	0	0	0	0	0	0	0	0	-7.87286	-7.09501	-7.47738	0	0	0	0	0	0	0	0	0	0	0	0	0	0	0	0	0
3	COL8A1	0	0	0	0	0	0	0	0	0	0	0	0	0	0	0	-9.08443	-8.18825	-8.72837	0	0	0	0	0	0	0	0	0	0	0	0	0	0	0	0	0
3	OLFML2B	0	0	0	0	0	0	0	0	0	0	0	0	0	0	0	-10.9919	-9.78566	-10.2964	0	0	0	0	0	0	0	0	0	0	0	0	0	0	0	0	0
3	ECM1	0	0	0	0	0	0	0	0	0	0	0	0	0	0	0	-11.6854	-10.4162	-10.9552	0	0	0	0	0	0	0	0	0	0	0	0	0	0	0	0	0
3	SFRP2	0	0	0	0	0	0	0	0	0	0	0	0	0	0	0	-11.9706	-10.6394	-11.1798	0	0	0	0	0	0	0	0	0	0	0	0	0	0	0	0	0
3	DIO2	0	0	0	0	0	0	0	0	0	0	0	0	0	0	0	-8.56082	-7.60018	-8.04826	0	0	0	0	0	0	0	0	0	0	0	0	0	0	0	0	0
3	MEGF10	0	0	0	0	0	0	0	0	0	0	0	0	0	0	0	-8.14302	-7.12777	-7.6103	0	0	0	0	0	0	0	0	0	0	0	0	0	0	0	0	0
3	GALNT5	0	0	0	0	0	0	0	0	0	0	0	0	0	0	0	-9.23263	-8.0645	-8.62336	0	0	0	0	0	0	0	0	0	0	0	0	0	0	0	0	0
3	MMP13	0	0	0	0	0	0	0	0	0	0	0	0	0	0	0	-8.57742	-7.54496	-8.0502	0	0	0	0	0	0	0	0	0	0	0	0	0	0	0	0	0
3	SULF1	0	0	0	0	0	0	0	0	0	0	0	0	0	0	0	-10.314	-8.89521	-9.48057	0	0	0	0	0	0	0	0	0	0	0	0	0	0	0	0	0
3	COL3A1	0	0	0	0	0	0	0	0	0	0	0	0	0	0	0	-8.30118	-7.59056	-7.79864	0	0	0	0	0	0	0	0	0	0	0	0	0	0	0	0	0
3	GUCY1A3	0	0	0	0	0	0	0	0	0	0	0	0	0	0	0	-10.3782	-9.45426	-9.72095	0	0	0	0	0	0	0	0	0	0	0	0	0	0	0	0	0
3	ALPK2	0	0	0	0	0	0	0	0	0	0	0	0	0	0	0	-12.0495	-10.9807	-11.3629	0	0	0	0	0	0	0	0	0	0	0	0	0	0	0	0	0
3	IL16	0	0	0	0	0	0	0	0	0	0	0	0	0	0	0	-9.32648	-8.4389	-8.74291	0	0	0	0	0	0	0	0	0	0	0	0	0	0	0	0	0
3	EPYC	0	0	0	0	0	0	0	0	0	0	0	0	0	0	0	-10.5571	-9.56423	-9.90675	0	0	0	0	0	0	0	0	0	0	0	0	0	0	0	0	0
3	ASPN	0	0	0	0	0	0	0	0	0	0	0	0	0	0	0	-11.6185	-10.5959	-10.846	0	0	0	0	0	0	0	0	0	0	0	0	0	0	0	0	0
3	TNFAIP6	0	0	0	0	0	0	0	0	0	0	0	0	0	0	0	-12.3969	-11.2475	-11.5404	0	0	0	0	0	0	0	0	0	0	0	0	0	0	0	0	0
3	MMP11	0	0	0	0	0	0	0	0	0	0	0	0	0	0	0	-9.0518	-8.12784	-8.41982	0	0	0	0	0	0	0	0	0	0	0	0	0	0	0	0	0
3	DPT	0	0	0	0	0	0	0	0	0	0	0	0	0	0	0	-9.24246	-8.30673	-8.59442	0	0	0	0	0	0	0	0	0	0	0	0	0	0	0	0	0
3	COL11A1	0	0	0	0	0	0	0	0	0	0	0	0	0	0	0	-12.2582	-11.0707	-11.4283	0	0	0	0	0	0	0	0	0	0	0	0	0	0	0	0	0
3	COL6A6	0	0	0	0	0	0	0	0	0	0	0	0	0	0	0	-11.221	-10.0886	-10.4885	0	0	0	0	0	0	0	0	0	0	0	0	0	0	0	0	0
3	FAP	0	0	0	0	0	0	0	0	0	0	0	0	0	0	0	-13.9065	-12.49	-12.9918	0	0	0	0	0	0	0	0	0	0	0	0	0	0	0	0	0
3	COPZ2	0	0	0	0	0	0	0	0	0	0	0	0	0	0	0	-8.00078	-7.11063	-7.37977	0	0	0	0	0	0	0	0	0	0	0	0	0	0	0	0	0
3	CTSK	0	0	0	0	0	0	0	0	0	0	0	0	0	0	0	-10.552	-9.34591	-9.75265	0	0	0	0	0	0	0	0	0	0	0	0	0	0	0	0	0
3	ADAMTS12	0	0	0	0	0	0	0	0	0	0	0	0	0	0	0	-8.25123	-7.34736	-7.66465	0	0	0	0	0	0	0	0	0	0	0	0	0	0	0	0	0
3	COL5A3	0	0	0	0	0	0	0	0	0	0	0	0	0	0	0	-10.0649	-8.94848	-9.34374	0	0	0	0	0	0	0	0	0	0	0	0	0	0	0	0	0
3	POSTN	0	0	0	0	0	0	0	0	0	0	0	0	0	0	0	-15.4708	-13.7877	-14.2014	0	0	0	0	0	0	0	0	0	0	0	0	0	0	0	0	0
3	IL7R	0	0	0	0	0	0	0	0	0	0	0	0	0	0	0	-9.58068	-8.41761	-8.91471	0	0	0	0	0	0	0	0	0	0	0	0	-7.2584	0	0	0	0
3	MMP2	0	0	0	0	0	0	0	0	0	0	0	0	0	0	0	-7.73784	0	-7.02332	0	0	-7.51067	0	0	0	0	0	0	0	0	0	0	0	0	0	0
3	PODN	0	0	0	0	0	0	0	0	0	0	0	0	0	0	0	-8.03828	-7.92188	-8.17589	0	0	-7.36257	0	0	0	0	0	0	0	0	0	0	0	0	0	0
3	FBN1	0	0	0	0	0	0	0	0	0	0	0	0	0	0	0	-7.31795	0	0	0	0	-7.12985	0	0	0	0	0	0	0	0	0	0	0	0	0	0
3	AQP1	0	0	0	0	0	0	0	0	0	0	0	0	0	0	0	-7.28186	0	0	0	0	-8.02402	0	0	0	0	0	0	0	0	0	0	0	0	0	0
3	MMP9	0	0	0	0	0	0	0	0	0	0	0	0	0	0	0	-7.21203	0	-7.10225	0	0	0	0	0	0	0	0	0	0	0	0	0	0	0	0	0
3	PRKCDBP	0	0	0	0	0	0	0	0	0	0	0	0	0	0	0	-7.53168	0	-7.38128	0	0	0	0	0	0	0	0	0	0	0	0	0	0	0	0	0
3	MMP14	0	0	0	0	0	0	0	0	0	0	0	0	0	0	0	-7.3706	0	-7.3204	0	0	0	0	0	0	0	0	0	0	0	0	0	0	0	0	0
3	KIAA1949	0	0	0	0	0	0	0	0	0	0	0	0	0	0	0	-7.42705	0	-7.37124	0	0	0	0	0	0	0	0	0	0	0	0	0	0	0	0	0
3	CCL26	0	0	0	0	0	0	0	0	0	0	0	0	0	0	0	-7.2214	0	-7.15444	0	0	0	0	0	0	0	0	0	0	0	0	0	0	0	0	0
3	GPR68	0	0	0	0	0	0	0	0	0	0	0	0	0	0	0	-7.63952	0	-7.42116	0	0	0	0	0	0	0	0	0	0	0	0	0	0	0	0	0
3	KIF26B	0	0	0	0	0	0	0	0	0	0	0	0	0	0	0	-7.67655	0	-7.41089	0	0	0	0	0	0	0	0	0	0	0	0	0	0	0	0	0
3	KCNJ8	0	0	0	0	0	0	0	0	0	0	0	0	0	0	0	-7.51646	0	-7.04619	0	0	0	0	0	0	0	0	0	0	0	0	0	0	0	0	0
3	AK5	0	0	0	0	0	0	0	0	0	0	0	0	0	0	0	-7.42121	0	0	0	0	0	0	0	0	0	0	0	0	0	0	0	0	0	0	0
3	CCRL1	0	0	0	0	0	0	0	0	0	0	0	0	0	0	0	-7.7078	0	0	0	0	0	0	0	0	0	0	0	0	0	0	0	0	0	0	0
3	C1QTNF6	0	0	0	0	0	0	0	0	0	0	0	0	0	0	0	-7.40426	0	0	0	0	0	0	0	0	0	0	0	0	0	0	0	0	0	0	0
3	CST7	0	0	0	0	0	0	0	0	0	0	0	0	0	0	0	-7.39074	0	0	0	0	0	0	0	0	0	0	0	0	0	0	0	0	0	0	0
3	NCAM2	0	0	0	0	0	0	0	0	0	0	0	0	0	0	0	-7.29426	0	0	0	0	0	0	0	0	0	0	0	0	0	0	0	0	0	0	0
3	MCTP1	0	0	0	0	0	0	0	0	0	0	0	0	0	0	0	-7.21542	0	0	0	0	0	0	0	0	0	0	0	0	0	0	0	0	0	0	0
3	MICAL1	0	0	0	0	0	0	0	0	0	0	0	0	0	0	0	-7.10846	0	0	0	0	0	0	0	0	0	0	0	0	0	0	0	0	0	0	0
3	SGIP1	0	0	0	0	0	0	0	0	0	0	0	0	0	0	0	-7.07851	0	0	0	0	0	0	0	0	0	0	0	0	0	0	0	0	0	0	0
3	TWIST1	0	0	0	0	0	0	0	0	0	0	0	0	0	0	0	-7.07761	0	0	0	0	0	0	0	0	0	0	0	0	0	0	0	0	0	0	0
3	PPAPDC1A	0	0	0	0	0	0	0	0	0	0	0	0	0	0	0	-7.04535	0	0	0	0	0	0	0	0	0	0	0	0	0	0	0	0	0	0	0
3	SCG2	0	0	0	0	0	0	0	0	0	0	0	0	0	0	0	-7.00214	0	0	0	0	0	0	0	0	0	0	0	0	0	0	0	0	0	0	0
3	CDH13	0	0	0	0	0	0	0	0	0	0	0	0	0	0	0	-7.15042	0	0	0	0	0	0	0	0	0	0	0	0	0	0	0	0	0	0	0
3	NLRC3	0	0	0	0	0	0	0	0	0	0	0	0	0	0	0	-7.11019	0	0	0	0	0	0	0	0	0	0	0	0	0	0	0	0	0	0	0
3	NETO1	0	0	0	0	0	0	0	0	0	0	0	0	0	0	0	-7.03509	0	0	0	0	0	0	0	0	0	0	0	0	0	0	0	0	0	0	0
3	TPSAB1	0	0	0	0	0	0	0	0	0	0	0	0	0	0	0	-7.36885	0	0	0	0	0	0	0	0	0	0	0	0	0	0	0	0	0	0	0
3	PHLDB2	0	0	0	0	0	0	0	0	0	0	0	0	0	0	0	-7.09891	0	0	0	0	0	0	0	0	0	0	0	0	0	0	0	0	0	0	0
3	SLAMF9	0	0	0	0	0	0	0	0	0	0	0	0	0	0	0	-7.2145	0	0	0	0	0	0	0	0	0	0	0	0	0	0	0	0	0	0	0
3	TNFRSF9	0	0	0	0	0	0	0	0	0	0	0	0	0	0	0	-7.07962	0	0	0	0	0	0	0	0	0	0	0	0	0	0	0	0	0	0	0
3	CXCL14	0	0	0	0	0	0	0	0	0	0	0	0	0	0	0	-7.05493	0	0	0	0	0	0	0	0	0	0	0	0	0	0	0	0	0	0	0
4	PSMB9	0	0	0	0	0	0	0	0	0	0	0	0	0	0	0	0	0	0	0	0	0	0	0	0	0	0	0	0	-7.14077	-8.22448	-7.63765	-7.14165	0	0	0
4	TAP1	0	0	0	0	0	0	0	0	0	0	0	0	0	0	0	0	0	0	0	0	0	0	0	0	0	0	0	0	-7.76811	-8.7895	-8.81718	-7.44429	0	0	0
4	PSMB8	0	0	0	0	0	0	0	0	0	0	0	0	0	0	0	0	0	0	0	0	0	0	0	0	0	0	0	0	-7.17816	-7.53511	-7.71551	-7.34439	0	0	0
4	PSME2	0	0	0	0	0	0	0	0	0	0	0	0	0	0	0	0	0	0	0	0	0	0	0	0	0	0	0	0	-8.95836	-8.32539	0	-8.03971	0	0	0
4	SOD2	0	0	0	0	0	0	0	0	0	0	0	0	0	0	0	0	0	0	0	0	0	0	0	0	0	0	0	0	-7.91312	-8.90071	-8.37969	0	0	0	0
4	IFI30	0	0	0	0	0	0	0	0	0	0	0	0	0	0	0	0	0	0	0	0	0	0	0	0	0	0	0	0	-8.74378	-9.97793	-9.37921	0	0	0	0
4	CCL5	0	0	0	0	0	0	0	0	0	0	0	0	0	0	0	0	0	0	0	0	0	0	0	0	0	0	0	0	-7.47869	-8.21634	-8.05868	0	0	0	0
4	TNFSF13B	0	0	0	0	0	0	0	0	0	0	0	0	0	0	0	0	0	0	0	0	0	0	0	0	0	0	0	0	-7.19135	-8.55635	-8.14886	0	0	0	0
4	PTPN22	0	0	0	0	0	0	0	0	0	0	0	0	0	0	0	0	0	0	0	0	0	0	0	0	0	0	0	0	-7.55893	-9.15813	-8.30601	0	0	0	0
4	LILRB4	0	0	0	0	0	0	0	0	0	0	0	0	0	0	0	0	0	0	0	0	0	0	0	0	0	0	0	0	-7.18737	-8.17942	-7.22812	0	0	0	0
4	GBP4	0	0	0	0	0	0	0	0	0	0	0	0	0	0	0	0	0	0	0	0	0	0	0	0	0	0	0	0	-7.60471	-8.66144	-7.83285	0	0	0	0
4	LACTB	0	0	0	0	0	0	0	0	0	0	0	0	0	0	0	0	0	0	0	0	0	0	0	0	0	0	0	0	-8.59793	-7.7574	-7.59269	0	0	0	0
4	SECTM1	0	0	0	0	0	0	0	0	0	0	0	0	0	0	0	0	0	0	0	0	0	0	0	0	0	0	0	-7.115	0	-7.74806	-7.75138	0	0	-8.49863	0
4	CTSB	0	0	0	0	0	0	0	0	0	0	0	0	0	0	0	0	0	0	0	0	0	0	0	0	0	0	0	-7.351	0	-8.5188	-9.19341	0	0	0	0
4	STK17B	0	0	0	0	0	0	0	0	0	0	0	0	0	0	0	0	0	0	0	0	0	0	0	0	0	0	0	-7.2678	-7.483	-7.26865	-7.61348	0	0	0	0
4	VTCN1	0	0	0	0	0	0	0	0	0	0	0	0	0	0	0	0	0	0	0	0	0	0	0	0	0	0	0	-7.56948	-7.56912	-8.08982	-8.2391	0	0	0	0
4	GBP5	0	0	0	0	0	0	0	0	0	0	0	0	0	0	0	0	0	0	0	0	0	0	0	0	0	0	0	-7.44422	-8.05546	-8.03682	-8.94942	0	0	0	0
4	APOC1	0	0	0	0	0	0	0	0	0	0	0	0	0	0	0	0	0	0	0	0	0	0	0	0	0	0	0	0	-7.18969	-8.27507	0	0	0	0	0
4	NCF1	0	0	0	0	0	0	0	0	0	0	0	0	0	0	0	0	0	0	0	0	0	0	0	0	0	0	0	0	-7.35641	-8.68677	0	0	0	0	0
4	CD86	0	0	0	0	0	0	0	0	0	0	0	0	0	0	0	0	0	0	0	0	0	0	0	0	0	0	0	0	-7.12542	-9.19536	0	0	0	0	0
4	FBXO6	0	0	0	0	0	0	0	0	0	0	0	0	0	0	0	0	0	0	0	0	0	0	0	0	0	0	0	0	-7.87657	-7.73134	0	0	0	0	0
4	CD69	0	0	0	0	0	0	0	0	0	0	0	0	0	0	0	0	0	0	0	0	0	0	0	0	0	0	0	0	-8.23925	-7.90351	0	0	0	0	0
4	PSTPIP2	0	0	0	0	0	0	0	0	0	0	0	0	0	0	0	0	0	0	0	0	0	0	0	0	0	0	0	0	-8.13445	-7.57837	0	0	0	0	0
4	CYBA	0	0	0	0	0	0	0	0	0	0	0	0	0	0	0	0	0	0	0	0	0	0	0	0	0	0	0	0	-7.33666	-7.49847	0	0	0	0	0
4	SLC31A2	0	0	0	0	0	0	0	0	0	0	0	0	0	0	0	0	0	0	0	0	0	0	0	0	0	-7.48031	0	0	-8.11522	-7.8202	0	0	0	0	0
4	NOD2	0	0	0	0	0	0	0	0	0	0	0	0	0	0	0	0	0	0	0	0	0	0	0	0	0	0	0	0	0	-8.94295	-7.31269	0	0	0	0
4	TLR2	0	0	0	0	0	0	0	0	0	0	0	0	0	0	0	0	0	0	0	0	0	0	0	0	0	0	0	0	0	-9.11975	-7.3966	0	0	0	0
4	CTSS	0	0	0	0	0	0	0	0	0	0	0	0	0	0	0	0	0	0	0	0	0	0	0	0	0	0	0	0	0	-10.374	-8.57904	0	0	0	0
4	CCR5	0	0	0	0	0	0	0	0	0	0	0	0	0	0	0	0	0	0	0	0	0	0	0	0	0	0	0	0	0	-8.38839	-7.03665	0	0	0	0
4	C1QA	0	0	0	0	0	0	0	0	0	0	0	0	0	0	0	0	0	0	0	0	0	0	0	0	0	0	0	0	0	-8.55921	-7.22494	0	0	0	0
4	GPRIN3	0	0	0	0	0	0	0	0	0	0	0	0	0	0	0	0	0	0	0	0	0	0	0	0	0	0	0	0	0	-8.12888	-7.05309	0	0	0	0
4	SLA	0	0	0	0	0	0	0	0	0	0	0	0	0	0	0	0	0	0	0	0	0	0	0	0	0	0	0	0	0	-9.67076	-8.38541	0	0	0	0
4	CLEC7A	0	0	0	0	0	0	0	0	0	0	0	0	0	0	0	0	0	0	0	0	0	0	0	0	0	0	0	0	0	-8.85936	-7.72756	0	0	0	0
4	LILRB1	0	0	0	0	0	0	0	0	0	0	0	0	0	0	0	0	0	0	0	0	0	0	0	0	0	0	0	0	0	-8.27558	-7.0875	0	0	0	0
4	TNFSF10	0	0	0	0	0	0	0	0	0	0	0	0	0	0	0	0	0	0	0	0	0	0	0	0	0	0	0	0	0	-9.47401	-7.14902	0	0	0	0
4	ACP5	0	0	0	0	0	0	0	0	0	0	0	0	0	0	0	0	0	0	0	0	0	0	0	0	0	0	0	0	0	-7.87525	-7.08331	0	0	0	0
4	TNFAIP8	0	0	0	0	0	0	0	0	0	0	0	0	0	0	0	0	0	0	0	0	0	0	0	0	0	0	0	0	0	-8.10422	-7.60894	0	0	0	0
4	GNB4	0	0	0	0	0	0	0	0	0	0	0	0	0	0	0	0	0	0	0	0	0	0	0	0	0	0	0	0	0	-7.12287	-7.32417	0	0	0	0
4	HLA-A	0	0	0	0	0	0	0	0	0	0	0	0	0	0	0	0	0	0	0	0	0	0	0	0	0	0	0	0	0	-7.92592	-8.18425	0	0	0	0
4	HLA-F	0	0	0	0	0	0	0	0	0	0	0	0	0	0	0	0	0	0	0	0	0	0	0	0	0	0	0	0	0	-8.20538	-8.64236	0	0	0	0
4	B2M	0	0	0	0	0	0	0	0	0	0	0	0	0	0	0	0	0	0	0	0	0	0	0	0	0	0	0	0	0	-7.59122	-7.52814	0	0	0	0
4	IL2RB	0	0	0	0	0	0	0	0	0	0	0	0	0	0	0	0	0	0	0	0	0	0	0	0	0	0	0	0	0	-7.29585	-8.00025	0	0	0	0
4	KYNU	0	0	0	0	0	0	0	0	0	0	0	0	0	0	0	0	0	0	0	0	0	0	0	0	0	0	0	0	0	-7.56961	-8.26158	0	0	0	0
4	NCF2	0	0	0	0	0	0	0	0	0	0	0	0	0	0	0	0	0	0	0	0	0	0	-7.26424	0	0	0	0	0	0	-9.12454	-8.35187	0	0	0	0
4	SLAMF8	0	0	0	0	0	0	0	0	0	0	0	0	0	0	0	-7.17446	0	0	0	0	0	0	0	0	0	0	0	0	0	-7.77341	-7.35879	0	0	0	0
4	APOL6	0	0	0	0	0	0	0	0	0	0	0	0	0	0	0	0	0	0	0	0	0	0	0	0	-7.80052	0	-9.03676	-8.25525	-7.47821	-9.42038	-9.46994	-7.61508	0	-7.50229	-8.72666
4	RARRES3	0	0	0	0	0	0	0	0	0	0	0	0	0	0	0	0	0	0	0	0	0	0	0	0	0	0	-8.66293	-7.71542	0	-7.95339	-7.33363	-8.30944	0	-10.5622	-8.3846
4	SQSTM1	0	0	0	0	0	0	0	0	0	0	0	0	0	0	0	0	0	0	0	0	0	0	0	0	0	-7.73365	-7.82208	0	0	-8.36667	-9.02195	-7.60385	0	-8.31938	-7.28561
4	TAP2	0	0	0	0	0	0	0	0	0	0	0	0	0	0	0	0	0	0	0	0	0	0	0	0	0	0	0	0	0	-8.79289	-8.75404	-7.94233	0	-7.86904	0
4	TAPBP	0	0	0	0	0	0	0	0	0	0	0	0	0	0	0	0	0	0	0	0	0	0	0	0	0	0	0	0	0	-7.99027	-8.30995	-9.74668	-7.0759	-8.2678	-7.79527
4	ARRDC2	0	0	0	0	0	0	0	0	0	0	0	0	0	0	0	0	0	0	0	0	0	0	0	0	0	0	0	0	0	-8.49982	-8.03315	0	0	-8.0583	-7.5003
4	LGALS9	0	0	0	0	0	0	0	0	0	0	0	0	0	0	0	0	0	0	0	0	0	0	0	0	0	0	0	0	0	-10.3308	-9.75965	-7.85554	0	-8.85473	-9.75497
4	IFI16	0	0	0	0	0	0	0	0	0	0	0	0	0	0	0	0	0	0	0	0	0	0	0	0	0	0	0	0	0	-7.71772	-8.49133	-7.75973	0	0	-7.55234
4	CIITA	0	0	0	0	0	0	0	0	0	0	0	0	0	0	0	0	0	0	0	0	0	0	0	0	0	0	0	0	0	-8.62843	-8.5987	-8.29648	0	0	-8.92706
4	CFB	0	0	0	0	0	0	0	0	0	0	0	0	0	0	0	0	0	0	0	0	0	0	0	0	0	0	-7.53717	0	0	-7.74131	-8.11441	-10.0306	0	0	-7.50253
4	PSMB10	0	0	0	0	0	0	0	0	0	0	0	0	0	0	0	0	0	0	0	0	0	0	0	0	0	0	0	0	-7.37395	-9.41295	-8.15422	-8.26479	0	-8.01969	-7.69987
4	IRF1	0	0	0	0	0	0	0	0	0	0	0	0	0	0	0	0	0	0	0	0	0	0	0	0	0	0	0	0	-7.31285	-10.9564	-8.23107	-8.61252	0	0	-7.12654
4	NTN4	0	0	0	0	0	0	0	0	0	0	0	0	0	0	0	0	0	0	0	0	0	0	0	0	0	0	0	0	0	-7.40397	0	0	0	0	-7.39562
4	NFKB1	0	0	0	0	0	0	0	0	0	0	0	0	0	0	0	0	0	0	0	0	0	0	0	0	0	0	0	0	0	-8.01119	0	0	0	0	-7.99594
4	PDZK1IP1	0	0	0	0	0	0	0	0	0	0	0	0	0	0	0	0	0	0	0	0	0	0	0	0	0	0	0	0	0	-8.41679	0	-7.13111	0	0	-7.96622
4	CXCL16	0	0	0	0	0	0	0	0	0	0	0	0	0	0	0	0	0	0	0	0	0	0	0	0	0	0	0	0	0	-8.58248	0	0	0	-7.26562	-7.28628
4	TNFRSF14	0	0	0	0	0	0	0	0	0	0	0	0	0	0	0	0	0	0	0	0	0	0	0	0	0	0	0	0	0	-8.01042	0	0	0	-8.96924	-8.79462
4	FAM120A	0	0	0	0	0	0	0	0	0	0	0	0	0	0	0	0	0	0	0	0	0	0	0	0	0	0	-7.41402	-7.25319	0	-7.754	0	0	0	-9.89109	-8.36074
4	CBR3	0	0	0	0	0	0	0	0	0	0	0	0	0	0	0	0	0	0	0	0	0	0	0	0	0	0	0	0	0	-7.15908	0	0	0	-7.49364	0
4	TNFRSF11A	0	0	0	0	0	0	0	0	0	0	0	0	0	0	0	0	0	0	0	0	0	0	0	0	0	0	0	0	0	-7.33137	0	0	0	-7.62929	0
4	FUT2	0	0	0	0	0	0	0	0	0	0	0	0	0	0	0	0	0	0	0	0	0	0	0	0	0	0	0	0	0	-7.23853	0	0	0	-7.76634	0
4	SP100	0	0	0	0	0	0	0	0	0	0	0	0	0	0	0	0	0	0	0	0	0	0	0	0	0	0	0	0	0	-8.21094	-7.56605	-7.04479	0	0	0
4	IFIH1	0	0	0	0	0	0	0	0	0	0	0	0	0	0	0	0	0	0	0	0	0	0	0	0	0	0	0	0	0	-8.26535	-7.1308	-7.02158	0	0	0
4	PARP14	0	0	0	0	0	0	0	0	0	0	0	0	0	0	0	0	0	0	0	0	0	0	0	0	0	0	0	0	0	-8.22721	-7.20066	-7.89993	0	0	0
4	DTX3L	0	0	0	0	0	0	0	0	0	0	0	0	0	0	0	0	0	0	0	0	0	0	0	0	0	0	0	0	0	-8.12752	-8.16339	-7.23391	0	0	0
4	IL4I1	0	0	0	0	0	0	0	0	0	0	0	0	0	0	0	0	0	0	0	0	0	0	0	0	0	0	0	0	0	-8.32722	-8.30091	-7.9869	0	0	0
4	LCN2	0	0	0	0	0	0	0	0	0	0	0	0	0	0	0	0	0	0	0	0	0	-7.81606	0	0	0	0	0	0	0	-8.78214	-7.9179	-7.284	0	0	0
4	OPTN	0	0	0	0	0	0	0	0	0	0	0	0	0	0	0	0	0	0	0	0	0	0	0	0	0	0	0	0	0	0	-7.21179	-9.02945	0	0	0
4	NMI	0	0	0	0	0	0	0	0	0	0	0	0	0	0	0	0	0	0	0	0	0	0	0	0	0	0	0	0	0	-7.07636	0	-7.39748	0	0	0
4	CXCL10	0	0	0	0	0	0	0	0	0	0	0	0	0	0	0	0	0	0	0	0	0	0	0	0	0	0	0	0	0	-7.39317	0	-7.18008	0	0	0
4	XAF1	0	0	0	0	0	0	0	0	0	0	0	0	0	0	0	0	0	0	0	0	0	0	0	0	0	0	0	0	0	-7.60665	0	-7.04087	0	0	0
4	RTP4	0	0	0	0	0	0	0	0	0	0	0	0	0	0	0	0	0	0	0	0	0	0	0	0	0	0	0	0	0	-8.12653	0	-7.17442	0	0	0
4	SFN	0	0	0	0	0	0	0	0	0	0	0	0	0	0	0	0	0	0	0	0	0	0	0	0	0	0	0	0	-7.1649	-8.15971	-7.55073	0	0	-7.13377	0
4	BCL3	0	0	0	0	0	0	0	0	0	0	0	0	0	0	0	0	0	0	0	0	0	0	0	0	0	0	0	0	-7.02098	-7.75788	-8.48982	0	0	-8.02855	0
4	HLA-C	0	0	0	0	0	0	0	0	0	0	0	0	0	0	0	0	0	0	0	0	0	0	0	0	0	0	0	0	-7.12725	-8.66543	-9.14089	0	0	-7.06144	0
4	HLA-B	0	0	0	0	0	0	0	0	0	0	0	0	0	0	0	0	0	0	0	0	0	0	0	0	0	0	0	0	-7.0047	-8.2771	-9.27807	0	0	-7.2676	0
4	IL15RA	0	0	0	0	0	0	0	0	0	0	0	0	0	0	0	0	0	0	0	0	0	0	0	0	0	0	0	0	-7.9403	-9.2544	-8.63127	0	0	-7.87606	-7.11986
4	CDCP1	0	0	0	0	0	0	0	0	0	0	0	0	0	0	0	0	0	0	0	0	0	0	0	0	0	0	0	0	-8.22757	-9.20244	-9.88024	0	0	-8.99245	-7.96253
4	SREBF1	0	0	0	0	0	0	0	0	0	0	0	0	0	0	0	0	0	0	0	0	0	0	0	0	0	0	0	0	-7.11375	0	-7.56335	0	0	-7.68866	0
4	GBP1	0	0	0	0	0	0	0	0	0	0	0	0	0	0	0	0	0	0	0	0	0	0	0	0	0	0	0	0	-7.0613	0	-7.72785	0	0	0	0
4	SERPINB1	0	0	0	0	0	0	0	0	0	0	0	0	0	0	0	0	0	0	0	0	0	0	0	0	0	0	0	0	0	-8.01781	-7.18907	0	0	-7.49031	0
4	MLKL	0	0	0	0	0	0	0	0	0	0	0	0	0	0	0	0	0	0	0	0	0	0	0	0	0	0	0	0	0	-9.12235	-7.97857	0	0	-8.20969	0
4	ELF3	0	0	0	0	0	0	0	0	0	0	0	0	0	0	0	0	0	0	0	0	0	0	0	0	0	0	0	0	0	-8.75984	-7.8411	0	0	-9.43844	0
4	HTR3A	0	0	0	0	0	0	0	0	0	0	0	0	0	0	0	0	0	0	0	0	0	0	0	0	0	0	0	0	0	-7.90344	-8.46575	0	0	-8.12596	0
4	MUC1	0	0	0	0	0	0	0	0	0	0	0	0	0	0	0	0	0	0	0	0	0	0	0	0	0	0	0	0	0	-7.13312	-9.3205	0	0	-10.3446	0
4	SBNO2	0	0	0	0	0	0	0	0	0	0	0	0	0	0	0	0	0	0	0	0	0	0	0	0	0	0	0	0	0	0	-7.17202	0	0	-7.30127	-7.07796
4	SAA2	0	0	0	0	0	0	0	0	0	0	0	0	0	0	0	0	0	0	0	0	0	0	0	0	0	0	0	0	0	0	-7.06777	0	0	-7.10449	-7.35632
4	LDLR	0	0	0	0	0	0	0	0	0	0	0	0	0	0	0	0	0	0	0	0	0	0	-7.65668	0	0	0	0	0	0	0	-7.26205	0	0	-7.36604	-7.24352
4	SAA1	0	0	0	0	0	0	0	0	0	0	0	0	0	0	0	0	0	0	0	0	0	0	0	0	0	0	0	0	0	0	-7.0382	0	0	-7.42983	0
4	ZCCHC6	0	0	0	0	0	0	0	0	0	0	0	0	0	0	0	0	0	0	0	0	0	0	0	0	0	0	0	0	0	0	-7.10237	0	0	-7.54523	0
4	PIGR	0	0	0	0	0	0	0	0	0	0	0	0	0	0	0	0	0	0	0	0	0	0	0	0	0	0	0	0	0	0	-7.31197	0	0	-8.30958	0
4	GMDS	0	0	0	0	0	0	0	0	0	0	0	0	0	0	0	0	0	0	0	0	0	0	0	0	0	0	0	0	0	0	-7.55516	0	0	-7.03476	0
4	LRG1	0	0	0	0	0	0	0	0	0	0	0	0	0	0	0	0	0	0	0	0	0	0	0	0	0	0	0	0	0	0	-8.28127	0	0	-7.36052	0
4	TMPRSS4	0	0	0	0	0	0	0	0	0	0	0	0	0	0	0	0	0	0	0	0	0	0	0	-7.6072	0	0	0	0	-7.36951	0	-7.33239	0	0	0	0
4	ETS1	0	0	0	0	0	0	0	0	0	0	0	0	0	0	0	0	0	0	0	0	0	0	0	-7.36221	0	0	0	0	0	0	-8.11727	0	0	0	0
4	HLA-G	0	0	0	0	0	0	0	0	0	0	0	0	0	0	0	0	0	0	0	0	0	0	0	0	0	0	0	0	0	0	-7.69787	0	0	0	0
4	RAB27A	0	0	0	0	0	0	0	0	0	0	0	0	0	0	0	0	0	0	0	0	0	0	0	0	0	0	0	0	0	0	-8.17042	0	0	0	0
4	CD55	0	0	0	0	0	0	0	0	0	0	0	0	0	0	0	0	0	0	0	0	0	0	0	0	0	0	0	0	0	0	-7.61957	0	0	0	0
4	KLF7	0	0	0	0	0	0	0	0	0	0	0	0	0	0	0	0	0	0	0	0	0	0	0	0	0	0	0	0	0	0	-7.38144	0	0	0	0
4	PARP9	0	0	0	0	0	0	0	0	0	0	0	0	0	0	0	0	0	0	0	0	0	0	0	0	0	0	0	0	0	0	-7.2373	0	0	0	0
4	CDR2L	0	0	0	0	0	0	0	0	0	0	0	0	0	0	0	0	0	0	0	0	0	0	0	0	0	0	0	0	0	0	-7.17335	0	0	0	0
4	GM2A	0	0	0	0	0	0	0	0	0	0	0	0	0	0	0	0	0	0	0	0	0	0	0	0	0	0	0	0	0	0	-7.1558	0	0	0	0
4	PYHIN1	0	0	0	0	0	0	0	0	0	0	0	0	0	0	0	0	0	0	0	0	0	0	0	0	0	0	0	0	0	0	-7.08364	0	0	0	0
4	HTRA4	0	0	0	0	0	0	0	0	0	0	0	0	0	0	0	0	0	0	0	0	0	0	0	0	0	0	0	0	0	0	-7.01602	0	0	0	0
4	CD2	0	0	0	0	0	0	0	0	0	0	0	0	0	0	0	0	0	0	0	0	0	0	0	0	0	0	0	0	0	-7.30377	0	0	0	0	0
4	LYZ	0	0	0	0	0	0	0	0	0	0	0	0	0	0	0	0	0	0	0	0	0	0	0	0	0	0	0	0	0	-7.40035	0	0	0	0	0
4	CD37	0	0	0	0	0	0	0	0	0	0	0	0	0	0	0	0	0	0	0	0	0	0	0	0	0	0	0	0	0	-8.09832	0	0	0	0	0
4	CPNE2	0	0	0	0	0	0	0	0	0	0	0	0	0	0	0	0	0	0	0	0	0	0	0	0	0	0	0	0	0	-8.11652	0	0	0	0	0
4	TBC1D8	0	0	0	0	0	0	0	0	0	0	0	0	0	0	0	0	0	0	0	0	0	0	0	0	0	0	0	0	0	-7.77413	0	0	0	0	0
4	GPR132	0	0	0	0	0	0	0	0	0	0	0	0	0	0	0	0	0	0	0	0	0	0	0	0	0	0	0	0	0	-7.26404	0	0	0	0	0
4	RGS18	0	0	0	0	0	0	0	0	0	0	0	0	0	0	0	0	0	0	0	0	0	0	0	0	0	0	0	0	0	-7.26368	0	0	0	0	0
4	TFEC	0	0	0	0	0	0	0	0	0	0	0	0	0	0	0	0	0	0	0	0	0	0	0	0	0	0	0	0	0	-8.62075	0	0	0	0	0
4	DHX58	0	0	0	0	0	0	0	0	0	0	0	0	0	0	0	0	0	0	0	0	0	0	0	0	0	0	0	0	0	-7.07047	0	0	0	0	0
4	GPR84	0	0	0	0	0	0	0	0	0	0	0	0	0	0	0	0	0	0	0	0	0	0	0	0	0	0	0	0	0	-8.27919	0	0	0	0	0
4	LST1	0	0	0	0	0	0	0	0	0	0	0	0	0	0	0	0	0	0	0	0	0	0	0	0	0	0	0	0	0	-8.17941	0	0	0	0	0
4	BIN2	0	0	0	0	0	0	0	0	0	0	0	0	0	0	0	0	0	0	0	0	0	0	0	0	0	0	0	0	0	-8.14774	0	0	0	0	0
4	DAPP1	0	0	0	0	0	0	0	0	0	0	0	0	0	0	0	0	0	0	0	0	0	0	0	0	0	0	0	0	0	-8.08606	0	0	0	0	0
4	GIMAP2	0	0	0	0	0	0	0	0	0	0	0	0	0	0	0	0	0	0	0	0	0	0	0	0	0	0	0	0	0	-8.05886	0	0	0	0	0
4	ERBB3	0	0	0	0	0	0	0	0	0	0	0	0	0	0	0	0	0	0	0	0	0	0	0	0	0	0	0	0	0	-7.98216	0	0	0	0	0
4	SLC15A3	0	0	0	0	0	0	0	0	0	0	0	0	0	0	0	0	0	0	0	0	0	0	0	0	0	0	0	0	0	-7.92566	0	0	0	0	0
4	GPR65	0	0	0	0	0	0	0	0	0	0	0	0	0	0	0	0	0	0	0	0	0	0	0	0	0	0	0	0	0	-7.91479	0	0	0	0	0
4	C1QB	0	0	0	0	0	0	0	0	0	0	0	0	0	0	0	0	0	0	0	0	0	0	0	0	0	0	0	0	0	-7.89549	0	0	0	0	0
4	HCK	0	0	0	0	0	0	0	0	0	0	0	0	0	0	0	0	0	0	0	0	0	0	0	0	0	0	0	0	0	-7.87452	0	0	0	0	0
4	IL15	0	0	0	0	0	0	0	0	0	0	0	0	0	0	0	0	0	0	0	0	0	0	0	0	0	0	0	0	0	-7.83507	0	0	0	0	0
4	IKBKE	0	0	0	0	0	0	0	0	0	0	0	0	0	0	0	0	0	0	0	0	0	0	0	0	0	0	0	0	0	-7.76621	0	0	0	0	0
4	FMNL1	0	0	0	0	0	0	0	0	0	0	0	0	0	0	0	0	0	0	0	0	0	0	0	0	0	0	0	0	0	-7.71207	0	0	0	0	0
4	TRIM21	0	0	0	0	0	0	0	0	0	0	0	0	0	0	0	0	0	0	0	0	0	0	0	0	0	0	0	0	0	-7.70852	0	0	0	0	0
4	TRPV2	0	0	0	0	0	0	0	0	0	0	0	0	0	0	0	0	0	0	0	0	0	0	0	0	0	0	0	0	0	-7.68967	0	0	0	0	0
4	CCDC109B	0	0	0	0	0	0	0	0	0	0	0	0	0	0	0	0	0	0	0	0	0	0	0	0	0	0	0	0	0	-7.66468	0	0	0	0	0
4	RHBDF2	0	0	0	0	0	0	0	0	0	0	0	0	0	0	0	0	0	0	0	0	0	0	0	0	0	0	0	0	0	-7.65299	0	0	0	0	0
4	RHOG	0	0	0	0	0	0	0	0	0	0	0	0	0	0	0	0	0	0	0	0	0	0	0	0	0	0	0	0	0	-7.65026	0	0	0	0	0
4	SLC11A1	0	0	0	0	0	0	0	0	0	0	0	0	0	0	0	0	0	0	0	0	0	0	0	0	0	0	0	0	0	-7.61691	0	0	0	0	0
4	FBP1	0	0	0	0	0	0	0	0	0	0	0	0	0	0	0	0	0	0	0	0	0	0	0	0	0	0	0	0	0	-7.59878	0	0	0	0	0
4	EIF4E3	0	0	0	0	0	0	0	0	0	0	0	0	0	0	0	0	0	0	0	0	0	0	0	0	0	0	0	0	0	-7.572	0	0	0	0	0
4	IGSF6	0	0	0	0	0	0	0	0	0	0	0	0	0	0	0	0	0	0	0	0	0	0	0	0	0	0	0	0	0	-7.45198	0	0	0	0	0
4	RTN2	0	0	0	0	0	0	0	0	0	0	0	0	0	0	0	0	0	0	0	0	0	0	0	0	0	0	0	0	0	-7.44121	0	0	0	0	0
4	SP140	0	0	0	0	0	0	0	0	0	0	0	0	0	0	0	0	0	0	0	0	0	0	0	0	0	0	0	0	0	-7.3336	0	0	0	0	0
4	RIPK3	0	0	0	0	0	0	0	0	0	0	0	0	0	0	0	0	0	0	0	0	0	0	0	0	0	0	0	0	0	-7.27511	0	0	0	0	0
4	SPPL2A	0	0	0	0	0	0	0	0	0	0	0	0	0	0	0	0	0	0	0	0	0	0	0	0	0	0	0	0	0	-7.26949	0	0	0	0	0
4	TICAM1	0	0	0	0	0	0	0	0	0	0	0	0	0	0	0	0	0	0	0	0	0	0	0	0	0	0	0	0	0	-7.16165	0	0	0	0	0
4	CCL2	0	0	0	0	0	0	0	0	0	0	0	0	0	0	0	0	0	0	0	0	0	0	0	0	0	0	0	0	0	-7.1445	0	0	0	0	0
4	TNFRSF10A	0	0	0	0	0	0	0	0	0	0	0	0	0	0	0	0	0	0	0	0	0	0	0	0	0	0	0	0	0	-7.11536	0	0	0	0	0
4	CCDC69	0	0	0	0	0	0	0	0	0	0	0	0	0	0	0	0	0	0	0	0	0	0	0	0	0	0	0	0	0	-7.02843	0	0	0	0	0
4	ARHGAP15	0	0	0	0	0	0	0	0	0	0	0	0	0	0	0	0	0	0	0	0	0	0	0	0	0	0	0	0	0	-7.01771	0	0	0	0	0
4	SRGN	0	0	0	0	0	0	0	0	0	0	0	0	0	0	0	0	0	0	0	0	0	0	0	0	0	0	0	0	0	-7.14295	0	0	0	0	0
4	CD163	0	0	0	0	0	0	0	0	0	0	0	0	0	0	0	0	0	0	0	0	0	0	0	0	0	0	0	0	0	-7.72623	0	0	0	0	0
4	SLC28A3	0	0	0	0	0	0	0	0	0	0	0	0	0	0	0	0	0	0	0	0	0	0	0	0	0	0	0	0	0	-7.95427	0	0	0	0	0
4	HCLS1	0	0	0	0	0	0	0	0	0	0	0	0	0	0	0	0	0	0	0	0	0	0	0	0	0	0	0	0	0	-7.04852	0	0	0	0	0
4	CEACAM1	0	0	0	0	0	0	0	0	0	0	0	0	0	0	0	0	0	0	0	0	0	0	0	0	0	0	0	0	0	-7.98893	0	0	0	0	0
4	TMEM87B	0	0	0	0	0	0	0	0	0	0	0	0	0	0	0	0	0	0	0	0	0	0	0	0	0	0	0	0	0	-7.27041	0	0	0	0	0
4	LY86	0	0	0	0	0	0	0	0	0	0	0	0	0	0	0	0	0	0	0	0	0	0	0	0	0	0	0	0	0	-7.32154	0	0	0	0	0
4	LILRB2	0	0	0	0	0	0	0	0	0	0	0	0	0	0	0	0	0	0	0	0	0	0	0	0	0	0	0	0	0	-7.43416	0	0	0	0	0
4	BATF2	0	0	0	0	0	0	0	0	0	0	0	0	0	0	0	0	0	0	0	0	0	0	0	0	0	0	0	0	0	-7.5522	0	0	0	0	0
4	PIK3CG	0	0	0	0	0	0	0	0	0	0	0	0	0	0	0	0	0	0	0	0	0	0	0	0	0	0	0	0	0	-7.25277	0	0	0	0	0
4	APOBEC3G	0	0	0	0	0	0	0	0	0	0	0	0	0	0	0	0	0	0	0	0	0	0	0	0	0	0	0	0	0	-7.25726	0	0	0	0	0
4	UBD	0	0	0	0	0	0	0	0	0	0	0	0	0	0	0	0	0	0	0	0	0	0	0	0	0	0	0	0	0	-7.48236	0	0	0	0	0
4	OSCAR	0	0	0	0	0	0	0	0	0	0	0	0	0	0	0	0	0	0	0	0	0	0	0	0	0	0	0	0	0	-8.3758	0	0	0	0	0
4	GNA15	0	0	0	0	0	0	0	0	0	0	0	0	0	0	0	0	0	0	0	0	0	0	0	0	0	0	0	0	0	-8.37589	0	0	0	0	0
4	BIRC3	0	0	0	0	0	0	0	0	0	0	0	0	0	0	0	0	0	0	0	0	0	0	0	0	0	0	0	0	0	-7.33887	0	0	0	0	0
4	SPP1	0	0	0	0	0	0	0	0	0	0	0	0	0	0	0	0	0	0	0	0	0	0	0	0	0	0	0	0	0	-7.02147	0	0	0	0	0
4	IRF2	0	0	0	0	0	0	0	0	0	0	0	0	0	0	0	0	0	0	0	0	0	0	0	0	0	0	0	0	0	-7.56603	0	0	0	0	0
4	FGR	0	0	0	0	0	0	0	0	0	0	0	0	0	0	0	0	0	0	0	0	0	0	0	0	0	0	0	0	0	-8.06705	0	0	0	0	0
4	FGL2	0	0	0	0	0	0	0	0	0	0	0	0	0	0	0	0	0	0	0	0	0	0	0	0	0	0	0	0	0	-7.58905	0	0	0	0	0
4	TBXAS1	0	0	0	0	0	0	0	0	0	0	0	0	0	0	0	0	0	0	0	0	0	0	0	0	0	0	0	0	0	-8.10925	0	0	0	0	0
4	NPL	0	0	0	0	0	0	0	0	0	0	0	0	0	0	0	0	0	0	0	0	0	0	0	0	0	0	0	0	0	-7.52833	0	0	0	0	0
4	MYD88	0	0	0	0	0	0	0	0	0	0	0	0	0	0	0	0	0	0	0	0	0	0	0	0	0	0	0	0	0	-7.46601	0	0	0	0	0
4	GPSM3	0	0	0	0	0	0	0	0	0	0	0	0	0	0	0	0	0	0	0	0	0	0	0	0	0	0	0	0	0	-7.19349	0	0	0	0	0
4	CD84	0	0	0	0	0	0	0	0	0	0	0	0	0	0	0	0	0	0	0	0	0	0	0	0	0	0	0	0	0	-8.4379	0	0	0	0	0
4	SIGLEC1	0	0	0	0	0	0	0	0	0	0	0	0	0	0	0	0	0	0	0	0	0	0	0	0	0	0	0	0	0	-8.57666	0	0	0	0	0
4	TRIM14	0	0	0	0	0	0	0	0	0	0	0	0	0	0	0	0	0	0	0	0	0	0	0	0	0	0	0	0	0	-7.82579	0	0	0	0	0
4	NCF4	0	0	0	0	0	0	0	0	0	0	0	0	0	0	0	0	0	0	0	0	0	0	0	0	0	0	0	0	0	-7.67019	0	0	0	0	0
4	TRAF3IP3	0	0	0	0	0	0	0	0	0	0	0	0	0	0	0	0	0	0	0	0	0	0	0	0	0	0	0	0	0	-7.6414	0	0	0	0	0
4	MNDA	0	0	0	0	0	0	0	0	0	0	0	0	0	0	0	0	0	0	0	0	0	0	0	0	0	0	0	0	0	-7.39434	0	0	0	0	0
4	CALCOCO2	0	0	0	0	0	0	0	0	0	0	0	0	0	0	0	0	0	0	0	0	0	0	0	0	0	0	0	0	0	-7.12998	0	0	0	0	0
4	GPR141	0	0	0	0	0	0	0	0	0	0	0	0	0	0	0	0	0	0	0	0	0	0	0	0	0	0	0	0	0	-8.76627	0	0	0	0	0
4	CFLAR	0	0	0	0	0	0	0	0	0	0	0	0	0	0	0	0	0	0	0	0	0	0	0	0	0	0	0	0	0	-8.79036	0	0	0	0	0
4	TLR1	0	0	0	0	0	0	0	0	0	0	0	0	0	0	0	0	0	0	0	0	0	0	0	0	0	0	0	0	0	-8.49803	0	0	0	0	0
4	SIGLEC9	0	0	0	0	0	0	0	0	0	0	0	0	0	0	0	0	0	0	0	0	0	0	0	0	0	0	0	0	0	-8.45139	0	0	0	0	0
4	PHF11	0	0	0	0	0	0	0	0	0	0	0	0	0	0	0	0	0	0	0	0	0	0	0	0	0	0	0	0	0	-8.43181	0	0	0	0	0
4	CD300A	0	0	0	0	0	0	0	0	0	0	0	0	0	0	0	0	0	0	0	0	0	0	0	0	0	0	0	0	0	-8.19081	0	0	0	0	0
4	MOBKL2C	0	0	0	0	0	0	0	0	0	0	0	0	0	0	0	0	0	0	0	0	0	0	0	0	0	0	0	0	0	-8.17228	0	0	0	0	0
4	RNASE6	0	0	0	0	0	0	0	0	0	0	0	0	0	0	0	0	0	0	0	0	0	0	0	0	0	0	0	0	0	-8.172	0	0	0	0	0
4	ITGA9	0	0	0	0	0	0	0	0	0	0	0	0	0	0	0	0	0	0	0	0	0	0	0	0	0	0	0	0	0	-8.16826	0	0	0	0	0
4	SPI1	0	0	0	0	0	0	0	0	0	0	0	0	0	0	0	0	0	0	0	0	0	0	0	0	0	0	0	0	0	-8.10435	0	0	0	0	0
4	ARHGAP26	0	0	0	0	0	0	0	0	0	0	0	0	0	0	0	0	0	0	0	0	0	0	0	0	0	0	0	0	0	-7.22716	0	0	0	0	0
4	HK3	0	0	0	0	0	0	0	0	0	0	0	0	0	0	0	0	0	0	0	0	0	0	0	0	0	0	0	0	0	-7.90604	0	0	0	0	0
4	CD4	0	0	0	0	0	0	0	0	0	0	0	0	0	0	0	0	0	0	0	0	0	0	0	0	0	0	0	0	0	-7.89187	0	0	0	0	0
4	CD180	0	0	0	0	0	0	0	0	0	0	0	0	0	0	0	0	0	0	0	0	0	0	0	0	0	0	0	0	0	-7.81097	0	0	0	0	0
4	DEFB1	0	0	0	0	0	0	0	0	0	0	0	0	0	0	0	0	0	0	0	0	0	0	0	0	0	0	0	0	0	-7.72199	0	0	0	0	0
4	OASL	0	0	0	0	0	0	0	0	0	0	0	0	0	0	0	0	0	0	0	0	0	0	0	0	0	0	0	0	0	-7.06486	0	0	0	0	0
4	NFKBIA	0	0	0	0	0	0	0	0	0	0	0	0	0	0	0	0	0	0	0	0	0	0	0	0	0	0	0	0	0	-7.66095	0	0	0	0	0
4	TMEM51	0	0	0	0	0	0	0	0	0	0	0	0	0	0	0	0	0	0	0	0	0	0	0	0	0	0	0	0	0	-7.56634	0	0	0	0	0
4	ITGAL	0	0	0	0	0	0	0	0	0	0	0	0	0	0	0	0	0	0	0	0	0	0	0	0	0	0	0	0	0	-7.40031	0	0	0	0	0
4	SYNGR2	0	0	0	0	0	0	0	0	0	0	0	0	0	0	0	0	0	0	0	0	0	0	0	0	0	0	0	0	0	-7.37273	0	0	0	0	0
4	APOC2	0	0	0	0	0	0	0	0	0	0	0	0	0	0	0	0	0	0	0	0	0	0	0	0	0	0	0	0	0	-7.10572	0	0	0	0	0
4	PRR15	0	0	0	0	0	0	0	0	0	0	0	0	0	0	0	0	0	0	0	0	0	0	0	0	0	0	0	0	0	-7.07435	0	0	0	0	0
4	HNMT	0	0	0	0	0	0	0	0	0	0	0	0	0	0	0	0	0	0	0	0	0	0	0	0	0	0	0	0	0	-7.02197	0	0	0	0	0
4	RAP2B	0	0	0	0	0	0	0	0	0	0	0	0	0	0	0	0	0	0	0	0	0	0	0	0	0	0	0	0	0	-7.09858	0	0	0	0	0
4	LRRFIP2	0	0	0	0	0	0	0	0	0	0	0	0	0	0	0	0	0	0	0	0	0	0	0	0	0	0	0	0	0	-7.41142	0	0	0	0	0
4	TJP3	0	0	0	0	0	0	0	0	0	0	0	0	0	0	0	0	0	0	0	0	0	0	0	0	0	0	0	0	0	-7.44714	0	0	0	0	0
4	TMEM62	0	0	0	0	0	0	0	0	0	0	0	0	0	0	0	0	0	0	0	0	0	0	0	0	0	0	0	0	0	-7.37042	0	0	0	0	0
4	CD80	0	0	0	0	0	0	0	0	0	0	0	0	0	0	0	0	0	0	0	0	0	0	0	0	0	0	0	0	0	-7.51889	0	0	0	0	0
4	ITGA4	0	0	0	0	0	0	0	0	0	0	0	0	0	0	0	0	0	0	0	0	0	0	0	0	0	0	0	0	0	-7.03399	0	0	0	0	0
4	CD48	0	0	0	0	0	0	0	0	0	0	0	0	0	0	0	0	0	0	0	0	0	0	0	0	0	0	0	0	0	-7.79933	0	0	0	0	0
4	ALOX5AP	0	0	0	0	0	0	0	0	0	0	0	0	0	0	0	0	0	0	0	0	0	0	0	0	0	0	0	0	0	-7.71407	0	0	0	0	0
4	ATP8B1	0	0	0	0	0	0	0	0	0	0	0	0	0	0	0	0	0	0	0	0	0	0	0	0	0	0	0	0	0	-7.77973	0	0	0	0	0
4	NLRC4	0	0	0	0	0	0	0	0	0	0	0	0	0	0	0	0	0	0	0	0	0	0	0	0	0	0	0	0	0	-7.87333	0	0	0	0	0
4	LRRC25	0	0	0	0	0	0	0	0	0	0	0	0	0	0	0	0	0	0	0	0	0	0	0	0	0	0	0	0	0	-7.68649	0	0	0	0	0
4	ADAM8	0	0	0	0	0	0	0	0	0	0	0	0	0	0	0	0	0	0	0	0	0	0	0	0	0	0	0	0	0	-7.6537	0	0	0	0	0
4	GIMAP4	0	0	0	0	0	0	0	0	0	0	0	0	0	0	0	0	0	0	-7.03838	-7.15692	0	0	0	0	0	0	-7.05274	0	0	-7.98642	0	0	0	0	0
4	FAM113B	0	0	0	0	0	0	0	0	0	0	0	0	0	0	0	0	0	0	-7.49761	-7.1281	0	0	0	0	0	0	-7.2872	0	0	-8.24749	0	0	0	0	0
4	TNFRSF1B	0	0	0	0	0	0	0	0	0	0	0	0	0	0	0	0	0	0	-7.16885	0	0	0	0	0	0	0	-7.15217	0	0	-8.99729	0	0	0	0	0
4	MS4A6A	0	0	0	0	0	0	0	0	0	0	0	0	0	0	0	0	0	0	-7.13926	-7.14878	0	0	0	0	0	0	0	0	0	-7.52016	0	0	0	0	0
4	C3AR1	0	0	0	0	0	0	0	0	0	0	0	0	0	0	0	0	0	0	-7.12735	-7.18046	0	0	0	0	0	0	0	0	0	-7.89266	0	0	0	0	0
4	GIMAP6	0	0	0	0	0	0	0	0	0	0	0	0	0	0	0	0	0	0	-7.22816	-7.25045	0	0	0	0	0	0	0	0	0	-7.11609	0	0	0	0	0
4	TLR4	0	0	0	0	0	0	0	0	0	0	0	0	0	0	0	0	0	0	-7.91625	-7.95111	0	0	0	0	0	0	0	0	0	-7.56481	0	0	0	0	0
4	GMFG	0	0	0	0	0	0	0	0	0	0	0	0	0	0	0	0	0	0	-7.10577	-7.40964	0	0	0	0	0	0	0	0	0	-7.19621	0	0	0	0	0
4	OLR1	0	0	0	0	0	0	0	0	0	0	0	0	0	0	0	0	0	0	-7.01954	0	0	0	0	0	0	0	0	0	0	-7.6866	0	0	0	0	0
4	DOCK10	0	0	0	0	0	0	0	0	0	0	0	0	0	0	0	0	0	0	-7.18076	0	0	0	0	0	0	0	0	0	0	-7.86614	0	0	0	0	0
4	RAC2	0	0	0	0	0	0	0	0	0	0	0	0	0	0	0	0	0	0	-7.18731	0	0	0	0	0	0	0	0	0	0	-7.94531	0	0	0	0	0
4	CORO1A	0	0	0	0	0	0	0	0	0	0	0	0	0	0	0	0	0	0	-7.57805	0	0	0	0	0	0	0	0	0	0	-8.15076	0	0	0	0	0
4	RCSD1	0	0	0	0	0	0	0	0	0	0	0	0	0	0	0	0	0	0	-7.01993	0	0	0	0	0	0	0	0	0	0	-7.06734	0	0	0	0	0
4	TAGAP	0	0	0	0	0	0	0	0	0	0	0	0	0	0	0	0	0	0	-7.06086	0	0	0	0	0	0	0	0	0	0	-8.50944	0	0	0	0	0
4	SLC43A3	0	0	0	0	0	0	0	0	0	0	0	0	0	0	0	0	0	0	-7.6585	0	0	0	-7.75808	0	0	0	0	0	0	-7.81547	0	0	0	0	0
4	DUSP10	0	0	0	0	0	0	0	0	0	0	0	0	0	0	0	0	0	0	-7.56165	-7.69996	0	0	0	0	0	0	0	0	0	-7.57646	-7.90293	0	0	0	0
4	KLHL6	0	0	0	0	0	0	0	0	0	0	0	0	0	0	0	0	0	0	-8.31084	-8.21495	0	0	0	0	0	0	0	0	0	-8.73007	-8.46281	0	0	0	0
4	SAMD3	0	0	0	0	0	0	0	0	0	0	0	0	0	0	0	0	0	0	-7.3585	-7.26798	0	0	0	0	0	0	0	0	0	-7.01691	-7.02312	0	0	0	0
4	PLEK	0	0	0	0	0	0	0	0	0	0	0	0	0	0	0	0	0	0	-7.36983	-7.35984	0	0	0	0	0	0	0	0	0	-8.45044	-7.34841	0	0	0	0
4	PTPRC	0	0	0	0	0	0	0	0	0	0	0	0	0	0	0	0	0	0	-7.42099	-7.32785	0	0	0	0	0	0	0	0	0	-8.46478	-7.37717	0	0	0	0
4	SAMSN1	0	0	0	0	0	0	0	0	0	0	0	0	0	0	0	0	0	0	-7.08832	-7.05498	0	0	0	0	0	0	0	0	0	-8.258	-7.03522	0	0	0	0
4	AIF1	0	0	0	0	0	0	0	0	0	0	0	0	0	0	0	0	0	0	-7.32048	-7.25296	0	0	0	0	0	0	0	0	0	-8.69204	-7.04065	0	0	0	0
4	DOCK2	0	0	0	0	0	0	0	0	0	0	0	0	0	0	0	0	0	0	-7.57586	-7.4126	0	0	0	0	0	0	0	0	0	-8.29164	-7.21197	0	0	0	0
4	CD53	0	0	0	0	0	0	0	0	0	0	0	0	0	0	0	0	0	0	-7.71865	-7.43816	0	0	0	0	0	0	0	0	0	-8.55217	-7.22089	0	0	0	0
4	DOCK8	0	0	0	0	0	0	0	0	0	0	0	0	0	0	0	0	0	0	-7.26683	-7.0838	0	0	0	0	0	0	0	0	-7.19388	-8.67473	-7.12744	0	0	0	0
4	LAIR1	0	0	0	0	0	0	0	0	0	0	0	0	0	0	0	0	0	0	-7.43657	-7.2204	0	0	0	0	0	0	0	0	-7.18836	-8.97936	-7.84285	0	0	0	0
4	ELMO1	0	0	0	0	0	0	0	0	0	0	0	0	0	0	0	0	0	0	-7.16216	0	0	0	0	0	0	0	0	0	0	0	0	0	0	0	0
4	LPXN	0	0	0	0	0	0	0	0	0	0	0	0	0	0	0	0	0	0	-7.54961	0	0	0	0	0	0	0	0	0	0	0	0	0	0	0	0
4	HLA-DOA	0	0	0	0	0	0	0	0	0	0	0	0	0	0	0	0	0	0	-7.12577	0	0	0	0	0	0	0	0	0	0	0	0	0	0	0	0
4	AIM1	0	0	0	0	0	0	0	0	0	0	0	0	0	0	0	0	0	0	-7.57994	0	0	0	0	0	0	0	0	0	0	0	0	0	0	-7.16735	0
4	MDFIC	0	0	0	0	0	0	0	0	0	0	0	0	0	0	0	0	0	0	-7.22671	-7.51473	0	0	0	0	0	0	0	0	0	0	0	0	0	0	0
4	ARHGAP18	0	0	0	0	0	0	0	0	0	0	0	0	0	0	0	0	0	0	-7.47031	-7.70668	0	0	0	0	0	0	0	0	0	0	0	0	0	0	0
4	RASSF2	0	0	0	0	0	0	0	0	0	0	0	0	0	0	0	0	0	0	-7.12213	-7.50107	0	0	0	0	0	0	0	0	0	0	0	0	0	0	0
4	MAF	0	0	0	0	0	0	0	0	0	0	0	0	0	0	0	0	0	0	-7.15461	-7.50907	0	0	0	0	0	0	0	0	0	0	0	0	0	0	0
4	CDGAP	0	0	0	0	0	0	0	0	0	0	0	0	0	0	0	0	0	0	-7.5448	-8.34382	0	0	0	0	0	0	0	0	0	0	0	0	0	0	0
4	SLC19A3	0	0	0	0	0	0	0	0	0	0	0	0	0	0	0	0	0	0	-7.39496	-7.06089	0	0	0	0	0	0	0	0	0	0	0	0	0	0	0
4	TM6SF1	0	0	0	0	0	0	0	0	0	0	0	0	0	0	0	0	0	0	-7.68391	-7.39413	0	0	0	0	0	0	0	0	0	0	0	0	0	0	0
4	LRRK2	0	0	0	0	0	0	0	0	0	0	0	0	0	0	0	0	0	0	-7.9064	-7.44095	0	0	0	0	0	0	0	0	0	0	0	0	0	0	0
4	NEDD4	0	0	0	0	0	0	0	0	0	0	0	0	0	0	0	0	0	0	-7.31458	-7.20353	0	0	0	0	0	0	0	0	0	0	0	0	0	0	0
4	PAG1	0	0	0	0	0	0	0	0	0	0	0	0	0	0	0	0	0	0	-8.07879	-7.96249	0	0	0	0	0	0	0	0	0	0	0	0	0	0	0
4	AMICA1	0	0	0	0	0	0	0	0	0	0	0	0	0	0	0	0	0	0	-7.1011	-7.0237	0	0	0	0	0	0	0	0	0	0	0	0	0	0	0
4	PDE4B	0	0	0	0	0	0	0	0	0	0	0	0	0	0	0	0	0	0	-7.07128	-7.02797	0	0	0	0	0	0	0	0	0	0	0	0	0	0	0
4	MAN1A1	0	0	0	0	0	0	0	0	0	0	0	0	0	0	0	0	0	0	-8.0441	-8.03016	0	0	0	0	0	0	0	0	0	0	-7.05148	0	0	0	0
4	SLC24A3	0	0	0	0	0	0	0	0	0	0	0	0	0	0	0	0	0	0	-7.175	-7.06596	0	0	0	0	0	0	0	-7.13114	0	0	0	0	0	0	0
4	ADORA3	0	0	0	0	0	0	0	0	0	0	0	0	0	0	0	0	0	0	0	-7.16128	0	0	0	0	0	0	0	0	0	-8.00944	0	0	0	0	0
4	MSR1	0	0	0	0	0	0	0	0	0	0	0	0	0	0	0	0	0	0	0	-7.06101	0	0	0	0	0	0	0	0	0	-8.05748	0	0	0	0	0
4	GIMAP5	0	0	0	0	0	0	0	0	0	0	0	0	0	0	0	0	0	0	0	-7.13187	0	0	0	0	0	0	0	0	0	-7.75052	0	0	0	0	0
4	FCGR2B	0	0	0	0	0	0	0	0	0	0	0	0	0	0	0	0	0	0	0	-7.15932	0	0	0	0	0	0	0	0	0	-7.77068	0	0	0	0	0
4	MPEG1	0	0	0	0	0	0	0	0	0	0	0	0	0	0	0	0	0	0	0	-7.06134	0	0	0	0	0	0	0	0	0	-7.64075	0	0	0	0	0
4	FCER1G	0	0	0	0	0	0	0	0	0	0	0	0	0	0	0	0	0	0	0	-7.09493	0	0	0	0	0	0	0	0	0	-8.58548	0	0	0	0	0
4	THBD	0	0	0	0	0	0	0	0	0	0	0	0	0	0	0	0	0	0	0	-7.04738	0	0	0	0	0	0	0	0	0	0	0	0	0	0	0
4	GLIPR1	0	0	0	0	0	0	0	0	0	0	0	0	0	0	0	0	0	0	0	-7.3876	0	0	0	0	0	0	0	0	0	0	0	0	0	0	0
4	NRP1	0	0	0	0	0	0	0	0	0	0	0	0	0	0	0	0	0	0	0	-7.29936	0	0	0	0	0	0	0	0	0	0	0	0	0	0	0
4	VGLL3	0	0	0	0	0	0	0	0	0	0	0	0	0	0	0	0	0	0	0	-7.45676	0	0	0	0	0	0	0	0	0	0	0	0	0	0	0
4	PRDM1	0	0	0	0	0	0	0	0	0	0	0	0	0	0	0	0	0	0	0	-7.28521	0	0	0	0	0	0	0	0	0	0	0	0	0	0	0
4	LY96	0	0	0	0	0	0	0	0	0	0	0	0	0	0	0	0	0	0	0	-7.23454	0	0	0	0	0	0	0	0	0	0	0	0	0	0	0
4	LHFPL2	0	0	0	0	0	0	0	0	0	0	0	0	0	0	0	0	0	0	-7.62479	-7.74683	0	0	-7.03771	-7.07656	0	0	0	0	0	-8.74751	-7.74493	0	0	0	0
4	RNASE1	0	0	0	0	0	0	0	0	0	0	0	0	0	0	0	0	0	0	-8.70092	-9.17152	0	0	-7.0031	-7.5278	0	0	0	-7.09334	0	-10.4276	0	0	0	0	0
4	TMEM154	0	0	0	0	0	0	0	0	0	0	0	0	0	0	0	0	0	0	-7.71789	-7.11925	-7.97271	-8.98568	-7.93704	-7.08407	0	0	0	0	0	-8.31995	-7.34084	0	0	0	0
4	ELL2	0	0	0	0	0	0	0	0	0	0	0	0	0	0	0	0	0	0	-8.38761	-8.96796	0	-7.48511	0	-8.18379	0	0	0	0	-7.51152	-7.22288	0	0	0	0	0
4	PAPSS2	0	0	0	0	0	0	0	0	0	0	0	0	0	0	0	0	0	0	0	-7.43322	0	0	-8.41939	-7.38665	0	0	0	0	0	0	0	0	0	0	0
4	MMD	0	0	0	0	0	0	0	0	0	0	0	0	0	0	0	0	0	0	0	-7.29005	0	0	0	-9.44668	0	0	0	0	0	0	0	0	0	0	0
4	ITGB2	0	0	0	0	0	0	0	0	0	0	0	0	0	0	0	0	0	0	-8.23039	-7.7196	0	-7.61182	-7.01829	0	0	-7.44784	-7.60285	-7.17768	0	-9.30654	-7.89293	0	0	0	-7.29442
4	DPYD	0	0	0	0	0	0	0	0	0	0	0	0	0	0	0	0	0	0	-9.72885	-8.86592	-7.26856	-8.36065	-8.03713	0	0	-7.08693	-7.62195	-7.44187	0	-7.63455	-8.56575	0	0	0	-7.05569
4	ZEB2	0	0	0	0	0	0	0	0	0	0	0	0	0	0	0	0	0	0	-7.88968	-8.96317	-7.19902	-8.31552	-7.66083	-7.08908	-7.47079	-8.47237	-8.24801	-7.43565	0	-7.10107	-7.68765	0	0	0	0
4	TGFBI	0	0	0	0	0	0	0	0	0	0	0	0	0	0	0	0	0	0	-7.22698	-7.93153	0	-7.18257	-7.22696	-8.30095	0	-7.71035	0	-7.60096	0	0	-7.08362	0	0	0	0
4	DAB2	0	0	0	0	0	0	0	0	0	0	0	0	0	0	0	0	0	0	-9.14935	-9.85624	0	-7.48972	-7.18699	-7.15856	0	-8.16132	-7.47282	-7.65043	0	0	0	0	0	0	0
4	SLC9A9	0	0	0	0	0	0	0	0	0	0	0	0	0	0	0	0	0	0	-7.65892	-7.8614	0	-7.54816	0	0	-7.02238	-7.32267	-8.0741	0	0	0	0	0	0	0	0
4	MEF2C	0	0	0	0	0	0	0	0	0	0	0	0	0	0	0	0	0	0	-8.72119	-8.92544	0	-7.21485	0	0	0	0	-7.36266	0	0	0	0	0	0	0	-7.05611
5	TACC1	0	0	0	0	0	0	0	0	0	0	0	0	0	0	0	0	0	0	0	0	0	0	0	0	-7.15421	-8.82919	-10.5519	-9.38278	0	0	-7.02315	0	-8.4496	0	-7.15261
5	LRP10	0	0	0	0	0	0	0	0	0	0	0	0	0	0	0	0	0	0	0	0	0	-7.39065	0	0	-7.81585	-9.4488	-10.5677	-9.36347	0	0	0	0	-8.96654	0	-7.46343
5	FYCO1	0	0	0	0	0	0	0	0	0	0	0	0	0	0	0	0	0	0	0	0	0	0	0	0	0	-7.41385	-9.70946	-8.33943	0	0	0	0	-9.56243	0	-7.79765
5	CBX7	0	0	0	0	0	0	0	0	0	0	0	0	0	0	0	0	0	0	0	0	0	0	0	0	0	-7.33226	-9.90873	-7.11653	0	0	0	0	-9.56132	0	-8.06155
5	FBXO32	0	0	0	0	0	0	0	0	0	0	0	0	0	0	0	0	0	0	0	0	0	0	0	0	0	-8.3673	-9.7577	-8.30243	0	0	0	0	-8.26719	0	-7.11856
5	TMEM127	0	0	0	0	0	0	0	0	0	0	0	0	0	0	0	0	0	0	0	0	0	0	0	0	0	-8.22665	-8.75414	-8.62615	0	0	0	0	-7.07389	0	0
5	MACF1	0	0	0	0	0	0	0	0	0	0	0	0	0	0	0	0	0	0	0	0	0	0	0	0	0	-7.96416	-9.27137	-9.14465	0	0	0	0	-7.99975	0	0
5	PACS1	0	0	0	0	0	0	0	0	0	0	0	0	0	0	0	0	0	0	0	0	0	0	0	0	0	-7.07872	-8.75356	-7.20324	0	0	0	0	-7.05251	0	0
5	TNFSF12	0	0	0	0	0	0	0	0	0	0	0	0	0	0	0	0	0	0	0	0	0	0	0	0	0	-8.91898	-10.5475	-9.09661	0	0	0	0	-8.30376	0	0
5	PDLIM5	0	0	0	0	0	0	0	0	0	0	0	0	0	0	0	0	0	0	0	0	0	0	0	0	0	-7.74688	-9.05945	-8.1005	0	0	0	0	-7.81926	0	0
5	CAST	0	0	0	0	0	0	0	0	0	0	0	0	0	0	0	0	0	0	0	0	0	0	0	0	0	-9.30727	-9.11221	-8.35559	0	0	0	0	-7.20682	0	0
5	NUPR1	0	0	0	0	0	0	0	0	0	0	0	0	0	0	0	0	0	0	0	0	0	0	0	0	0	0	-8.6307	-7.48311	0	0	0	0	-7.38399	0	0
5	MAP3K5	0	0	0	0	0	0	0	0	0	0	0	0	0	0	0	0	0	0	0	0	0	0	0	0	0	0	-8.83539	-7.93363	0	0	0	0	-7.18321	0	0
5	CLIP1	0	0	0	0	0	0	0	0	0	0	0	0	0	0	0	0	0	0	0	0	0	0	0	0	-7.40403	0	-7.95329	-7.48574	0	0	0	0	-7.03421	0	0
5	STEAP2	0	0	0	0	0	0	0	0	0	0	0	0	0	0	0	0	0	0	0	0	0	0	0	0	0	0	-8.0083	0	0	0	0	0	-7.94549	0	0
5	AFF1	0	0	0	0	0	0	0	0	0	0	0	0	0	0	0	0	0	0	0	0	0	0	0	0	0	0	-8.26953	0	0	0	0	0	-7.46966	0	0
5	SSPN	0	0	0	0	0	0	0	0	0	0	0	0	0	0	0	0	0	0	0	0	0	0	0	0	0	0	-8.44941	0	0	0	0	0	-10.4818	0	0
5	ZBTB4	0	0	0	0	0	0	0	0	0	0	0	0	0	0	0	0	0	0	0	0	0	0	0	0	0	-7.48986	-8.16978	0	0	0	0	0	-8.66072	0	0
5	ARHGAP1	0	0	0	0	0	0	0	0	0	0	0	0	0	0	0	0	0	0	0	0	0	0	0	0	0	-7.58047	-9.81838	-9.44927	0	0	0	0	-8.62268	-8.07145	0
5	MYO1C	0	0	0	0	0	0	0	0	0	0	0	0	0	0	0	0	0	0	0	0	0	0	0	0	-7.62068	-8.64434	-10.126	-8.71127	0	0	0	0	-7.08628	-8.05518	0
5	STIM1	0	0	0	0	0	0	0	0	0	0	0	0	0	0	0	0	0	0	0	0	0	0	0	0	0	-7.19048	-9.16569	-8.91147	0	0	0	0	0	-8.592	0
5	RETSAT	0	0	0	0	0	0	0	0	0	0	0	0	0	0	0	0	0	0	0	0	0	0	0	0	0	-9.02496	-9.15135	-9.92188	0	0	0	0	0	-10.1671	0
5	GAL3ST4	0	0	0	0	0	0	0	0	0	0	0	0	0	0	0	0	0	0	0	0	0	0	0	0	0	-7.2145	-7.16515	-7.02905	0	0	0	0	0	0	0
5	GALNT10	0	0	0	0	0	0	0	0	0	0	0	0	0	0	0	0	0	0	0	0	0	0	0	0	0	-7.31335	-7.5521	-7.33305	0	0	0	0	0	0	0
5	FAM102A	0	0	0	0	0	0	0	0	0	0	0	0	0	0	0	0	0	0	0	0	0	0	0	0	0	-8.03393	-8.3669	-8.41137	0	0	0	0	0	0	0
5	ACTN1	0	0	0	0	0	0	0	0	0	0	0	0	0	0	0	0	0	0	0	0	0	0	0	0	0	-7.81503	-8.13888	-8.46836	0	0	0	0	0	0	0
5	MTF1	0	0	0	0	0	0	0	0	0	0	0	0	0	0	0	0	0	0	0	0	0	0	0	0	0	-7.10729	-8.60505	-7.71611	0	0	0	0	0	0	0
5	PODNL1	0	0	0	0	0	0	0	0	0	0	0	0	0	0	0	0	0	0	0	0	0	0	0	0	0	-8.07397	-7.12116	-8.43398	0	0	0	0	0	0	0
5	TTC7A	0	0	0	0	0	0	0	0	0	0	0	0	0	0	0	0	0	0	0	0	0	0	0	0	0	-8.19622	-8.08175	-7.32444	0	0	0	0	0	0	0
5	FAM114A1	0	0	0	0	0	0	0	0	0	0	0	0	0	0	0	0	0	0	0	0	0	0	0	0	0	-8.88329	-9.0228	-7.71056	0	0	0	0	0	0	0
5	ACTB	0	0	0	0	0	0	0	0	0	0	0	0	0	0	0	0	0	0	0	0	0	0	0	0	0	-8.40174	-7.78667	-7.5118	0	0	0	0	0	0	0
5	TOM1	0	0	0	0	0	0	0	0	0	0	0	0	0	0	0	0	0	0	0	0	0	0	0	0	0	-8.60679	-8.05569	-7.96546	0	0	0	0	0	0	0
5	MYH9	0	0	0	0	0	0	0	0	0	0	0	0	0	0	0	0	0	0	0	0	0	0	0	0	0	-8.39869	-7.54127	-7.30493	0	0	0	0	0	0	0
5	LCE1A	0	0	0	0	0	0	0	0	0	0	0	0	0	0	0	0	0	0	0	0	0	0	0	0	0	-7.13855	-7.45427	0	0	0	0	0	0	0	0
5	MFSD1	0	0	0	0	0	0	0	0	0	0	0	0	0	0	0	0	0	0	0	0	0	0	0	0	0	-7.35464	-7.67479	0	0	0	0	0	0	0	0
5	RNPEPL1	0	0	0	0	0	0	0	0	0	0	0	0	0	0	0	0	0	0	0	0	0	0	0	0	0	-7.27693	-7.56167	0	0	0	0	0	0	0	0
5	NEXN	0	0	0	0	0	0	0	0	0	0	0	0	0	0	0	0	0	0	0	0	0	0	0	0	0	-7.28375	-7.18839	0	0	0	0	0	0	0	0
5	EPAS1	0	0	0	0	0	0	0	0	0	0	0	0	0	0	0	0	0	0	0	0	0	-7.61267	0	0	0	-7.61248	-8.01847	-7.24658	0	0	0	0	0	0	0
5	TNFRSF1A	0	0	0	0	0	0	0	0	0	0	0	0	0	0	0	0	0	0	0	0	0	-7.41666	0	0	0	-8.20387	-8.54924	-8.06013	0	0	0	0	-7.05833	0	0
5	SLC46A2	0	0	0	0	0	0	0	0	0	0	0	0	0	0	0	0	0	0	0	0	0	-7.29432	0	0	0	0	-7.27736	-7.30961	0	0	0	0	0	0	0
5	PTPRE	0	0	0	0	0	0	0	0	0	0	0	0	0	0	0	0	0	0	0	0	0	-7.49168	0	0	0	0	-7.832	-7.11479	0	0	0	0	0	0	0
5	PRKCH	0	0	0	0	0	0	0	0	0	0	0	0	0	0	0	0	0	0	0	0	0	-7.17526	0	0	0	0	-7.11267	0	0	0	0	0	0	0	0
5	LEPROT	0	0	0	0	0	0	0	0	0	0	0	0	0	0	0	0	0	0	0	0	0	-8.47123	0	0	0	0	-7.97935	0	0	0	0	0	-7.15293	0	0
5	HTRA1	0	0	0	0	0	0	0	0	0	0	0	0	0	0	0	0	0	0	0	0	-7.32349	-7.80469	0	0	0	-7.22311	-7.77416	0	0	0	0	0	0	0	0
5	KLF2	0	0	0	0	0	0	0	0	0	0	0	0	0	0	0	0	0	0	0	0	-7.85028	-7.50404	0	0	0	-7.95493	-8.33881	-7.43864	0	0	0	0	0	0	0
5	TGFBR2	0	0	0	0	0	0	0	0	0	0	0	0	0	0	0	0	0	0	0	0	-7.82125	-7.29856	0	0	0	0	-7.76793	0	0	0	0	0	0	0	0
5	EHD2	0	0	0	0	0	0	0	0	0	0	0	0	0	0	0	0	0	0	0	0	-7.30838	-7.16476	0	0	0	0	-7.88894	0	0	0	0	0	0	0	0
5	BACE1	0	0	0	0	0	0	0	0	0	0	0	0	0	0	0	0	0	0	0	0	0	0	0	0	0	0	0	-7.67298	0	0	0	0	0	0	0
5	CD82	0	0	0	0	0	0	0	0	0	0	0	0	0	0	0	0	0	0	0	0	0	0	0	0	0	0	0	-7.71848	0	0	0	0	0	0	0
5	FAM49A	0	0	0	0	0	0	0	0	0	0	0	0	0	0	0	0	0	0	0	0	0	0	0	0	0	0	0	-7.06372	0	0	0	0	0	0	0
5	ABCA1	0	0	0	0	0	0	0	0	0	0	0	0	0	0	0	0	0	0	0	0	0	0	0	0	0	0	0	-7.20136	0	0	0	0	0	0	0
5	GPR56	0	0	0	0	0	0	0	0	0	0	0	0	0	0	0	0	0	0	0	0	0	0	0	0	0	0	0	-7.30915	0	0	0	0	0	0	0
5	RAB11FIP1	0	0	0	0	0	0	0	0	0	0	0	0	0	0	0	0	0	0	0	0	0	0	0	0	0	0	0	-7.63599	0	0	0	0	0	0	0
5	RUNX2	0	0	0	0	0	0	0	0	0	0	0	0	0	0	0	-7.10127	0	0	0	0	0	0	0	0	0	0	0	-7.0452	0	0	0	0	0	0	0
5	FAM129B	0	0	0	0	0	0	0	0	0	0	0	0	0	0	0	0	0	0	0	0	0	0	0	0	0	0	-7.06996	-7.64082	0	0	0	0	0	0	0
5	SIL1	0	0	0	0	0	0	0	0	0	0	0	0	0	0	0	0	0	0	0	0	0	0	0	0	0	0	-7.59073	-8.29093	0	0	0	0	0	0	0
5	CCBP2	0	0	0	0	0	0	0	0	0	0	0	0	0	0	0	0	0	0	0	0	0	0	0	0	0	0	-7.00206	-7.98409	0	0	0	0	0	0	0
5	NINJ1	0	0	0	0	0	0	0	0	0	0	0	0	0	0	0	0	0	0	0	0	0	0	0	0	0	0	-7.41144	-7.70287	0	0	0	0	0	0	0
5	REEP5	0	0	0	0	0	0	0	0	0	0	0	0	0	0	0	0	0	0	0	0	0	0	0	0	0	0	-7.63951	-8.00785	0	0	0	0	0	0	0
5	DIRC2	0	0	0	0	0	0	0	0	0	0	0	0	0	0	0	0	0	0	0	0	0	0	0	0	0	0	-7.11379	-7.5225	0	0	0	0	0	0	0
5	SPRYD3	0	0	0	0	0	0	0	0	0	0	0	0	0	0	0	0	0	0	0	0	0	0	0	0	0	0	-7.44141	-7.90865	0	0	0	0	0	0	0
5	SYTL2	0	0	0	0	0	0	0	0	0	0	0	0	0	0	0	0	0	0	0	0	0	0	0	0	0	0	-7.29014	-7.46524	0	0	0	0	0	0	0
5	RAB2A	0	0	0	0	0	0	0	0	0	0	0	0	0	0	0	0	0	0	0	0	0	0	0	0	0	0	-7.481	-7.61241	0	0	0	0	0	0	0
5	STOM	0	0	0	0	0	0	0	0	0	0	0	0	0	0	0	0	0	0	0	0	0	0	0	0	0	0	-7.20249	-7.0977	0	0	0	0	0	0	0
5	CLTB	0	0	0	0	0	0	0	0	0	0	0	0	0	0	0	0	0	0	0	0	0	0	0	0	0	0	-7.62058	-7.54765	0	0	0	0	0	0	0
5	STBD1	0	0	0	0	0	0	0	0	0	0	0	0	0	0	0	0	0	0	0	0	0	0	0	0	0	0	-7.29064	-7.30532	0	0	0	0	0	0	0
5	MAN2A1	0	0	0	0	0	0	0	0	0	0	0	0	0	0	0	0	0	0	0	0	0	0	0	0	0	0	-7.77993	-7.53909	0	0	0	0	0	0	0
5	RAB43	0	0	0	0	0	0	0	0	0	0	0	0	0	0	0	0	0	0	0	0	0	0	0	0	0	0	-8.08413	-7.34247	0	0	0	0	0	0	0
5	ST6GALNAC6	0	0	0	0	0	0	0	0	0	0	0	0	0	0	0	0	0	0	0	0	0	0	0	0	0	0	-8.23752	0	0	0	0	0	0	0	0
5	ATXN1	0	0	0	0	0	0	0	0	0	0	0	0	0	0	0	0	0	0	0	0	0	0	0	0	0	0	-8.24511	0	0	0	0	0	0	0	0
5	MT2A	0	0	0	0	0	0	0	0	0	0	0	0	0	0	0	0	0	0	0	0	0	0	0	0	0	0	-7.69625	0	0	0	0	0	0	0	0
5	JAK1	0	0	0	0	0	0	0	0	0	0	0	0	0	0	0	0	0	0	0	0	0	0	0	0	0	0	-7.66596	0	0	0	0	0	0	0	0
5	ADCY9	0	0	0	0	0	0	0	0	0	0	0	0	0	0	0	0	0	0	0	0	0	0	0	0	0	0	-7.45536	0	0	0	0	0	0	0	0
5	SWAP70	0	0	0	0	0	0	0	0	0	0	0	0	0	0	0	0	0	0	0	0	0	0	0	0	0	0	-7.50884	0	0	0	0	0	0	0	0
5	WDR81	0	0	0	0	0	0	0	0	0	0	0	0	0	0	0	0	0	0	0	0	0	0	0	0	0	0	-7.50225	0	0	0	0	0	0	0	0
5	CEBPD	0	0	0	0	0	0	0	0	0	0	0	0	0	0	0	0	0	0	0	0	0	0	0	0	0	0	-7.46894	0	0	0	0	0	0	0	0
5	GBP3	0	0	0	0	0	0	0	0	0	0	0	0	0	0	0	0	0	0	0	0	0	0	0	0	0	0	-7.38938	0	0	0	0	0	0	0	0
5	TRIM38	0	0	0	0	0	0	0	0	0	0	0	0	0	0	0	0	0	0	0	0	0	0	0	0	0	0	-7.38767	0	0	0	0	0	0	0	0
5	TRAK2	0	0	0	0	0	0	0	0	0	0	0	0	0	0	0	0	0	0	0	0	0	0	0	0	0	0	-7.28801	0	0	0	0	0	0	0	0
5	RGL1	0	0	0	0	0	0	0	0	0	0	0	0	0	0	0	0	0	0	0	0	0	0	0	0	0	0	-7.25599	0	0	0	0	0	0	0	0
5	MT1B	0	0	0	0	0	0	0	0	0	0	0	0	0	0	0	0	0	0	0	0	0	0	0	0	0	0	-7.21206	0	0	0	0	0	0	0	0
5	PCDH7	0	0	0	0	0	0	0	0	0	0	0	0	0	0	0	0	0	0	0	0	0	0	0	0	0	0	-7.00846	0	0	0	0	0	0	0	0
5	CYLD	0	0	0	0	0	0	0	0	0	0	0	0	0	0	0	0	0	0	0	0	0	0	0	0	0	0	-7.09313	0	0	0	0	0	0	0	0
5	GIMAP8	0	0	0	0	0	0	0	0	0	0	0	0	0	0	0	0	0	0	0	0	0	0	0	0	0	0	-7.21643	0	0	0	0	0	0	0	0
5	PPM1M	0	0	0	0	0	0	0	0	0	0	0	0	0	0	0	0	0	0	0	0	0	0	0	0	0	0	-7.38467	0	0	0	0	0	0	0	0
5	LITAF	0	0	0	0	0	0	0	0	0	0	0	0	0	0	0	0	0	0	0	0	0	0	0	0	0	0	-7.46593	0	0	0	0	0	0	0	0
5	ENDOD1	0	0	0	0	0	0	0	0	0	0	0	0	0	0	0	0	0	0	0	0	0	0	0	0	0	0	-7.13223	0	0	0	0	0	0	0	0
5	A2M	0	0	0	0	0	0	0	0	0	0	0	0	0	0	0	0	0	0	0	0	0	0	0	0	0	0	-8.2179	0	0	0	0	0	0	0	0
5	PTGIS	0	0	0	0	0	0	0	0	0	0	0	0	0	0	0	0	0	0	0	0	0	0	-8.25964	0	0	0	0	0	0	0	0	0	0	0	0
5	SESTD1	0	0	0	0	0	0	0	0	0	0	0	0	0	0	0	0	0	0	0	0	0	0	-7.6563	0	0	0	0	0	0	0	0	0	0	0	0
5	KCND2	0	0	0	0	0	0	0	0	0	0	0	0	0	0	0	0	0	0	0	0	0	0	-7.94336	0	0	0	0	0	0	0	0	0	0	0	0
5	ETV1	0	0	0	0	0	0	0	0	0	0	0	0	0	0	0	0	0	0	0	0	0	0	-7.41158	0	0	0	0	0	0	0	0	0	0	0	0
5	FAS	0	0	0	0	0	0	0	0	0	0	0	0	0	0	0	0	0	0	0	0	0	0	-7.14119	0	0	0	0	0	0	0	0	0	0	0	0
5	CYB5R4	0	0	0	0	0	0	0	0	0	0	0	0	0	0	0	0	0	0	0	0	0	0	-7.99693	0	0	0	0	0	-8.08826	0	0	0	0	0	0
5	ITGAV	0	0	0	0	0	0	0	0	0	0	0	0	0	0	0	0	0	0	0	0	0	0	0	0	0	-7.30476	0	0	0	0	0	0	0	0	0
5	CAP1	0	0	0	0	0	0	0	0	0	0	0	0	0	0	0	0	0	0	0	0	0	0	0	0	0	-7.2406	0	0	0	0	0	0	0	0	0
5	WDR1	0	0	0	0	0	0	0	0	0	0	0	0	0	0	0	0	0	0	0	0	0	0	0	0	0	-7.22906	0	0	0	0	0	0	0	0	0
5	RPS6KA4	0	0	0	0	0	0	0	0	0	0	0	0	0	0	0	0	0	0	0	0	0	0	0	0	0	-7.04044	0	0	0	0	0	0	0	0	0
5	ELOVL1	0	0	0	0	0	0	0	0	0	0	0	0	0	0	0	0	0	0	0	0	0	0	0	0	0	-7.21583	0	0	0	0	0	0	0	0	0
5	SH3BGRL3	0	0	0	0	0	0	0	0	0	0	0	0	0	0	0	0	0	0	0	0	0	0	0	0	0	-7.1624	0	0	0	0	0	0	0	0	0
5	SFRP4	0	0	0	0	0	0	0	0	0	0	0	0	0	0	0	0	0	0	0	0	0	0	-7.18331	0	0	-7.34349	0	0	0	0	0	0	0	0	0
5	CLEC2B	0	0	0	0	0	0	0	0	0	0	0	0	0	0	0	-7.74463	0	-7.08479	0	-7.73534	0	-7.94174	-7.56045	-7.37709	-7.38382	-8.24119	-7.89903	-7.60864	0	0	-7.50917	0	0	0	0
5	NNMT	0	0	0	0	0	0	0	0	0	0	0	0	0	0	0	-8.48536	0	-7.72274	0	-7.01517	-7.2685	-9.1358	0	0	0	-9.36572	-9.52769	-9.10083	0	0	-7.83823	0	0	0	0
5	WIPF1	0	0	0	0	0	0	0	0	0	0	0	0	0	0	0	-7.79866	0	-7.1803	0	0	0	0	0	0	-7.24365	0	-7.12305	0	0	0	-7.17282	0	0	0	0
5	KIAA0513	0	0	0	0	0	0	0	0	0	0	0	0	0	0	0	0	0	0	0	0	-7.34198	-8.0279	-7.79151	0	-8.22309	-7.15046	-8.58181	-7.37633	0	0	-7.54045	0	0	0	0
5	ACSL1	0	0	0	0	0	0	0	0	0	0	0	0	0	0	0	0	0	0	0	0	-7.62725	-7.48293	-7.49364	-8.4479	-7.8981	-7.40028	-7.37372	-7.99873	0	0	0	0	0	0	0
5	GPNMB	0	0	0	0	0	0	0	0	0	0	0	0	0	0	0	0	0	0	0	0	0	0	-7.30838	-7.02626	-7.1115	-8.06779	-7.78911	-9.07588	0	0	-8.60736	0	0	0	0
5	RAB31	0	0	0	0	0	0	0	0	0	0	0	0	0	0	0	0	0	0	0	0	0	-7.13949	-7.23344	-7.77938	-8.08641	-9.73245	-9.35113	-9.55921	0	0	-7.29558	0	0	0	0
5	FAM20A	0	0	0	0	0	0	0	0	0	0	0	0	0	0	0	0	0	0	0	0	0	0	0	0	-7.52843	-7.30907	-8.2221	-7.38874	0	0	-7.05286	0	0	0	-7.36134
5	ZNFX1	0	0	0	0	0	0	0	0	0	0	0	0	0	0	0	0	0	0	0	0	0	0	0	0	-7.2279	-7.40734	-9.33554	-8.14085	0	0	-7.34781	0	0	0	-7.11109
5	MICAL2	0	0	0	0	0	0	0	0	0	0	0	0	0	0	0	-7.5638	0	0	0	0	0	0	0	0	-7.7359	-8.37235	-7.86901	-8.70481	0	0	-7.34365	0	0	0	0
5	HSPB1	0	0	0	0	0	0	0	0	0	0	0	0	0	0	0	0	0	0	0	0	0	0	0	0	0	0	-7.11662	-7.68802	0	0	-7.43102	0	0	0	0
5	STAT3	0	0	0	0	0	0	0	0	0	0	0	0	0	0	0	0	0	0	0	0	0	0	0	0	0	-8.71636	-8.95079	-7.77547	0	0	-7.22313	0	0	0	0
5	CTSD	0	0	0	0	0	0	0	0	0	0	0	0	0	0	0	0	0	0	0	0	0	0	0	0	0	-8.83268	-7.81657	-8.7744	0	0	-7.94665	0	0	-8.17082	-7.41837
5	ARPC1B	0	0	0	0	0	0	0	0	0	0	0	0	0	0	0	0	0	0	0	0	0	0	0	0	-7.93305	-9.66973	-9.65322	-8.98583	0	0	-7.88661	0	0	-7.36373	-7.86727
5	APOL2	0	0	0	0	0	0	0	0	0	0	0	0	0	0	0	0	0	0	0	0	0	0	0	0	0	0	-7.00874	-7.23565	0	0	-8.42939	0	0	-8.64501	-7.83327
5	SLC16A3	0	0	0	0	0	0	0	0	0	0	0	0	0	0	0	0	0	0	0	0	0	0	0	0	0	-7.83611	0	-7.18022	0	0	-7.73678	0	0	0	0
5	SPSB1	0	0	0	0	0	0	0	0	0	0	0	0	0	0	0	0	0	0	0	0	0	0	0	0	0	-7.44911	0	-7.19009	0	0	-8.55888	0	0	0	0
5	LIMA1	0	0	0	0	0	0	0	0	0	0	0	0	0	0	0	0	0	0	0	0	0	0	0	-7.67504	-7.41	0	0	-7.37255	0	0	0	0	0	0	0
5	P4HA2	0	0	0	0	0	0	0	0	0	0	0	0	0	0	0	0	0	0	0	0	0	0	0	-8.32806	-7.45883	-7.14416	0	-7.48829	0	0	0	0	0	0	0
5	SNX9	0	0	0	0	0	0	0	0	0	0	0	0	0	0	0	0	0	0	0	0	0	0	0	0	-7.05823	0	0	-7.96127	0	0	0	0	0	0	0
5	CPEB4	0	0	0	0	0	0	0	0	0	0	0	0	0	0	0	0	0	0	0	0	0	0	0	0	-7.61952	-7.7805	-7.29131	-7.24444	0	0	0	0	0	0	0
5	TMEM2	0	0	0	0	0	0	0	0	0	0	0	0	0	0	0	0	0	0	0	0	0	0	0	0	-7.57339	-7.85644	-7.1959	-8.0229	0	0	0	0	0	0	0
5	TGFB1	0	0	0	0	0	0	0	0	0	0	0	0	0	0	0	0	0	0	0	0	0	0	0	0	-7.23285	-8.43611	-8.39319	-7.59968	0	0	0	0	0	0	0
5	REEP3	0	0	0	0	0	0	0	0	0	0	0	0	0	0	0	0	0	0	0	0	0	0	0	0	-9.25866	-7.49681	-7.84142	-8.56816	0	0	0	0	0	0	0
5	ATP6V0E1	0	0	0	0	0	0	0	0	0	0	0	0	0	0	0	0	0	0	0	0	0	0	0	0	-7.33047	-7.37965	-8.3627	-8.38394	0	0	0	0	0	0	0
5	EEA1	0	0	0	0	0	0	0	0	0	0	0	0	0	0	0	0	0	0	0	0	0	0	0	0	-8.09617	-7.39082	-9.00483	-8.89602	0	0	0	0	0	0	0
5	FKBP15	0	0	0	0	0	0	0	0	0	0	0	0	0	0	0	0	0	0	0	0	0	0	0	0	-8.0851	-7.85403	-9.31251	-8.43553	0	0	0	0	0	0	0
5	GRN	0	0	0	0	0	0	0	0	0	0	0	0	0	0	0	0	0	0	0	0	0	0	0	0	-7.11761	-7.29978	0	0	0	0	0	0	0	0	0
5	DUSP3	0	0	0	0	0	0	0	0	0	0	0	0	0	0	0	0	0	0	0	0	0	0	0	0	-7.3065	-7.2767	0	0	-7.13807	0	0	0	0	0	0
5	PIP4K2A	0	0	0	0	0	0	0	0	0	0	0	0	0	0	0	0	0	0	0	0	0	0	0	0	-7.10113	0	0	0	0	0	0	0	0	0	0
5	SESN2	0	0	0	0	0	0	0	0	0	0	0	0	0	0	0	0	0	0	0	0	0	0	0	0	-7.19841	0	0	0	0	0	0	0	0	0	0
5	CYP1B1	0	0	0	0	0	0	0	0	0	0	0	0	0	0	0	0	0	0	0	0	0	0	0	0	-7.08031	0	0	0	0	0	0	0	0	0	0
5	GNS	0	0	0	0	0	0	0	0	0	0	0	0	0	0	0	0	0	0	0	0	0	0	0	0	-7.3564	0	0	0	0	0	0	0	0	0	0
5	BLVRA	0	0	0	0	0	0	0	0	0	0	0	0	0	0	0	0	0	0	0	0	0	0	0	0	-7.01594	0	0	0	0	0	0	0	0	0	0
5	MAP3K2	0	0	0	0	0	0	0	0	0	0	0	0	0	0	0	0	0	0	0	0	0	0	0	0	-7.14788	0	-7.73713	0	0	0	0	0	0	0	0
5	JAZF1	0	0	0	0	0	0	0	0	0	0	0	0	0	0	0	0	0	0	0	0	0	0	0	0	-7.63263	0	-8.03316	0	0	0	0	0	0	0	0
5	FAM129A	0	0	0	0	0	0	0	0	0	0	0	0	0	0	0	0	0	0	0	0	0	0	0	0	-7.10161	0	-8.2726	0	0	0	0	0	0	0	0
5	TEP1	0	0	0	0	0	0	0	0	0	0	0	0	0	0	0	0	0	0	0	0	0	0	0	0	-7.05947	-7.11663	-8.59408	0	0	0	0	0	0	0	0
5	OGFRL1	0	0	0	0	0	0	0	0	0	0	0	0	0	0	0	0	0	0	0	0	0	0	0	0	-7.09094	0	-7.36596	0	-7.23735	0	0	0	0	0	0
5	TLR6	0	0	0	0	0	0	0	0	0	0	0	0	0	0	0	0	0	0	0	0	0	0	0	0	0	0	-7.2975	0	0	-7.66037	0	0	0	0	0
5	ATP8B4	0	0	0	0	0	0	0	0	0	0	0	0	0	0	0	0	0	0	0	0	0	0	0	0	0	0	-7.04209	0	0	-7.7178	0	0	0	0	0
5	TNFAIP8L2	0	0	0	0	0	0	0	0	0	0	0	0	0	0	0	0	0	0	0	0	0	0	0	0	0	0	-7.14337	0	0	-8.67585	0	0	0	0	0
5	LAT2	0	0	0	0	0	0	0	0	0	0	0	0	0	0	0	0	0	0	0	0	0	0	0	0	0	0	-7.42974	0	0	-8.3111	0	0	0	0	-7.04189
5	APBB1IP	0	0	0	0	0	0	0	0	0	0	0	0	0	0	0	0	0	0	0	0	0	0	0	0	0	-7.45672	-7.9274	0	0	-8.86616	0	0	0	0	0
5	C3	0	0	0	0	0	0	0	0	0	0	0	0	0	0	0	0	0	0	0	0	0	0	0	0	0	-8.05087	-9.21865	0	0	-7.79529	0	0	0	0	-7.92709
5	RGS1	0	0	0	0	0	0	0	0	0	0	0	0	0	0	0	0	0	0	0	0	0	0	0	0	0	-7.1217	0	0	0	-8.46424	0	0	0	0	0
5	TYROBP	0	0	0	0	0	0	0	0	0	0	0	0	0	0	0	0	0	0	0	0	0	0	0	0	0	-7.14482	0	0	0	-8.49737	0	0	0	0	0
5	CLEC5A	0	0	0	0	0	0	0	0	0	0	0	0	0	0	0	0	0	0	0	0	0	0	0	0	0	-7.42563	0	0	0	-8.37131	0	0	0	0	0
5	TREM2	0	0	0	0	0	0	0	0	0	0	0	0	0	0	0	0	0	0	0	0	0	0	0	0	0	-7.43833	0	0	0	-7.75432	0	0	0	0	0
5	EDEM1	0	0	0	0	0	0	0	0	0	0	0	0	0	0	0	0	0	0	0	0	0	0	0	0	-7.05471	-7.67068	-7.64228	-7.57231	0	-8.07317	0	0	0	0	0
5	P2RX7	0	0	0	0	0	0	0	0	0	0	0	0	0	0	0	0	0	0	0	0	0	0	0	0	-7.07684	-7.95273	-9.63692	-7.68372	0	-7.36393	0	0	-7.55007	0	0
5	P2RY6	0	0	0	0	0	0	0	0	0	0	0	0	0	0	0	0	0	0	0	0	0	-7.38965	0	0	-7.05958	-7.21889	-8.17686	-8.20436	0	-7.24888	0	0	0	0	0
5	STK10	0	0	0	0	0	0	0	0	0	0	0	0	0	0	0	0	0	0	0	0	0	0	0	0	-7.07344	-7.84479	-7.67522	-7.40988	0	-8.07917	-7.91663	0	0	0	0
5	VAV1	0	0	0	0	0	0	0	0	0	0	0	0	0	0	0	0	0	0	0	0	0	0	0	0	-7.29427	-7.42873	-8.12184	-7.81617	0	-8.80007	-7.61531	0	0	0	0
5	RABGAP1L	0	0	0	0	0	0	0	0	0	0	0	0	0	0	0	0	0	0	0	0	0	0	0	0	-8.34441	-7.88211	-8.27995	-7.56358	0	-7.07101	-7.29957	0	0	0	0
5	CTSA	0	0	0	0	0	0	0	0	0	0	0	0	0	0	0	0	0	0	0	0	0	0	0	0	-9.95528	-10.6603	-10.8873	-10.0531	-7.17883	-7.82582	-8.07164	0	0	0	0
5	TCIRG1	0	0	0	0	0	0	0	0	0	0	0	0	0	0	0	0	0	0	0	0	0	0	0	0	0	-7.69986	-7.96861	-7.59013	0	-8.82122	-7.4002	0	0	0	0
5	CCR1	0	0	0	0	0	0	0	0	0	0	0	0	0	0	0	0	0	0	0	0	0	0	0	0	0	-7.18053	-7.68766	-7.82132	0	-9.04682	-7.55579	0	0	0	0
5	FCGR1A	0	0	0	0	0	0	0	0	0	0	0	0	0	0	0	0	0	0	0	0	0	0	0	0	0	-7.15406	-7.48897	-7.64214	0	-8.16376	-7.02459	0	0	0	0
5	TMEM140	0	0	0	0	0	0	0	0	0	0	0	0	0	0	0	0	0	0	0	0	0	0	0	0	0	-7.39459	-8.11769	-8.01931	0	-8.41108	-7.83446	0	0	0	0
5	CSF1	0	0	0	0	0	0	0	0	0	0	0	0	0	0	0	0	0	0	0	0	0	0	0	0	0	-7.30188	-7.92284	-7.62115	0	-9.85985	-7.0812	0	0	0	0
5	IQGAP1	0	0	0	0	0	0	0	0	0	0	0	0	0	0	0	0	0	0	0	0	0	0	0	0	0	-8.91111	-9.38174	-9.34957	0	-7.35665	-8.73412	0	0	0	0
5	TPST2	0	0	0	0	0	0	0	0	0	0	0	0	0	0	0	0	0	0	0	0	0	0	0	0	0	-8.87543	-9.20093	-9.6647	0	-7.4784	-8.07094	0	0	0	0
5	MYO5A	0	0	0	0	0	0	0	0	0	0	0	0	0	0	0	0	0	0	-7.13309	0	0	0	0	0	0	-9.37707	-9.75174	-9.8826	0	-8.80025	-8.2184	0	0	-7.05813	0
5	RNF19B	0	0	0	0	0	0	0	0	0	0	0	0	0	0	0	0	0	0	0	0	0	0	0	0	0	0	-7.01751	-7.078	0	-7.89598	0	0	0	0	0
5	TTC9	0	0	0	0	0	0	0	0	0	0	0	0	0	0	0	0	0	0	0	0	0	0	0	0	0	0	-8.2285	-8.04586	0	-7.23854	0	0	0	0	0
5	KIAA0494	0	0	0	0	0	0	0	0	0	0	0	0	0	0	0	0	0	0	0	0	0	0	0	0	-7.19325	0	-8.8035	-7.95136	0	-7.4703	0	0	0	0	0
5	TMEM50A	0	0	0	0	0	0	0	0	0	0	0	0	0	0	0	0	0	0	0	0	0	0	0	0	0	0	-7.46682	-7.49703	-8.47847	-7.04307	0	0	0	0	0
5	CD14	0	0	0	0	0	0	0	0	0	0	0	0	0	0	0	0	0	0	0	0	0	0	0	0	0	-7.35695	-7.27131	-7.15293	0	-7.88157	0	0	0	0	0
5	STAB1	0	0	0	0	0	0	0	0	0	0	0	0	0	0	0	0	0	0	0	0	0	0	0	0	0	-7.31783	-7.54847	-7.19065	0	-8.24615	0	0	0	0	0
5	PQLC3	0	0	0	0	0	0	0	0	0	0	0	0	0	0	0	0	0	0	0	0	0	0	0	0	0	-7.32529	-8.056	-7.32001	0	-7.95474	0	0	0	0	0
5	CTSZ	0	0	0	0	0	0	0	0	0	0	0	0	0	0	0	0	0	0	0	0	0	0	0	0	0	-7.05626	-7.50238	-8.02182	0	-7.42771	0	0	0	0	0
5	TAOK3	0	0	0	0	0	0	0	0	0	0	0	0	0	0	0	0	0	0	0	0	0	0	0	0	0	-8.04908	-8.7144	-9.33376	0	-8.16166	0	0	0	0	0
5	IGSF21	0	0	0	0	0	0	0	0	0	0	0	0	0	0	0	0	0	0	0	0	0	0	0	0	0	-7.26132	-7.59255	-7.71268	0	-7.11828	0	0	0	0	0
5	FCGR3A	0	0	0	0	0	0	0	0	0	0	0	0	0	0	0	0	0	0	0	0	0	0	0	0	0	0	0	-7.26711	0	-7.20687	0	0	0	0	0
5	C1QC	0	0	0	0	0	0	0	0	0	0	0	0	0	0	0	0	0	0	0	0	0	0	0	0	0	0	0	-7.31614	0	-7.46034	0	0	0	0	0
5	PVRL4	0	0	0	0	0	0	0	0	0	0	0	0	0	0	0	0	0	0	0	0	0	0	0	0	0	-7.30346	0	-8.08735	0	-8.74315	0	0	0	0	0
5	SLCO2B1	0	0	0	0	0	0	0	0	0	0	0	0	0	0	0	0	0	0	-7.42472	-7.32944	0	0	0	0	0	-7.43606	-7.3894	0	0	-8.01881	0	0	0	0	0
5	EVI2B	0	0	0	0	0	0	0	0	0	0	0	0	0	0	0	0	0	0	-7.68684	-7.61283	0	0	0	0	0	-7.7262	-7.63555	0	0	-8.97359	-7.51083	0	0	0	0
5	ITGAM	0	0	0	0	0	0	0	0	0	0	0	0	0	0	0	0	0	0	0	-7.01146	0	0	0	0	0	-7.61345	-7.35934	0	0	-9.62879	-7.62183	0	0	0	0
5	ABI3	0	0	0	0	0	0	0	0	0	0	0	0	0	0	0	0	0	0	-7.01252	0	0	0	0	0	0	-7.12144	-7.59848	0	0	-8.93253	-7.41483	0	0	0	0
5	NCKAP1L	0	0	0	0	0	0	0	0	0	0	0	0	0	0	0	0	0	0	-7.02002	0	0	0	0	0	0	-7.56155	-7.47435	0	0	-9.50266	-7.90106	0	0	0	0
5	LCP2	0	0	0	0	0	0	0	0	0	0	0	0	0	0	0	0	0	0	-7.27061	0	0	0	0	0	0	-7.04941	-7.16895	0	-7.24254	-9.53035	-7.97979	0	0	0	0
5	SH2B3	0	0	0	0	0	0	0	0	0	0	0	0	0	0	0	0	0	0	-7.04926	0	0	0	0	0	-7.69318	-7.513	-8.04114	-7.2162	0	-7.95462	-7.27557	0	0	0	0
5	ARHGAP9	0	0	0	0	0	0	0	0	0	0	0	0	0	0	0	0	0	0	-7.5021	-7.20122	0	0	0	0	-7.4979	-7.59972	-7.78312	-7.03936	0	-8.74142	-7.99114	0	0	0	0
5	IL10RA	0	0	0	0	0	0	0	0	0	0	0	0	0	0	0	0	0	0	-7.30178	-7.28401	0	0	0	0	-7.09563	-7.54567	-7.76799	0	0	-8.60923	-7.74023	0	0	0	0
5	FAM78A	0	0	0	0	0	0	0	0	0	0	0	0	0	0	0	0	0	0	-7.75343	-7.77992	0	0	0	0	-7.28084	-7.31484	-7.44494	0	0	-8.61185	-7.3114	0	0	0	0
5	FYB	0	0	0	0	0	0	0	0	0	0	0	0	0	0	0	0	0	0	-7.51191	-7.44216	0	0	0	0	0	-7.4156	-7.7394	-7.32515	0	-9.29792	-7.99829	0	0	0	0
5	LAPTM5	0	0	0	0	0	0	0	0	0	0	0	0	0	0	0	0	0	0	-7.23503	-7.174	0	0	0	0	0	-7.38764	-7.3168	-7.59228	0	-9.34068	-7.6309	0	0	0	0
5	SLC37A2	0	0	0	0	0	0	0	0	0	0	0	0	0	0	0	0	0	0	-7.51045	-7.47173	0	0	0	0	0	-8.01958	-7.14295	-7.52272	0	-10.694	-8.63364	0	0	0	0
5	FCGR2A	0	0	0	0	0	0	0	0	0	0	0	0	0	0	0	0	0	0	-7.17263	-7.51612	0	0	0	0	0	-7.80679	-7.5398	-7.66546	0	-7.6552	-7.07336	0	0	0	0
5	NAGA	0	0	0	0	0	0	0	0	0	0	0	0	0	0	0	0	0	0	-7.25755	-7.40098	0	0	0	0	0	-8.3737	-7.45027	-7.98417	0	-7.78138	-7.3507	0	0	0	0
5	WDFY4	0	0	0	0	0	0	0	0	0	0	0	0	0	0	0	0	0	0	-7.04125	-7.12789	0	0	0	0	0	-7.5563	-7.88425	-7.26719	0	-8.14953	-7.7145	0	0	0	0
5	HAVCR2	0	0	0	0	0	0	0	0	0	0	0	0	0	0	0	0	0	0	-7.379	-7.29207	0	0	0	0	0	-7.90875	-7.49335	-7.55889	-7.11823	-9.87086	-8.50493	0	0	0	0
5	LSP1	0	0	0	0	0	0	0	0	0	0	0	0	0	0	0	0	0	0	-8.48496	-8.38367	0	0	0	0	0	-8.17783	-7.45469	-7.57698	0	-9.3814	-8.38222	0	0	0	-7.23487
5	ARHGAP30	0	0	0	0	0	0	0	0	0	0	0	0	0	0	0	0	0	0	-7.93347	-7.91527	0	0	0	0	-7.29128	-8.65512	-8.70955	-8.47033	0	-10.1618	-9.28078	0	0	0	-7.96927
5	SELPLG	0	0	0	0	0	0	0	0	0	0	0	0	0	0	0	0	0	0	-7.08351	-7.03108	0	0	0	0	0	-8.20793	-7.75166	-7.40663	0	-9.66214	-8.34873	0	0	-7.5837	-7.83639
5	ARHGDIB	0	0	0	0	0	0	0	0	0	0	0	0	0	0	0	0	0	0	-7.11381	-7.01101	0	-7.04957	0	0	0	0	-7.48915	-7.11959	0	-8.05067	-7.19849	0	0	0	0
5	GIMAP1	0	0	0	0	0	0	0	0	0	0	0	0	0	0	0	0	0	0	-7.67694	-7.5924	0	0	0	0	0	0	-7.90384	-7.25381	0	-8.65968	-7.5964	0	0	0	0
5	HLA-DPB1	0	0	0	0	0	0	0	0	0	0	0	0	0	0	0	0	0	0	-8.22783	-7.53776	0	-7.19526	0	0	0	-7.07573	-8.26896	-7.33857	0	-8.33563	-8.41825	0	-7.16869	0	-7.47367
5	HLA-DPA1	0	0	0	0	0	0	0	0	0	0	0	0	0	0	0	0	0	0	-8.14671	-7.46589	0	-7.34302	0	0	0	-7.06567	-8.05316	-7.37231	0	-8.55705	-7.93249	0	-7.07909	0	0
5	EVI2A	0	0	0	0	0	0	0	0	0	0	0	0	0	0	0	-7.06061	0	0	-7.38613	-7.65032	0	0	0	0	0	-8.03388	-7.47593	-7.11043	0	-7.33926	0	0	0	0	0
5	SLC46A3	0	0	0	0	0	0	0	0	0	0	0	0	0	0	0	0	0	0	-7.06078	-7.04382	0	0	0	0	0	-8.15689	-7.47459	-7.74906	0	-7.45461	0	0	0	0	0
5	MYLK	0	0	0	0	0	0	0	0	0	0	0	0	0	0	0	0	0	0	-7.13386	-7.2916	-7.26546	0	0	0	0	-7.24482	-7.78201	-7.39977	0	0	0	0	0	0	0
5	HMOX1	0	0	0	0	0	0	0	0	0	0	0	0	0	0	0	0	0	0	0	-7.21283	0	0	0	0	0	-7.98251	-7.92573	-7.32179	0	-8.4227	0	0	0	0	0
5	CSF1R	0	0	0	0	0	0	0	0	0	0	0	0	0	0	0	0	0	0	0	-7.00675	0	0	0	0	0	-8.44153	-8.67945	-7.94394	0	-8.502	0	0	0	0	0
5	CFD	0	0	0	0	0	0	0	0	0	0	0	0	0	0	0	0	0	0	0	-7.5817	0	0	0	0	0	-7.77619	-7.49114	-7.26215	0	0	0	0	0	0	0
5	TICAM2	0	0	0	0	0	0	0	0	0	0	0	0	0	0	0	0	0	0	0	-7.17851	0	0	0	-7.06307	0	-7.46651	-7.48762	-8.22016	0	-7.20892	-7.13126	0	0	0	0
5	SFMBT2	0	0	0	0	0	0	0	0	0	0	0	0	0	0	0	0	0	0	0	0	0	0	0	0	0	0	-7.30954	0	0	-7.45843	-8.06078	0	0	0	-7.46712
5	HLA-DRA	0	0	0	0	0	0	0	0	0	0	0	0	0	0	0	0	0	0	0	0	0	0	0	0	0	0	-7.44114	0	0	-8.2234	-7.92634	0	0	0	-7.31468
5	ZNF683	0	0	0	0	0	0	0	0	0	0	0	0	0	0	0	0	0	0	0	0	0	0	0	0	0	0	0	0	0	-7.67796	-8.34355	0	0	0	-7.05398
5	C2	0	0	0	0	0	0	0	0	0	0	0	0	0	0	0	0	0	0	0	0	0	0	0	0	0	0	-7.25245	-7.22914	0	-8.36734	-8.40294	0	0	0	-8.04757
5	HLA-E	0	0	0	0	0	0	0	0	0	0	0	0	0	0	0	0	0	0	0	0	0	0	0	0	0	0	-7.99322	-7.28953	0	-8.80452	-9.05911	0	0	0	-7.8053
5	HLA-DRB1	0	0	0	0	0	0	0	0	0	0	0	0	0	0	0	0	0	0	0	0	0	0	0	0	0	0	-8.02467	0	0	-8.32787	-7.97673	0	-7.1684	0	-7.00366
5	HLA-DMA	0	0	0	0	0	0	0	0	0	0	0	0	0	0	0	0	0	0	-7.63305	0	0	0	0	0	0	0	-7.96582	0	0	-8.91395	-8.24391	0	-7.79716	0	-7.70281
5	APOL3	0	0	0	0	0	0	0	0	0	0	0	0	0	0	0	0	0	0	-7.09921	0	0	0	0	0	0	0	-7.13726	0	0	-8.56352	-8.0134	0	0	0	-7.97418
5	CASP1	0	0	0	0	0	0	0	0	0	0	0	0	0	0	0	0	0	0	-7.36884	0	0	0	0	0	0	0	0	0	0	-8.86762	-7.99822	0	0	0	-7.57277
5	PYCARD	0	0	0	0	0	0	0	0	0	0	0	0	0	0	0	0	0	0	-7.42486	0	0	0	0	0	0	0	0	0	0	-9.17043	-7.53922	0	0	0	0
5	PLAUR	0	0	0	0	0	0	0	0	0	0	0	0	0	0	0	0	0	0	0	0	0	0	0	0	0	-7.04625	0	0	0	-7.19971	-7.12512	0	0	0	0
5	MUC16	0	0	0	0	0	0	0	0	0	0	0	0	0	0	0	0	0	0	0	0	0	0	0	0	0	-7.21183	0	0	0	-7.01689	-7.27686	0	0	0	-7.13301
5	ITGAX	0	0	0	0	0	0	0	0	0	0	0	0	0	0	0	0	0	0	0	0	0	0	0	0	0	-7.39096	-7.54986	0	0	-8.50719	-8.82668	0	0	0	-7.7418
5	ALOX5	0	0	0	0	0	0	0	0	0	0	0	0	0	0	0	0	0	0	0	0	0	0	0	0	0	-7.45482	-7.81411	0	0	-8.35754	-8.35957	0	0	0	-8.87779
5	MYO1F	0	0	0	0	0	0	0	0	0	0	0	0	0	0	0	0	0	0	0	0	0	0	0	0	0	-7.34554	-7.67219	0	0	-8.67399	-7.50806	0	0	0	-7.06546
5	PTAFR	0	0	0	0	0	0	0	0	0	0	0	0	0	0	0	0	0	0	0	0	0	0	0	0	0	-7.89077	-7.30116	-7.41429	0	-10.3611	-8.06791	0	0	0	-8.58924
5	RNF213	0	0	0	0	0	0	0	0	0	0	0	0	0	0	0	0	0	0	0	0	0	0	0	0	0	0	-7.42236	0	0	-8.50312	-8.31698	0	0	0	0
5	OSMR	0	0	0	0	0	0	0	0	0	0	0	0	0	0	0	0	0	0	0	0	0	-7.25781	0	0	0	0	-7.80586	0	0	-8.34747	-10.3458	0	0	0	0
5	HLA-DQB1	0	0	0	0	0	0	0	0	0	0	0	0	0	0	0	0	0	0	0	0	0	0	0	0	0	0	-7.08092	0	0	0	-7.04831	0	0	0	0
5	VDR	0	0	0	0	0	0	0	0	0	0	0	0	0	0	0	0	0	0	0	0	0	0	0	0	0	0	-7.45054	-7.65244	0	-7.21383	-7.93033	0	0	0	0
5	TRIM22	0	0	0	0	0	0	0	0	0	0	0	0	0	0	0	0	0	0	0	0	0	0	0	0	0	0	-7.18913	-7.073	0	-8.55995	-7.64862	0	0	0	0
5	TFAP2C	0	0	0	0	0	0	0	0	0	0	0	0	0	0	0	0	0	0	0	0	0	0	0	0	0	0	-7.10037	-9.07911	0	-8.33865	-7.31001	0	0	0	0
5	KRT23	0	0	0	0	0	0	0	0	0	0	0	0	0	0	0	0	0	0	0	0	0	-7.1536	0	0	0	0	-7.24315	-8.35755	0	-9.06194	-8.88686	0	0	0	0
5	LYN	0	0	0	0	0	0	0	0	0	0	0	0	0	0	0	0	0	0	0	0	0	-7.12161	0	0	-8.23954	-7.75805	-9.43489	-9.2831	-9.06364	-10.8	-8.88816	0	0	-7.46203	-7.13409
5	SQRDL	0	0	0	0	0	0	0	0	0	0	0	0	0	0	0	0	0	0	0	0	0	-7.15056	0	0	-7.44959	-7.28282	-9.80545	-8.47371	-7.92468	-10.9064	-8.9194	0	-7.19962	-8.52975	-8.54842
5	IL4R	0	0	0	0	0	0	0	0	0	0	0	0	0	0	0	0	0	0	0	0	0	-8.04116	0	0	0	-8.55275	-8.05849	-8.43329	-7.52524	-10.2272	-9.97991	0	0	0	-7.08247
5	APOL1	0	0	0	0	0	0	0	0	0	0	0	0	0	0	0	0	0	0	-7.0519	0	0	0	0	0	0	-7.60847	-7.2785	-8.0977	-7.89669	-9.60005	-9.94978	0	0	-9.66961	-8.45109
5	GBP2	0	0	0	0	0	0	0	0	0	0	0	0	0	0	0	0	0	0	-7.04659	0	0	-7.85853	0	0	0	-8.25641	-8.54624	-8.25819	-7.60816	-7.95502	-10.3396	0	0	-7.75127	-8.47218
5	OSTF1	0	0	0	0	0	0	0	0	0	0	0	0	0	0	0	0	0	0	0	0	0	0	0	0	0	-7.28332	-7.12126	-8.59903	-8.40741	-7.92126	-7.26709	0	0	0	0
5	HMHA1	0	0	0	0	0	0	0	0	0	0	0	0	0	0	0	0	0	0	0	0	0	0	0	0	0	-8.71852	-8.84221	-8.59587	-7.25289	-7.30707	-7.5931	0	0	0	0
5	CD68	0	0	0	0	0	0	0	0	0	0	0	0	0	0	0	0	0	0	0	0	0	0	0	0	0	-7.61702	0	-7.34195	-8.19612	-9.42177	-8.90016	0	0	-7.02141	0
5	CARD6	0	0	0	0	0	0	0	0	0	0	0	0	0	0	0	0	0	0	0	0	0	-8.39888	0	0	0	-7.29998	-7.41044	-7.34956	0	-7.89853	-8.95963	0	0	-8.22508	0
5	RHBDL2	0	0	0	0	0	0	0	0	0	0	0	0	0	0	0	0	0	0	0	0	0	-7.71804	0	0	0	-7.26761	-7.52599	-8.26964	0	-10.3828	-8.97431	0	0	-7.41953	0
5	SERPINA1	0	0	0	0	0	0	0	0	0	0	0	0	0	0	0	0	0	0	0	0	0	-7.96671	0	0	0	-7.83311	-8.98426	-8.53425	-7.87936	-8.77444	-8.19733	0	0	-7.04293	0
5	S100A11	0	0	0	0	0	0	0	0	0	0	0	0	0	0	0	0	0	0	0	0	0	-8.11932	0	0	-7.21311	0	-7.95513	-8.8639	0	-7.0075	0	0	0	-8.09525	0
5	LMNA	0	0	0	0	0	0	0	0	0	0	0	0	0	0	0	0	0	0	0	0	-8.60514	-8.97662	0	0	0	-7.64768	-7.90455	-8.25652	0	0	-7.66587	0	0	-7.89759	-7.73796
5	RUNX1	0	0	0	0	0	0	0	0	0	0	0	0	0	0	0	0	0	0	0	0	-9.29385	-8.44307	0	-7.08859	-7.08995	-7.31355	-8.56127	-8.54807	0	0	-7.69588	0	-7.53163	-8.02376	-7.2842
5	KIAA0247	0	0	0	0	0	0	0	0	0	0	0	0	0	0	0	0	0	0	0	0	-8.40804	-9.23837	0	0	-7.43075	-9.49852	-10.6437	-9.76796	0	-7.68358	-8.54904	0	-8.73277	-7.33957	-9.55479
5	MVP	0	0	0	0	0	0	0	0	0	0	0	0	0	0	0	0	0	0	0	0	-8.12623	-9.86892	0	0	-7.47477	-10.5346	-12.1422	-9.79054	0	-8.42198	-9.72928	-7.1121	-10.7283	-9.3041	-10.4247
5	CD74	0	0	0	0	0	0	0	0	0	0	0	0	0	0	0	0	0	0	0	0	0	-7.3811	0	0	0	-7.33167	-9.05237	-8.28297	0	-9.3231	-8.94566	0	-8.11063	-7.00055	-8.83883
6	ZNF232	-8.5639	-8.96768	0	0	0	0	0	0	0	-8.30445	0	0	0	0	-7.79094	0	0	0	0	0	0	0	0	0	0	0	0	0	0	0	0	0	0	0	0
6	ZKSCAN3	-7.0409	-7.51701	0	0	0	0	0	0	0	-9.69378	0	0	0	0	-7.64222	0	0	0	0	0	0	0	0	0	0	0	0	0	0	0	0	0	0	0	0
6	HIF3A	0	-7.38982	0	0	0	0	0	0	0	-8.03785	0	0	0	0	-7.22307	0	0	0	0	0	0	0	0	0	0	0	0	0	0	0	0	0	0	0	0
6	SMARCD1	0	-8.08605	0	0	0	0	0	0	0	-7.63706	0	0	0	0	-7.6492	0	0	0	0	0	0	0	0	0	0	0	0	0	0	0	0	0	0	0	0
6	HDAC2	0	-7.21364	0	0	0	0	0	0	0	-7.09057	0	0	0	0	0	0	0	0	0	0	0	0	0	0	0	0	0	0	0	0	0	0	0	0	0
6	EFNA3	0	-7.65053	0	0	0	0	0	0	0	-7.74381	0	0	0	0	0	0	0	0	0	0	0	0	0	0	0	0	0	0	0	0	0	0	0	0	0
6	SLC10A4	0	-7.30219	0	0	0	0	0	0	0	-7.8167	0	0	0	0	0	0	0	0	0	0	0	0	0	0	0	0	0	0	0	0	0	0	0	0	0
6	CCDC77	-7.68389	-8.04018	0	0	0	0	0	0	0	-7.27956	0	0	0	0	0	0	0	0	0	0	0	0	0	0	0	0	0	0	0	0	0	0	0	0	0
6	TEAD2	-8.53313	-9.51309	0	0	0	0	0	0	0	-7.67323	0	0	0	0	0	0	0	0	0	0	0	0	0	0	0	0	0	0	0	0	0	0	0	0	0
6	PRPSAP2	-7.73511	-7.01361	0	0	0	0	0	0	0	-7.07795	0	0	0	0	0	0	0	0	0	0	0	0	0	0	0	0	0	0	0	0	0	0	0	0	0
6	ERAL1	-7.90771	-7.0871	0	0	0	0	0	0	0	-7.75151	0	0	0	0	0	0	0	0	0	0	0	0	0	0	0	0	0	0	0	0	0	0	0	0	0
6	SPAST	-7.52536	-7.69221	0	0	0	0	0	0	0	-8.74145	0	0	0	0	0	0	0	0	0	0	0	0	0	0	0	0	0	0	0	0	0	0	0	0	0
6	E2F6	-7.74626	-7.24385	0	0	0	0	0	0	0	-9.90378	0	0	0	0	0	0	0	0	0	0	0	0	0	0	0	0	0	0	0	0	0	0	0	0	0
6	CCDC138	-7.10928	0	0	0	0	0	0	0	0	-8.04801	0	0	0	0	0	0	0	0	0	0	0	0	0	0	0	0	0	0	0	0	0	0	0	0	0
6	ARG2	-8.00141	-8.19797	-7.94782	0	0	0	0	0	0	-7.89575	0	0	0	0	0	0	0	0	0	0	0	0	0	0	0	0	0	0	0	0	0	0	0	0	0
6	HIST1H4L	-8.3558	-7.86056	-7.88626	0	0	0	0	0	0	-7.51152	0	0	0	0	0	0	0	0	0	0	0	0	0	0	0	0	0	0	0	0	0	0	0	0	0
6	MAD2L2	-8.25414	-7.03817	-7.36568	0	0	0	0	0	0	-7.46981	0	0	0	0	0	0	0	0	0	0	0	0	0	0	0	0	0	0	0	0	0	0	0	0	0
6	SLC16A10	-7.46095	-7.66125	-7.95062	0	0	0	0	0	0	-8.36688	0	0	0	0	0	0	0	0	0	0	0	0	0	0	0	0	0	0	0	0	0	0	0	0	0
6	EFNA4	-8.65822	-10.3154	-9.44478	0	0	0	0	0	0	-8.45251	0	0	0	0	0	0	0	0	0	0	0	0	0	0	0	0	0	0	0	0	0	0	0	0	0
6	ODC1	-8.85718	-8.97896	-7.47283	0	0	0	0	0	0	-7.81093	0	0	0	0	0	0	0	0	0	0	0	0	0	0	0	0	0	0	0	0	0	0	0	0	0
6	CCNJ	-9.61903	-11.0271	-8.68689	0	0	0	0	0	0	-9.1041	0	0	0	0	0	0	0	0	0	0	0	0	0	0	0	0	0	0	0	0	0	0	0	0	0
6	TIMELESS	-10.7415	-9.99344	-7.9967	0	0	0	0	0	0	-8.24748	0	0	0	0	0	0	0	0	0	0	0	0	0	0	0	0	0	0	0	0	0	0	0	0	0
6	DNMT3A	-10.0115	-11.6939	-7.68158	0	0	0	0	0	0	-8.6251	0	0	-8.24642	0	0	0	0	0	0	0	0	0	0	0	0	0	0	0	0	0	0	0	0	0	0
6	HMGA2	0	-7.03226	-8.44296	0	0	0	0	0	0	-8.70352	0	0	0	0	0	0	0	0	0	0	0	0	0	0	0	0	0	0	0	0	0	0	0	0	0
6	MAP2K6	-8.37962	-8.45884	-7.12424	0	0	0	0	0	0	0	-7.43672	0	0	0	0	0	0	0	0	0	0	0	0	0	0	0	0	0	0	0	0	0	0	0	0
6	SPATS2	-8.01614	-10.1694	-8.17858	0	0	0	0	0	0	0	-7.05642	0	0	0	0	0	0	0	0	0	0	0	0	0	0	0	0	0	0	0	0	0	0	0	0
6	STMN1	-12.5278	-12.3702	-9.39093	0	0	0	0	0	0	-8.01525	-8.66565	0	0	0	0	0	0	0	0	0	0	0	0	0	0	0	0	0	0	0	0	0	0	0	0
6	SAE1	-11.749	-11.5091	-9.75785	-7.70654	0	0	0	0	0	0	-7.55928	0	0	0	0	0	0	0	0	0	0	0	0	0	0	0	0	0	0	0	0	0	0	0	0
6	ZBTB5	-7.19562	-7.64426	-7.18593	0	0	-7.07401	0	0	0	0	-7.02648	0	0	0	0	0	0	0	0	0	0	0	0	0	0	0	0	0	0	0	0	0	0	0	0
6	FANCC	-7.10879	-7.33673	0	0	0	0	0	0	0	0	-7.06953	0	0	0	0	0	0	0	0	0	0	0	0	0	0	0	0	0	0	0	0	0	0	0	0
6	GPAM	-8.13291	-7.79668	0	0	0	0	0	0	0	0	-7.58256	0	0	0	0	0	0	0	0	0	0	0	0	0	0	0	0	0	0	0	0	0	0	0	0
6	TMEM97	-7.58786	-7.03564	0	0	0	0	0	0	0	0	-7.50962	0	0	0	0	0	0	0	0	0	0	0	0	0	0	0	0	0	0	0	0	0	0	0	0
6	SUV39H2	-8.33911	-7.3605	0	0	0	0	0	0	0	0	-7.92432	0	0	0	0	0	0	0	0	0	0	0	0	0	0	0	0	0	0	0	0	0	0	0	0
6	ST6GALNAC3	-7.70283	-9.35958	-8.38606	0	0	0	0	0	0	-7.97066	-7.29171	0	0	0	-8.09889	0	0	0	0	0	0	0	0	0	0	0	0	0	0	0	0	0	0	0	0
6	MARCKSL1	-8.82902	-11.0738	-8.73878	0	0	0	0	0	0	-8.43592	-8.85559	0	0	0	-8.40771	0	0	0	0	0	0	0	0	0	0	0	0	0	0	0	0	0	0	0	0
6	SEPHS1	-7.14761	-7.98493	-8.34486	0	0	0	0	0	0	-7.65077	-8.00614	0	0	0	-9.06299	0	0	0	0	0	0	0	0	0	0	0	0	0	0	0	0	0	0	0	0
6	SKP2	-11.6467	-10.349	-9.08456	0	0	0	0	0	0	-8.12308	-8.04795	0	0	0	-7.27522	0	0	0	0	0	0	0	0	0	0	0	0	0	0	0	0	0	0	0	0
6	GPR98	-8.91716	-11.1218	-9.68858	0	0	0	0	0	-7.60852	-8.54256	-8.27397	0	0	0	-8.05302	0	0	0	0	0	0	0	0	0	0	0	0	0	0	0	0	0	0	0	0
6	MEST	-9.781	-10.8783	-11.9022	-7.98081	0	0	-7.54477	0	-7.56021	-9.20802	-8.85236	0	0	0	-7.18473	0	0	0	0	0	0	0	0	0	0	0	0	0	0	0	0	0	0	0	0
6	ZNF682	-8.27208	-7.55985	0	0	0	0	0	0	0	0	-7.13681	0	0	0	-7.51641	0	0	0	0	0	0	0	0	0	0	0	0	0	0	0	0	0	0	0	0
6	SNN	-8.57201	-9.53102	0	0	0	0	0	0	0	-7.95092	-7.65567	0	0	0	-7.88185	0	0	0	0	0	0	0	0	0	0	0	0	0	0	0	0	0	0	0	0
6	TOX3	-10.3753	-8.93969	-7.7127	0	0	0	-7.20487	0	-7.37223	0	0	0	0	0	0	0	0	0	0	0	0	0	0	0	0	0	0	0	0	0	0	0	0	0	0
6	EFS	-9.09884	-11.7868	-9.73509	0	0	0	-8.31918	0	-7.50863	0	0	0	0	0	0	0	0	0	0	0	0	0	0	0	0	0	0	0	0	0	0	0	0	0	0
6	SMTNL2	-8.65148	-9.0403	-7.35276	0	0	0	-7.04073	0	0	0	0	0	0	0	0	0	0	0	0	0	0	0	0	0	0	0	0	0	0	0	0	0	0	0	0
6	RHOBTB1	-7.52139	-10.9182	-9.03466	0	0	0	-7.55512	0	0	0	0	0	0	0	0	0	0	0	0	0	0	0	0	0	0	0	0	0	0	0	0	0	0	0	0
6	WASF1	-9.00775	-9.84324	-7.38769	0	0	0	0	0	-7.21098	0	0	0	0	0	0	0	0	0	0	0	0	0	0	0	0	0	0	0	0	0	0	0	0	0	0
6	SOX11	-7.6944	-10.5743	-9.13218	0	0	0	0	0	-7.15888	0	0	0	0	0	0	0	0	0	0	0	0	0	0	0	0	0	0	0	0	0	0	0	0	0	0
6	PLCG1	-7.00758	-10.0838	-8.43026	0	0	0	0	0	-7.49827	0	0	0	0	0	-7.11433	0	0	0	0	0	0	0	0	0	0	0	0	0	0	0	0	0	0	0	0
6	BTBD3	-8.34997	-8.08395	0	0	0	0	-7.51747	-8.13473	-8.42922	0	0	0	0	0	0	0	0	0	0	0	0	0	0	0	0	0	0	0	0	0	0	0	0	0	0
6	KIAA0895	-7.10816	-8.6441	0	0	0	0	-7.1031	-9.05937	-8.81904	0	0	0	0	0	0	0	0	0	0	0	0	0	0	0	0	0	0	0	0	0	0	0	0	0	0
6	SEC61A2	-10.0202	-9.02482	0	0	0	0	-7.48456	0	-7.25461	-7.26948	0	0	0	0	0	0	0	0	0	0	0	0	0	0	0	0	0	0	0	0	0	0	0	0	0
6	FZD2	-7.7285	-10.502	-8.76879	0	0	0	0	0	0	0	0	0	0	0	0	0	0	0	0	0	0	0	0	0	0	0	0	0	0	0	0	0	0	0	0
6	MFAP2	-7.13449	-10.6829	-9.4379	0	0	0	0	0	0	0	0	0	0	0	0	0	0	0	0	0	0	0	0	0	0	0	0	0	0	0	0	0	0	0	0
6	VASH2	-8.53342	-10.9166	-10.4809	0	0	0	0	0	0	0	0	0	0	0	0	0	0	0	0	0	0	0	0	0	0	0	0	0	0	0	0	0	0	0	0
6	MTF2	-8.53908	-9.82341	-8.50469	0	0	0	0	0	0	0	0	0	0	0	0	0	0	0	0	0	0	0	0	0	0	0	0	0	0	0	0	0	0	0	0
6	PGBD1	-9.38005	-10.991	-9.44223	0	0	0	0	0	0	0	0	0	0	0	0	0	0	0	0	0	0	0	0	0	0	0	0	0	0	0	0	0	0	0	0
6	MTMR2	-7.29167	-8.66955	-7.87006	0	0	0	0	0	0	0	0	0	0	0	0	0	0	0	0	0	0	0	0	0	0	0	0	0	0	0	0	0	0	0	0
6	SLC35B4	-7.3953	-8.15242	-7.41995	0	0	0	0	0	0	0	0	0	0	0	0	0	0	0	0	0	0	0	0	0	0	0	0	0	0	0	0	0	0	0	0
6	PRTFDC1	-8.08215	-8.96644	-8.11687	0	0	0	0	0	0	0	0	0	0	0	0	0	0	0	0	0	0	0	0	0	0	0	0	0	0	0	0	0	0	0	0
6	BUD13	-7.34818	-8.2076	-7.65068	0	0	0	0	0	0	0	0	0	0	0	0	0	0	0	0	0	0	0	0	0	0	0	0	0	0	0	0	0	0	0	0
6	KLHL7	-7.17331	-7.6084	-7.00276	0	0	0	0	0	0	0	0	0	0	0	0	0	0	0	0	0	0	0	0	0	0	0	0	0	0	0	0	0	0	0	0
6	PAFAH1B3	-7.4556	-8.03604	-7.1043	0	0	0	0	0	0	0	0	0	0	0	0	0	0	0	0	0	0	0	0	0	0	0	0	0	0	0	0	0	0	0	0
6	ZBTB34	-7.75811	-8.62698	-8.32492	0	0	0	0	0	0	0	0	0	0	0	0	0	0	0	0	0	0	0	0	0	0	0	0	0	0	0	0	0	0	0	0
6	GPX7	-8.82271	-9.87688	-9.53308	0	0	0	0	0	0	0	0	0	0	0	0	0	0	0	0	0	0	0	0	0	0	0	0	0	0	0	0	0	0	0	0
6	IGSF3	-8.99713	-10.5763	-7.74722	0	0	0	0	0	0	0	0	0	0	0	0	0	0	0	0	0	0	0	0	0	0	0	0	0	0	0	0	0	0	0	0
6	CBX1	-9.13779	-10.6627	-7.80301	0	0	0	0	0	0	0	0	0	0	0	0	0	0	0	0	0	0	0	0	0	0	0	0	0	0	0	0	0	0	0	0
6	KDELC1	-7.79885	-8.98993	-7.23139	0	0	0	0	0	0	0	0	0	0	0	0	0	0	0	0	0	0	0	0	0	0	0	0	0	0	0	0	0	0	0	0
6	PKIA	-7.24482	-9.62751	-7.11022	0	0	0	0	0	0	0	0	0	0	0	0	0	0	0	0	0	0	0	0	0	0	0	0	0	0	0	0	0	0	0	0
6	H2AFY2	-8.78349	-10.9744	-8.08361	0	0	0	0	0	0	0	0	0	0	0	0	0	0	0	0	0	0	0	0	0	0	0	0	0	0	0	0	0	0	0	0
6	VAX2	-8.70308	-8.86498	-7.80094	0	0	0	0	0	0	0	0	0	0	0	0	0	0	0	0	0	0	0	0	0	0	0	0	0	0	0	0	0	0	0	0
6	TUBB	-8.7482	-9.00083	-7.86345	0	0	0	0	0	0	0	0	0	0	0	0	0	0	0	0	0	0	0	0	0	0	0	0	0	0	0	0	0	0	0	0
6	CDC7	-8.69549	-8.6633	-7.87992	0	0	0	0	0	0	0	0	0	0	0	0	0	0	0	0	0	0	0	0	0	0	0	0	0	0	0	0	0	0	0	0
6	DLEU7	-8.35256	-7.84604	-7.24795	0	0	0	0	0	0	0	0	0	0	0	0	0	0	0	0	0	0	0	0	0	0	0	0	0	0	0	0	0	0	0	0
6	ZNF93	-8.08278	-8.09094	-7.69363	0	0	0	0	0	0	0	0	0	0	0	0	0	0	0	0	0	0	0	0	0	0	0	0	0	0	0	0	0	0	0	0
6	INA	-8.11143	-8.33483	-7.81149	0	0	0	0	0	0	0	0	0	0	0	0	0	0	0	0	0	0	0	0	0	0	0	0	0	0	0	0	0	0	0	0
6	CADM4	-8.22366	-8.49451	-7.04226	0	0	0	0	0	0	0	0	0	0	0	0	0	0	0	0	0	0	0	0	0	0	0	0	0	0	0	0	0	0	0	0
6	OTUD3	-8.56031	-8.92342	-7.16138	0	0	0	0	0	0	0	0	0	0	0	0	0	0	0	0	0	0	0	0	0	0	0	0	0	0	0	0	0	0	0	0
6	CHEK1	-8.07281	-7.05268	-7.33699	0	0	0	0	0	0	0	0	0	0	0	0	0	0	0	0	0	0	0	0	0	0	0	0	0	0	0	0	0	0	0	0
6	CDC25A	-8.87519	-7.41045	-8.27675	0	0	0	0	0	0	0	0	0	0	0	0	0	0	0	0	0	0	0	0	0	0	0	0	0	0	0	0	0	0	0	0
6	CCDC99	-10.0122	-9.15423	-7.67849	0	0	0	0	0	0	0	0	0	0	0	0	0	0	0	0	0	0	0	0	0	0	0	0	0	0	0	0	0	0	0	0
6	GINS1	-10.6889	-9.44939	-7.81821	0	0	0	0	0	0	0	0	0	0	0	0	0	0	0	0	0	0	0	0	0	0	0	0	0	0	0	0	0	0	0	0
6	WDHD1	-10.1323	-8.89611	-7.84011	0	0	0	0	0	0	0	0	0	0	0	0	0	0	0	0	0	0	0	0	0	0	0	0	0	0	0	0	0	0	0	0
6	CENPO	-10.8381	-9.43674	-8.58702	0	0	0	0	0	0	0	0	0	0	0	0	0	0	0	0	0	0	0	0	0	0	0	0	0	0	0	0	0	0	0	0
6	TUBB8	-10.1454	-9.54631	-7.2765	0	0	0	0	0	0	0	0	0	0	0	0	0	0	0	0	0	0	0	0	0	0	0	0	0	0	0	0	0	0	0	0
6	KIF15	-10.4965	-8.09521	-7.05348	0	0	0	0	0	0	0	0	0	0	0	0	0	0	0	0	0	0	0	0	0	0	0	0	0	0	0	0	0	0	0	0
6	SLC19A2	0	-8.47864	-7.65717	0	0	0	0	0	0	0	0	0	0	0	0	0	0	0	0	0	0	0	0	0	0	0	0	0	0	0	0	0	0	0	0
6	MEX3B	0	-9.2099	-8.18111	0	0	0	0	0	0	0	0	0	0	0	0	0	0	0	0	0	0	0	0	0	0	0	0	0	0	0	0	0	0	0	0
6	NAV1	0	-8.50539	-7.83882	0	0	0	0	0	0	0	0	0	0	0	0	0	0	0	0	0	0	0	0	0	0	0	0	0	0	0	0	0	0	0	0
6	FSCN1	0	-7.76837	-7.46456	0	0	0	0	0	0	0	0	0	0	0	0	0	0	0	0	0	0	0	0	0	0	0	0	0	0	0	0	0	0	0	0
6	PLEKHG2	0	-8.49451	-7.01951	0	0	0	0	0	0	0	0	0	0	0	0	0	0	0	0	0	0	0	0	0	0	0	0	0	0	0	0	0	0	0	0
6	DCHS1	0	-8.85872	-7.17087	0	0	0	0	0	0	0	0	0	0	0	0	0	0	0	0	0	0	0	0	0	0	0	0	0	0	0	0	0	0	0	0
6	PARD6G	0	-9.37779	-7.30567	0	0	0	0	0	0	0	0	0	0	0	0	0	0	0	0	0	0	0	0	0	0	0	0	0	0	0	0	0	0	0	0
6	CLDN6	0	-7.50817	-7.85574	0	0	0	0	0	0	0	0	0	0	0	0	0	0	0	0	0	0	0	0	0	0	0	0	0	0	0	0	0	0	0	0
6	RHOBTB3	0	-7.73077	-8.24428	0	0	0	0	0	0	0	0	0	0	0	0	0	0	0	0	0	0	0	0	0	0	0	0	0	0	0	0	0	0	0	0
6	TUBB3	0	-7.63116	-7.82288	0	0	0	0	0	0	0	0	0	0	0	0	0	0	0	0	0	0	0	0	0	0	0	0	0	0	0	0	0	0	0	0
6	MAGEL2	0	-8.03854	-8.21146	0	0	0	0	0	0	0	0	0	0	0	0	0	0	0	0	0	0	0	0	0	0	0	0	0	0	0	0	0	0	0	0
6	LRRN1	0	-7.98417	-8.23593	0	0	0	0	0	0	0	0	0	0	0	0	0	0	0	0	0	0	0	0	0	0	0	0	0	0	0	0	0	0	0	0
6	KALRN	0	-9.73737	-7.94858	0	0	0	0	0	0	0	0	0	-9.41986	0	0	0	0	0	0	0	0	0	0	0	0	0	0	0	0	0	0	0	0	0	0
6	CENPJ	-7.6922	-7.46004	0	0	0	0	0	0	0	0	0	0	0	0	0	0	0	0	0	0	0	0	0	0	0	0	0	0	0	0	0	0	0	0	0
6	NKIRAS2	-9.22715	-8.96676	0	0	0	0	0	0	0	0	0	0	0	0	0	0	0	0	0	0	0	0	0	0	0	0	0	0	0	0	0	0	0	0	0
6	FOXRED2	-7.82084	-7.56937	0	0	0	0	0	0	0	0	0	0	0	0	0	0	0	0	0	0	0	0	0	0	0	0	0	0	0	0	0	0	0	0	0
6	ZNF620	-7.17551	-7.00474	0	0	0	0	0	0	0	0	0	0	0	0	0	0	0	0	0	0	0	0	0	0	0	0	0	0	0	0	0	0	0	0	0
6	H3F3A	-7.44872	-7.15419	0	0	0	0	0	0	0	0	0	0	0	0	0	0	0	0	0	0	0	0	0	0	0	0	0	0	0	0	0	0	0	0	0
6	BRIP1	-7.26272	-7.17988	0	0	0	0	0	0	0	0	0	0	0	0	0	0	0	0	0	0	0	0	0	0	0	0	0	0	0	0	0	0	0	0	0
6	BMF	-10.6949	-10.512	0	0	0	0	0	0	0	0	0	0	0	0	0	0	0	0	0	0	0	0	0	0	0	0	0	0	0	0	0	0	0	0	0
6	SRP14	-7.47418	-7.45176	0	0	0	0	0	0	0	0	0	0	0	0	0	0	0	0	0	0	0	0	0	0	0	0	0	0	0	0	0	0	0	0	0
6	B3GNT5	-8.94785	-8.89791	0	0	0	0	0	0	0	0	0	0	0	0	0	0	0	0	0	0	0	0	0	0	0	0	0	0	0	0	0	0	0	0	0
6	BFSP1	-7.81604	-8.11401	0	0	0	0	0	0	0	0	0	0	0	0	0	0	0	0	0	0	0	0	0	0	0	0	0	0	0	0	0	0	0	0	0
6	HEY1	-8.57378	-8.83377	0	0	0	0	0	0	0	0	0	0	0	0	0	0	0	0	0	0	0	0	0	0	0	0	0	0	0	0	0	0	0	0	0
6	ZNF8	-7.58768	-7.65119	0	0	0	0	0	0	0	0	0	0	0	0	0	0	0	0	0	0	0	0	0	0	0	0	0	0	0	0	0	0	0	0	0
6	KPTN	-7.69664	-7.77367	0	0	0	0	0	0	0	0	0	0	0	0	0	0	0	0	0	0	0	0	0	0	0	0	0	0	0	0	0	0	0	0	0
6	FREM1	-7.69877	-7.80809	0	0	0	0	0	0	0	0	0	0	0	0	0	0	0	0	0	0	0	0	0	0	0	0	0	0	0	0	0	0	0	0	0
6	B4GALT6	-7.22569	-7.69881	0	0	0	0	0	0	0	0	0	0	0	0	0	0	0	0	0	0	0	0	0	0	0	0	0	0	0	0	0	0	0	0	0
6	IPO9	-7.64549	-8.1438	0	0	0	0	0	0	0	0	0	0	0	0	0	0	0	0	0	0	0	0	0	0	0	0	0	0	0	0	0	0	0	0	0
6	LASS4	-7.22591	-7.66738	0	0	0	0	0	0	0	0	0	0	0	0	0	0	0	0	0	0	0	0	0	0	0	0	0	0	0	0	0	0	0	0	0
6	CRY1	-7.31238	-7.69133	0	0	0	0	0	0	0	0	0	0	0	0	0	0	0	0	0	0	0	0	0	0	0	0	0	0	0	0	0	0	0	0	0
6	SMARCB1	-8.07421	-8.77608	0	0	0	0	0	0	0	0	0	0	0	0	0	0	0	0	0	0	0	0	0	0	0	0	0	0	0	0	0	0	0	0	0
6	BLMH	-9.2587	-10.112	0	0	0	0	0	0	0	0	0	0	0	0	0	0	0	0	0	0	0	0	0	0	0	0	0	0	0	0	0	0	0	0	0
6	MCM8	-7.94078	-7.25817	0	0	0	0	0	0	0	0	0	0	0	0	0	0	0	0	0	0	0	0	0	0	0	0	0	0	0	0	0	0	0	0	0
6	ZNF695	-8.92273	-8.15609	0	0	0	0	0	0	0	0	0	0	0	0	0	0	0	0	0	0	0	0	0	0	0	0	0	0	0	0	0	0	0	0	0
6	MARK1	-7.87033	-7.20932	0	0	0	0	0	0	0	0	0	0	0	0	0	0	0	0	0	0	0	0	0	0	0	0	0	0	0	0	0	0	0	0	0
6	CENPF	-9.72093	-8.85837	0	0	0	0	0	0	0	0	0	0	0	0	0	0	0	0	0	0	0	0	0	0	0	0	0	0	0	0	0	0	0	0	0
6	YWHAQ	-7.87151	-7.25251	0	0	0	0	0	0	0	0	0	0	0	0	0	0	0	0	0	0	0	0	0	0	0	0	0	0	0	0	0	0	0	0	0
6	TAF11	-9.47056	-8.44733	0	0	0	0	0	0	0	0	0	0	0	0	0	0	0	0	0	0	0	0	0	0	0	0	0	0	0	0	0	0	0	0	0
6	DNMT3B	-10.04	-8.97932	0	0	0	0	0	0	0	0	0	0	0	0	0	0	0	0	0	0	0	0	0	0	0	0	0	0	0	0	0	0	0	0	0
6	PARP2	-8.30222	-7.47258	0	0	0	0	0	0	0	0	0	0	0	0	0	0	0	0	0	0	0	0	0	0	0	0	0	0	0	0	0	0	0	0	0
6	CABYR	-7.80506	-7.34227	0	0	0	0	0	0	0	0	0	0	0	0	0	0	0	0	0	0	0	0	0	0	0	0	0	0	0	0	0	0	0	0	0
6	CKAP5	-8.57887	-8.0571	0	0	0	0	0	0	0	0	0	0	0	0	0	0	0	0	0	0	0	0	0	0	0	0	0	0	0	0	0	0	0	0	0
6	TMTC3	-8.28171	-7.81787	0	0	0	0	0	0	0	0	0	0	0	0	0	0	0	0	0	0	0	0	0	0	0	0	0	0	0	0	0	0	0	0	0
6	PIGU	-7.5066	-7.00909	0	0	0	0	0	0	0	0	0	0	0	0	0	0	0	0	0	0	0	0	0	0	0	0	0	0	0	0	0	0	0	0	0
6	NOTCH3	-7.06844	-9.2499	0	0	0	0	0	0	0	0	0	0	0	0	0	0	0	0	0	0	0	0	0	0	0	0	0	0	0	0	0	0	0	0	0
6	FLRT3	-7.14486	-9.38379	0	0	0	0	0	0	0	0	0	0	0	0	0	0	0	0	0	0	0	0	0	0	0	0	0	0	0	0	0	0	0	0	0
6	PRMT6	-7.46849	-8.80844	0	0	0	0	0	0	0	0	0	0	0	0	0	0	0	0	0	0	0	0	0	0	0	0	0	0	0	0	0	0	0	0	0
6	BLM	-9.69448	-8.17928	0	0	0	0	0	0	0	0	0	0	0	0	0	0	0	0	0	0	0	0	0	0	0	0	0	0	0	0	0	0	0	0	0
6	AP2S1	-10.3834	-8.80732	0	0	0	0	0	0	0	0	0	0	0	0	0	0	0	0	0	0	0	0	0	0	0	0	0	0	0	0	0	0	0	0	0
6	RPN2	-8.62451	-7.10362	0	0	0	0	0	0	0	0	0	0	0	0	0	0	0	0	0	0	0	0	0	0	0	0	0	0	0	0	0	0	0	0	0
6	VRK1	-8.64692	-7.14817	0	0	0	0	0	0	0	0	0	0	0	0	0	0	0	0	0	0	0	0	0	0	0	0	0	0	0	0	0	0	0	0	0
6	RAE1	-8.42783	-7.38028	0	0	0	0	0	0	0	0	0	0	0	0	0	0	0	0	0	0	0	0	0	0	0	0	0	0	0	0	0	0	0	0	0
6	FKBP3	-9.25077	-8.08319	0	0	0	0	0	0	0	0	0	0	0	0	0	0	0	0	0	0	0	0	0	0	0	0	0	0	0	0	0	0	0	0	0
6	ILF2	-9.64527	-8.40626	0	0	0	0	0	0	0	0	0	0	0	0	0	0	0	0	0	0	0	0	0	0	0	0	0	0	0	0	0	0	0	0	0
6	GTF3C5	-8.30571	-7.29751	0	0	0	0	0	0	0	0	0	0	0	0	0	0	0	0	0	0	0	0	0	0	0	0	0	0	0	0	0	0	0	0	0
6	ATAD5	-8.44014	-7.27022	0	0	0	0	0	0	0	0	0	0	0	0	0	0	0	0	0	0	0	0	0	0	0	0	0	0	0	0	0	0	0	0	0
6	E2F7	-9.80245	-8.49572	0	0	0	0	0	0	0	0	0	0	0	0	0	0	0	0	0	0	0	0	0	0	0	0	0	0	0	0	0	0	0	0	0
6	SLC25A15	-8.66004	-7.0603	0	0	0	0	0	0	0	0	0	0	0	0	0	0	0	0	0	0	0	0	0	0	0	0	0	0	0	0	0	0	0	0	0
6	RAD51AP1	-8.67478	-7.08076	0	0	0	0	0	0	0	0	0	0	0	0	0	0	0	0	0	0	0	0	0	0	0	0	0	0	0	0	0	0	0	0	0
6	PGD	-9.08245	-7.35128	0	0	0	0	0	0	0	0	0	0	0	0	0	0	0	0	0	0	0	0	0	0	0	0	0	0	0	0	0	0	0	0	0
6	BUB1B	-9.48146	-7.68133	0	0	0	0	0	0	0	0	0	0	0	0	0	0	0	0	0	0	0	0	0	0	0	0	0	0	0	0	0	0	0	0	0
6	SMC2	-8.82875	-7.09776	0	0	0	0	0	0	0	0	0	0	0	0	0	0	0	0	0	0	0	0	0	0	0	0	0	0	0	0	0	0	0	0	0
6	TPX2	-10.0674	-8.09629	0	0	0	0	0	0	0	0	0	0	0	0	0	0	0	0	0	0	0	0	0	0	0	0	0	0	0	0	0	0	0	0	0
6	KIF14	-8.85207	-7.09469	0	0	0	0	0	0	0	0	0	0	0	0	0	0	0	0	0	0	0	0	0	0	0	0	0	0	0	0	0	0	0	0	0
6	KIAA1524	-9.00657	-7.12568	0	0	0	0	0	0	0	0	0	0	0	0	0	0	0	0	0	0	0	0	0	0	0	0	0	0	0	0	0	0	0	0	0
6	TOP2A	-11.0164	-8.62538	0	0	0	0	0	0	0	0	0	0	0	0	0	0	0	0	0	0	0	0	0	0	0	0	0	0	0	0	0	0	0	0	0
6	NCAPH	-10.2239	-7.6877	0	0	0	0	0	0	0	0	0	0	0	0	0	0	0	0	0	0	0	0	0	0	0	0	0	0	0	0	0	0	0	0	0
6	ABL1	0	-8.72707	0	0	0	0	0	0	0	0	0	0	0	0	0	0	0	0	0	0	0	0	0	0	0	0	0	0	0	0	0	0	0	0	0
6	SOX4	0	-9.21921	0	0	0	0	0	0	0	0	0	0	0	0	0	0	0	0	0	0	0	0	0	0	0	0	0	0	0	0	0	0	0	0	0
6	DZIP1	0	-8.27712	0	0	0	0	0	0	0	0	0	0	0	0	0	0	0	0	0	0	0	0	0	0	0	0	0	0	0	0	0	0	0	0	0
6	DTNA	0	-8.12844	0	0	0	0	0	0	0	0	0	0	0	0	0	0	0	0	0	0	0	0	0	0	0	0	0	0	0	0	0	0	0	0	0
6	IGFBP5	0	-7.99342	0	0	0	0	0	0	0	0	0	0	0	0	0	0	0	0	0	0	0	0	0	0	0	0	0	0	0	0	0	0	0	0	0
6	FAM84A	0	-7.94585	0	0	0	0	0	0	0	0	0	0	0	0	0	0	0	0	0	0	0	0	0	0	0	0	0	0	0	0	0	0	0	0	0
6	SMARCE1	0	-7.85882	0	0	0	0	0	0	0	0	0	0	0	0	0	0	0	0	0	0	0	0	0	0	0	0	0	0	0	0	0	0	0	0	0
6	ELAVL1	0	-7.6716	0	0	0	0	0	0	0	0	0	0	0	0	0	0	0	0	0	0	0	0	0	0	0	0	0	0	0	0	0	0	0	0	0
6	TMEM108	0	-7.64383	0	0	0	0	0	0	0	0	0	0	0	0	0	0	0	0	0	0	0	0	0	0	0	0	0	0	0	0	0	0	0	0	0
6	SEMA6A	0	-7.59609	0	0	0	0	0	0	0	0	0	0	0	0	0	0	0	0	0	0	0	0	0	0	0	0	0	0	0	0	0	0	0	0	0
6	DGKD	0	-7.58006	0	0	0	0	0	0	0	0	0	0	0	0	0	0	0	0	0	0	0	0	0	0	0	0	0	0	0	0	0	0	0	0	0
6	PSD3	0	-7.41137	0	0	0	0	0	0	0	0	0	0	0	0	0	0	0	0	0	0	0	0	0	0	0	0	0	0	0	0	0	0	0	0	0
6	ALS2	0	-7.40081	0	0	0	0	0	0	0	0	0	0	0	0	0	0	0	0	0	0	0	0	0	0	0	0	0	0	0	0	0	0	0	0	0
6	CEP250	0	-7.32165	0	0	0	0	0	0	0	0	0	0	0	0	0	0	0	0	0	0	0	0	0	0	0	0	0	0	0	0	0	0	0	0	0
6	TCF12	0	-7.2922	0	0	0	0	0	0	0	0	0	0	0	0	0	0	0	0	0	0	0	0	0	0	0	0	0	0	0	0	0	0	0	0	0
6	RNF144A	0	-7.29184	0	0	0	0	0	0	0	0	0	0	0	0	0	0	0	0	0	0	0	0	0	0	0	0	0	0	0	0	0	0	0	0	0
6	UBE2E3	0	-7.28567	0	0	0	0	0	0	0	0	0	0	0	0	0	0	0	0	0	0	0	0	0	0	0	0	0	0	0	0	0	0	0	0	0
6	MTMR9	0	-7.23335	0	0	0	0	0	0	0	0	0	0	0	0	0	0	0	0	0	0	0	0	0	0	0	0	0	0	0	0	0	0	0	0	0
6	DHX35	0	-7.20329	0	0	0	0	0	0	0	0	0	0	0	0	0	0	0	0	0	0	0	0	0	0	0	0	0	0	0	0	0	0	0	0	0
6	LRFN5	0	-7.12057	0	0	0	0	0	0	0	0	0	0	0	0	0	0	0	0	0	0	0	0	0	0	0	0	0	0	0	0	0	0	0	0	0
6	ACTC1	0	-7.07234	0	0	0	0	0	0	0	0	0	0	0	0	0	0	0	0	0	0	0	0	0	0	0	0	0	0	0	0	0	0	0	0	0
6	RNF180	0	-7.03414	0	0	0	0	0	0	0	0	0	0	0	0	0	0	0	0	0	0	0	0	0	0	0	0	0	0	0	0	0	0	0	0	0
6	PPARGC1A	0	-7.02097	0	0	0	0	0	0	0	0	0	0	0	0	0	0	0	0	0	0	0	0	0	0	0	0	0	0	0	0	0	0	0	0	0
6	LAMC1	0	-7.01286	0	0	0	0	0	0	0	0	0	0	0	0	0	0	0	0	0	0	0	0	0	0	0	0	0	0	0	0	0	0	0	0	0
6	NBEA	0	-7.46794	0	0	0	0	0	0	0	0	0	0	0	0	0	0	0	0	0	0	0	0	0	0	0	0	0	0	0	0	0	0	0	0	0
6	SELV	0	-7.4766	0	0	0	0	0	0	0	0	0	0	0	0	0	0	0	0	0	0	0	0	0	0	0	0	0	0	0	0	0	0	0	0	0
6	DPP10	0	-7.81886	0	0	0	0	0	0	0	0	0	0	0	0	0	0	0	0	0	0	0	0	0	0	0	0	0	0	0	0	0	0	0	0	0
6	CYP26B1	0	-7.57297	0	0	0	0	0	0	0	0	0	0	0	0	0	0	0	0	0	0	0	0	0	0	0	0	0	0	0	0	0	0	0	0	0
6	NAP1L4	0	-7.58139	0	0	0	0	0	0	0	0	0	0	0	0	0	0	0	0	0	0	0	0	0	0	0	0	0	0	0	0	0	0	0	0	0
6	EML1	0	-7.23708	0	0	0	0	0	0	0	0	0	0	0	0	0	0	0	0	0	0	0	0	0	0	0	0	0	0	0	0	0	0	0	0	0
6	TUBB2A	0	-7.61665	0	0	0	0	0	0	0	0	0	0	0	0	0	0	0	0	0	0	0	0	0	0	0	0	0	0	0	0	0	0	0	0	0
6	LRRC17	0	-7.30903	0	0	0	0	0	0	0	0	0	0	0	0	0	0	0	0	0	0	0	0	0	0	0	0	0	0	0	0	0	0	0	0	0
6	ATP7B	0	-7.65861	0	0	0	0	0	0	0	0	0	0	0	0	0	0	0	0	0	0	0	0	0	0	0	0	0	0	0	0	0	0	0	0	0
6	ARHGAP28	0	-7.74585	0	0	0	0	0	0	0	0	0	0	0	0	0	0	0	0	0	0	0	0	0	0	0	0	0	0	0	0	0	0	0	0	0
6	CXCR7	0	-7.23417	0	0	0	0	0	0	0	0	0	0	0	0	0	0	0	0	0	0	0	0	0	0	0	0	0	0	0	0	0	0	0	0	0
6	EPB41L5	0	-7.1905	0	0	0	0	0	0	0	0	0	0	0	0	0	0	0	0	0	0	0	0	0	0	0	0	0	0	0	0	0	0	0	0	0
6	ALS2CR4	0	-7.11119	0	0	0	0	0	0	0	0	0	0	0	0	0	0	0	0	0	0	0	0	0	0	0	0	0	0	0	0	0	0	0	0	0
6	DBN1	0	-7.82027	0	0	0	0	0	0	0	0	0	0	0	0	0	0	0	0	0	0	0	0	0	0	0	0	0	0	0	0	0	0	0	0	0
6	HSPA12B	0	-7.4982	0	0	0	0	0	0	0	0	0	0	0	0	0	0	0	0	0	0	0	0	0	0	0	0	0	0	0	0	0	0	0	0	0
6	PCDHB3	0	-7.73553	0	0	0	0	0	0	0	0	0	0	0	0	0	0	0	0	0	0	0	0	0	0	0	0	0	0	0	0	0	0	0	0	0
6	HIC2	0	-7.23691	0	0	0	0	0	0	0	0	0	0	0	0	0	0	0	0	0	0	0	0	0	0	0	0	0	0	0	0	0	0	0	0	0
6	PYGO1	0	-7.88577	0	0	0	0	0	0	0	0	0	0	0	0	0	0	0	0	0	0	0	0	0	0	0	0	0	0	0	0	0	0	0	0	0
6	GOLIM4	0	-8.20555	0	0	0	0	0	0	0	0	0	0	0	0	0	0	0	0	0	0	0	0	0	0	0	0	0	0	0	0	0	0	0	0	0
6	KIT	0	-7.73636	0	0	0	0	0	0	0	0	0	0	0	0	0	0	0	0	0	0	0	0	0	0	0	0	0	0	0	0	0	0	0	0	0
6	PBRM1	0	-7.33667	0	0	0	0	0	0	0	0	0	0	0	0	0	0	0	0	0	0	0	0	0	0	0	0	0	0	0	0	0	0	0	0	0
6	PENK	0	-7.25363	0	0	0	0	0	0	0	0	0	0	0	0	0	0	0	0	0	0	0	0	0	0	0	0	0	0	0	0	0	0	0	0	0
6	SERPINB5	0	-7.06398	0	0	0	0	0	0	0	0	0	0	0	0	0	0	0	0	0	0	0	0	0	0	0	0	0	0	0	0	0	0	0	0	0
6	EFNB3	0	-7.5381	0	0	0	0	0	0	0	0	0	0	0	0	0	0	0	0	0	0	0	0	0	0	0	0	0	0	0	0	0	0	0	0	0
6	SMPD4	0	-7.64886	0	0	0	0	0	0	0	0	0	0	0	0	0	0	0	0	0	0	0	0	0	0	0	0	0	0	0	0	0	0	0	0	0
6	TCF3	0	-7.44415	0	0	0	0	0	0	0	0	0	0	0	0	0	0	0	0	0	0	0	0	0	0	0	0	0	0	0	0	0	0	0	0	0
6	RAMP2	0	-7.11333	0	0	0	0	0	0	0	0	0	0	0	0	0	0	0	0	0	0	0	0	0	0	0	0	0	0	0	0	0	0	0	0	0
6	DLL1	0	-8.35636	-7.51263	-7.47286	0	0	0	0	0	0	0	0	0	0	0	0	0	0	0	0	0	0	0	0	0	0	0	0	0	0	0	0	0	0	0
6	CHSY1	0	-8.52063	-7.92968	-7.64229	0	0	0	0	0	0	0	0	0	0	0	0	0	0	0	0	0	0	0	0	0	0	0	0	0	0	0	0	0	0	0
6	ADAMTS9	0	-8.39942	-8.01562	-8.38254	0	0	0	0	0	0	0	0	0	0	0	0	0	0	0	0	0	0	0	0	0	0	0	0	0	0	0	0	0	0	0
6	FBN2	0	-9.07346	-8.29875	-7.0918	0	0	0	0	0	0	0	0	0	0	0	0	0	0	0	0	0	0	0	0	0	0	0	0	0	0	0	0	0	0	0
6	MAP4K4	0	-9.10978	-8.95887	-7.53316	0	0	0	0	0	0	0	0	0	0	0	0	0	0	0	0	0	0	0	0	0	0	0	0	0	0	0	0	0	0	0
6	FSTL1	0	-7.11988	-8.76321	-7.46761	0	0	0	0	0	0	0	0	0	0	0	0	0	0	0	0	0	0	0	0	0	0	0	0	0	0	0	0	0	0	0
6	SCHIP1	0	0	-7.27922	-7.43994	0	0	0	0	0	0	0	0	0	0	0	0	0	0	0	0	0	0	0	0	0	0	0	0	0	0	0	0	0	0	0
6	FRAS1	-7.27571	-8.38757	-7.87786	-7.1595	0	0	0	0	0	0	0	0	0	0	0	0	0	0	0	0	0	0	0	0	0	0	0	0	0	0	0	0	0	0	0
6	CSRP2	-7.13295	-8.39788	-7.74101	-7.76931	0	0	0	0	0	0	0	0	0	0	0	0	0	0	0	0	0	0	0	0	0	0	0	0	0	0	0	0	0	0	0
6	MYO1B	-7.96356	-9.98332	-9.86679	-8.61074	0	0	0	0	0	0	0	0	0	0	0	0	0	0	0	0	0	0	0	0	0	0	0	0	0	0	0	0	0	0	0
6	LGI2	-7.17181	-8.04948	-8.52666	-8.50275	0	0	0	0	0	0	0	0	0	0	0	0	0	0	0	0	0	0	0	0	0	0	0	0	0	0	0	0	0	0	0
6	SERPINH1	-7.59997	-8.72369	-8.62341	-9.01328	0	0	0	0	0	0	0	0	0	0	0	0	0	0	0	0	0	0	0	0	0	0	0	0	0	0	0	0	0	0	0
6	AADAT	-9.24342	-10.7112	-9.10993	-8.57497	0	0	0	0	0	0	0	0	0	0	0	0	0	0	0	0	0	0	0	0	0	0	0	0	0	0	0	0	0	0	0
6	MLLT11	-10.5191	-13.363	-11.2142	-9.53738	0	0	0	0	0	0	0	0	0	0	0	0	0	0	0	0	0	0	0	0	0	0	0	0	0	0	0	0	0	0	0
6	NETO2	-9.57972	-8.38016	-7.66328	-7.23758	0	0	0	0	0	0	0	0	0	0	0	0	0	0	0	0	0	0	0	0	0	0	0	0	0	0	0	0	0	0	0
6	LBR	-9.68563	-9.13044	-7.61891	-7.92959	0	0	0	0	0	0	0	0	0	0	0	0	0	0	0	0	0	0	0	0	0	0	0	0	0	0	0	0	0	0	0
6	CDK8	-9.50785	-9.1851	-8.62614	-7.18017	0	0	0	0	0	0	0	0	0	0	0	0	0	0	0	0	0	0	0	0	0	0	0	0	0	0	0	0	0	0	0
6	TDG	-12.2731	-11.8095	-9.18368	-8.72974	0	0	0	0	0	0	0	0	0	0	0	0	0	0	0	0	0	0	0	0	0	0	0	0	0	0	0	0	0	0	0
6	EIF4E2	-12.3054	-11.1999	-7.92724	-7.42316	0	0	0	0	0	0	0	0	0	0	0	0	0	0	0	0	0	0	0	0	0	0	0	0	0	0	0	0	0	0	0
6	HDGFRP3	0	-7.73585	0	-7.2131	0	0	0	0	0	0	0	0	0	0	0	0	0	0	0	0	0	0	0	0	0	0	0	0	0	0	0	0	0	0	0
6	GDF11	0	-8.11996	0	-7.53874	0	0	0	0	0	0	0	0	0	0	0	0	0	0	0	0	0	0	0	0	0	0	0	0	0	0	0	0	0	0	0
6	TPST1	0	-8.15845	0	-7.75652	0	0	0	0	0	0	0	0	0	0	0	0	0	0	0	0	0	0	0	0	0	0	0	0	0	0	0	0	0	0	0
6	CKAP4	0	-7.4942	0	-7.58486	0	0	0	0	0	0	0	0	0	0	0	0	0	0	0	0	0	0	0	0	0	0	0	0	0	0	0	0	0	0	0
6	COL4A2	0	-7.24375	0	-8.3215	0	0	0	0	0	0	0	0	0	0	0	0	0	0	0	0	0	0	0	0	0	0	0	0	0	0	0	0	0	0	0
6	RBPMS2	0	-7.63819	0	-8.79	0	0	0	0	0	0	0	0	0	0	0	0	0	0	0	0	0	0	0	0	0	0	0	0	0	0	0	0	0	0	0
6	LEPRE1	0	-7.23096	0	-8.57445	0	0	0	0	0	0	0	0	0	0	0	0	0	0	0	0	0	0	0	0	0	0	0	0	0	0	0	0	0	0	0
6	CDKN3	-7.41667	0	0	-7.59254	-9.22311	0	0	0	0	0	0	0	0	0	0	0	0	0	0	0	0	0	0	0	0	0	0	0	0	0	0	0	0	0	0
6	CCNA2	-9.31313	0	0	-7.21946	-7.53226	0	0	0	0	0	0	0	0	0	0	0	0	0	0	0	0	0	0	0	0	0	0	0	0	0	0	0	0	0	0
6	RRM2	-9.04814	0	0	-9.01938	-8.07659	0	0	0	0	0	0	0	0	0	0	0	0	0	0	0	0	0	0	0	0	0	0	0	-7.14785	0	0	0	0	0	0
6	CENPK	-7.99772	0	0	-7.09933	0	0	0	0	0	0	0	0	0	0	0	0	0	0	0	0	0	0	0	0	0	0	0	0	0	0	0	0	0	0	0
6	FEN1	-8.5838	0	0	-7.23163	0	0	0	0	0	0	0	0	0	0	0	0	0	0	0	0	0	0	0	0	0	0	0	0	0	0	0	0	0	0	0
6	KIAA0101	-7.20084	0	0	-7.00666	0	0	0	0	0	0	0	0	0	0	0	0	0	0	0	0	0	0	0	0	0	0	0	0	0	0	0	0	0	0	0
6	TSPAN13	-7.56614	0	0	-7.24453	0	0	0	0	0	0	0	0	0	0	0	0	0	0	0	0	0	0	0	0	0	0	0	0	0	0	0	0	0	0	0
6	ORC6L	-8.77038	-7.5008	0	-7.11461	0	0	0	0	0	0	0	0	0	0	0	0	0	0	0	0	0	0	0	0	0	0	0	0	0	0	0	0	0	0	0
6	DONSON	-9.48541	-7.30134	0	-7.52982	0	0	0	0	0	0	0	0	0	0	0	0	0	0	0	0	0	0	0	0	0	0	0	0	0	0	0	0	0	0	0
6	H2AFV	-9.0088	-8.84319	0	-7.81929	0	0	0	0	0	0	0	0	0	0	0	0	0	0	0	0	0	0	0	0	0	0	0	0	0	0	0	0	0	0	0
6	MYBL2	-11.6377	-8.84086	0	-7.41639	0	0	0	0	0	0	0	0	0	0	0	0	0	0	0	0	0	0	0	0	0	0	0	0	0	0	0	0	0	0	0
6	EIF4G2	-7.92983	-7.00919	0	-7.41596	0	0	0	0	0	0	0	0	0	0	0	0	0	0	0	0	0	0	0	0	0	0	0	0	0	0	0	0	0	0	0
6	UHRF1	-8.65401	-7.24957	0	-7.65281	0	0	0	0	0	0	0	0	0	0	0	0	0	0	0	0	0	0	0	0	0	0	0	0	0	0	0	0	0	0	0
6	PANK3	-8.51095	-7.3488	0	-8.51374	0	0	0	0	0	0	0	0	0	0	0	0	0	0	0	0	0	0	0	0	0	0	0	0	0	0	0	0	0	0	0
6	GPR137C	-7.38122	-7.04795	0	-7.1791	0	0	0	0	0	0	0	0	0	0	0	0	0	0	0	0	0	0	0	0	0	0	0	0	0	0	0	0	0	0	0
6	MAPK6	-8.85207	-8.3559	0	-8.39948	0	0	0	0	0	0	0	0	0	0	0	0	0	0	0	0	0	0	0	0	0	0	0	0	0	0	0	0	0	0	0
6	ENTPD7	-10.3841	-9.87095	0	-10.513	0	0	0	0	0	0	0	0	0	0	0	0	0	0	0	0	0	0	0	0	0	0	0	0	0	0	0	0	0	0	0
6	KIRREL2	-7.07123	-8.08392	0	-7.86729	0	0	0	0	0	0	0	0	0	0	0	0	0	0	0	0	0	0	0	0	0	0	0	0	0	0	0	0	0	0	0
6	ITM2C	-7.08582	-8.23451	0	-8.03818	0	0	0	0	0	0	0	0	0	0	0	0	0	0	0	0	0	0	0	0	0	0	0	0	0	0	0	0	0	0	0
6	BTBD11	-7.12922	-8.02852	0	-7.31313	0	0	0	0	0	0	0	0	0	0	0	0	0	0	0	0	0	0	0	0	0	0	0	0	0	0	0	0	0	0	0
6	IGFBP2	-7.21995	-8.2432	0	-7.45413	0	0	0	0	0	0	0	0	0	0	0	0	0	0	0	0	0	0	0	0	0	0	0	0	0	0	0	0	0	0	0
6	APLP1	0	0	0	-8.40603	0	0	0	0	0	0	0	0	0	0	0	0	0	0	0	0	0	0	0	0	0	0	0	0	0	0	0	0	0	0	0
6	SDC1	0	0	0	-9.18214	0	0	0	0	0	0	0	0	0	0	0	0	0	0	0	0	0	0	0	0	0	0	0	0	0	0	0	0	0	0	0
6	ACOT7	0	0	0	-7.7767	0	0	0	0	0	0	0	0	0	0	0	0	0	0	0	0	0	0	0	0	0	0	0	0	0	0	0	0	0	0	0
6	SPON2	0	0	0	-7.66199	0	0	0	0	0	0	0	0	0	0	0	0	0	0	0	0	0	0	0	0	0	0	0	0	0	0	0	0	0	0	0
6	PDLIM7	0	0	0	-7.26803	0	0	0	0	0	0	0	0	0	0	0	0	0	0	0	0	0	0	0	0	0	0	0	0	0	0	0	0	0	0	0
6	HOMER1	0	0	0	-7.24016	0	0	0	0	0	0	0	0	0	0	0	0	0	0	0	0	0	0	0	0	0	0	0	0	0	0	0	0	0	0	0
6	PTPLAD1	0	0	0	-7.21926	0	0	0	0	0	0	0	0	0	0	0	0	0	0	0	0	0	0	0	0	0	0	0	0	0	0	0	0	0	0	0
6	F2R	0	0	0	-7.04393	0	0	0	0	0	0	0	0	0	0	0	0	0	0	0	0	0	0	0	0	0	0	0	0	0	0	0	0	0	0	0
6	CCNYL1	0	0	0	-7.02906	0	0	0	0	0	0	0	0	0	0	0	0	0	0	0	0	0	0	0	0	0	0	0	0	0	0	0	0	0	0	0
6	2011-09-11	0	0	0	-7.9589	0	0	0	0	0	0	0	0	0	0	0	0	0	0	0	0	0	0	0	0	0	0	0	0	0	0	0	0	0	0	0
6	CHN1	0	0	0	-7.18666	0	0	0	0	0	0	0	0	0	0	0	0	0	0	0	0	0	0	0	0	0	0	0	0	0	0	0	0	0	0	0
6	FADS1	0	0	0	-7.88704	0	0	0	0	0	0	0	0	0	0	0	0	0	0	0	0	0	0	0	0	0	0	0	0	0	0	0	0	0	0	0
6	TM7SF2	0	0	0	-7.82505	0	0	0	0	0	0	0	0	0	0	0	0	0	0	0	0	0	0	0	0	0	0	0	0	0	0	0	0	0	0	0
6	RAI14	0	0	0	-8.26584	0	0	0	0	0	0	0	0	0	0	0	0	0	0	0	0	0	0	0	0	0	0	0	0	0	0	0	0	0	0	0
6	SPARC	0	0	0	-7.39722	0	0	0	0	0	0	0	0	0	0	0	0	0	0	0	0	0	0	0	0	0	0	0	0	0	0	0	0	0	0	0
6	LAMB1	0	0	0	-7.83378	0	0	0	0	0	0	0	0	0	0	0	0	0	0	0	0	0	0	0	0	0	0	0	0	0	0	0	0	0	0	0
6	COL15A1	0	0	0	-8.45395	0	0	0	0	0	0	0	0	0	0	0	0	0	0	0	0	0	0	0	0	0	0	0	0	0	0	0	0	0	0	0
6	SLIT2	0	0	0	-7.21333	0	0	0	0	0	0	0	0	0	0	0	0	0	0	0	0	0	0	0	0	0	0	0	0	0	0	0	0	0	0	0
6	ARL5B	0	0	0	-7.12993	0	0	0	0	0	0	0	0	0	0	0	0	0	0	0	0	0	0	0	0	0	0	0	0	0	0	0	0	0	0	0
6	RGS3	0	0	0	-7.94167	0	0	0	0	0	0	0	0	0	0	0	0	0	0	0	0	0	0	0	0	0	0	0	0	0	0	0	0	0	0	0
6	COL4A1	0	0	0	-8.71281	0	0	0	0	0	0	0	0	0	0	0	-7.00504	0	0	0	0	0	0	0	0	0	0	0	0	0	0	0	0	0	0	0
6	GALNT1	0	0	0	-7.00495	0	0	0	0	0	0	0	0	0	0	0	0	0	0	0	0	0	0	0	-7.33968	0	0	0	0	0	0	0	0	0	0	0
6	SNAI2	0	0	0	-7.47866	0	0	0	0	0	0	0	0	0	0	0	0	0	0	0	0	0	0	0	-7.78519	0	0	0	0	0	0	0	0	0	0	0
6	COL6A1	0	0	0	-8.87516	0	0	0	0	0	0	0	0	0	0	0	0	0	0	0	0	0	0	0	-7.06231	0	0	0	0	0	0	0	0	0	0	0
6	NP	-7.15926	0	0	-8.47706	0	0	0	0	0	0	0	0	0	0	0	0	0	0	0	0	0	0	0	-7.35916	0	0	0	0	0	0	0	0	0	0	0
6	CEP78	-8.71758	-7.6422	-8.12556	0	-7.01954	0	0	0	0	0	0	0	0	0	0	0	0	0	0	0	0	0	0	0	0	0	0	0	0	0	0	0	0	0	0
6	FAM64A	-10.7309	-8.60291	-7.57476	0	-7.26464	0	0	0	0	0	0	0	0	0	0	0	0	0	0	0	0	0	0	0	0	0	0	0	0	0	0	0	0	0	0
6	ORC1L	-7.92996	0	-7.00203	0	-8.29858	0	0	0	0	0	0	0	0	0	0	0	0	0	0	0	0	0	0	0	0	0	0	0	0	0	0	0	0	0	0
6	GSG2	-9.37928	-7.28536	0	0	-7.22629	0	0	0	0	0	0	0	0	0	0	0	0	0	0	0	0	0	0	0	0	0	0	0	0	0	0	0	0	0	0
6	OIP5	-9.54798	-7.04634	0	0	-7.15851	0	0	0	0	0	0	0	0	0	0	0	0	0	0	0	0	0	0	0	0	0	0	0	0	0	0	0	0	0	0
6	ZWINT	-10.1161	-7.9113	0	0	-7.30263	0	0	0	0	0	0	0	0	0	0	0	0	0	0	0	0	0	0	0	0	0	0	0	0	0	0	0	0	0	0
6	DTL	-9.80985	-8.67497	0	0	-7.8428	0	0	0	0	0	0	0	0	0	0	0	0	0	0	0	0	0	0	0	0	0	0	0	0	0	0	0	0	0	0
6	GINS2	-8.53426	-7.01032	0	0	-8.48862	0	0	0	0	0	0	0	0	0	0	0	0	0	0	0	0	0	0	0	0	0	0	0	0	0	0	0	0	0	0
6	FANCI	-9.93174	-7.88277	-7.33985	-7.02659	-7.32717	0	0	0	0	0	0	0	0	0	0	0	0	0	0	0	0	0	0	0	0	0	0	0	0	0	0	0	0	0	0
6	MCM10	-10.5298	-8.24533	-7.23489	-7.1727	-8.02205	0	0	0	0	0	0	0	0	0	0	0	0	0	0	0	0	0	0	0	0	0	0	0	0	0	0	0	0	0	0
6	CDC6	-10.3774	-7.53555	-7.17229	-7.50863	-7.99684	0	0	0	0	0	0	0	0	0	0	0	0	0	0	0	0	0	0	0	0	0	0	0	0	0	0	0	0	0	0
6	DEPDC1B	-10.6906	-8.87407	-7.557	-8.45233	-7.2866	0	0	0	0	0	0	0	0	0	0	0	0	0	0	0	0	0	0	0	0	0	0	0	0	0	0	0	0	0	0
6	CDC45L	-9.54442	-7.3456	0	-7.41469	-7.77553	0	0	0	0	0	0	0	0	0	0	0	0	0	0	0	0	0	0	0	0	0	0	0	0	0	0	0	0	0	0
6	UBE2T	-10.0711	-7.45237	0	-7.64933	-7.77778	0	0	0	0	0	0	0	0	0	0	0	0	0	0	0	0	0	0	0	0	0	0	0	0	0	0	0	0	0	0
6	CENPA	-9.57771	-7.42074	0	-7.09119	-7.24718	0	0	0	0	0	0	0	0	0	0	0	0	0	0	0	0	0	0	0	0	0	0	0	0	0	0	0	0	0	0
6	PLK1	-7.61332	0	0	0	-7.55191	0	0	0	0	0	0	0	0	0	0	0	0	0	0	0	0	0	0	0	0	0	0	0	0	0	0	0	0	0	0
6	ESCO2	-7.82625	0	0	0	-7.71305	0	0	0	0	0	0	0	0	0	0	0	0	0	0	0	0	0	0	0	0	0	0	0	0	0	0	0	0	0	0
6	EZH2	-7.7276	0	0	0	-8.04631	0	0	0	0	0	0	0	0	0	0	0	0	0	0	0	0	0	0	0	0	0	0	0	0	0	0	0	0	0	0
6	CDC20	-8.04171	0	0	0	-7.25764	0	0	0	0	0	0	0	0	0	0	0	0	0	0	0	0	0	0	0	0	0	0	0	0	0	0	0	0	0	0
6	AURKA	-8.39482	0	0	0	-7.64255	0	0	0	0	0	0	0	0	0	0	0	0	0	0	0	0	0	0	0	0	0	0	0	0	0	0	0	0	0	0
6	POLE2	-7.86592	0	0	0	-7.28178	0	0	0	0	0	0	0	0	0	0	0	0	0	0	0	0	0	0	0	0	0	0	0	0	0	0	0	0	0	0
6	EXO1	-9.15527	0	0	0	-8.45428	0	0	0	0	0	0	0	0	0	0	0	0	0	0	0	0	0	0	0	0	0	0	0	0	0	0	0	0	0	0
6	ASPM	-8.30266	0	0	0	-7.62772	0	0	0	0	0	0	0	0	0	0	0	0	0	0	0	0	0	0	0	0	0	0	0	0	0	0	0	0	0	0
6	CDC2	-7.93479	0	0	0	-7.43314	0	0	0	0	0	0	0	0	0	0	0	0	0	0	0	0	0	0	0	0	0	0	0	0	0	0	0	0	0	0
6	BUB1	-8.16418	0	0	0	-7.65374	0	0	0	0	0	0	0	0	0	0	0	0	0	0	0	0	0	0	0	0	0	0	0	0	0	0	0	0	0	0
6	MAD2L1	-7.72467	0	0	0	-7.31376	0	0	0	0	0	0	0	0	0	0	0	0	0	0	0	0	0	0	0	0	0	0	0	0	0	0	0	0	0	0
6	CDCA2	-8.16579	0	0	0	-7.16476	0	0	0	0	0	0	0	0	0	0	0	0	0	0	0	0	0	0	0	0	0	0	0	0	0	0	0	0	0	0
6	MELK	-8.36724	0	0	0	-7.3433	0	0	0	0	0	0	0	0	0	0	0	0	0	0	0	0	0	0	0	0	0	0	0	0	0	0	0	0	0	0
6	UBE2S	-8.05956	0	0	0	-7.03921	0	0	0	0	0	0	0	0	0	0	0	0	0	0	0	0	0	0	0	0	0	0	0	0	0	0	0	0	0	0
6	BIRC5	-8.69235	0	0	0	-7.44221	0	0	0	0	0	0	0	0	0	0	0	0	0	0	0	0	0	0	0	0	0	0	0	0	0	0	0	0	0	0
6	CENPE	-8.85982	0	0	0	-7.43299	0	0	0	0	0	0	0	0	0	0	0	0	0	0	0	0	0	0	0	0	0	0	0	0	0	0	0	0	0	0
6	NUF2	-9.6138	0	0	0	-8.05267	0	0	0	0	0	0	0	0	0	0	0	0	0	0	0	0	0	0	0	0	0	0	0	0	0	0	0	0	0	0
6	MLF1IP	-8.58747	0	0	0	-7.07733	0	0	0	0	0	0	0	0	0	0	0	0	0	0	0	0	0	0	0	0	0	0	0	0	0	0	0	0	0	0
6	UBE2C	-9.44578	0	0	0	-7.1934	0	0	0	0	0	0	0	0	0	0	0	0	0	0	0	0	0	0	0	0	0	0	0	0	0	0	0	0	0	0
6	DIAPH3	-7.18073	0	0	0	-8.2076	0	0	0	0	0	0	0	0	0	0	0	0	0	0	0	0	0	0	0	0	0	0	0	0	0	0	0	0	0	0
6	DEPDC1	-7.67359	0	0	0	-8.56994	0	0	0	0	0	0	0	0	0	0	0	0	0	0	0	0	0	0	0	0	0	0	0	0	0	0	0	0	0	0
6	SGOL2	-7.00183	0	0	0	-8.55386	0	0	0	0	0	0	0	0	0	0	0	0	0	0	0	0	0	0	0	0	0	0	0	0	0	0	0	0	0	0
6	CCNE2	0	0	0	0	-7.71173	0	0	0	0	0	0	0	0	0	0	0	0	0	0	0	0	0	0	0	0	0	0	0	0	0	0	0	0	0	0
6	PPIL5	0	0	0	0	-8.33455	0	0	0	0	0	0	0	0	0	0	0	0	0	0	0	0	0	0	0	0	0	0	0	0	0	0	0	0	0	0
6	CKAP2L	0	0	0	0	-7.32209	0	0	0	0	0	0	0	0	0	0	0	0	0	0	0	0	0	0	0	0	0	0	0	0	0	0	0	0	0	0
6	STIL	0	0	0	0	-7.30348	0	0	0	0	0	0	0	0	0	0	0	0	0	0	0	0	0	0	0	0	0	0	0	0	0	0	0	0	0	0
6	PDSS1	0	0	0	0	-7.25201	0	0	0	0	0	0	0	0	0	0	0	0	0	0	0	0	0	0	0	0	0	0	0	0	0	0	0	0	0	0
6	ANLN	0	0	0	0	-7.7057	0	0	0	0	0	0	0	0	0	0	0	0	0	0	0	0	0	0	0	0	0	0	0	0	0	0	0	0	0	0
6	DBF4	0	0	0	0	-7.24354	0	0	0	0	0	0	0	0	0	0	0	0	0	0	0	0	0	0	0	0	0	0	0	0	0	0	0	0	0	0
6	CDCA8	-9.37239	0	0	0	0	0	0	0	0	0	0	0	0	0	0	0	0	0	0	0	0	0	0	0	0	0	0	0	0	0	0	0	0	0	0
6	KIF2C	-9.41813	0	0	0	0	0	0	0	0	0	0	0	0	0	0	0	0	0	0	0	0	0	0	0	0	0	0	0	0	0	0	0	0	0	0
6	CCNF	-9.22383	0	0	0	0	0	0	0	0	0	0	0	0	0	0	0	0	0	0	0	0	0	0	0	0	0	0	0	0	0	0	0	0	0	0
6	AURKB	-9.19984	0	0	0	0	0	0	0	0	0	0	0	0	0	0	0	0	0	0	0	0	0	0	0	0	0	0	0	0	0	0	0	0	0	0
6	NCAPG	-8.97658	0	0	0	0	0	0	0	0	0	0	0	0	0	0	0	0	0	0	0	0	0	0	0	0	0	0	0	0	0	0	0	0	0	0
6	SPAG5	-8.94158	0	0	0	0	0	0	0	0	0	0	0	0	0	0	0	0	0	0	0	0	0	0	0	0	0	0	0	0	0	0	0	0	0	0
6	CDCA5	-8.92033	0	0	0	0	0	0	0	0	0	0	0	0	0	0	0	0	0	0	0	0	0	0	0	0	0	0	0	0	0	0	0	0	0	0
6	KPNA2	-8.80236	0	0	0	0	0	0	0	0	0	0	0	0	0	0	0	0	0	0	0	0	0	0	0	0	0	0	0	0	0	0	0	0	0	0
6	CKAP2	-8.73712	0	0	0	0	0	0	0	0	0	0	0	0	0	0	0	0	0	0	0	0	0	0	0	0	0	0	0	0	0	0	0	0	0	0
6	H2AFZ	-8.61685	0	0	0	0	0	0	0	0	0	0	0	0	0	0	0	0	0	0	0	0	0	0	0	0	0	0	0	0	0	0	0	0	0	0
6	RNASEH2A	-8.4941	0	0	0	0	0	0	0	0	0	0	0	0	0	0	0	0	0	0	0	0	0	0	0	0	0	0	0	0	0	0	0	0	0	0
6	CDC25C	-8.4888	0	0	0	0	0	0	0	0	0	0	0	0	0	0	0	0	0	0	0	0	0	0	0	0	0	0	0	0	0	0	0	0	0	0
6	FAM83D	-8.23837	0	0	0	0	0	0	0	0	0	0	0	0	0	0	0	0	0	0	0	0	0	0	0	0	0	0	0	0	0	0	0	0	0	0
6	RANBP1	-8.19866	0	0	0	0	0	0	0	0	0	0	0	0	0	0	0	0	0	0	0	0	0	0	0	0	0	0	0	0	0	0	0	0	0	0
6	HMGCR	-8.14046	0	0	0	0	0	0	0	0	0	0	0	0	0	0	0	0	0	0	0	0	0	0	0	0	0	0	0	0	0	0	0	0	0	0
6	RAB15	-7.9495	0	0	0	0	0	0	0	0	0	0	0	0	0	0	0	0	0	0	0	0	0	0	0	0	0	0	0	0	0	0	0	0	0	0
6	GGH	-7.94888	0	0	0	0	0	0	0	0	0	0	0	0	0	0	0	0	0	0	0	0	0	0	0	0	0	0	0	0	0	0	0	0	0	0
6	KIF11	-7.89613	0	0	0	0	0	0	0	0	0	0	0	0	0	0	0	0	0	0	0	0	0	0	0	0	0	0	0	0	0	0	0	0	0	0
6	FBXO5	-7.86838	0	0	0	0	0	0	0	0	0	0	0	0	0	0	0	0	0	0	0	0	0	0	0	0	0	0	0	0	0	0	0	0	0	0
6	SPC25	-7.84494	0	0	0	0	0	0	0	0	0	0	0	0	0	0	0	0	0	0	0	0	0	0	0	0	0	0	0	0	0	0	0	0	0	0
6	TYMS	-7.83894	0	0	0	0	0	0	0	0	0	0	0	0	0	0	0	0	0	0	0	0	0	0	0	0	0	0	0	0	0	0	0	0	0	0
6	PTTG1	-7.81309	0	0	0	0	0	0	0	0	0	0	0	0	0	0	0	0	0	0	0	0	0	0	0	0	0	0	0	0	0	0	0	0	0	0
6	MKI67	-7.75058	0	0	0	0	0	0	0	0	0	0	0	0	0	0	0	0	0	0	0	0	0	0	0	0	0	0	0	0	0	0	0	0	0	0
6	TMPO	-7.74472	0	0	0	0	0	0	0	0	0	0	0	0	0	0	0	0	0	0	0	0	0	0	0	0	0	0	0	0	0	0	0	0	0	0
6	RRM1	-7.74014	0	0	0	0	0	0	0	0	0	0	0	0	0	0	0	0	0	0	0	0	0	0	0	0	0	0	0	0	0	0	0	0	0	0
6	TRIAP1	-7.73597	0	0	0	0	0	0	0	0	0	0	0	0	0	0	0	0	0	0	0	0	0	0	0	0	0	0	0	0	0	0	0	0	0	0
6	MND1	-7.72424	0	0	0	0	0	0	0	0	0	0	0	0	0	0	0	0	0	0	0	0	0	0	0	0	0	0	0	0	0	0	0	0	0	0
6	TBC1D7	-7.69039	0	0	0	0	0	0	0	0	0	0	0	0	0	0	0	0	0	0	0	0	0	0	0	0	0	0	0	0	0	0	0	0	0	0
6	ESPL1	-7.56675	0	0	0	0	0	0	0	0	0	0	0	0	0	0	0	0	0	0	0	0	0	0	0	0	0	0	0	0	0	0	0	0	0	0
6	KIF20A	-7.50679	0	0	0	0	0	0	0	0	0	0	0	0	0	0	0	0	0	0	0	0	0	0	0	0	0	0	0	0	0	0	0	0	0	0
6	ECT2	-7.48031	0	0	0	0	0	0	0	0	0	0	0	0	0	0	0	0	0	0	0	0	0	0	0	0	0	0	0	0	0	0	0	0	0	0
6	ANKRD32	-7.39471	0	0	0	0	0	0	0	0	0	0	0	0	0	0	0	0	0	0	0	0	0	0	0	0	0	0	0	0	0	0	0	0	0	0
6	CKS1B	-7.34923	0	0	0	0	0	0	0	0	0	0	0	0	0	0	0	0	0	0	0	0	0	0	0	0	0	0	0	0	0	0	0	0	0	0
6	PSMC1	-7.34699	0	0	0	0	0	0	0	0	0	0	0	0	0	0	0	0	0	0	0	0	0	0	0	0	0	0	0	0	0	0	0	0	0	0
6	TMEM189	-7.33181	0	0	0	0	0	0	0	0	0	0	0	0	0	0	0	0	0	0	0	0	0	0	0	0	0	0	0	0	0	0	0	0	0	0
6	VPS45	-7.2982	0	0	0	0	0	0	0	0	0	0	0	0	0	0	0	0	0	0	0	0	0	0	0	0	0	0	0	0	0	0	0	0	0	0
6	TDP1	-7.29531	0	0	0	0	0	0	0	0	0	0	0	0	0	0	0	0	0	0	0	0	0	0	0	0	0	0	0	0	0	0	0	0	0	0
6	FANCG	-7.20269	0	0	0	0	0	0	0	0	0	0	0	0	0	0	0	0	0	0	0	0	0	0	0	0	0	0	0	0	0	0	0	0	0	0
6	RAD54L	-7.18492	0	0	0	0	0	0	0	0	0	0	0	0	0	0	0	0	0	0	0	0	0	0	0	0	0	0	0	0	0	0	0	0	0	0
6	PARP1	-7.18107	0	0	0	0	0	0	0	0	0	0	0	0	0	0	0	0	0	0	0	0	0	0	0	0	0	0	0	0	0	0	0	0	0	0
6	DDX52	-7.16564	0	0	0	0	0	0	0	0	0	0	0	0	0	0	0	0	0	0	0	0	0	0	0	0	0	0	0	0	0	0	0	0	0	0
6	TROAP	-7.04224	0	0	0	0	0	0	0	0	0	0	0	0	0	0	0	0	0	0	0	0	0	0	0	0	0	0	0	0	0	0	0	0	0	0
6	ACBD7	-7.03264	0	0	0	0	0	0	0	0	0	0	0	0	0	0	0	0	0	0	0	0	0	0	0	0	0	0	0	0	0	0	0	0	0	0
6	CASP3	-7.04641	0	0	0	0	0	0	0	0	0	0	0	0	0	0	0	0	0	0	0	0	0	0	0	0	0	0	0	0	0	0	0	0	0	0
6	DSCR6	-7.22986	0	0	0	0	0	0	0	0	0	0	0	0	0	0	0	0	0	0	0	0	0	0	0	0	0	0	0	0	0	0	0	0	0	0
6	HIST2H3C	-7.92151	0	0	0	0	0	0	0	0	0	0	0	0	0	0	0	0	0	0	0	0	0	0	0	0	0	0	0	0	0	0	0	0	0	0
6	KIF23	-8.00835	0	0	0	0	0	0	0	0	0	0	0	0	0	0	0	0	0	0	0	0	0	0	0	0	0	0	0	0	0	0	0	0	0	0
6	TTK	-8.17359	0	0	0	0	0	0	0	0	0	0	0	0	0	0	0	0	0	0	0	0	0	0	0	0	0	0	0	0	0	0	0	0	0	0
6	LMNB1	-7.13527	0	0	0	0	0	0	0	0	0	0	0	0	0	0	0	0	0	0	0	0	0	0	0	0	0	0	0	0	0	0	0	0	0	0
6	XRCC2	-7.37348	0	0	0	0	0	0	0	0	0	0	0	0	0	0	0	0	0	0	0	0	0	0	0	0	0	0	0	0	0	0	0	0	0	0
6	GAS2L3	-7.00504	0	0	0	0	0	0	0	0	0	0	0	0	0	0	0	0	0	0	0	0	0	0	0	0	0	0	0	0	0	0	0	0	0	0
6	DSCR8	-7.14625	0	0	0	0	0	0	0	0	0	0	0	0	0	0	0	0	0	0	0	0	0	0	0	0	0	0	0	0	0	0	0	0	0	0
6	FAM32A	-7.02684	0	0	0	0	0	0	0	0	0	0	0	0	0	0	0	0	0	0	0	0	0	0	0	0	0	0	0	0	0	0	0	0	0	0
6	NEIL3	-7.12376	0	0	0	0	0	0	0	0	0	0	0	0	0	0	0	0	0	0	0	0	0	0	0	0	0	0	0	0	0	0	0	0	0	0
6	SLC16A14	-7.62334	0	0	0	0	0	0	0	0	0	0	0	0	0	0	0	0	0	0	0	0	0	0	0	0	0	0	0	0	0	0	0	0	0	0
6	PRR11	-7.55778	0	0	0	0	0	0	0	0	0	0	0	0	0	0	0	0	0	0	0	0	0	0	0	0	0	0	0	0	0	0	0	0	0	0
6	ANP32E	-7.99432	0	0	0	0	0	0	0	0	0	0	0	0	0	0	0	0	0	0	0	0	0	0	0	0	0	0	0	0	0	0	0	0	0	0
6	FANCM	-7.23013	0	0	0	0	0	0	0	0	0	0	0	0	0	0	0	0	0	0	0	0	0	0	0	0	0	0	0	0	0	0	0	0	0	0
6	CLSPN	-7.40655	0	0	0	0	0	0	0	0	0	0	0	0	0	0	0	0	0	0	0	0	0	0	0	0	0	0	0	0	0	0	0	0	0	0
6	SFRS3	-7.80778	0	0	0	0	0	0	0	0	0	0	0	0	0	0	0	0	0	0	0	0	0	0	0	0	0	0	0	0	0	0	0	0	0	0
6	RAD51C	-7.216	0	0	0	0	0	0	0	0	0	0	0	0	0	0	0	0	0	0	0	0	0	0	0	0	0	0	0	0	0	0	0	0	0	0
6	CDCA3	-8.5836	0	0	0	0	0	0	0	0	0	0	0	0	0	0	0	0	0	0	0	0	0	0	0	0	0	0	0	0	0	0	0	0	0	0
6	NUSAP1	-8.67019	0	0	0	0	0	0	0	0	0	0	0	0	0	0	0	0	0	0	0	0	0	0	0	0	0	0	0	0	0	0	0	0	0	0
6	PRC1	-8.00012	0	0	0	0	0	0	0	0	0	0	0	0	0	0	0	0	0	0	0	0	0	0	0	0	0	0	0	0	0	0	0	0	0	0
6	ARHGAP11A	-7.36914	0	0	0	0	0	0	0	0	0	0	0	0	0	0	0	0	0	0	0	0	0	0	0	0	0	0	0	0	0	0	0	0	0	0
6	HIST1H4C	-7.3959	0	0	0	0	0	0	0	0	0	0	0	0	0	0	0	0	0	0	0	0	0	0	0	0	0	0	0	0	0	0	0	0	0	0
6	RAB2B	-7.02684	0	0	0	0	0	0	0	0	0	0	0	0	0	0	0	0	0	0	0	0	0	0	0	0	0	0	0	0	0	0	0	0	0	0
6	KIF18A	-8.21875	0	0	0	0	0	0	0	0	0	0	0	0	0	0	0	0	0	0	0	0	0	0	0	0	0	0	0	0	0	0	0	0	0	0
6	RACGAP1	-8.32365	0	0	0	0	0	0	0	0	0	0	0	0	0	0	0	0	0	0	0	0	0	0	0	0	0	0	0	0	0	0	0	0	0	0
6	MAPRE1	-8.06176	0	0	0	0	0	0	0	0	0	0	0	0	0	0	0	0	0	0	0	0	0	0	0	0	0	0	0	0	0	0	0	0	0	0
6	OTUB2	-7.5868	0	0	0	0	0	0	0	0	0	0	0	0	0	0	0	0	0	0	0	0	0	0	0	0	0	0	0	0	0	0	0	0	0	0
6	TUBA1C	-7.18091	0	0	0	0	0	0	0	0	0	0	0	0	0	0	0	0	0	0	0	0	0	0	0	0	0	0	0	0	0	0	0	0	0	0
6	NDC80	-7.23868	0	0	0	0	0	0	0	0	0	0	0	0	0	0	0	0	0	0	0	0	0	0	0	0	0	0	0	0	0	0	0	0	0	0
6	SIP1	-7.4706	0	0	0	0	0	0	0	0	0	0	0	0	0	0	0	0	0	0	0	0	0	0	0	0	0	0	0	0	0	0	0	0	0	0
6	ERH	-7.7566	0	0	0	0	0	0	0	0	0	0	0	0	0	0	0	0	0	0	0	0	0	0	0	0	0	0	0	0	0	0	0	0	0	0
6	WHSC1	-7.43706	0	0	0	0	0	0	0	0	0	0	0	0	0	0	0	0	0	0	0	0	0	0	0	0	0	0	0	0	0	0	0	0	0	0
6	RFC4	-7.95831	0	0	0	0	0	0	0	0	0	0	0	0	0	0	0	0	0	0	0	0	0	0	0	0	0	0	0	0	0	0	0	0	0	0
6	GTSE1	-8.3324	0	0	0	0	0	0	0	0	0	0	0	0	0	0	0	0	0	0	0	0	0	0	0	0	0	0	0	0	0	0	0	0	0	0
6	INCENP	-7.23463	0	0	0	0	0	0	0	0	0	0	0	0	0	0	0	0	0	0	0	0	0	0	0	0	0	0	0	0	0	0	0	0	0	0
6	KIFC1	-7.2817	0	0	0	0	0	0	0	0	0	0	0	0	0	0	0	0	0	0	0	0	0	0	0	0	0	0	0	0	0	0	0	0	0	0
6	FOXM1	-7.77074	0	0	0	0	0	0	0	0	0	0	0	0	0	0	0	0	0	0	0	0	0	0	0	0	0	0	0	0	0	0	0	0	0	0
6	ZWILCH	-7.23072	0	0	0	0	0	0	0	0	0	0	0	0	0	0	0	0	0	0	0	0	0	0	0	0	0	0	0	0	0	0	0	0	0	0
6	PRPSAP1	-7.20068	0	0	0	0	0	0	0	0	0	0	0	0	0	0	0	0	0	0	0	0	0	0	0	0	0	0	0	0	0	0	0	0	0	0
6	CCNB1	-8.87085	0	0	0	0	0	0	0	0	0	0	0	0	0	0	0	0	0	0	0	0	0	0	0	0	0	0	0	0	0	0	0	0	0	0
6	CCNB2	-8.97223	0	0	0	0	0	0	0	0	0	0	0	0	0	0	0	0	0	0	0	0	0	0	0	0	0	0	0	0	0	0	0	0	0	0
6	NEK2	-8.47605	0	0	0	0	0	0	0	0	0	0	0	0	0	0	0	0	0	0	0	0	0	0	0	0	0	0	0	0	0	0	0	0	0	0
6	CEP76	-8.34806	0	0	0	0	0	0	0	0	0	0	0	0	0	0	0	0	0	0	0	0	0	0	0	0	0	0	0	0	0	0	0	0	0	0
6	GMNN	-8.33986	0	0	0	0	0	0	0	0	0	0	0	0	0	0	0	0	0	0	0	0	0	0	0	0	0	0	0	0	0	0	0	0	0	0
6	CASC5	-7.88358	0	0	0	0	0	0	0	0	0	0	0	0	0	0	0	0	0	0	0	0	0	0	0	0	0	0	0	0	0	0	0	0	0	0
6	CTSL2	-7.45977	0	0	0	0	0	0	0	0	0	0	0	0	0	0	0	0	0	0	0	0	0	0	0	0	0	0	0	0	0	0	0	0	0	0
6	DSN1	-7.44498	0	0	0	0	0	0	0	0	0	0	0	0	0	0	0	0	0	0	0	0	0	0	0	0	0	0	0	0	0	0	0	0	0	0
